# Supplementary material
Source: PubMed Central journal article supplement (PMC5278887)
Supplement: res-120-341-s001.pdf [file res-120-341-s001.pdf]

**Original gene set ID**

MP:0006396  
GO:0034381  
ENSG000000205250  
ENSG000000132005  
MP:0000708  
ENSG000000167553  
ENSG000000170421  
MP:0003645  
ENSG000000166866  
REACTOME\_APOPTOTIC\_EXECUTION\_\_PHASE  
MP:0008182  
GO:0008375  
ENSG000000131941  
ENSG000000169710  
REACTOME\_APOPTOTIC\_CLEAVAGE\_OF\_CELLULAR\_PROTEINS  
ENSG00000013297  
ENSG000000070159  
ENSG000000091409  
ENSG000000178209  
REACTOME\_P75\_NTR\_RECEPTOR:MEDIATED\_SIGNALLING  
GO:0001890  
ENSG000000164344  
MP:0002136  
MP:0002655  
ENSG000000143375  
MP:0005595  
ENSG000000122641  
MP:0002764  
MP:0003662  
ENSG000000169047  
ENSG000000125503  
MP:0001179  
GO:0043256  
ENSG000000116809  
GO:0050431  
ENSG000000039560  
ENSG000000164733  
ENSG000000139567  
MP:0005590  
GO:0071813  
GO:0071814  
MP:0002082  
GO:0071902  
ENSG000000130147  
GO:0005178  
ENSG000000133056  
ENSG000000172725  
ENSG000000136286  
ENSG000000078142

**Original gene set description**

decreased long bone epiphyseal plate size  
plasma lipoprotein particle clearance  
E2F4 PPI subnetwork  
RFX1 PPI subnetwork  
thymus hyperplasia  
TUBA1C PPI subnetwork  
KRT8 PPI subnetwork  
increased pancreatic beta cell number  
MYO1A PPI subnetwork  
REACTOME\_APOPTOTIC\_EXECUTION\_\_PHASE  
decreased marginal zone B cell number  
acetylglucosaminyltransferase activity  
RHPN2 PPI subnetwork  
FASN PPI subnetwork  
REACTOME\_APOPTOTIC\_CLEAVAGE\_OF\_CELLULAR\_PROTEINS  
CLDN11 PPI subnetwork  
PTPN3 PPI subnetwork  
ITGA6 PPI subnetwork  
PLEC PPI subnetwork  
REACTOME\_P75\_NTR\_RECEPTOR:MEDIATED\_SIGNALLING  
placenta development  
KLKB1 PPI subnetwork  
abnormal kidney physiology  
abnormal keratinocyte morphology  
CGN PPI subnetwork  
abnormal vascular smooth muscle physiology  
INHBA PPI subnetwork  
short tibia  
abnormal long bone epiphyseal plate proliferative zone  
IRS1 PPI subnetwork  
PPP1R12C PPI subnetwork  
thick pulmonary interalveolar septum  
laminin complex  
ZBTB17 PPI subnetwork  
transforming growth factor beta binding  
RAI14 PPI subnetwork  
CTSB PPI subnetwork  
ACVRL1 PPI subnetwork  
increased vasodilation  
lipoprotein particle binding  
protein-lipid complex binding  
postnatal lethality  
positive regulation of protein serine/threonine kinase activity  
SH3BP4 PPI subnetwork  
integrin binding  
PIK3C2B PPI subnetwork  
CORO1B PPI subnetwork  
MYO1G PPI subnetwork  
PIK3C3 PPI subnetwork

**Nominal P value**

1.14E-09  
5.22E-07  
1.27E-06  
2.28E-06  
6.32E-06  
3.18E-05  
9.59E-05  
1.12E-04  
2.32E-04  
2.92E-04  
3.06E-04  
3.62E-04  
3.75E-04  
4.55E-04  
5.46E-04  
6.28E-04  
6.56E-04  
7.26E-04  
8.57E-04  
1.07E-03  
1.08E-03  
1.09E-03  
1.17E-03  
1.45E-03  
1.48E-03  
1.55E-03  
1.79E-03  
1.79E-03  
2.01E-03  
2.21E-03  
2.23E-03  
2.30E-03  
2.33E-03  
2.46E-03  
2.47E-03  
2.60E-03  
2.64E-03  
2.75E-03  
3.45E-03  
3.51E-03  
3.51E-03  
3.53E-03  
3.87E-03  
3.91E-03  
4.08E-03  
4.40E-03  
4.45E-03  
4.65E-03  
4.72E-03

**Original gene set ID**

MP:0005095  
 ENSG00000145715  
 ENSG00000104725  
 KEGG\_PATHWAYS\_IN\_CANCER  
 GO:0008194  
 ENSG00000078747  
 ENSG00000149257  
 ENSG00000114062  
 ENSG00000139144  
 ENSG00000143393  
 ENSG00000148498  
 ENSG00000196455  
 ENSG00000148660  
 ENSG00000034152  
 ENSG00000123124  
 MP:0008813  
 ENSG00000204175  
 GO:0001772  
 REACTOME\_CASPASE:MEDIATED\_CLEAVAGE\_OF\_CYTOSKELETAL\_PROTEINS  
 ENSG00000017427  
 MP:0001954  
 GO:0016051  
 GO:0043406  
 REACTOME\_CELL\_DEATH\_SIGNALLING\_VIA\_NRAGE\_NRF1\_AND\_NADE  
 MP:0000180  
 ENSG00000170759  
 ENSG00000180530  
 ENSG00000138771  
 ENSG00000065882  
 ENSG00000138592  
 MP:0001915  
 ENSG00000131746  
 MP:0004883  
 ENSG00000091073  
 ENSG00000081189  
 ENSG00000154415  
 ENSG00000188313  
 MP:0004933  
 ENSG00000147065  
 ENSG00000165409  
 ENSG00000106992  
 GO:0007292  
 ENSG00000144061  
 MP:0003419  
 ENSG00000110880  
 ENSG00000197879  
 ENSG00000176476  
 ENSG00000176108  
 REACTOME\_INTEGRIN\_CELL\_SURFACE\_INTERACTIONS

**Original gene set description**

decreased T cell proliferation  
 RASA1 PPI subnetwork  
 ENSG00000104725 PPI subnetwork  
 KEGG\_PATHWAYS\_IN\_CANCER  
 UDP-glycosyltransferase activity  
 ITCH PPI subnetwork  
 SERPINH1 PPI subnetwork  
 UBE3A PPI subnetwork  
 PIK3C2G PPI subnetwork  
 PI4KB PPI subnetwork  
 PARD3 PPI subnetwork  
 PIK3R4 PPI subnetwork  
 CAMK2G PPI subnetwork  
 MAP2K3 PPI subnetwork  
 WWP1 PPI subnetwork  
 decreased common myeloid progenitor cell number  
 GPRIN2 PPI subnetwork  
 immunological synapse  
 REACTOME\_CASPASE:MEDIATED\_CLEAVAGE\_OF\_CYTOSKELETAL\_PROTEINS  
 IGF1 PPI subnetwork  
 respiratory distress  
 carbohydrate biosynthetic process  
 positive regulation of MAP kinase activity  
 REACTOME\_CELL\_DEATH\_SIGNALLING\_VIA\_NRAGE\_NRF1\_AND\_NADE  
 abnormal circulating cholesterol level  
 KIF5B PPI subnetwork  
 NRIP1 PPI subnetwork  
 SHROOM3 PPI subnetwork  
 TBC1D1 PPI subnetwork  
 USP8 PPI subnetwork  
 intracranial hemorrhage  
 TNS4 PPI subnetwork  
 abnormal vascular wound healing  
 ENSG00000091073 PPI subnetwork  
 MEF2C PPI subnetwork  
 PPP1R3A PPI subnetwork  
 PLSCR1 PPI subnetwork  
 abnormal epididymis epithelium morphology  
 MSN PPI subnetwork  
 TSHR PPI subnetwork  
 AK1 PPI subnetwork  
 female gamete generation  
 NPHP1 PPI subnetwork  
 delayed endochondral bone ossification  
 CORO1C PPI subnetwork  
 MYO1C PPI subnetwork  
 CCDC101 PPI subnetwork  
 CHMP6 PPI subnetwork  
 REACTOME\_INTEGRIN\_CELL\_SURFACE\_INTERACTIONS

**Nominal P value**

4.84E-03  
 4.96E-03  
 5.08E-03  
 5.17E-03  
 5.46E-03  
 5.48E-03  
 5.79E-03  
 5.85E-03  
 5.85E-03  
 5.87E-03  
 6.00E-03  
 6.19E-03  
 6.48E-03  
 6.58E-03  
 6.95E-03  
 7.37E-03  
 7.39E-03  
 7.40E-03  
 7.46E-03  
 7.51E-03  
 7.56E-03  
 7.65E-03  
 7.65E-03  
 7.67E-03  
 7.71E-03  
 7.79E-03  
 7.86E-03  
 7.89E-03  
 7.97E-03  
 7.99E-03  
 8.00E-03  
 8.01E-03  
 8.15E-03  
 8.22E-03  
 8.24E-03  
 8.33E-03  
 8.55E-03  
 8.61E-03  
 8.64E-03  
 8.64E-03  
 8.69E-03  
 8.93E-03  
 8.95E-03  
 8.98E-03  
 9.04E-03  
 9.22E-03  
 9.31E-03  
 9.44E-03  
 9.47E-03





| Original gene set ID                  | Original gene set description             | Nominal P value |
|---------------------------------------|-------------------------------------------|-----------------|
| GO:0030247                            | polysaccharide binding                    | 0.02            |
| ENSG00000126934                       | MAP2K2 PPI subnetwork                     | 0.02            |
| ENSG00000110395                       | CBL PPI subnetwork                        | 0.02            |
| ENSG00000179151                       | EDC3 PPI subnetwork                       | 0.02            |
| ENSG00000154162                       | CDH12 PPI subnetwork                      | 0.02            |
| ENSG00000184363                       | PKP3 PPI subnetwork                       | 0.02            |
| ENSG00000020577                       | SAMD4A PPI subnetwork                     | 0.02            |
| MP:0004139                            | abnormal gastric parietal cell morphology | 0.02            |
| ENSG00000168476                       | REEP4 PPI subnetwork                      | 0.02            |
| ENSG00000110651                       | CD81 PPI subnetwork                       | 0.02            |
| ENSG00000134184                       | GSTM1 PPI subnetwork                      | 0.02            |
| ENSG00000105376                       | ICAM5 PPI subnetwork                      | 0.02            |
| ENSG00000196954                       | CASP4 PPI subnetwork                      | 0.02            |
| MP:0003704                            | abnormal hair follicle development        | 0.02            |
| ENSG00000050820                       | BCAR1 PPI subnetwork                      | 0.02            |
| ENSG00000151748                       | SAV1 PPI subnetwork                       | 0.02            |
| GO:0003714                            | transcription corepressor activity        | 0.02            |
| ENSG00000115904                       | SOS1 PPI subnetwork                       | 0.02            |
| ENSG00000175793                       | SFN PPI subnetwork                        | 0.02            |
| ENSG00000100345                       | MYH9 PPI subnetwork                       | 0.02            |
| GO:0035091                            | phosphatidylinositol binding              | 0.02            |
| ENSG00000149930                       | TAOK2 PPI subnetwork                      | 0.02            |
| GO:0042054                            | histone methyltransferase activity        | 0.02            |
| MP:0000689                            | abnormal spleen morphology                | 0.02            |
| GO:0001892                            | embryonic placenta development            | 0.02            |
| ENSG00000130294                       | KIF1A PPI subnetwork                      | 0.02            |
| ENSG00000148965                       | SAA4 PPI subnetwork                       | 0.02            |
| GO:0034774                            | secretory granule lumen                   | 0.02            |
| ENSG00000166483                       | WEE1 PPI subnetwork                       | 0.02            |
| ENSG00000110237                       | ARHGEF17 PPI subnetwork                   | 0.02            |
| GO:0032608                            | interferon-beta production                | 0.02            |
| ENSG00000152518                       | ZFP36L2 PPI subnetwork                    | 0.02            |
| MP:0010792                            | abnormal stomach mucosa morphology        | 0.02            |
| ENSG00000189319                       | FAM53B PPI subnetwork                     | 0.02            |
| ENSG00000117461                       | PIK3R3 PPI subnetwork                     | 0.02            |
| GO:0034362                            | low-density lipoprotein particle          | 0.02            |
| ENSG00000134072                       | CAMK1 PPI subnetwork                      | 0.02            |
| ENSG00000163362                       | C1orf106 PPI subnetwork                   | 0.02            |
| MP:0002816                            | colitis                                   | 0.02            |
| GO:0050900                            | leukocyte migration                       | 0.03            |
| GO:0044304                            | main axon                                 | 0.03            |
| ENSG00000071909                       | MYO3B PPI subnetwork                      | 0.03            |
| ENSG00000100714                       | MTHFD1 PPI subnetwork                     | 0.03            |
| ENSG00000198836                       | OPA1 PPI subnetwork                       | 0.03            |
| ENSG00000197442                       | MAP3K5 PPI subnetwork                     | 0.03            |
| ENSG00000206306                       | HLA-DRB1 PPI subnetwork                   | 0.03            |
| ENSG00000206240                       | HLA-DRB1 PPI subnetwork                   | 0.03            |
| GO:0031983                            | vesicle lumen                             | 0.03            |
| KEGG_REGULATION_OF_ACTIN_CYTOSKELETON | KEGG_REGULATION_OF_ACTIN_CYTOSKELETON     | 0.03            |

| Original gene set ID                                       | Original gene set description                                 | Nominal P value |
|------------------------------------------------------------|---------------------------------------------------------------|-----------------|
| GO:0004713                                                 | protein tyrosine kinase activity                              | 0.03            |
| GO:0006953                                                 | acute-phase response                                          | 0.03            |
| GO:0003712                                                 | transcription cofactor activity                               | 0.03            |
| MP:0000295                                                 | trabecula carnea hypoplasia                                   | 0.03            |
| ENSG00000105647                                            | PIK3R2 PPI subnetwork                                         | 0.03            |
| GO:0060205                                                 | cytoplasmic membrane-bounded vesicle lumen                    | 0.03            |
| ENSG00000107566                                            | ERLIN1 PPI subnetwork                                         | 0.03            |
| ENSG00000114270                                            | COL7A1 PPI subnetwork                                         | 0.03            |
| ENSG00000135930                                            | EIF4E2 PPI subnetwork                                         | 0.03            |
| MP:0006413                                                 | increased T cell apoptosis                                    | 0.03            |
| ENSG00000211949                                            | ENSG00000211949 PPI subnetwork                                | 0.03            |
| ENSG00000125731                                            | SH2D3A PPI subnetwork                                         | 0.03            |
| MP:0000414                                                 | alopecia                                                      | 0.03            |
| ENSG00000160691                                            | SHC1 PPI subnetwork                                           | 0.03            |
| MP:0001282                                                 | short vibrissae                                               | 0.03            |
| MP:0003996                                                 | clonic seizures                                               | 0.03            |
| ENSG00000019991                                            | HGF PPI subnetwork                                            | 0.03            |
| MP:0010025                                                 | decreased total body fat amount                               | 0.03            |
| GO:0007568                                                 | aging                                                         | 0.03            |
| GO:0042809                                                 | vitamin D receptor binding                                    | 0.03            |
| MP:0005331                                                 | insulin resistance                                            | 0.03            |
| GO:0045682                                                 | regulation of epidermis development                           | 0.03            |
| MP:0001923                                                 | reduced female fertility                                      | 0.03            |
| MP:0001219                                                 | thick epidermis                                               | 0.03            |
| ENSG00000068615                                            | REEP1 PPI subnetwork                                          | 0.03            |
| ENSG00000171219                                            | CDC42BPG PPI subnetwork                                       | 0.03            |
| MP:0009583                                                 | increased keratinocyte proliferation                          | 0.03            |
| ENSG00000105810                                            | CDK6 PPI subnetwork                                           | 0.03            |
| ENSG00000105662                                            | CRTC1 PPI subnetwork                                          | 0.03            |
| MP:0003957                                                 | abnormal nitric oxide homeostasis                             | 0.03            |
| KEGG_SMALL_CELL_LUNG_CANCER                                | KEGG_SMALL_CELL_LUNG_CANCER                                   | 0.03            |
| GO:0030669                                                 | clathrin-coated endocytic vesicle membrane                    | 0.03            |
| ENSG00000100030                                            | MAPK1 PPI subnetwork                                          | 0.03            |
| GO:0046328                                                 | regulation of JNK cascade                                     | 0.03            |
| GO:0014070                                                 | response to organic cyclic compound                           | 0.03            |
| GO:0033500                                                 | carbohydrate homeostasis                                      | 0.03            |
| GO:0042593                                                 | glucose homeostasis                                           | 0.03            |
| REACTOME_PTM_GAMMA_CARBOXYLATION_HYPUSINE_FORMATION_AND_AF | REACTOME_PTM_GAMMA_CARBOXYLATION_HYPUSINE_FORMATION_AND_ARYLS | 0.03            |
| REACTOME_REGULATION_OF_SIGNALING_BY_CBL                    | REACTOME_REGULATION_OF_SIGNALING_BY_CBL                       | 0.03            |
| MP:0002418                                                 | increased susceptibility to viral infection                   | 0.03            |
| MP:0003721                                                 | increased tumor growth/size                                   | 0.03            |
| GO:0071845                                                 | cellular component disassembly at cellular level              | 0.03            |
| GO:0030518                                                 | intracellular steroid hormone receptor signaling pathway      | 0.03            |
| ENSG00000116824                                            | CD2 PPI subnetwork                                            | 0.03            |
| MP:0003566                                                 | abnormal cell adhesion                                        | 0.03            |
| GO:0034061                                                 | DNA polymerase activity                                       | 0.03            |
| ENSG00000141968                                            | VAV1 PPI subnetwork                                           | 0.03            |
| GO:0001701                                                 | in utero embryonic development                                | 0.03            |
| MP:0000166                                                 | abnormal chondrocyte morphology                               | 0.03            |

| Original gene set ID             | Original gene set description                               | Nominal P value |
|----------------------------------|-------------------------------------------------------------|-----------------|
| MP:0003400                       | kinked neural tube                                          | 0.03            |
| GO:0000790                       | nuclear chromatin                                           | 0.03            |
| ENSG000000197102                 | DYNC1H1 PPI subnetwork                                      | 0.03            |
| GO:0043566                       | structure-specific DNA binding                              | 0.03            |
| ENSG00000075413                  | MARK3 PPI subnetwork                                        | 0.03            |
| GO:0000271                       | polysaccharide biosynthetic process                         | 0.03            |
| REACTOME_CELL:CELL_COMMUNICATION | REACTOME_CELL:CELL_COMMUNICATION                            | 0.03            |
| MP:0000410                       | waved hair                                                  | 0.03            |
| ENSG000000154556                 | SORBS2 PPI subnetwork                                       | 0.03            |
| ENSG000000104368                 | PLAT PPI subnetwork                                         | 0.03            |
| GO:0043123                       | positive regulation of I-kappaB kinase/NF-kappaB cascade    | 0.03            |
| ENSG000000156127                 | BATF PPI subnetwork                                         | 0.03            |
| ENSG000000132470                 | ITGB4 PPI subnetwork                                        | 0.03            |
| GO:0038024                       | cargo receptor activity                                     | 0.03            |
| ENSG000000100014                 | SPECC1L PPI subnetwork                                      | 0.03            |
| ENSG000000163083                 | INHBB PPI subnetwork                                        | 0.03            |
| ENSG000000110931                 | CAMKK2 PPI subnetwork                                       | 0.03            |
| MP:0002088                       | abnormal embryonic growth/weight/body size                  | 0.03            |
| GO:0016571                       | histone methylation                                         | 0.03            |
| GO:0033559                       | unsaturated fatty acid metabolic process                    | 0.03            |
| MP:0005350                       | increased susceptibility to autoimmune disorder             | 0.03            |
| ENSG000000136111                 | TBC1D4 PPI subnetwork                                       | 0.03            |
| REACTOME_NEPHRIN_INTERACTIONS    | REACTOME_NEPHRIN_INTERACTIONS                               | 0.03            |
| ENSG000000182195                 | LDOC1 PPI subnetwork                                        | 0.03            |
| ENSG000000123685                 | BATF3 PPI subnetwork                                        | 0.03            |
| ENSG000000215699                 | ENSG000000215699 PPI subnetwork                             | 0.03            |
| GO:0005720                       | nuclear heterochromatin                                     | 0.03            |
| ENSG000000092969                 | TGFB2 PPI subnetwork                                        | 0.03            |
| KEGG_ECM_RECEPTOR_INTERACTION    | KEGG_ECM_RECEPTOR_INTERACTION                               | 0.03            |
| MP:0001201                       | translucent skin                                            | 0.03            |
| GO:0016278                       | lysine N-methyltransferase activity                         | 0.03            |
| GO:0016279                       | protein-lysine N-methyltransferase activity                 | 0.03            |
| ENSG000000196586                 | MYO6 PPI subnetwork                                         | 0.03            |
| GO:0004702                       | receptor signaling protein serine/threonine kinase activity | 0.03            |
| ENSG000000072518                 | MARK2 PPI subnetwork                                        | 0.03            |
| ENSG000000165025                 | SYK PPI subnetwork                                          | 0.03            |
| MP:0002109                       | abnormal limb morphology                                    | 0.03            |
| ENSG000000157764                 | BRAF PPI subnetwork                                         | 0.03            |
| ENSG000000152256                 | PDK1 PPI subnetwork                                         | 0.03            |
| ENSG000000065618                 | COL17A1 PPI subnetwork                                      | 0.04            |
| ENSG000000169220                 | RGS14 PPI subnetwork                                        | 0.04            |
| ENSG000000100311                 | PDGFB PPI subnetwork                                        | 0.04            |
| ENSG000000134202                 | GSTM3 PPI subnetwork                                        | 0.04            |
| ENSG000000142515                 | KLK3 PPI subnetwork                                         | 0.04            |
| MP:0002619                       | abnormal lymphocyte morphology                              | 0.04            |
| ENSG000000161395                 | PGAP3 PPI subnetwork                                        | 0.04            |
| ENSG000000145431                 | PDGFC PPI subnetwork                                        | 0.04            |
| ENSG000000170962                 | PDGFD PPI subnetwork                                        | 0.04            |
| ENSG000000153879                 | CEBPG PPI subnetwork                                        | 0.04            |





| Original gene set ID                                       | Original gene set description                                        | Nominal P value |
|------------------------------------------------------------|----------------------------------------------------------------------|-----------------|
| GO:0046456                                                 | icosanoid biosynthetic process                                       | 0.04            |
| ENSG00000132964                                            | CDK8 PPI subnetwork                                                  | 0.04            |
| MP:0008688                                                 | decreased interleukin-2 secretion                                    | 0.04            |
| ENSG00000196218                                            | RYR1 PPI subnetwork                                                  | 0.04            |
| MP:0004770                                                 | abnormal synaptic vesicle recycling                                  | 0.04            |
| ENSG00000121879                                            | PIK3CA PPI subnetwork                                                | 0.04            |
| ENSG00000196735                                            | HLA-DQA1 PPI subnetwork                                              | 0.04            |
| MP:0009355                                                 | increased liver triglyceride level                                   | 0.04            |
| MP:0009399                                                 | increased skeletal muscle fiber size                                 | 0.04            |
| ENSG00000160678                                            | S100A1 PPI subnetwork                                                | 0.04            |
| ENSG00000064999                                            | ANKS1A PPI subnetwork                                                | 0.04            |
| ENSG00000173327                                            | MAP3K11 PPI subnetwork                                               | 0.04            |
| GO:0051183                                                 | vitamin transporter activity                                         | 0.04            |
| GO:0006690                                                 | icosanoid metabolic process                                          | 0.04            |
| ENSG00000134363                                            | FST PPI subnetwork                                                   | 0.04            |
| GO:0060053                                                 | neurofilament cytoskeleton                                           | 0.04            |
| ENSG00000151914                                            | DST PPI subnetwork                                                   | 0.04            |
| ENSG00000189079                                            | ARID2 PPI subnetwork                                                 | 0.04            |
| ENSG00000065559                                            | MAP2K4 PPI subnetwork                                                | 0.05            |
| ENSG00000120709                                            | FAM53C PPI subnetwork                                                | 0.05            |
| MP:0002110                                                 | abnormal digit morphology                                            | 0.05            |
| GO:0005976                                                 | polysaccharide metabolic process                                     | 0.05            |
| ENSG00000054523                                            | KIF1B PPI subnetwork                                                 | 0.05            |
| ENSG00000100906                                            | NFKBIA PPI subnetwork                                                | 0.05            |
| ENSG00000136518                                            | ACTL6A PPI subnetwork                                                | 0.05            |
| GO:0004709                                                 | MAP kinase kinase kinase activity                                    | 0.05            |
| GO:0060711                                                 | labyrinthine layer development                                       | 0.05            |
| KEGG_CIRCADIAN_RHYTHM_MAMMAL                               | KEGG_CIRCADIAN_RHYTHM_MAMMAL                                         | 0.05            |
| REACTOME_CLASSICAL_ANTIBODY:MEDIATED_COMPLEMENT_ACTIVATION | REACTOME_CLASSICAL_ANTIBODY:MEDIATED_COMPLEMENT_ACTIVATION           | 0.05            |
| ENSG00000211979                                            | ENSG00000211979 PPI subnetwork                                       | 0.05            |
| ENSG00000211973                                            | ENSG00000211973 PPI subnetwork                                       | 0.05            |
| ENSG00000172534                                            | HCFC1 PPI subnetwork                                                 | 0.05            |
| ENSG00000136270                                            | TBRG4 PPI subnetwork                                                 | 0.05            |
| GO:0032648                                                 | regulation of interferon-beta production                             | 0.05            |
| GO:0034375                                                 | high-density lipoprotein particle remodeling                         | 0.05            |
| ENSG00000185811                                            | IKZF1 PPI subnetwork                                                 | 0.05            |
| ENSG00000198802                                            | ENSG00000198802 PPI subnetwork                                       | 0.05            |
| MP:0006262                                                 | testis tumor                                                         | 0.05            |
| ENSG00000171992                                            | SYNPO PPI subnetwork                                                 | 0.05            |
| ENSG00000213341                                            | CHUK PPI subnetwork                                                  | 0.05            |
| ENSG00000175197                                            | DDIT3 PPI subnetwork                                                 | 0.05            |
| MP:0005150                                                 | cachexia                                                             | 0.05            |
| GO:0043122                                                 | regulation of I-kappaB kinase/NF-kappaB cascade                      | 0.05            |
| GO:0097006                                                 | regulation of plasma lipoprotein particle levels                     | 0.05            |
| ENSG00000162772                                            | ATF3 PPI subnetwork                                                  | 0.05            |
| GO:0000122                                                 | negative regulation of transcription from RNA polymerase II promoter | 0.05            |
| GO:0005858                                                 | axonemal dynein complex                                              | 0.05            |
| ENSG00000051382                                            | PIK3CB PPI subnetwork                                                | 0.05            |
| GO:0043405                                                 | regulation of MAP kinase activity                                    | 0.05            |

**Original gene set ID****Original gene set description****Nominal P value**

|                                          |                                                                                         |      |
|------------------------------------------|-----------------------------------------------------------------------------------------|------|
| MP:0008722                               | abnormal chemokine secretion                                                            | 0.05 |
| KEGG_CHRONIC_MYELOID_LEUKEMIA            | KEGG_CHRONIC_MYELOID_LEUKEMIA                                                           | 0.05 |
| REACTOME_REGULATED_PROTEOLYSIS_OF_P75NTR | REACTOME_REGULATED_PROTEOLYSIS_OF_P75NTR                                                | 0.05 |
| GO:0043588                               | skin development                                                                        | 0.05 |
| GO:0010627                               | regulation of intracellular protein kinase cascade                                      | 0.05 |
| GO:0044212                               | transcription regulatory region DNA binding                                             | 0.05 |
| GO:0030027                               | lamellipodium                                                                           | 0.05 |
| ENSG00000105976                          | MET PPI subnetwork                                                                      | 0.05 |
| MP:0002792                               | abnormal retinal vasculature morphology                                                 | 0.05 |
| MP:0000069                               | kyphoscoliosis                                                                          | 0.05 |
| GO:0034339                               | regulation of transcription from RNA polymerase II promoter by nuclear hormone receptor | 0.05 |
| ENSG00000141551                          | CSNK1D PPI subnetwork                                                                   | 0.05 |
| MP:0005108                               | abnormal ulna morphology                                                                | 0.05 |
| MP:0002419                               | abnormal innate immunity                                                                | 0.05 |
| GO:0016757                               | transferase activity, transferring glycosyl groups                                      | 0.05 |
| ENSG00000161800                          | RACGAP1 PPI subnetwork                                                                  | 0.05 |
| MP:0006387                               | abnormal T cell number                                                                  | 0.05 |
| GO:0005089                               | Rho guanyl-nucleotide exchange factor activity                                          | 0.05 |
| ENSG00000117984                          | CTSD PPI subnetwork                                                                     | 0.05 |
| ENSG00000105971                          | CAV2 PPI subnetwork                                                                     | 0.05 |
| ENSG00000115085                          | ZAP70 PPI subnetwork                                                                    | 0.05 |
| MP:0004609                               | vertebral fusion                                                                        | 0.05 |
| ENSG00000135862                          | LAMC1 PPI subnetwork                                                                    | 0.05 |
| MP:0003449                               | abnormal intestinal goblet cell morphology                                              | 0.05 |
| MP:0002687                               | oligozoospermia                                                                         | 0.05 |
| MP:0000714                               | increased thymocyte number                                                              | 0.05 |
| ENSG00000133030                          | MPRIP PPI subnetwork                                                                    | 0.05 |
| ENSG00000079841                          | RIMS1 PPI subnetwork                                                                    | 0.05 |
| ENSG00000130638                          | ATXN10 PPI subnetwork                                                                   | 0.05 |
| MP:0002656                               | abnormal keratinocyte differentiation                                                   | 0.05 |
| ENSG00000129691                          | ASH2L PPI subnetwork                                                                    | 0.05 |
| MP:0002650                               | abnormal ameloblast morphology                                                          | 0.05 |
| ENSG00000135503                          | ACVR1B PPI subnetwork                                                                   | 0.05 |
| GO:0004715                               | non-membrane spanning protein tyrosine kinase activity                                  | 0.05 |
| ENSG00000001497                          | LAS1L PPI subnetwork                                                                    | 0.05 |
| GO:0018024                               | histone-lysine N-methyltransferase activity                                             | 0.05 |
| GO:0000792                               | heterochromatin                                                                         | 0.05 |
| ENSG00000111961                          | SASH1 PPI subnetwork                                                                    | 0.05 |
| MP:0008840                               | abnormal spike wave discharge                                                           | 0.05 |
| ENSG00000139514                          | SLC7A1 PPI subnetwork                                                                   | 0.05 |
| GO:0007249                               | I-kappaB kinase/NF-kappaB cascade                                                       | 0.05 |
| MP:0009886                               | failure of palatal shelf elevation                                                      | 0.06 |
| ENSG00000144668                          | ITGA9 PPI subnetwork                                                                    | 0.06 |
| MP:0001798                               | impaired macrophage phagocytosis                                                        | 0.06 |
| MP:0004148                               | increased compact bone thickness                                                        | 0.06 |
| GO:0034637                               | cellular carbohydrate biosynthetic process                                              | 0.06 |
| REACTOME_PLATELET_SENSITIZATION_BY_LDL   | REACTOME_PLATELET_SENSITIZATION_BY_LDL                                                  | 0.06 |
| GO:0008170                               | N-methyltransferase activity                                                            | 0.06 |
| GO:0046890                               | regulation of lipid biosynthetic process                                                | 0.06 |





| Original gene set ID                               | Original gene set description                               | Nominal P value |
|----------------------------------------------------|-------------------------------------------------------------|-----------------|
| MP:0001846                                         | increased inflammatory response                             | 0.07            |
| MP:0005178                                         | increased circulating cholesterol leve                      | 0.07            |
| ENSG000000165219                                   | GAPVD1 PPI subnetwork                                       | 0.07            |
| ENSG000000104695                                   | PPP2CB PPI subnetwork                                       | 0.07            |
| MP:0001539                                         | decreased caudal vertebrae number                           | 0.07            |
| REACTOME_BMAL1CLOCKNPAS2_ACTIVATES_GENE_EXPRESSION | REACTOME_BMAL1CLOCKNPAS2_ACTIVATES_GENE_EXPRESSION          | 0.07            |
| ENSG000000164597                                   | COG5 PPI subnetwork                                         | 0.07            |
| ENSG000000122679                                   | RAMP3 PPI subnetwork                                        | 0.07            |
| MP:0008563                                         | decreased interferon-alpha secretion                        | 0.07            |
| ENSG000000203747                                   | FCGR3A PPI subnetwork                                       | 0.07            |
| ENSG000000129250                                   | KIF1C PPI subnetwork                                        | 0.07            |
| MP:0005018                                         | decreased T cell number                                     | 0.07            |
| REACTOME_TRAF6_MEDIATED_NF:KB_ACTIVATION           | REACTOME_TRAF6_MEDIATED_NF:KB_ACTIVATION                    | 0.07            |
| ENSG000000144021                                   | CIAO1 PPI subnetwork                                        | 0.07            |
| ENSG000000184967                                   | NOC4L PPI subnetwork                                        | 0.07            |
| ENSG000000105245                                   | NUMBL PPI subnetwork                                        | 0.07            |
| MP:0002401                                         | abnormal lymphopoiesis                                      | 0.07            |
| REACTOME_SIGNALLING_BY_NGF                         | REACTOME_SIGNALLING_BY_NGF                                  | 0.07            |
| MP:0001973                                         | increased thermal nociceptive threshold                     | 0.07            |
| GO:0033077                                         | T cell differentiation in thymus                            | 0.07            |
| MP:0003723                                         | abnormal long bone morphology                               | 0.07            |
| ENSG000000133997                                   | MED6 PPI subnetwork                                         | 0.07            |
| ENSG000000007968                                   | E2F2 PPI subnetwork                                         | 0.07            |
| GO:0030286                                         | dynein complex                                              | 0.07            |
| GO:0002526                                         | acute inflammatory response                                 | 0.07            |
| ENSG000000182901                                   | RG57 PPI subnetwork                                         | 0.07            |
| ENSG000000214485                                   | ENSG000000214485 PPI subnetwork                             | 0.07            |
| GO:0035097                                         | histone methyltransferase complex                           | 0.07            |
| GO:0034708                                         | methyltransferase complex                                   | 0.07            |
| ENSG000000171608                                   | PIK3CD PPI subnetwork                                       | 0.07            |
| ENSG000000149923                                   | PPP4C PPI subnetwork                                        | 0.07            |
| MP:0001922                                         | reduced male fertility                                      | 0.07            |
| GO:0005416                                         | cation:amino acid symporter activity                        | 0.07            |
| MP:0001129                                         | impaired ovarian folliculogenesis                           | 0.07            |
| MP:0003231                                         | abnormal placenta vasculature                               | 0.07            |
| ENSG000000055332                                   | EIF2AK2 PPI subnetwork                                      | 0.07            |
| GO:0015849                                         | organic acid transport                                      | 0.07            |
| GO:0048011                                         | nerve growth factor receptor signaling pathway              | 0.07            |
| GO:0005605                                         | basal lamina                                                | 0.07            |
| MP:0001858                                         | intestinal inflammation                                     | 0.07            |
| GO:0003690                                         | double-stranded DNA binding                                 | 0.07            |
| ENSG000000180879                                   | SSR4 PPI subnetwork                                         | 0.07            |
| REACTOME_OTHER_SEMAPHORIN_INTERACTIONS             | REACTOME_OTHER_SEMAPHORIN_INTERACTIONS                      | 0.07            |
| GO:0043408                                         | regulation of MAPK cascade                                  | 0.07            |
| MP:0008479                                         | decreased spleen white pulp amount                          | 0.07            |
| ENSG000000185963                                   | BICD2 PPI subnetwork                                        | 0.07            |
| GO:0046969                                         | NAD-dependent histone deacetylase activity (H3-K9 specific) | 0.07            |
| GO:0032129                                         | histone deacetylase activity (H3-K9 specific)               | 0.07            |
| ENSG000000105723                                   | GSK3A PPI subnetwork                                        | 0.07            |



| Original gene set ID                                                   | Original gene set description                                          | Nominal P value |
|------------------------------------------------------------------------|------------------------------------------------------------------------|-----------------|
| MP:0005439                                                             | decreased glycogen level                                               | 0.08            |
| MP:0000493                                                             | rectal prolapse                                                        | 0.08            |
| REACTOME_CIRCADIAN_CLOCK                                               | REACTOME_CIRCADIAN_CLOCK                                               | 0.08            |
| ENSG00000182511                                                        | FES PPI subnetwork                                                     | 0.08            |
| ENSG00000065054                                                        | SLC9A3R2 PPI subnetwork                                                | 0.08            |
| REACTOME_TRANSCRIPTIONAL_REGULATION_OF_WHITE_ADIPOCYTE_DIFFERENTIATION | REACTOME_TRANSCRIPTIONAL_REGULATION_OF_WHITE_ADIPOCYTE_DIFFERENTIATION | 0.08            |
| KEGG_DORSO_VENTRAL_AXIS_FORMATION                                      | KEGG_DORSO_VENTRAL_AXIS_FORMATION                                      | 0.08            |
| ENSG00000158402                                                        | CDC25C PPI subnetwork                                                  | 0.08            |
| ENSG00000107186                                                        | MPDZ PPI subnetwork                                                    | 0.08            |
| ENSG00000117395                                                        | EBNA1BP2 PPI subnetwork                                                | 0.08            |
| GO:0032606                                                             | type I interferon production                                           | 0.08            |
| ENSG00000101057                                                        | MYBL2 PPI subnetwork                                                   | 0.08            |
| ENSG00000163629                                                        | PTPN13 PPI subnetwork                                                  | 0.08            |
| REACTOME_METABOLISM_OF_WATER:SOLUBLE_VITAMINS_AND_COFACTORS            | REACTOME_METABOLISM_OF_WATER:SOLUBLE_VITAMINS_AND_COFACTORS            | 0.08            |
| REACTOME_METABOLISM_OF_VITAMINS_AND_COFACTORS                          | REACTOME_METABOLISM_OF_VITAMINS_AND_COFACTORS                          | 0.08            |
| ENSG00000133895                                                        | MEN1 PPI subnetwork                                                    | 0.08            |
| ENSG00000197451                                                        | HNRNPAB PPI subnetwork                                                 | 0.08            |
| GO:0043029                                                             | T cell homeostasis                                                     | 0.08            |
| GO:0031252                                                             | cell leading edge                                                      | 0.08            |
| GO:0009101                                                             | glycoprotein biosynthetic process                                      | 0.08            |
| MP:0004616                                                             | lumbar vertebral transformation                                        | 0.08            |
| MP:0003892                                                             | abnormal gastric gland morphology                                      | 0.08            |
| MP:0002740                                                             | heart hypoplasia                                                       | 0.08            |
| MP:0000133                                                             | abnormal long bone metaphysis morphology                               | 0.08            |
| ENSG00000140009                                                        | ESR2 PPI subnetwork                                                    | 0.08            |
| KEGG_PANCREATIC_CANCER                                                 | KEGG_PANCREATIC_CANCER                                                 | 0.08            |
| MP:0001209                                                             | spontaneous skin ulceration                                            | 0.08            |
| MP:0005017                                                             | decreased B cell number                                                | 0.08            |
| ENSG00000107262                                                        | BAG1 PPI subnetwork                                                    | 0.08            |
| ENSG00000118260                                                        | CREB1 PPI subnetwork                                                   | 0.08            |
| ENSG00000169967                                                        | MAP3K2 PPI subnetwork                                                  | 0.08            |
| GO:0050840                                                             | extracellular matrix binding                                           | 0.08            |
| ENSG00000198286                                                        | CARD11 PPI subnetwork                                                  | 0.08            |
| GO:0005085                                                             | guanyl-nucleotide exchange factor activity                             | 0.08            |
| ENSG00000126001                                                        | CEP250 PPI subnetwork                                                  | 0.08            |
| ENSG00000203879                                                        | GDI1 PPI subnetwork                                                    | 0.08            |
| GO:0046970                                                             | NAD-dependent histone deacetylase activity (H4-K16 specific)           | 0.08            |
| GO:0034739                                                             | histone deacetylase activity (H4-K16 specific)                         | 0.08            |
| GO:0031078                                                             | histone deacetylase activity (H3-K14 specific)                         | 0.08            |
| GO:0032041                                                             | NAD-dependent histone deacetylase activity (H3-K14 specific)           | 0.08            |
| REACTOME_INTERFERON_ALPHABETA_SIGNALING                                | REACTOME_INTERFERON_ALPHABETA_SIGNALING                                | 0.08            |
| MP:0000951                                                             | sporadic seizures                                                      | 0.08            |
| ENSG00000119401                                                        | TRIM32 PPI subnetwork                                                  | 0.08            |
| ENSG00000080815                                                        | PSEN1 PPI subnetwork                                                   | 0.08            |
| GO:0033674                                                             | positive regulation of kinase activity                                 | 0.08            |
| ENSG00000102898                                                        | NUTF2 PPI subnetwork                                                   | 0.08            |
| GO:0008378                                                             | galactosyltransferase activity                                         | 0.08            |
| MP:0000751                                                             | myopathy                                                               | 0.08            |
| ENSG00000119630                                                        | PGF PPI subnetwork                                                     | 0.08            |

| Original gene set ID                                              | Original gene set description                                     | Nominal P value |
|-------------------------------------------------------------------|-------------------------------------------------------------------|-----------------|
| REACTOME_N:GLYCAN_TRIMMING_IN_THE_ER_AND_CALNEXINCALRETICULIN_CYC | REACTOME_N:GLYCAN_TRIMMING_IN_THE_ER_AND_CALNEXINCALRETICULIN_CYC | 0.08            |
| GO:0030728                                                        | ovulation                                                         | 0.08            |
| GO:0002577                                                        | regulation of antigen processing and presentation                 | 0.08            |
| GO:0031100                                                        | organ regeneration                                                | 0.08            |
| ENSG00000063046                                                   | EIF4B PPI subnetwork                                              | 0.08            |
| REACTOME_IMMUNOREGULATORY_INTERACTIONS_BETWEEN_A_LYMPHOID_AND_A   | REACTOME_IMMUNOREGULATORY_INTERACTIONS_BETWEEN_A_LYMPHOID_AND_A   | 0.08            |
| MP:0001745                                                        | increased circulating corticosterone leve                         | 0.08            |
| MP:0003087                                                        | absent allantois                                                  | 0.08            |
| ENSG00000198959                                                   | TGM2 PPI subnetwork                                               | 0.08            |
| ENSG00000154380                                                   | ENAH PPI subnetwork                                               | 0.08            |
| GO:0051347                                                        | positive regulation of transferase activity                       | 0.08            |
| ENSG00000099308                                                   | MAST3 PPI subnetwork                                              | 0.08            |
| GO:0035250                                                        | UDP-galactosyltransferase activity                                | 0.08            |
| ENSG00000129682                                                   | FGF13 PPI subnetwork                                              | 0.08            |
| MP:0008577                                                        | increased circulating interferon-gamma level                      | 0.08            |
| ENSG00000170579                                                   | DLGAP1 PPI subnetwork                                             | 0.08            |
| GO:0005539                                                        | glycosaminoglycan binding                                         | 0.08            |
| MP:0005090                                                        | increased double-negative T cell number                           | 0.08            |
| REACTOME_PEPTIDE_HORMONE_BIOSYNTHESIS                             | REACTOME_PEPTIDE_HORMONE_BIOSYNTHESIS                             | 0.08            |
| GO:0071900                                                        | regulation of protein serine/threonine kinase activity            | 0.09            |
| GO:0045723                                                        | positive regulation of fatty acid biosynthetic process            | 0.09            |
| GO:0016298                                                        | lipase activity                                                   | 0.09            |
| GO:0035770                                                        | ribonucleoprotein granule                                         | 0.09            |
| ENSG00000085721                                                   | RRN3 PPI subnetwork                                               | 0.09            |
| ENSG00000136250                                                   | AOAH PPI subnetwork                                               | 0.09            |
| ENSG00000081237                                                   | PTPRC PPI subnetwork                                              | 0.09            |
| ENSG00000143621                                                   | ILF2 PPI subnetwork                                               | 0.09            |
| GO:0031098                                                        | stress-activated protein kinase signaling cascade                 | 0.09            |
| KEGG_STEROID_BIOSYNTHESIS                                         | KEGG_STEROID_BIOSYNTHESIS                                         | 0.09            |
| GO:0015936                                                        | coenzyme A metabolic process                                      | 0.09            |
| ENSG00000212981                                                   | ENSG00000212981 PPI subnetwork                                    | 0.09            |
| MP:0008750                                                        | abnormal interferon level                                         | 0.09            |
| ENSG00000206297                                                   | TAP1 PPI subnetwork                                               | 0.09            |
| ENSG00000206233                                                   | ENSG00000206233 PPI subnetwork                                    | 0.09            |
| ENSG00000168394                                                   | TAP1 PPI subnetwork                                               | 0.09            |
| GO:0031929                                                        | TOR signaling cascade                                             | 0.09            |
| ENSG00000068305                                                   | MEF2A PPI subnetwork                                              | 0.09            |
| ENSG00000090339                                                   | ICAM1 PPI subnetwork                                              | 0.09            |
| ENSG00000049618                                                   | ARID1B PPI subnetwork                                             | 0.09            |
| MP:0002665                                                        | decreased circulating corticosterone leve                         | 0.09            |
| GO:0005796                                                        | Golgi lumen                                                       | 0.09            |
| REACTOME_INITIAL_TRIGGERING_OF_COMPLEMENT                         | REACTOME_INITIAL_TRIGGERING_OF_COMPLEMENT                         | 0.09            |
| GO:0006305                                                        | DNA alkylation                                                    | 0.09            |
| GO:0006306                                                        | DNA methylation                                                   | 0.09            |
| GO:0045061                                                        | thymic T cell selection                                           | 0.09            |
| ENSG00000198734                                                   | F5 PPI subnetwork                                                 | 0.09            |
| ENSG00000130762                                                   | ARHGEF16 PPI subnetwork                                           | 0.09            |
| ENSG00000166913                                                   | YWHAB PPI subnetwork                                              | 0.09            |
| ENSG00000099917                                                   | MED15 PPI subnetwork                                              | 0.09            |



| Original gene set ID | Original gene set description                               | Nominal P value |
|----------------------|-------------------------------------------------------------|-----------------|
| GO:0042755           | eating behavior                                             | 0.09            |
| GO:0045334           | clathrin-coated endocytic vesicle                           | 0.09            |
| ENSG000000133104     | SPG20 PPI subnetwork                                        | 0.09            |
| GO:0008213           | protein alkylation                                          | 0.09            |
| GO:0006479           | protein methylation                                         | 0.09            |
| GO:0010740           | positive regulation of intracellular protein kinase cascade | 0.09            |
| GO:0008584           | male gonad development                                      | 0.09            |
| MP:0002722           | abnormal immune system organ morphology                     | 0.09            |
| ENSG000000120509     | PDZD11 PPI subnetwork                                       | 0.09            |
| ENSG000000204361     | FAM55B PPI subnetwork                                       | 0.09            |
| MP:0001655           | multifocal hepatic necrosis                                 | 0.09            |
| MP:0004374           | bowed radius                                                | 0.09            |
| MP:0000764           | abnormal tongue epithelium morphology                       | 0.09            |
| ENSG000000185634     | SHC4 PPI subnetwork                                         | 0.09            |
| ENSG000000140368     | PSTPIP1 PPI subnetwork                                      | 0.09            |
| GO:0008610           | lipid biosynthetic process                                  | 0.09            |
| ENSG000000109471     | IL2 PPI subnetwork                                          | 0.09            |
| GO:0005637           | nuclear inner membrane                                      | 0.09            |
| ENSG000000169131     | ZNF354A PPI subnetwork                                      | 0.09            |
| GO:0046943           | carboxylic acid transmembrane transporter activity          | 0.09            |
| MP:0002086           | abnormal extraembryonic tissue morphology                   | 0.09            |
| MP:0005325           | abnormal renal glomerulus morphology                        | 0.09            |
| GO:0042110           | T cell activation                                           | 0.09            |
| ENSG000000107338     | SHB PPI subnetwork                                          | 0.09            |
| GO:0045860           | positive regulation of protein kinase activity              | 0.09            |
| GO:0002920           | regulation of humoral immune response                       | 0.09            |
| ENSG000000106052     | TAX1BP1 PPI subnetwork                                      | 0.09            |
| ENSG000000118690     | ARMC2 PPI subnetwork                                        | 0.09            |
| ENSG000000142273     | CBLC PPI subnetwork                                         | 0.09            |
| MP:0001236           | abnormal epidermis stratum spinosum morphology              | 0.09            |
| GO:0009100           | glycoprotein metabolic process                              | 0.09            |
| ENSG000000056972     | TRAF3IP2 PPI subnetwork                                     | 0.09            |
| MP:0004852           | decreased testis weight                                     | 0.09            |
| GO:0044272           | sulfur compound biosynthetic process                        | 0.09            |
| GO:0042605           | peptide antigen binding                                     | 0.09            |
| GO:0000187           | activation of MAPK activity                                 | 0.09            |
| GO:0006029           | proteoglycan metabolic process                              | 0.09            |
| GO:0002080           | acrosomal membrane                                          | 0.09            |
| GO:0031293           | membrane protein intracellular domain proteolysis           | 0.09            |
| ENSG000000110092     | CCND1 PPI subnetwork                                        | 0.09            |
| MP:0000473           | abnormal stomach glandular epithelium morphology            | 0.09            |
| GO:0031258           | lamellipodium membrane                                      | 0.09            |
| GO:0006694           | steroid biosynthetic process                                | 0.09            |
| MP:0000592           | short tail                                                  | 0.09            |
| GO:0010608           | posttranscriptional regulation of gene expression           | 0.09            |
| ENSG000000198911     | SREBF2 PPI subnetwork                                       | 0.09            |
| GO:0045446           | endothelial cell differentiation                            | 0.09            |
| GO:0005035           | death receptor activity                                     | 0.09            |
| GO:0051346           | negative regulation of hydrolase activity                   | 0.09            |

| Original gene set ID                                          | Original gene set description                                 | Nominal P value |
|---------------------------------------------------------------|---------------------------------------------------------------|-----------------|
| ENSG00000136169                                               | SETDB2 PPI subnetwork                                         | 0.09            |
| GO:0002260                                                    | lymphocyte homeostasis                                        | 0.09            |
| MP:0003339                                                    | decreased pancreatic beta cell number                         | 0.09            |
| REACTOME_COMPLEMENT_CASCADE                                   | REACTOME_COMPLEMENT_CASCADE                                   | 0.09            |
| MP:0001792                                                    | impaired wound healing                                        | 0.09            |
| GO:0008406                                                    | gonad development                                             | 0.09            |
| ENSG00000171720                                               | HDAC3 PPI subnetwork                                          | 0.09            |
| GO:0004620                                                    | phospholipase activity                                        | 0.09            |
| ENSG00000101266                                               | CSNK2A1 PPI subnetwork                                        | 0.09            |
| ENSG00000067191                                               | CACNB1 PPI subnetwork                                         | 0.09            |
| KEGG_FC_GAMMA_R_MEDIATED_PHAGOCYTOSIS                         | KEGG_FC_GAMMA_R_MEDIATED_PHAGOCYTOSIS                         | 0.09            |
| REACTOME_CHYLOMICRON:MEDIATED_LIPID_TRANSPORT                 | REACTOME_CHYLOMICRON:MEDIATED_LIPID_TRANSPORT                 | 0.09            |
| MP:0002780                                                    | decreased circulating testosterone leve                       | 0.09            |
| MP:0001216                                                    | abnormal epidermal layer morphology                           | 0.09            |
| GO:0045058                                                    | T cell selection                                              | 0.09            |
| ENSG00000215440                                               | NPEPL1 PPI subnetwork                                         | 0.09            |
| GO:0007565                                                    | female pregnancy                                              | 0.09            |
| GO:0010638                                                    | positive regulation of organelle organization                 | 0.09            |
| MP:0001147                                                    | small testis                                                  | 0.1             |
| ENSG00000101210                                               | EEF1A2 PPI subnetwork                                         | 0.1             |
| MP:0005294                                                    | abnormal heart ventricle morphology                           | 0.1             |
| GO:0030323                                                    | respiratory tube development                                  | 0.1             |
| GO:0005542                                                    | folic acid binding                                            | 0.1             |
| ENSG00000141646                                               | SMAD4 PPI subnetwork                                          | 0.1             |
| ENSG00000100888                                               | CHD8 PPI subnetwork                                           | 0.1             |
| ENSG00000072062                                               | PRKACA PPI subnetwork                                         | 0.1             |
| ENSG00000134853                                               | PDGFRA PPI subnetwork                                         | 0.1             |
| ENSG00000135069                                               | PSAT1 PPI subnetwork                                          | 0.1             |
| GO:0000118                                                    | histone deacetylase complex                                   | 0.1             |
| GO:0071887                                                    | leukocyte apoptotic process                                   | 0.1             |
| MP:0008271                                                    | abnormal bone ossification                                    | 0.1             |
| GO:0008201                                                    | heparin binding                                               | 0.1             |
| ENSG00000124222                                               | STX16 PPI subnetwork                                          | 0.1             |
| GO:0030299                                                    | intestinal cholesterol absorption                             | 0.1             |
| ENSG00000122194                                               | PLG PPI subnetwork                                            | 0.1             |
| MP:0001951                                                    | abnormal breathing pattern                                    | 0.1             |
| ENSG00000105369                                               | CD79A PPI subnetwork                                          | 0.1             |
| ENSG00000170889                                               | RPS9 PPI subnetwork                                           | 0.1             |
| ENSG00000136149                                               | ENSG00000136149 PPI subnetwork                                | 0.1             |
| GO:0043410                                                    | positive regulation of MAPK cascade                           | 0.1             |
| MP:0000642                                                    | enlarged adrenal glands                                       | 0.1             |
| MP:0003795                                                    | abnormal bone structure                                       | 0.1             |
| MP:0003648                                                    | abnormal radial glial cell morphology                         | 0.1             |
| MP:0004151                                                    | decreased circulating iron level                              | 0.1             |
| REACTOME_TRANSPORT_OF_INORGANIC_CATIONSANIONS_AND_AMINO_ACIDS | REACTOME_TRANSPORT_OF_INORGANIC_CATIONSANIONS_AND_AMINO_ACIDS | 0.1             |
| ENSG00000154727                                               | GABPA PPI subnetwork                                          | 0.1             |
| MP:0003427                                                    | parakeratosis                                                 | 0.1             |
| GO:0031300                                                    | intrinsic to organelle membrane                               | 0.1             |
| MP:0002098                                                    | abnormal vibrissa morphology                                  | 0.1             |



| Original gene set ID                                        | Original gene set description                                  | Nominal P value |
|-------------------------------------------------------------|----------------------------------------------------------------|-----------------|
| GO:0032607                                                  | interferon-alpha production                                    | 0.1             |
| GO:0032647                                                  | regulation of interferon-alpha production                      | 0.1             |
| MP:0004358                                                  | bowed tibia                                                    | 0.1             |
| GO:0008544                                                  | epidermis development                                          | 0.1             |
| ENSG00000101224                                             | CDC25B PPI subnetwork                                          | 0.1             |
| ENSG00000106144                                             | CASP2 PPI subnetwork                                           | 0.1             |
| MP:0001208                                                  | blistering                                                     | 0.1             |
| REACTOME_INTERLEUKIN:7_SIGNALING                            | REACTOME_INTERLEUKIN:7_SIGNALING                               | 0.1             |
| REACTOME_GAMMA:CARBOXYLATION_TRANSPORT_AND_AMINO:TERMINAL_C | REACTOME_GAMMA:CARBOXYLATION_TRANSPORT_AND_AMINO:TERMINAL_CLEA | 0.1             |
| ENSG00000107562                                             | CXCL12 PPI subnetwork                                          | 0.1             |
| GO:0005342                                                  | organic acid transmembrane transporter activity                | 0.1             |
| GO:0005385                                                  | zinc ion transmembrane transporter activity                    | 0.1             |
| MP:0008883                                                  | abnormal enterocyte proliferation                              | 0.1             |
| GO:0048020                                                  | CCR chemokine receptor binding                                 | 0.1             |
| ENSG00000172936                                             | MYD88 PPI subnetwork                                           | 0.1             |
| MP:0002375                                                  | abnormal thymus medulla morphology                             | 0.1             |
| GO:0003774                                                  | motor activity                                                 | 0.1             |
| GO:0071356                                                  | cellular response to tumor necrosis factor                     | 0.11            |
| MP:0003954                                                  | abnormal Reichert's membrane morphology                        | 0.11            |
| MP:0004592                                                  | small mandible                                                 | 0.11            |
| MP:0008111                                                  | abnormal granulocyte differentiation                           | 0.11            |
| GO:0030055                                                  | cell-substrate junction                                        | 0.11            |
| MP:0000628                                                  | abnormal mammary gland development                             | 0.11            |
| ENSG00000158560                                             | DYNC111 PPI subnetwork                                         | 0.11            |
| GO:0019955                                                  | cytokine binding                                               | 0.11            |
| GO:0034385                                                  | triglyceride-rich lipoprotein particle                         | 0.11            |
| GO:0034361                                                  | very-low-density lipoprotein particle                          | 0.11            |
| MP:0002759                                                  | abnormal caudal vertebrae morphology                           | 0.11            |
| GO:0055038                                                  | recycling endosome membrane                                    | 0.11            |
| ENSG00000119139                                             | TJP2 PPI subnetwork                                            | 0.11            |
| REACTOME_PLATELET_DEGRANULATION                             | REACTOME_PLATELET_DEGRANULATION                                | 0.11            |
| GO:0007159                                                  | leukocyte cell-cell adhesion                                   | 0.11            |
| ENSG00000096968                                             | JAK2 PPI subnetwork                                            | 0.11            |
| MP:0008050                                                  | decreased memory T cell number                                 | 0.11            |
| GO:0006413                                                  | translational initiation                                       | 0.11            |
| MP:0001393                                                  | ataxia                                                         | 0.11            |
| ENSG00000089009                                             | RPL6 PPI subnetwork                                            | 0.11            |
| REACTOME_NF:KB_IS_ACTIVATED_AND_SIGNALS_SURVIVAL            | REACTOME_NF:KB_IS_ACTIVATED_AND_SIGNALS_SURVIVAL               | 0.11            |
| ENSG00000089737                                             | DDX24 PPI subnetwork                                           | 0.11            |
| ENSG00000091831                                             | ESR1 PPI subnetwork                                            | 0.11            |
| GO:0034340                                                  | response to type I interferon                                  | 0.11            |
| ENSG00000147507                                             | ENSG00000147507 PPI subnetwork                                 | 0.11            |
| MP:0004521                                                  | abnormal cochlear hair cell stereociliary bundle morphology    | 0.11            |
| GO:0032354                                                  | response to follicle-stimulating hormone stimulus              | 0.11            |
| ENSG00000108953                                             | YWHAE PPI subnetwork                                           | 0.11            |
| ENSG00000213923                                             | CSNK1E PPI subnetwork                                          | 0.11            |
| ENSG00000170017                                             | ALCAM PPI subnetwork                                           | 0.11            |
| GO:0016863                                                  | intramolecular oxidoreductase activity, transposing C=C bonds  | 0.11            |
| ENSG00000146729                                             | GBAS PPI subnetwork                                            | 0.11            |



| Original gene set ID                                          | Original gene set description                                                                               | Nominal P value |
|---------------------------------------------------------------|-------------------------------------------------------------------------------------------------------------|-----------------|
| ENSG00000181827                                               | RFX7 PPI subnetwork                                                                                         | 0.11            |
| ENSG00000116285                                               | ERRF1 PPI subnetwork                                                                                        | 0.11            |
| ENSG00000105193                                               | RPS16 PPI subnetwork                                                                                        | 0.11            |
| ENSG00000093167                                               | LRRFIP2 PPI subnetwork                                                                                      | 0.11            |
| KEGG_N_GLYCAN_BIOSYNTHESIS                                    | KEGG_N_GLYCAN_BIOSYNTHESIS                                                                                  | 0.11            |
| ENSG00000113580                                               | NR3C1 PPI subnetwork                                                                                        | 0.11            |
| ENSG00000058335                                               | RASGRF1 PPI subnetwork                                                                                      | 0.11            |
| ENSG00000100815                                               | TRIP11 PPI subnetwork                                                                                       | 0.11            |
| ENSG00000001630                                               | CYP51A1 PPI subnetwork                                                                                      | 0.11            |
| ENSG00000166986                                               | MARS PPI subnetwork                                                                                         | 0.11            |
| GO:0044403                                                    | symbiosis, encompassing mutualism through parasitism                                                        | 0.11            |
| MP:0008246                                                    | abnormal leukocyte morphology                                                                               | 0.12            |
| MP:0003884                                                    | decreased macrophage cell number                                                                            | 0.12            |
| REACTOME_DSCAM_INTERACTIONS                                   | REACTOME_DSCAM_INTERACTIONS                                                                                 | 0.12            |
| ENSG00000126749                                               | ENSG00000126749 PPI subnetwork                                                                              | 0.12            |
| ENSG00000106665                                               | CLIP2 PPI subnetwork                                                                                        | 0.12            |
| ENSG00000179776                                               | CDH5 PPI subnetwork                                                                                         | 0.12            |
| ENSG00000142534                                               | RPS11 PPI subnetwork                                                                                        | 0.12            |
| ENSG00000170677                                               | SOCS6 PPI subnetwork                                                                                        | 0.12            |
| GO:0005272                                                    | sodium channel activity                                                                                     | 0.12            |
| MP:0008074                                                    | increased CD4-positive T cell number                                                                        | 0.12            |
| ENSG00000077943                                               | ITGA8 PPI subnetwork                                                                                        | 0.12            |
| GO:0016125                                                    | sterol metabolic process                                                                                    | 0.12            |
| GO:0071345                                                    | cellular response to cytokine stimulus                                                                      | 0.12            |
| GO:0004004                                                    | ATP-dependent RNA helicase activity                                                                         | 0.12            |
| MP:0005179                                                    | decreased circulating cholesterol level                                                                     | 0.12            |
| GO:0031301                                                    | integral to organelle membrane                                                                              | 0.12            |
| ENSG00000010610                                               | CD4 PPI subnetwork                                                                                          | 0.12            |
| ENSG00000056345                                               | ENSG00000056345 PPI subnetwork                                                                              | 0.12            |
| ENSG00000100181                                               | ENSG00000100181 PPI subnetwork                                                                              | 0.12            |
| GO:0001078                                                    | RNA polymerase II core promoter proximal region sequence-specific DNA binding transcription factor activity | 0.12            |
| ENSG00000130402                                               | ACTN4 PPI subnetwork                                                                                        | 0.12            |
| ENSG00000084207                                               | GSTP1 PPI subnetwork                                                                                        | 0.12            |
| ENSG00000183305                                               | MAGEA2B PPI subnetwork                                                                                      | 0.12            |
| ENSG00000034971                                               | MYOC PPI subnetwork                                                                                         | 0.12            |
| MP:0004471                                                    | short nasal bone                                                                                            | 0.12            |
| MP:0003304                                                    | large intestinal inflammation                                                                               | 0.12            |
| ENSG00000112078                                               | KCTD20 PPI subnetwork                                                                                       | 0.12            |
| MP:0000565                                                    | oligodactyly                                                                                                | 0.12            |
| GO:0044419                                                    | interspecies interaction between organisms                                                                  | 0.12            |
| MP:0001177                                                    | atelectasis                                                                                                 | 0.12            |
| GO:0017136                                                    | NAD-dependent histone deacetylase activity                                                                  | 0.12            |
| GO:0034979                                                    | NAD-dependent protein deacetylase activity                                                                  | 0.12            |
| GO:0008585                                                    | female gonad development                                                                                    | 0.12            |
| ENSG00000105173                                               | CCNE1 PPI subnetwork                                                                                        | 0.12            |
| ENSG00000105974                                               | CAV1 PPI subnetwork                                                                                         | 0.12            |
| MP:0005296                                                    | abnormal humerus morphology                                                                                 | 0.12            |
| REACTOME_CHOLESTEROL_BIOSYNTHESIS                             | REACTOME_CHOLESTEROL_BIOSYNTHESIS                                                                           | 0.12            |
| KEGG_GLYCOSPHINGOLIPID_BIOSYNTHESIS_LACTO_AND_NEOLACTO_SERIES | KEGG_GLYCOSPHINGOLIPID_BIOSYNTHESIS_LACTO_AND_NEOLACTO_SERIES                                               | 0.12            |



| Original gene set ID                                | Original gene set description                       | Nominal P value |
|-----------------------------------------------------|-----------------------------------------------------|-----------------|
| ENSG00000197535                                     | MYO5A PPI subnetwork                                | 0.12            |
| KEGG_PROGESTERONE_MEDIATED_OOCYTE_MATURATION        | KEGG_PROGESTERONE_MEDIATED_OOCYTE_MATURATION        | 0.12            |
| GO:0005924                                          | cell-substrate adherens junction                    | 0.12            |
| MP:0002187                                          | abnormal fibula morphology                          | 0.12            |
| GO:0030301                                          | cholesterol transport                               | 0.12            |
| REACTOME_PEPTIDE_CHAIN_ELONGATION                   | REACTOME_PEPTIDE_CHAIN_ELONGATION                   | 0.12            |
| ENSG00000182326                                     | C1S PPI subnetwork                                  | 0.12            |
| ENSG00000136997                                     | MYC PPI subnetwork                                  | 0.12            |
| ENSG00000162302                                     | RPS6KA4 PPI subnetwork                              | 0.12            |
| ENSG00000179262                                     | RAD23A PPI subnetwork                               | 0.12            |
| GO:0009303                                          | rRNA transcription                                  | 0.12            |
| ENSG00000185507                                     | IRF7 PPI subnetwork                                 | 0.13            |
| GO:0008134                                          | transcription factor binding                        | 0.13            |
| REACTOME_LIPID_DIGESTION_MOBILIZATION_AND_TRANSPORT | REACTOME_LIPID_DIGESTION_MOBILIZATION_AND_TRANSPORT | 0.13            |
| ENSG00000111859                                     | NEDD9 PPI subnetwork                                | 0.13            |
| ENSG00000144895                                     | EIF2A PPI subnetwork                                | 0.13            |
| MP:0008565                                          | decreased interferon-beta secretion                 | 0.13            |
| GO:0005160                                          | transforming growth factor beta receptor binding    | 0.13            |
| ENSG00000107807                                     | TLX1 PPI subnetwork                                 | 0.13            |
| ENSG00000114423                                     | CBLB PPI subnetwork                                 | 0.13            |
| ENSG00000076641                                     | PAG1 PPI subnetwork                                 | 0.13            |
| ENSG00000178184                                     | PARD6G PPI subnetwork                               | 0.13            |
| GO:0001944                                          | vasculature development                             | 0.13            |
| ENSG00000140650                                     | PMM2 PPI subnetwork                                 | 0.13            |
| GO:0016202                                          | regulation of striated muscle tissue development    | 0.13            |
| MP:0002781                                          | increased circulating testosterone leve             | 0.13            |
| ENSG00000007312                                     | CD79B PPI subnetwork                                | 0.13            |
| MP:0003058                                          | increased insulin secretion                         | 0.13            |
| MP:0000691                                          | enlarged spleen                                     | 0.13            |
| GO:0005547                                          | phosphatidylinositol-3,4,5-trisphosphate binding    | 0.13            |
| ENSG00000109814                                     | UGDH PPI subnetwork                                 | 0.13            |
| ENSG00000155329                                     | ZCCHC10 PPI subnetwork                              | 0.13            |
| GO:0008360                                          | regulation of cell shape                            | 0.13            |
| ENSG00000162298                                     | SYVN1 PPI subnetwork                                | 0.13            |
| ENSG00000138798                                     | EGF PPI subnetwork                                  | 0.13            |
| GO:0006968                                          | cellular defense response                           | 0.13            |
| ENSG00000008838                                     | MED24 PPI subnetwork                                | 0.13            |
| MP:0002818                                          | abnormal dentin morphology                          | 0.13            |
| MP:0003091                                          | abnormal cell migration                             | 0.13            |
| MP:0004921                                          | decreased placenta weight                           | 0.13            |
| GO:0006695                                          | cholesterol biosynthetic process                    | 0.13            |
| MP:0005621                                          | abnormal cell physiology                            | 0.13            |
| KEGG_COMPLEMENT_AND_COAGULATION_CASCADES            | KEGG_COMPLEMENT_AND_COAGULATION_CASCADES            | 0.13            |
| GO:0022602                                          | ovulation cycle process                             | 0.13            |
| MP:0008088                                          | abnormal T-helper 1 cell differentiation            | 0.13            |
| ENSG00000072135                                     | PTPN18 PPI subnetwork                               | 0.13            |
| ENSG00000109475                                     | RPL34 PPI subnetwork                                | 0.13            |
| GO:0010906                                          | regulation of glucose metabolic process             | 0.13            |
| ENSG00000012124                                     | CD22 PPI subnetwork                                 | 0.13            |



| Original gene set ID                       | Original gene set description                                                 | Nominal P value |
|--------------------------------------------|-------------------------------------------------------------------------------|-----------------|
| MP:0003850                                 | abnormal thymocyte activation                                                 | 0.13            |
| ENSG00000213741                            | RPS29 PPI subnetwork                                                          | 0.13            |
| ENSG00000198000                            | NOL8 PPI subnetwork                                                           | 0.13            |
| ENSG00000160087                            | UBE2J2 PPI subnetwork                                                         | 0.13            |
| ENSG00000125695                            | STRADA PPI subnetwork                                                         | 0.13            |
| ENSG00000186895                            | FGF3 PPI subnetwork                                                           | 0.13            |
| REACTOME_G_ALPHA_1213_SIGNALLING_EVENTS    | REACTOME_G_ALPHA_1213_SIGNALLING_EVENTS                                       | 0.13            |
| GO:0000981                                 | sequence-specific DNA binding RNA polymerase II transcription factor activity | 0.13            |
| KEGG_ADIPOCYTOKINE_SIGNALING_PATHWAY       | KEGG_ADIPOCYTOKINE_SIGNALING_PATHWAY                                          | 0.13            |
| GO:0061039                                 | ovum-producing ovary development                                              | 0.13            |
| ENSG00000165733                            | BMS1 PPI subnetwork                                                           | 0.13            |
| MP:0005201                                 | abnormal retinal pigment epithelium morphology                                | 0.13            |
| GO:0016126                                 | sterol biosynthetic process                                                   | 0.13            |
| ENSG00000101331                            | C20orf160 PPI subnetwork                                                      | 0.13            |
| KEGG_INSULIN_SIGNALING_PATHWAY             | KEGG_INSULIN_SIGNALING_PATHWAY                                                | 0.13            |
| MP:0001860                                 | liver inflammation                                                            | 0.13            |
| GO:0015291                                 | secondary active transmembrane transporter activity                           | 0.13            |
| ENSG00000140464                            | PML PPI subnetwork                                                            | 0.13            |
| ENSG00000089157                            | RPLPO PPI subnetwork                                                          | 0.13            |
| REACTOME_EUKARYOTIC_TRANSLATION_ELONGATION | REACTOME_EUKARYOTIC_TRANSLATION_ELONGATION                                    | 0.13            |
| GO:0031091                                 | platelet alpha granule                                                        | 0.13            |
| ENSG00000197386                            | HTT PPI subnetwork                                                            | 0.13            |
| ENSG00000174485                            | DENND4A PPI subnetwork                                                        | 0.13            |
| GO:0032330                                 | regulation of chondrocyte differentiator                                      | 0.13            |
| GO:0005912                                 | adherens junction                                                             | 0.13            |
| ENSG00000168399                            | ENSG00000168399 PPI subnetwork                                                | 0.13            |
| ENSG00000204273                            | ENSG00000204273 PPI subnetwork                                                | 0.13            |
| ENSG00000206284                            | WDR46 PPI subnetwork                                                          | 0.13            |
| ENSG00000204221                            | WDR46 PPI subnetwork                                                          | 0.13            |
| GO:0048634                                 | regulation of muscle organ development                                        | 0.13            |
| ENSG00000144744                            | UBA3 PPI subnetwork                                                           | 0.13            |
| ENSG00000136634                            | IL10 PPI subnetwork                                                           | 0.13            |
| ENSG00000165702                            | GFI1B PPI subnetwork                                                          | 0.13            |
| MP:0008190                                 | decreased transitional stage B cell number                                    | 0.13            |
| ENSG00000126768                            | TIMM17B PPI subnetwork                                                        | 0.13            |
| ENSG00000168610                            | STAT3 PPI subnetwork                                                          | 0.13            |
| MP:0001805                                 | decreased IgG level                                                           | 0.13            |
| ENSG00000133794                            | ARNTL PPI subnetwork                                                          | 0.13            |
| ENSG00000136021                            | SCYL2 PPI subnetwork                                                          | 0.13            |
| MP:0000379                                 | decreased hair follicle number                                                | 0.13            |
| MP:0001575                                 | cyanosis                                                                      | 0.13            |
| GO:0031984                                 | organelle subcompartment                                                      | 0.13            |
| ENSG00000106028                            | SSBP1 PPI subnetwork                                                          | 0.13            |
| GO:0051119                                 | sugar transmembrane transporter activity                                      | 0.13            |
| GO:0016323                                 | basolateral plasma membrane                                                   | 0.13            |
| MP:0009356                                 | decreased liver triglyceride level                                            | 0.13            |
| GO:0016486                                 | peptide hormone processing                                                    | 0.13            |
| ENSG00000159216                            | RUNX1 PPI subnetwork                                                          | 0.13            |
| ENSG00000114686                            | MRPL3 PPI subnetwork                                                          | 0.13            |



| Original gene set ID                                                | Original gene set description                                       | Nominal P value |
|---------------------------------------------------------------------|---------------------------------------------------------------------|-----------------|
| GO:0007276                                                          | gamete generation                                                   | 0.14            |
| ENSG00000163519                                                     | TRAT1 PPI subnetwork                                                | 0.14            |
| ENSG00000174748                                                     | RPL15 PPI subnetwork                                                | 0.14            |
| MP:0006317                                                          | decreased urine sodium level                                        | 0.14            |
| GO:0045104                                                          | intermediate filament cytoskeleton organizati                       | 0.14            |
| MP:0001284                                                          | absent vibrissae                                                    | 0.14            |
| ENSG00000185499                                                     | MUC1 PPI subnetwork                                                 | 0.14            |
| MP:0008127                                                          | decreased dendritic cell number                                     | 0.14            |
| ENSG00000134242                                                     | PTPN22 PPI subnetwork                                               | 0.14            |
| GO:0005044                                                          | scavenger receptor activity                                         | 0.14            |
| ENSG00000087245                                                     | MMP2 PPI subnetwork                                                 | 0.14            |
| MP:0002727                                                          | decreased circulating insulin level                                 | 0.14            |
| GO:0015012                                                          | heparan sulfate proteoglycan biosynthetic process                   | 0.14            |
| GO:0031965                                                          | nuclear membrane                                                    | 0.14            |
| GO:0005792                                                          | microsome                                                           | 0.14            |
| ENSG00000161835                                                     | GRASP PPI subnetwork                                                | 0.14            |
| MP:0005089                                                          | decreased double-negative T cell number                             | 0.14            |
| REACTOME_CD28_DEPENDENT_PI3KAKT_SIGNALING                           | REACTOME_CD28_DEPENDENT_PI3KAKT_SIGNALING                           | 0.14            |
| GO:0051604                                                          | protein maturation                                                  | 0.14            |
| GO:0050691                                                          | regulation of defense response to virus by host                     | 0.14            |
| MP:0010465                                                          | aberrant origin of the right subclavian artery                      | 0.14            |
| REACTOME_REGULATION_OF_LIPID_METABOLISM_BY_PEROXISOME_PROLIFERATION | REACTOME_REGULATION_OF_LIPID_METABOLISM_BY_PEROXISOME_PROLIFERATION | 0.14            |
| REACTOME_P75NTR_RECRUITS_SIGNALLING_COMPLEXES                       | REACTOME_P75NTR_RECRUITS_SIGNALLING_COMPLEXES                       | 0.14            |
| REACTOME_NUCLEAR_RECEPTOR_TRANSCRIPTION_PATHWAY                     | REACTOME_NUCLEAR_RECEPTOR_TRANSCRIPTION_PATHWAY                     | 0.14            |
| ENSG00000139318                                                     | DUSP6 PPI subnetwork                                                | 0.14            |
| MP:0003396                                                          | abnormal embryonic hematopoiesis                                    | 0.14            |
| GO:0007346                                                          | regulation of mitotic cell cycle                                    | 0.14            |
| GO:0045596                                                          | negative regulation of cell differentiation                         | 0.14            |
| GO:0007584                                                          | response to nutrient                                                | 0.14            |
| GO:0048194                                                          | Golgi vesicle budding                                               | 0.14            |
| REACTOME_METABOLISM_OF_PROTEINS                                     | REACTOME_METABOLISM_OF_PROTEINS                                     | 0.14            |
| MP:0003156                                                          | abnormal leukocyte migration                                        | 0.14            |
| GO:0050654                                                          | chondroitin sulfate proteoglycan metabolic process                  | 0.14            |
| ENSG00000177731                                                     | FLII PPI subnetwork                                                 | 0.14            |
| GO:0071339                                                          | MLL1 complex                                                        | 0.14            |
| MP:0000598                                                          | abnormal liver morphology                                           | 0.14            |
| GO:0002673                                                          | regulation of acute inflammatory response                           | 0.14            |
| ENSG00000130956                                                     | HABP4 PPI subnetwork                                                | 0.14            |
| ENSG00000171490                                                     | RSL1D1 PPI subnetwork                                               | 0.14            |
| ENSG00000169896                                                     | ITGAM PPI subnetwork                                                | 0.14            |
| REACTOME_RESPONSE_TO_ELEVATED_PLATELET_CYTOSOLIC_CA2                | REACTOME_RESPONSE_TO_ELEVATED_PLATELET_CYTOSOLIC_CA2                | 0.14            |
| GO:0014911                                                          | positive regulation of smooth muscle cell migration                 | 0.14            |
| MP:0001953                                                          | respiratory failure                                                 | 0.14            |
| ENSG00000169398                                                     | PTK2 PPI subnetwork                                                 | 0.14            |
| ENSG00000182636                                                     | NDN PPI subnetwork                                                  | 0.14            |
| MP:0008209                                                          | decreased pre-B cell number                                         | 0.14            |
| REACTOME_POST:TRANSLATIONAL_PROTEIN_MODIFICATION                    | REACTOME_POST:TRANSLATIONAL_PROTEIN_MODIFICATION                    | 0.14            |
| MP:0002113                                                          | abnormal skeleton development                                       | 0.14            |
| ENSG00000171862                                                     | PTEN PPI subnetwork                                                 | 0.14            |





| Original gene set ID                                             | Original gene set description                                                        | Nominal P value |
|------------------------------------------------------------------|--------------------------------------------------------------------------------------|-----------------|
| GO:0003705                                                       | RNA polymerase II distal enhancer sequence-specific DNA binding transcription factor | 0.15            |
| GO:0001570                                                       | vasculogenesis                                                                       | 0.15            |
| MP:0002731                                                       | megacolon                                                                            | 0.15            |
| ENSG00000147403                                                  | RPL10 PPI subnetwork                                                                 | 0.15            |
| ENSG00000175592                                                  | FOSL1 PPI subnetwork                                                                 | 0.15            |
| ENSG00000174697                                                  | LEP PPI subnetwork                                                                   | 0.15            |
| MP:0001919                                                       | abnormal reproductive system physiology                                              | 0.15            |
| ENSG00000136574                                                  | GATA4 PPI subnetwork                                                                 | 0.15            |
| ENSG00000162891                                                  | IL20 PPI subnetwork                                                                  | 0.15            |
| MP:0000321                                                       | increased bone marrow cell number                                                    | 0.15            |
| GO:0046966                                                       | thyroid hormone receptor binding                                                     | 0.15            |
| GO:0019319                                                       | hexose biosynthetic process                                                          | 0.15            |
| GO:0032580                                                       | Golgi cisterna membrane                                                              | 0.15            |
| MP:0003638                                                       | abnormal response/metabolism to endogenous compounds                                 | 0.15            |
| GO:0030947                                                       | regulation of vascular endothelial growth factor receptor signaling pathway          | 0.15            |
| ENSG00000120948                                                  | TARDBP PPI subnetwork                                                                | 0.15            |
| ENSG00000166285                                                  | ENSG00000166285 PPI subnetwork                                                       | 0.15            |
| ENSG00000204359                                                  | CFB PPI subnetwork                                                                   | 0.15            |
| GO:0008653                                                       | lipopolysaccharide metabolic process                                                 | 0.15            |
| GO:0042803                                                       | protein homodimerization activity                                                    | 0.15            |
| ENSG00000037241                                                  | RPL26L1 PPI subnetwork                                                               | 0.15            |
| GO:0048514                                                       | blood vessel morphogenesis                                                           | 0.15            |
| MP:0000416                                                       | sparse hair                                                                          | 0.15            |
| ENSG00000128487                                                  | SPECC1 PPI subnetwork                                                                | 0.15            |
| REACTOME_GTP_HYDROLYSIS_AND_JOINING_OF_THE_60S_RIBOSOMAL_SUBUNIT | REACTOME_GTP_HYDROLYSIS_AND_JOINING_OF_THE_60S_RIBOSOMAL_SUBUNIT                     | 0.15            |
| ENSG00000189403                                                  | HMGB1 PPI subnetwork                                                                 | 0.15            |
| ENSG00000148297                                                  | MED22 PPI subnetwork                                                                 | 0.15            |
| GO:0006916                                                       | anti-apoptosis                                                                       | 0.15            |
| ENSG00000117408                                                  | IPO13 PPI subnetwork                                                                 | 0.15            |
| ENSG00000156273                                                  | BACH1 PPI subnetwork                                                                 | 0.16            |
| MP:0000454                                                       | abnormal jaw morphology                                                              | 0.16            |
| ENSG00000213625                                                  | LEPROT PPI subnetwork                                                                | 0.16            |
| GO:0005313                                                       | L-glutamate transmembrane transporter activity                                       | 0.16            |
| GO:0050650                                                       | chondroitin sulfate proteoglycan biosynthetic process                                | 0.16            |
| GO:0005179                                                       | hormone activity                                                                     | 0.16            |
| MP:0002493                                                       | increased IgG level                                                                  | 0.16            |
| GO:0004806                                                       | triglyceride lipase activity                                                         | 0.16            |
| GO:0015103                                                       | inorganic anion transmembrane transporter activity                                   | 0.16            |
| GO:0070482                                                       | response to oxygen levels                                                            | 0.16            |
| ENSG00000196700                                                  | ZNF512B PPI subnetwork                                                               | 0.16            |
| ENSG00000134588                                                  | USP26 PPI subnetwork                                                                 | 0.16            |
| GO:0001568                                                       | blood vessel development                                                             | 0.16            |
| GO:0016585                                                       | chromatin remodeling complex                                                         | 0.16            |
| REACTOME_RHO_GTPASE_CYCLE                                        | REACTOME_RHO_GTPASE_CYCLE                                                            | 0.16            |
| REACTOME_SIGNALING_BY_RHO_GTPASES                                | REACTOME_SIGNALING_BY_RHO_GTPASES                                                    | 0.16            |
| GO:0043449                                                       | cellular alkene metabolic process                                                    | 0.16            |
| GO:0006691                                                       | leukotriene metabolic process                                                        | 0.16            |
| GO:0030098                                                       | lymphocyte differentiation                                                           | 0.16            |
| ENSG00000072195                                                  | SPEG PPI subnetwork                                                                  | 0.16            |

| Original gene set ID                  | Original gene set description                     | Nominal P value |
|---------------------------------------|---------------------------------------------------|-----------------|
| ENSG00000160791                       | CCR5 PPI subnetwork                               | 0.16            |
| ENSG00000215778                       | ENSG00000215778 PPI subnetwork                    | 0.16            |
| MP:0008719                            | impaired neutrophil recruitment                   | 0.16            |
| MP:0004016                            | decreased bone mass                               | 0.16            |
| MP:0002192                            | hydrops fetalis                                   | 0.16            |
| MP:0002356                            | abnormal spleen red pulp morphology               | 0.16            |
| GO:0031060                            | regulation of histone methylation                 | 0.16            |
| ENSG00000149084                       | HSD17B12 PPI subnetwork                           | 0.16            |
| ENSG00000086061                       | DNAJA1 PPI subnetwork                             | 0.16            |
| GO:0008202                            | steroid metabolic process                         | 0.16            |
| ENSG00000144867                       | SRPRB PPI subnetwork                              | 0.16            |
| ENSG00000198780                       | FAM169A PPI subnetwork                            | 0.16            |
| MP:0009858                            | abnormal cellular extravasation                   | 0.16            |
| GO:0000323                            | lytic vacuole                                     | 0.16            |
| GO:0005764                            | lysosome                                          | 0.16            |
| ENSG00000140481                       | CCDC33 PPI subnetwork                             | 0.16            |
| ENSG00000129048                       | CCRL1 PPI subnetwork                              | 0.16            |
| ENSG00000212695                       | ENSG00000212695 PPI subnetwork                    | 0.16            |
| GO:0032924                            | activin receptor signaling pathway                | 0.16            |
| REACTOME_N:GLYCAN_ANTENNAE_ELONGATION | REACTOME_N:GLYCAN_ANTENNAE_ELONGATION             | 0.16            |
| MP:0005006                            | abnormal osteoblast physiology                    | 0.16            |
| ENSG00000105397                       | TYK2 PPI subnetwork                               | 0.16            |
| ENSG00000077942                       | FBLN1 PPI subnetwork                              | 0.16            |
| GO:0015923                            | mannosidase activity                              | 0.16            |
| MP:0008254                            | increased megakaryocyte cell number               | 0.16            |
| GO:0032006                            | regulation of TOR signaling cascade               | 0.16            |
| ENSG00000144648                       | CCBP2 PPI subnetwork                              | 0.16            |
| GO:0003729                            | mRNA binding                                      | 0.16            |
| MP:0002754                            | dilated heart right ventricle                     | 0.16            |
| MP:0002833                            | increased heart weight                            | 0.16            |
| GO:0042383                            | sarcolemma                                        | 0.16            |
| ENSG00000138376                       | BARD1 PPI subnetwork                              | 0.16            |
| MP:0008553                            | increased circulating tumor necrosis factor leve  | 0.16            |
| ENSG00000188687                       | SLC4A5 PPI subnetwork                             | 0.16            |
| KEGG_PRIMARY_IMMUNODEFICIENCY         | KEGG_PRIMARY_IMMUNODEFICIENCY                     | 0.16            |
| ENSG00000138107                       | ACTR1A PPI subnetwork                             | 0.16            |
| MP:0010027                            | increased liver cholesterol level                 | 0.16            |
| GO:0048487                            | beta-tubulin binding                              | 0.16            |
| ENSG00000134419                       | RPS15A PPI subnetwork                             | 0.16            |
| GO:0043450                            | alkene biosynthetic process                       | 0.16            |
| GO:0019370                            | leukotriene biosynthetic process                  | 0.16            |
| GO:0033619                            | membrane protein proteolysis                      | 0.16            |
| GO:0043241                            | protein complex disassembly                       | 0.16            |
| GO:0032728                            | positive regulation of interferon-beta production | 0.16            |
| ENSG00000111679                       | PTPN6 PPI subnetwork                              | 0.16            |
| MP:0000600                            | liver hypoplasia                                  | 0.16            |
| ENSG00000171791                       | BCL2 PPI subnetwork                               | 0.16            |
| ENSG00000146677                       | ENSG00000146677 PPI subnetwork                    | 0.16            |
| GO:0050863                            | regulation of T cell activation                   | 0.16            |

| Original gene set ID                     | Original gene set description                                                         | Nominal P value |
|------------------------------------------|---------------------------------------------------------------------------------------|-----------------|
| GO:0016814                               | hydrolase activity, acting on carbon-nitrogen (but not peptide) bonds, in cyclic amid | 0.16            |
| ENSG00000104365                          | IKKBK PPI subnetwork                                                                  | 0.16            |
| MP:0004905                               | decreased uterus weight                                                               | 0.16            |
| GO:0005790                               | smooth endoplasmic reticulum                                                          | 0.16            |
| GO:0008028                               | monocarboxylic acid transmembrane transporter activity                                | 0.16            |
| ENSG00000170871                          | KIAA0232 PPI subnetwork                                                               | 0.16            |
| ENSG00000206340                          | C4A PPI subnetwork                                                                    | 0.16            |
| ENSG00000172172                          | MRPL13 PPI subnetwork                                                                 | 0.16            |
| MP:0002932                               | abnormal joint morphology                                                             | 0.16            |
| GO:0015909                               | long-chain fatty acid transport                                                       | 0.16            |
| GO:0060537                               | muscle tissue development                                                             | 0.16            |
| MP:0008075                               | decreased CD4-positive T cell number                                                  | 0.16            |
| ENSG00000147955                          | SIGMAR1 PPI subnetwork                                                                | 0.16            |
| GO:0006023                               | aminoglycan biosynthetic process                                                      | 0.16            |
| GO:0034405                               | response to fluid shear stress                                                        | 0.16            |
| MP:0001874                               | acanthosis                                                                            | 0.16            |
| ENSG00000206413                          | ENSG00000206413 PPI subnetwork                                                        | 0.16            |
| ENSG00000206493                          | HLA-E PPI subnetwork                                                                  | 0.16            |
| MP:0011320                               | abnormal glomerular capillary morphology                                              | 0.16            |
| MP:0001156                               | abnormal spermatogenesis                                                              | 0.16            |
| GO:0019198                               | transmembrane receptor protein phosphatase activity                                   | 0.16            |
| GO:0005001                               | transmembrane receptor protein tyrosine phosphatase activity                          | 0.16            |
| GO:0001726                               | ruffle                                                                                | 0.16            |
| GO:0031047                               | gene silencing by RNA                                                                 | 0.16            |
| MP:0005232                               | abnormal mesenteric lymph node morphology                                             | 0.16            |
| ENSG00000071537                          | SEL1L PPI subnetwork                                                                  | 0.16            |
| ENSG00000189037                          | DUSP21 PPI subnetwork                                                                 | 0.16            |
| GO:0033209                               | tumor necrosis factor-mediated signaling pathway                                      | 0.16            |
| GO:0030658                               | transport vesicle membrane                                                            | 0.16            |
| ENSG00000065989                          | PDE4A PPI subnetwork                                                                  | 0.16            |
| ENSG00000175333                          | ENSG00000175333 PPI subnetwork                                                        | 0.16            |
| ENSG00000177283                          | FZD8 PPI subnetwork                                                                   | 0.16            |
| GO:0035725                               | sodium ion transmembrane transport                                                    | 0.16            |
| MP:0001732                               | postnatal growth retardation                                                          | 0.16            |
| GO:0018195                               | peptidyl-arginine modification                                                        | 0.16            |
| GO:0001893                               | maternal placenta development                                                         | 0.16            |
| REACTOME_PPARG_ACTIVATES_GENE_EXPRESSION | REACTOME_PPARG_ACTIVATES_GENE_EXPRESSION                                              | 0.16            |
| ENSG00000127329                          | PTPRB PPI subnetwork                                                                  | 0.16            |
| MP:0011143                               | thick lung-associated mesenchyme                                                      | 0.16            |
| ENSG00000121989                          | ACVR2A PPI subnetwork                                                                 | 0.16            |
| MP:0005015                               | increased T cell number                                                               | 0.16            |
| GO:0001501                               | skeletal system development                                                           | 0.16            |
| ENSG00000111241                          | FGF6 PPI subnetwork                                                                   | 0.16            |
| ENSG00000107831                          | FGF8 PPI subnetwork                                                                   | 0.16            |
| ENSG00000158815                          | FGF17 PPI subnetwork                                                                  | 0.16            |
| ENSG00000162344                          | FGF19 PPI subnetwork                                                                  | 0.16            |
| ENSG00000156427                          | FGF18 PPI subnetwork                                                                  | 0.16            |
| ENSG00000070388                          | FGF22 PPI subnetwork                                                                  | 0.16            |
| ENSG00000183337                          | BCOR PPI subnetwork                                                                   | 0.17            |



| Original gene set ID                              | Original gene set description                                                         | Nominal P value |
|---------------------------------------------------|---------------------------------------------------------------------------------------|-----------------|
| GO:0008654                                        | phospholipid biosynthetic process                                                     | 0.17            |
| ENSG00000115268                                   | RPS15 PPI subnetwork                                                                  | 0.17            |
| GO:0010469                                        | regulation of receptor activity                                                       | 0.17            |
| GO:0042632                                        | cholesterol homeostasis                                                               | 0.17            |
| GO:0055092                                        | sterol homeostasis                                                                    | 0.17            |
| ENSG00000163714                                   | U2SURP PPI subnetwork                                                                 | 0.17            |
| ENSG00000132664                                   | POLR3F PPI subnetwork                                                                 | 0.17            |
| ENSG00000186660                                   | ZFP91 PPI subnetwork                                                                  | 0.17            |
| GO:0035313                                        | wound healing, spreading of epidermal cells                                           | 0.17            |
| GO:0034706                                        | sodium channel complex                                                                | 0.17            |
| MP:0000377                                        | abnormal hair follicle morphology                                                     | 0.17            |
| GO:0005874                                        | microtubule                                                                           | 0.17            |
| GO:0031345                                        | negative regulation of cell projection organization                                   | 0.17            |
| REACTOME_LIPOPROTEIN_METABOLISM                   | REACTOME_LIPOPROTEIN_METABOLISM                                                       | 0.17            |
| ENSG00000052749                                   | RRP12 PPI subnetwork                                                                  | 0.17            |
| MP:0000121                                        | failure of tooth eruption                                                             | 0.17            |
| GO:0001829                                        | trophoblast cell differentiation                                                      | 0.17            |
| ENSG00000145777                                   | TSLP PPI subnetwork                                                                   | 0.17            |
| GO:0016765                                        | transferase activity, transferring alkyl or aryl (other than methyl) group:           | 0.17            |
| MP:0000947                                        | convulsive seizures                                                                   | 0.17            |
| GO:0006656                                        | phosphatidylcholine biosynthetic process                                              | 0.17            |
| ENSG00000164754                                   | RAD21 PPI subnetwork                                                                  | 0.17            |
| REACTOME_NRF1_SIGNALS_CELL_DEATH_FROM_THE_NUCLEUS | REACTOME_NRF1_SIGNALS_CELL_DEATH_FROM_THE_NUCLEUS                                     | 0.17            |
| ENSG00000122861                                   | PLAU PPI subnetwork                                                                   | 0.17            |
| MP:0002177                                        | abnormal outer ear morphology                                                         | 0.17            |
| KEGG_GLYCOSAMINOGLYCAN_DEGRADATION                | KEGG_GLYCOSAMINOGLYCAN_DEGRADATION                                                    | 0.17            |
| GO:0005913                                        | cell-cell adherens junction                                                           | 0.17            |
| ENSG00000160801                                   | PTH1R PPI subnetwork                                                                  | 0.17            |
| GO:0015918                                        | sterol transport                                                                      | 0.17            |
| ENSG00000095752                                   | IL11 PPI subnetwork                                                                   | 0.17            |
| REACTOME_Glutamate neurotransmitter release cycle | REACTOME_Glutamate neurotransmitter release cycle                                     | 0.17            |
| ENSG00000171401                                   | KRT13 PPI subnetwork                                                                  | 0.17            |
| ENSG00000102882                                   | MAPK3 PPI subnetwork                                                                  | 0.17            |
| GO:0007160                                        | cell-matrix adhesion                                                                  | 0.17            |
| GO:0016798                                        | hydrolase activity, acting on glycosyl bonds                                          | 0.17            |
| GO:0043299                                        | leukocyte degranulation                                                               | 0.17            |
| MP:0000130                                        | abnormal trabecular bone morphology                                                   | 0.17            |
| GO:0004879                                        | ligand-activated sequence-specific DNA binding RNA polymerase II transcription factor | 0.17            |
| ENSG00000100823                                   | APEX1 PPI subnetwork                                                                  | 0.17            |
| MP:0003409                                        | decreased width of hypertrophic chondrocyte zone                                      | 0.17            |
| ENSG00000162244                                   | RPL29 PPI subnetwork                                                                  | 0.17            |
| MP:0001200                                        | thick skin                                                                            | 0.17            |
| ENSG00000065361                                   | ERBB3 PPI subnetwork                                                                  | 0.17            |
| GO:0035195                                        | gene silencing by miRNA                                                               | 0.17            |
| ENSG00000211896                                   | ENSG00000211896 PPI subnetwork                                                        | 0.17            |
| ENSG00000148843                                   | PDCD11 PPI subnetwork                                                                 | 0.17            |
| MP:0001750                                        | increased circulating follicle stimulating hormone level                              | 0.17            |
| MP:0008097                                        | increased plasma cell number                                                          | 0.17            |
| ENSG00000136715                                   | SAP130 PPI subnetwork                                                                 | 0.17            |



| Original gene set ID                                      | Original gene set description                                         | Nominal P value |
|-----------------------------------------------------------|-----------------------------------------------------------------------|-----------------|
| REACTOME_REGULATION_OF_PYRUVATE_DEHYDROGENASE_PDH_COMPLEX | REACTOME_REGULATION_OF_PYRUVATE_DEHYDROGENASE_PDH_COMPLEX             | 0.17            |
| ENSG00000169136                                           | ATF5 PPI subnetwork                                                   | 0.17            |
| MP:0006397                                                | disorganized long bone epiphyseal plate                               | 0.17            |
| GO:0046546                                                | development of primary male sexual characteristics                    | 0.17            |
| ENSG00000127318                                           | IL22 PPI subnetwork                                                   | 0.17            |
| MP:0003998                                                | decreased thermal nociceptive threshold                               | 0.17            |
| MP:0008782                                                | increased B cell apoptosis                                            | 0.17            |
| ENSG00000033327                                           | GAB2 PPI subnetwork                                                   | 0.17            |
| GO:0015172                                                | acidic amino acid transmembrane transporter activity                  | 0.17            |
| ENSG00000110492                                           | MDK PPI subnetwork                                                    | 0.17            |
| GO:0010741                                                | negative regulation of intracellular protein kinase cascade           | 0.17            |
| GO:0005251                                                | delayed rectifier potassium channel activity                          | 0.17            |
| GO:0042158                                                | lipoprotein biosynthetic process                                      | 0.17            |
| MP:0003140                                                | dilated heart atrium                                                  | 0.17            |
| ENSG00000012660                                           | ELOVL5 PPI subnetwork                                                 | 0.17            |
| REACTOME_HEMOSTASIS                                       | REACTOME_HEMOSTASIS                                                   | 0.17            |
| ENSG00000127511                                           | SIN3B PPI subnetwork                                                  | 0.17            |
| ENSG00000150281                                           | CTF1 PPI subnetwork                                                   | 0.17            |
| ENSG00000125998                                           | FAM83C PPI subnetwork                                                 | 0.17            |
| MP:0001190                                                | reddish skin                                                          | 0.17            |
| GO:0043687                                                | post-translational protein modification                               | 0.17            |
| GO:0006415                                                | translational termination                                             | 0.18            |
| GO:0032312                                                | regulation of ARF GTPase activity                                     | 0.18            |
| GO:0030198                                                | extracellular matrix organization                                     | 0.18            |
| GO:0043062                                                | extracellular structure organization                                  | 0.18            |
| GO:0046777                                                | protein autophosphorylation                                           | 0.18            |
| ENSG00000175221                                           | MED16 PPI subnetwork                                                  | 0.18            |
| ENSG00000167721                                           | TSR1 PPI subnetwork                                                   | 0.18            |
| GO:0019210                                                | kinase inhibitor activity                                             | 0.18            |
| GO:0022625                                                | cytosolic large ribosomal subunit                                     | 0.18            |
| MP:0001925                                                | male infertility                                                      | 0.18            |
| ENSG00000129219                                           | PLD2 PPI subnetwork                                                   | 0.18            |
| ENSG00000058729                                           | RIOK2 PPI subnetwork                                                  | 0.18            |
| GO:0015450                                                | P-P-bond-hydrolysis-driven protein transmembrane transporter activity | 0.18            |
| ENSG00000103742                                           | IGDCC4 PPI subnetwork                                                 | 0.18            |
| MP:0002447                                                | abnormal erythrocyte morphology                                       | 0.18            |
| REACTOME_CELL_JUNCTION_ORGANIZATION                       | REACTOME_CELL_JUNCTION_ORGANIZATION                                   | 0.18            |
| ENSG00000161970                                           | RPL26 PPI subnetwork                                                  | 0.18            |
| ENSG00000147873                                           | IFNA5 PPI subnetwork                                                  | 0.18            |
| ENSG00000186803                                           | IFNA10 PPI subnetwork                                                 | 0.18            |
| ENSG00000120247                                           | ENSG00000120247 PPI subnetwork                                        | 0.18            |
| ENSG00000147877                                           | ENSG00000147877 PPI subnetwork                                        | 0.18            |
| ENSG00000188379                                           | IFNA2 PPI subnetwork                                                  | 0.18            |
| ENSG00000186809                                           | ENSG00000186809 PPI subnetwork                                        | 0.18            |
| ENSG00000147885                                           | IFNA16 PPI subnetwork                                                 | 0.18            |
| ENSG00000137080                                           | IFNA21 PPI subnetwork                                                 | 0.18            |
| ENSG00000120242                                           | IFNA8 PPI subnetwork                                                  | 0.18            |
| GO:0043967                                                | histone H4 acetylation                                                | 0.18            |
| MP:0002904                                                | increased circulating parathyroid hormone leve                        | 0.18            |

| Original gene set ID                      | Original gene set description                                   | Nominal P value |
|-------------------------------------------|-----------------------------------------------------------------|-----------------|
| GO:0046697                                | decidualization                                                 | 0.18            |
| MP:0008115                                | abnormal dendritic cell differentiation                         | 0.18            |
| ENSG00000086189                           | DIMT1 PPI subnetwork                                            | 0.18            |
| ENSG00000113889                           | KNG1 PPI subnetwork                                             | 0.18            |
| MP:0005146                                | decreased circulating VLDL cholesterol leve                     | 0.18            |
| MP:0005136                                | decreased growth hormone level                                  | 0.18            |
| ENSG00000188130                           | MAPK12 PPI subnetwork                                           | 0.18            |
| GO:0016779                                | nucleotidyltransferase activity                                 | 0.18            |
| GO:0010907                                | positive regulation of glucose metabolic process                | 0.18            |
| ENSG00000100842                           | EFS PPI subnetwork                                              | 0.18            |
| REACTOME_METAL_ION_SLC_TRANSPORTERS       | REACTOME_METAL_ION_SLC_TRANSPORTERS                             | 0.18            |
| GO:0006829                                | zinc ion transport                                              | 0.18            |
| GO:0090263                                | positive regulation of canonical Wnt receptor signaling pathway | 0.18            |
| KEGG_TERPENOID_BACKBONE_BIOSYNTHESIS      | KEGG_TERPENOID_BACKBONE_BIOSYNTHESIS                            | 0.18            |
| MP:0000187                                | abnormal triglyceride level                                     | 0.18            |
| GO:0030246                                | carbohydrate binding                                            | 0.18            |
| GO:0017048                                | Rho GTPase binding                                              | 0.18            |
| MP:0000259                                | abnormal vascular development                                   | 0.18            |
| MP:0008844                                | decreased subcutaneous adipose tissue amount                    | 0.18            |
| KEGG_BASAL_CELL_CARCINOMA                 | KEGG_BASAL_CELL_CARCINOMA                                       | 0.18            |
| GO:0050839                                | cell adhesion molecule binding                                  | 0.18            |
| GO:0015145                                | monosaccharide transmembrane transporter activity               | 0.18            |
| GO:0004181                                | metallocarboxypeptidase activity                                | 0.18            |
| ENSG00000155957                           | TMBIM4 PPI subnetwork                                           | 0.18            |
| GO:0006412                                | translation                                                     | 0.18            |
| REACTOME_GPVI:MEDIATED_ACTIVATION_CASCADE | REACTOME_GPVI:MEDIATED_ACTIVATION_CASCADE                       | 0.18            |
| MP:0008658                                | decreased interleukin-1 beta secretion                          | 0.18            |
| ENSG00000163956                           | LRPAP1 PPI subnetwork                                           | 0.18            |
| GO:0016528                                | sarcoplasm                                                      | 0.18            |
| ENSG00000082781                           | ITGB5 PPI subnetwork                                            | 0.18            |
| GO:0045069                                | regulation of viral genome replication                          | 0.18            |
| MP:0005048                                | thrombosis                                                      | 0.18            |
| ENSG00000206308                           | HLA-DRA PPI subnetwork                                          | 0.18            |
| GO:0005635                                | nuclear envelope                                                | 0.18            |
| GO:0044420                                | extracellular matrix part                                       | 0.18            |
| REACTOME_INTERFERON_SIGNALING             | REACTOME_INTERFERON_SIGNALING                                   | 0.18            |
| MP:0000706                                | small thymus                                                    | 0.18            |
| GO:0051569                                | regulation of histone H3-K4 methylation                         | 0.18            |
| ENSG00000204983                           | PRSS1 PPI subnetwork                                            | 0.18            |
| MP:0004841                                | abnormal small intestine crypts of Lieberkuhn morphology        | 0.18            |
| ENSG00000115866                           | DARS PPI subnetwork                                             | 0.18            |
| GO:0001825                                | blastocyst formation                                            | 0.18            |
| MP:0009414                                | skeletal muscle fiber necrosis                                  | 0.18            |
| ENSG00000173039                           | RELA PPI subnetwork                                             | 0.18            |
| KEGG_ENDOCYTOSIS                          | KEGG_ENDOCYTOSIS                                                | 0.18            |
| ENSG00000171223                           | JUNB PPI subnetwork                                             | 0.18            |
| ENSG00000136110                           | LECT1 PPI subnetwork                                            | 0.18            |
| GO:0005537                                | mannose binding                                                 | 0.18            |
| ENSG00000138326                           | RPS24 PPI subnetwork                                            | 0.18            |

| Original gene set ID                                            | Original gene set description                                   | Nominal P value |
|-----------------------------------------------------------------|-----------------------------------------------------------------|-----------------|
| ENSG00000183311                                                 | TUBB PPI subnetwork                                             | 0.18            |
| ENSG00000196230                                                 | TUBB PPI subnetwork                                             | 0.18            |
| ENSG00000137379                                                 | ENSG00000137379 PPI subnetwork                                  | 0.18            |
| GO:0004659                                                      | prenyltransferase activity                                      | 0.18            |
| MP:0004229                                                      | abnormal embryonic erythropoiesis                               | 0.18            |
| MP:0000554                                                      | abnormal carpal bone morphology                                 | 0.18            |
| ENSG00000133511                                                 | ENSG00000133511 PPI subnetwork                                  | 0.18            |
| REACTOME_PLATELET_ACTIVATION_SIGNALING_AND_AGGREGATION          | REACTOME_PLATELET_ACTIVATION_SIGNALING_AND_AGGREGATION          | 0.18            |
| GO:0070085                                                      | glycosylation                                                   | 0.18            |
| ENSG00000133935                                                 | C14orf1 PPI subnetwork                                          | 0.18            |
| REACTOME_NF:KB_ACTIVATION_THROUGH_FADDRIP:1_PATHWAY_MEDIATED_BY | REACTOME_NF:KB_ACTIVATION_THROUGH_FADDRIP:1_PATHWAY_MEDIATED_BY | 0.18            |
| MP:0002724                                                      | enhanced wound healing                                          | 0.18            |
| ENSG00000110169                                                 | HPX PPI subnetwork                                              | 0.18            |
| REACTOME_PLATELET_AGGREGATION_PLUG_FORMATION                    | REACTOME_PLATELET_AGGREGATION_PLUG_FORMATION                    | 0.18            |
| MP:0009743                                                      | preaxial polydactyly                                            | 0.18            |
| ENSG00000188223                                                 | LIN37 PPI subnetwork                                            | 0.18            |
| ENSG00000182774                                                 | RPS17L PPI subnetwork                                           | 0.18            |
| ENSG00000184779                                                 | RPS17 PPI subnetwork                                            | 0.18            |
| GO:0004675                                                      | transmembrane receptor protein serine/threonine kinase activity | 0.18            |
| MP:0009940                                                      | abnormal hippocampus pyramidal cell morphology                  | 0.18            |
| MP:0000928                                                      | incomplete cephalic closure                                     | 0.18            |
| MP:0002666                                                      | increased circulating aldosterone level                         | 0.18            |
| REACTOME_TERMINATION_OF_O:GLYCAN_BIOSYNTHESIS                   | REACTOME_TERMINATION_OF_O:GLYCAN_BIOSYNTHESIS                   | 0.18            |
| GO:0015924                                                      | mannosyl-oligosaccharide mannosidase activity                   | 0.18            |
| ENSG00000133805                                                 | AMPD3 PPI subnetwork                                            | 0.18            |
| ENSG00000106125                                                 | FAM188B PPI subnetwork                                          | 0.18            |
| ENSG00000157168                                                 | NRG1 PPI subnetwork                                             | 0.18            |
| MP:0005025                                                      | abnormal response to infection                                  | 0.18            |
| ENSG00000183405                                                 | ENSG00000183405 PPI subnetwork                                  | 0.18            |
| ENSG00000182446                                                 | NPLOC4 PPI subnetwork                                           | 0.18            |
| MP:0001819                                                      | abnormal immune cell physiology                                 | 0.18            |
| MP:0003408                                                      | increased width of hypertrophic chondrocyte zone                | 0.18            |
| MP:0009142                                                      | decreased prepulse inhibition                                   | 0.18            |
| REACTOME_CYTOKINE_SIGNALING_IN_IMMUNE_SYSTEM                    | REACTOME_CYTOKINE_SIGNALING_IN_IMMUNE_SYSTEM                    | 0.18            |
| GO:0032680                                                      | regulation of tumor necrosis factor production                  | 0.18            |
| GO:0032640                                                      | tumor necrosis factor production                                | 0.18            |
| MP:0004808                                                      | abnormal hematopoietic stem cell morphology                     | 0.18            |
| GO:0043330                                                      | response to exogenous dsRNA                                     | 0.18            |
| GO:0002922                                                      | positive regulation of humoral immune response                  | 0.18            |
| MP:0002432                                                      | abnormal CD4-positive T cell morphology                         | 0.18            |
| ENSG00000188529                                                 | SRSF10 PPI subnetwork                                           | 0.18            |
| ENSG00000160213                                                 | CSTB PPI subnetwork                                             | 0.18            |
| MP:0010067                                                      | increased red blood cell distribution width                     | 0.18            |
| ENSG00000111845                                                 | PAK1IP1 PPI subnetwork                                          | 0.18            |
| ENSG00000198467                                                 | TPM2 PPI subnetwork                                             | 0.18            |
| ENSG00000163513                                                 | TGFBR2 PPI subnetwork                                           | 0.18            |
| ENSG00000075539                                                 | FRYL PPI subnetwork                                             | 0.18            |
| MP:0006059                                                      | decreased susceptibility to ischemic brain injury               | 0.18            |
| ENSG00000186468                                                 | RPS23 PPI subnetwork                                            | 0.18            |



| Original gene set ID                                           | Original gene set description                                                  | Nominal P value |
|----------------------------------------------------------------|--------------------------------------------------------------------------------|-----------------|
| GO:0031985                                                     | Golgi cisterna                                                                 | 0.19            |
| ENSG00000118402                                                | ELOVL4 PPI subnetwork                                                          | 0.19            |
| ENSG00000104969                                                | SGTA PPI subnetwork                                                            | 0.19            |
| MP:0003984                                                     | embryonic growth retardation                                                   | 0.19            |
| KEGG_CELL_CYCLE                                                | KEGG_CELL_CYCLE                                                                | 0.19            |
| ENSG00000145781                                                | COMMD10 PPI subnetwork                                                         | 0.19            |
| GO:0043492                                                     | ATPase activity, coupled to movement of substances                             | 0.19            |
| ENSG00000169083                                                | AR PPI subnetwork                                                              | 0.19            |
| ENSG00000115718                                                | PROC PPI subnetwork                                                            | 0.19            |
| ENSG00000083845                                                | RPS5 PPI subnetwork                                                            | 0.19            |
| ENSG00000197959                                                | DNM3 PPI subnetwork                                                            | 0.19            |
| GO:0043401                                                     | steroid hormone mediated signaling pathway                                     | 0.19            |
| MP:0003216                                                     | absence seizures                                                               | 0.19            |
| MP:0001289                                                     | persistence of hyaloid vascular system                                         | 0.19            |
| ENSG00000064012                                                | CASP8 PPI subnetwork                                                           | 0.19            |
| ENSG00000119408                                                | NEK6 PPI subnetwork                                                            | 0.19            |
| MP:0001622                                                     | abnormal vasculogenesis                                                        | 0.19            |
| ENSG00000113520                                                | IL4 PPI subnetwork                                                             | 0.19            |
| ENSG00000196656                                                | ENSG00000196656 PPI subnetwork                                                 | 0.19            |
| ENSG00000197728                                                | RPS26 PPI subnetwork                                                           | 0.19            |
| ENSG00000117410                                                | ATP6V0B PPI subnetwork                                                         | 0.19            |
| REACTOME_METABOLISM_OF_STEROID_HORMONES_AND_VITAMINS_A_AND_D   | REACTOME_METABOLISM_OF_STEROID_HORMONES_AND_VITAMINS_A_AND_D                   | 0.19            |
| ENSG00000164022                                                | AIMP1 PPI subnetwork                                                           | 0.19            |
| MP:0001127                                                     | small ovary                                                                    | 0.19            |
| MP:0000291                                                     | enlarged pericardium                                                           | 0.19            |
| ENSG00000163347                                                | CLDN1 PPI subnetwork                                                           | 0.19            |
| ENSG00000112118                                                | MCM3 PPI subnetwork                                                            | 0.19            |
| ENSG00000163050                                                | ADCK3 PPI subnetwork                                                           | 0.19            |
| GO:0032480                                                     | negative regulation of type I interferon productior                            | 0.19            |
| GO:0090179                                                     | planar cell polarity pathway involved in neural tube closure                   | 0.19            |
| GO:0090178                                                     | regulation of establishment of planar polarity involved in neural tube closure | 0.19            |
| MP:0001601                                                     | abnormal myelopoiesis                                                          | 0.19            |
| ENSG00000106462                                                | EZH2 PPI subnetwork                                                            | 0.19            |
| REACTOME_RNA_POLYMERASE_III_ABORTIVE_AND_RETRACTIVE_INITIATION | REACTOME_RNA_POLYMERASE_III_ABORTIVE_AND_RETRACTIVE_INITIATION                 | 0.19            |
| REACTOME_RNA_POLYMERASE_III_TRANSCRIPTION                      | REACTOME_RNA_POLYMERASE_III_TRANSCRIPTION                                      | 0.19            |
| ENSG00000196365                                                | LONP1 PPI subnetwork                                                           | 0.19            |
| MP:0002078                                                     | abnormal glucose homeostasis                                                   | 0.19            |
| ENSG00000006062                                                | MAP3K14 PPI subnetwork                                                         | 0.19            |
| ENSG00000077150                                                | NFKB2 PPI subnetwork                                                           | 0.19            |
| ENSG00000166197                                                | NOLC1 PPI subnetwork                                                           | 0.19            |
| ENSG00000133101                                                | CCNA1 PPI subnetwork                                                           | 0.19            |
| GO:0014706                                                     | striated muscle tissue development                                             | 0.19            |
| MP:0010300                                                     | increased skin tumor incidence                                                 | 0.19            |
| GO:0009749                                                     | response to glucose stimulus                                                   | 0.19            |
| ENSG00000013441                                                | CLK1 PPI subnetwork                                                            | 0.19            |
| ENSG00000120800                                                | UTP20 PPI subnetwork                                                           | 0.19            |
| ENSG00000175387                                                | SMAD2 PPI subnetwork                                                           | 0.19            |
| ENSG00000124006                                                | OBSL1 PPI subnetwork                                                           | 0.19            |
| GO:0032494                                                     | response to peptidoglycan                                                      | 0.19            |

| <b>Original gene set ID</b>  | <b>Original gene set description</b>         | <b>Nominal P value</b> |
|------------------------------|----------------------------------------------|------------------------|
| REACTOME_GLUCOSE_METABOLISM  | REACTOME_GLUCOSE_METABOLISM                  | 0.19                   |
| ENSG00000198517              | MAFK PPI subnetwork                          | 0.19                   |
| MP:0005185                   | decreased circulating progesterone level     | 0.19                   |
| GO:0055017                   | cardiac muscle tissue growth                 | 0.19                   |
| MP:0002543                   | brachyphalangia                              | 0.19                   |
| GO:0007266                   | Rho protein signal transduction              | 0.19                   |
| MP:0001802                   | arrested B cell differentiation              | 0.19                   |
| ENSG00000182393              | IL29 PPI subnetwork                          | 0.19                   |
| ENSG00000111536              | IL26 PPI subnetwork                          | 0.19                   |
| ENSG00000142224              | IL19 PPI subnetwork                          | 0.19                   |
| ENSG00000145839              | IL9 PPI subnetwork                           | 0.19                   |
| ENSG00000183709              | IL28A PPI subnetwork                         | 0.19                   |
| ENSG00000162892              | IL24 PPI subnetwork                          | 0.19                   |
| ENSG00000104432              | IL7 PPI subnetwork                           | 0.19                   |
| ENSG00000177047              | IFNW1 PPI subnetwork                         | 0.19                   |
| ENSG00000164136              | IL15 PPI subnetwork                          | 0.19                   |
| ENSG00000147896              | IFNK PPI subnetwork                          | 0.19                   |
| ENSG00000138684              | IL21 PPI subnetwork                          | 0.19                   |
| ENSG00000128342              | LIF PPI subnetwork                           | 0.19                   |
| ENSG00000184995              | IFNE PPI subnetwork                          | 0.19                   |
| ENSG00000197110              | IL28B PPI subnetwork                         | 0.19                   |
| GO:0003779                   | actin binding                                | 0.19                   |
| ENSG00000104938              | CLEC4M PPI subnetwork                        | 0.19                   |
| GO:0000803                   | sex chromosome                               | 0.19                   |
| GO:0017153                   | sodium:dicarboxylate symporter activity      | 0.19                   |
| ENSG00000110944              | IL23A PPI subnetwork                         | 0.19                   |
| GO:0007530                   | sex determination                            | 0.19                   |
| ENSG00000188994              | ZNF292 PPI subnetwork                        | 0.19                   |
| MP:0011506                   | glomerular crescent                          | 0.19                   |
| MP:0000572                   | abnormal autopod morphology                  | 0.19                   |
| KEGG_COLORECTAL_CANCER       | KEGG_COLORECTAL_CANCER                       | 0.19                   |
| MP:0008102                   | lymph node hyperplasia                       | 0.19                   |
| GO:0007548                   | sex differentiation                          | 0.19                   |
| ENSG00000213764              | ENSG00000213764 PPI subnetwork               | 0.2                    |
| ENSG00000196459              | TRAPPC2 PPI subnetwork                       | 0.2                    |
| ENSG00000105202              | FBL PPI subnetwork                           | 0.2                    |
| GO:0030159                   | receptor signaling complex scaffold activity | 0.2                    |
| ENSG00000010278              | CD9 PPI subnetwork                           | 0.2                    |
| GO:0002690                   | positive regulation of leukocyte chemotaxis  | 0.2                    |
| ENSG00000107282              | APBA1 PPI subnetwork                         | 0.2                    |
| KEGG_NOTCH_SIGNALING_PATHWAY | KEGG_NOTCH_SIGNALING_PATHWAY                 | 0.2                    |
| ENSG00000198646              | NCOA6 PPI subnetwork                         | 0.2                    |
| ENSG00000131051              | RBM39 PPI subnetwork                         | 0.2                    |
| ENSG00000154134              | ROBO3 PPI subnetwork                         | 0.2                    |
| MP:0008347                   | decreased gamma-delta T cell number          | 0.2                    |
| ENSG00000130396              | MLLT4 PPI subnetwork                         | 0.2                    |
| ENSG00000145192              | AHSG PPI subnetwork                          | 0.2                    |
| ENSG00000170027              | YWHAG PPI subnetwork                         | 0.2                    |
| ENSG00000132603              | NIP7 PPI subnetwork                          | 0.2                    |



| Original gene set ID                                  | Original gene set description                         | Nominal P value |
|-------------------------------------------------------|-------------------------------------------------------|-----------------|
| ENSG00000156482                                       | RPL30 PPI subnetwork                                  | 0.2             |
| ENSG00000103266                                       | STUB1 PPI subnetwork                                  | 0.2             |
| GO:0050776                                            | regulation of immune response                         | 0.2             |
| ENSG00000116962                                       | NID1 PPI subnetwork                                   | 0.2             |
| ENSG00000143520                                       | FLG2 PPI subnetwork                                   | 0.2             |
| ENSG00000138722                                       | MMRN1 PPI subnetwork                                  | 0.2             |
| ENSG00000090861                                       | AARS PPI subnetwork                                   | 0.2             |
| GO:0015908                                            | fatty acid transport                                  | 0.2             |
| GO:0008017                                            | microtubule binding                                   | 0.2             |
| ENSG00000082641                                       | NFE2L1 PPI subnetwork                                 | 0.2             |
| REACTOME_EUKARYOTIC_TRANSLATION_INITIATION            | REACTOME_EUKARYOTIC_TRANSLATION_INITIATION            | 0.2             |
| REACTOME_CAP:DEPENDENT_TRANSLATION_INITIATION         | REACTOME_CAP:DEPENDENT_TRANSLATION_INITIATION         | 0.2             |
| ENSG00000163162                                       | RNF149 PPI subnetwork                                 | 0.2             |
| GO:0001817                                            | regulation of cytokine production                     | 0.2             |
| REACTOME_HORMONE_LIGAND:BINDING_RECEPTORS             | REACTOME_HORMONE_LIGAND:BINDING_RECEPTORS             | 0.2             |
| GO:0015813                                            | L-glutamate transport                                 | 0.2             |
| GO:0006869                                            | lipid transport                                       | 0.2             |
| REACTOME_GROWTH_HORMONE_RECEPTOR_SIGNALING            | REACTOME_GROWTH_HORMONE_RECEPTOR_SIGNALING            | 0.2             |
| GO:0008088                                            | axon cargo transport                                  | 0.2             |
| GO:0002444                                            | myeloid leukocyte mediated immunity                   | 0.2             |
| ENSG00000166167                                       | BTRC PPI subnetwork                                   | 0.2             |
| ENSG00000074071                                       | MRPS34 PPI subnetwork                                 | 0.2             |
| MP:0001195                                            | flaky skin                                            | 0.2             |
| GO:0010717                                            | regulation of epithelial to mesenchymal transition    | 0.2             |
| ENSG00000161203                                       | AP2M1 PPI subnetwork                                  | 0.2             |
| ENSG00000105127                                       | AKAP8 PPI subnetwork                                  | 0.2             |
| ENSG00000213044                                       | ENSG00000213044 PPI subnetwork                        | 0.2             |
| GO:0001913                                            | T cell mediated cytotoxicity                          | 0.2             |
| ENSG00000030110                                       | BAK1 PPI subnetwork                                   | 0.2             |
| MP:0001194                                            | dermatitis                                            | 0.2             |
| ENSG00000172179                                       | PRL PPI subnetwork                                    | 0.2             |
| ENSG00000122026                                       | RPL21 PPI subnetwork                                  | 0.2             |
| ENSG00000164924                                       | YWHAZ PPI subnetwork                                  | 0.2             |
| GO:0016500                                            | protein-hormone receptor activity                     | 0.2             |
| ENSG00000156976                                       | EIF4A2 PPI subnetwork                                 | 0.2             |
| MP:0000652                                            | enlarged sebaceous gland                              | 0.2             |
| GO:0002253                                            | activation of immune response                         | 0.2             |
| ENSG00000100603                                       | SNW1 PPI subnetwork                                   | 0.2             |
| GO:0043434                                            | response to peptide hormone stimulus                  | 0.2             |
| MP:0001258                                            | decreased body length                                 | 0.2             |
| MP:0004607                                            | abnormal cervical atlas morphology                    | 0.2             |
| ENSG00000179409                                       | GEMIN4 PPI subnetwork                                 | 0.2             |
| MP:0000167                                            | decreased chondrocyte cell number                     | 0.2             |
| ENSG00000033011                                       | ALG1 PPI subnetwork                                   | 0.2             |
| ENSG00000169992                                       | NLGN2 PPI subnetwork                                  | 0.2             |
| GO:0012507                                            | ER to Golgi transport vesicle membrane                | 0.2             |
| MP:0001154                                            | seminiferous tubule degeneration                      | 0.2             |
| GO:0051184                                            | cofactor transporter activity                         | 0.2             |
| REACTOME_RNA_POLYMERASE_III_TRANSCRIPTION_TERMINATION | REACTOME_RNA_POLYMERASE_III_TRANSCRIPTION_TERMINATION | 0.2             |

**Original gene set ID****Original gene set description****Nominal P value**

|                                                                |                                                                   |     |
|----------------------------------------------------------------|-------------------------------------------------------------------|-----|
| GO:0071383                                                     | cellular response to steroid hormone stimulus                     | 0.2 |
| ENSG00000113407                                                | TARS PPI subnetwork                                               | 0.2 |
| ENSG00000124228                                                | DDX27 PPI subnetwork                                              | 0.2 |
| MP:0003227                                                     | abnormal vascular branching morphogenesis                         | 0.2 |
| GO:0045351                                                     | type I interferon biosynthetic process                            | 0.2 |
| GO:2000106                                                     | regulation of leukocyte apoptotic process                         | 0.2 |
| REACTOME_GLYCOLYSIS                                            | REACTOME_GLYCOLYSIS                                               | 0.2 |
| ENSG00000102391                                                | ENSG00000102391 PPI subnetwork                                    | 0.2 |
| ENSG00000035403                                                | VCL PPI subnetwork                                                | 0.2 |
| ENSG00000164134                                                | NAA15 PPI subnetwork                                              | 0.2 |
| ENSG00000164399                                                | IL3 PPI subnetwork                                                | 0.2 |
| GO:0043901                                                     | negative regulation of multi-organism process                     | 0.2 |
| MP:0000825                                                     | dilated lateral ventricles                                        | 0.2 |
| ENSG00000119285                                                | HEATR1 PPI subnetwork                                             | 0.2 |
| ENSG0000011243                                                 | AKAP8L PPI subnetwork                                             | 0.2 |
| GO:0016485                                                     | protein processing                                                | 0.2 |
| ENSG00000160285                                                | LSS PPI subnetwork                                                | 0.2 |
| ENSG00000127022                                                | CANX PPI subnetwork                                               | 0.2 |
| MP:0000462                                                     | abnormal digestive system morphology                              | 0.2 |
| ENSG00000005961                                                | ITGA2B PPI subnetwork                                             | 0.2 |
| GO:0061097                                                     | regulation of protein tyrosine kinase activity                    | 0.2 |
| GO:0048770                                                     | pigment granule                                                   | 0.2 |
| GO:0042470                                                     | melanosome                                                        | 0.2 |
| ENSG00000144713                                                | RPL32 PPI subnetwork                                              | 0.2 |
| REACTOME_3_UTR:MEDIATED_TRANSLATIONAL_REGULATION               | REACTOME_3_UTR:MEDIATED_TRANSLATIONAL_REGULATION                  | 0.2 |
| REACTOME_L13A:MEDIATED_TRANSLATIONAL_SILENCING_OF_CERULOPLASMI | REACTOME_L13A:MEDIATED_TRANSLATIONAL_SILENCING_OF_CERULOPLASMIN_E | 0.2 |
| ENSG00000114391                                                | RPL24 PPI subnetwork                                              | 0.2 |
| GO:0042278                                                     | purine nucleoside metabolic process                               | 0.2 |
| KEGG_MTOR_SIGNALING_PATHWAY                                    | KEGG_MTOR_SIGNALING_PATHWAY                                       | 0.2 |
| ENSG00000215412                                                | ENSG00000215412 PPI subnetwork                                    | 0.2 |
| ENSG00000198563                                                | DDX39B PPI subnetwork                                             | 0.2 |
| ENSG00000215425                                                | DDX39B PPI subnetwork                                             | 0.2 |
| GO:0050921                                                     | positive regulation of chemotaxis                                 | 0.2 |
| ENSG00000123159                                                | GIPC1 PPI subnetwork                                              | 0.2 |
| ENSG00000169194                                                | IL13 PPI subnetwork                                               | 0.2 |
| ENSG00000038002                                                | AGA PPI subnetwork                                                | 0.2 |
| MP:0005091                                                     | increased double-positive T cell number                           | 0.2 |
| MP:0003720                                                     | abnormal neural tube closure                                      | 0.2 |
| MP:0001260                                                     | increased body weight                                             | 0.2 |
| GO:0006342                                                     | chromatin silencing                                               | 0.2 |
| GO:0006006                                                     | glucose metabolic process                                         | 0.2 |
| GO:0055102                                                     | lipase inhibitor activity                                         | 0.2 |
| REACTOME_TRAF3:DEPENDENT_IRF_ACTIVATION_PATHWAY                | REACTOME_TRAF3:DEPENDENT_IRF_ACTIVATION_PATHWAY                   | 0.2 |
| MP:0008511                                                     | thin retinal inner nuclear layer                                  | 0.2 |
| MP:0000715                                                     | decreased thymocyte number                                        | 0.2 |
| GO:0008289                                                     | lipid binding                                                     | 0.2 |
| ENSG00000131069                                                | ACSS2 PPI subnetwork                                              | 0.2 |
| ENSG00000205246                                                | RPSAP58 PPI subnetwork                                            | 0.2 |
| GO:0008593                                                     | regulation of Notch signaling pathway                             | 0.2 |







| Original gene set ID                            | Original gene set description                                     | Nominal P value |
|-------------------------------------------------|-------------------------------------------------------------------|-----------------|
| GO:0015721                                      | bile acid and bile salt transport                                 | 0.22            |
| ENSG000000082512                                | TRAF5 PPI subnetwork                                              | 0.22            |
| KEGG_NEUROTROPHIN_SIGNALING_PATHWAY             | KEGG_NEUROTROPHIN_SIGNALING_PATHWAY                               | 0.22            |
| MP:0008892                                      | abnormal sperm flagellum morphology                               | 0.22            |
| ENSG00000134882                                 | UBAC2 PPI subnetwork                                              | 0.22            |
| ENSG00000140992                                 | PDPK1 PPI subnetwork                                              | 0.22            |
| GO:0071359                                      | cellular response to dsRNA                                        | 0.22            |
| ENSG00000103275                                 | UBE2I PPI subnetwork                                              | 0.22            |
| ENSG00000187899                                 | ENSG00000187899 PPI subnetwork                                    | 0.22            |
| MP:0008026                                      | abnormal brain white matter morphology                            | 0.22            |
| MP:0008495                                      | decreased IgG1 level                                              | 0.22            |
| MP:0003044                                      | impaired basement membrane formation                              | 0.22            |
| GO:0015935                                      | small ribosomal subunit                                           | 0.22            |
| GO:0006661                                      | phosphatidylinositol biosynthetic process                         | 0.22            |
| ENSG00000113302                                 | IL12B PPI subnetwork                                              | 0.22            |
| GO:0015800                                      | acidic amino acid transport                                       | 0.22            |
| ENSG00000135845                                 | PIGC PPI subnetwork                                               | 0.22            |
| ENSG00000170727                                 | BOP1 PPI subnetwork                                               | 0.22            |
| ENSG00000114739                                 | ACVR2B PPI subnetwork                                             | 0.22            |
| GO:0034762                                      | regulation of transmembrane transport                             | 0.22            |
| ENSG00000115816                                 | CEBPZ PPI subnetwork                                              | 0.22            |
| ENSG00000123064                                 | DDX54 PPI subnetwork                                              | 0.22            |
| MP:0000443                                      | abnormal snout morphology                                         | 0.22            |
| MP:0009763                                      | increased sensitivity to induced morbidity/mortality              | 0.22            |
| GO:0021700                                      | developmental maturation                                          | 0.22            |
| MP:0002217                                      | small lymph nodes                                                 | 0.22            |
| GO:0001945                                      | lymph vessel development                                          | 0.22            |
| MP:0000250                                      | abnormal vasoconstriction                                         | 0.22            |
| GO:0007176                                      | regulation of epidermal growth factor-activated receptor activity | 0.22            |
| ENSG00000146648                                 | EGFR PPI subnetwork                                               | 0.22            |
| GO:0021697                                      | cerebellar cortex formation                                       | 0.22            |
| ENSG00000198373                                 | WWP2 PPI subnetwork                                               | 0.22            |
| ENSG00000188976                                 | NOC2L PPI subnetwork                                              | 0.22            |
| ENSG00000184863                                 | RBM33 PPI subnetwork                                              | 0.22            |
| GO:0060038                                      | cardiac muscle cell proliferation                                 | 0.22            |
| ENSG00000111605                                 | CPSF6 PPI subnetwork                                              | 0.22            |
| ENSG00000162407                                 | PPAP2B PPI subnetwork                                             | 0.22            |
| ENSG00000135047                                 | CTSL1 PPI subnetwork                                              | 0.22            |
| GO:0004089                                      | carbonate dehydratase activity                                    | 0.22            |
| ENSG00000106397                                 | PLOD3 PPI subnetwork                                              | 0.22            |
| GO:0046466                                      | membrane lipid catabolic process                                  | 0.22            |
| GO:0030149                                      | sphingolipid catabolic process                                    | 0.22            |
| MP:0003983                                      | decreased cholesterol level                                       | 0.22            |
| GO:0050778                                      | positive regulation of immune response                            | 0.22            |
| KEGG_VALINE_LEUCINE_AND_ISOLEUCINE_BIOSYNTHESIS | KEGG_VALINE_LEUCINE_AND_ISOLEUCINE_BIOSYNTHESIS                   | 0.22            |
| MP:0001547                                      | abnormal lipid level                                              | 0.22            |
| ENSG00000184185                                 | KCNJ12 PPI subnetwork                                             | 0.22            |
| ENSG00000168907                                 | PLA2G4F PPI subnetwork                                            | 0.22            |
| ENSG00000131791                                 | PRKAB2 PPI subnetwork                                             | 0.22            |



**Original gene set ID****Original gene set description****Nominal P value**

|                                                 |                                                             |      |
|-------------------------------------------------|-------------------------------------------------------------|------|
| GO:0004252                                      | serine-type endopeptidase activity                          | 0.23 |
| REACTOME_ABCA_TRANSPORTERS_IN_LIPID_HOMEOSTASIS | REACTOME_ABCA_TRANSPORTERS_IN_LIPID_HOMEOSTASIS             | 0.23 |
| ENSG000000124587                                | PEX6 PPI subnetwork                                         | 0.23 |
| GO:0015171                                      | amino acid transmembrane transporter activity               | 0.23 |
| GO:0001569                                      | patterning of blood vessels                                 | 0.23 |
| MP:0006398                                      | increased long bone epiphyseal plate size                   | 0.23 |
| ENSG000000186350                                | RXRA PPI subnetwork                                         | 0.23 |
| ENSG000000140988                                | RPS2 PPI subnetwork                                         | 0.23 |
| GO:0045746                                      | negative regulation of Notch signaling pathway              | 0.23 |
| MP:0000223                                      | decreased monocyte cell number                              | 0.23 |
| GO:0071219                                      | cellular response to molecule of bacterial origin           | 0.23 |
| GO:0002448                                      | mast cell mediated immunity                                 | 0.23 |
| ENSG000000011422                                | PLAUR PPI subnetwork                                        | 0.23 |
| GO:0042439                                      | ethanolamine-containing compound metabolic process          | 0.23 |
| GO:0019901                                      | protein kinase binding                                      | 0.23 |
| ENSG000000141837                                | CACNA1A PPI subnetwork                                      | 0.23 |
| MP:0001891                                      | hydroencephaly                                              | 0.23 |
| ENSG000000175505                                | CLCF1 PPI subnetwork                                        | 0.23 |
| GO:0060589                                      | nucleoside-triphosphatase regulator activity                | 0.23 |
| ENSG000000198641                                | ENSG000000198641 PPI subnetwork                             | 0.23 |
| ENSG000000134070                                | IRAK2 PPI subnetwork                                        | 0.23 |
| GO:0072657                                      | protein localization in membrane                            | 0.23 |
| GO:0035272                                      | exocrine system development                                 | 0.23 |
| GO:0010510                                      | regulation of acetyl-CoA biosynthetic process from pyruvate | 0.23 |
| GO:0006086                                      | acetyl-CoA biosynthetic process from pyruvate               | 0.23 |
| ENSG000000101361                                | NOP56 PPI subnetwork                                        | 0.23 |
| GO:0031667                                      | response to nutrient levels                                 | 0.23 |
| ENSG000000100448                                | CTSG PPI subnetwork                                         | 0.23 |
| ENSG000000174469                                | CNTNAP2 PPI subnetwork                                      | 0.23 |
| ENSG000000172531                                | PPP1CA PPI subnetwork                                       | 0.23 |
| GO:0009086                                      | methionine biosynthetic process                             | 0.23 |
| GO:0030176                                      | integral to endoplasmic reticulum membrane                  | 0.23 |
| GO:0051650                                      | establishment of vesicle localization                       | 0.23 |
| ENSG000000143851                                | PTPN7 PPI subnetwork                                        | 0.23 |
| ENSG000000119812                                | FAM98A PPI subnetwork                                       | 0.23 |
| ENSG000000116711                                | PLA2G4A PPI subnetwork                                      | 0.23 |
| ENSG000000170145                                | SIK2 PPI subnetwork                                         | 0.23 |
| ENSG000000164934                                | DCAF13 PPI subnetwork                                       | 0.23 |
| ENSG000000150337                                | FCGR1A PPI subnetwork                                       | 0.23 |
| ENSG000000171863                                | RPS7 PPI subnetwork                                         | 0.23 |
| MP:0001004                                      | abnormal retinal photoreceptor morphology                   | 0.23 |
| ENSG000000033800                                | PIAS1 PPI subnetwork                                        | 0.23 |
| ENSG000000112715                                | VEGFA PPI subnetwork                                        | 0.23 |
| ENSG000000064703                                | DDX20 PPI subnetwork                                        | 0.23 |
| GO:0035019                                      | somatic stem cell maintenance                               | 0.23 |
| GO:0033673                                      | negative regulation of kinase activity                      | 0.23 |
| GO:0031227                                      | intrinsic to endoplasmic reticulum membrane                 | 0.23 |
| ENSG000000076248                                | UNG PPI subnetwork                                          | 0.23 |
| GO:0009792                                      | embryo development ending in birth or egg hatching          | 0.23 |



| Original gene set ID                                            | Original gene set description                                               | Nominal P value |
|-----------------------------------------------------------------|-----------------------------------------------------------------------------|-----------------|
| GO:0004602                                                      | glutathione peroxidase activity                                             | 0.23            |
| GO:0005765                                                      | lysosomal membrane                                                          | 0.23            |
| GO:0031018                                                      | endocrine pancreas development                                              | 0.23            |
| ENSG00000163879                                                 | DNALI1 PPI subnetwork                                                       | 0.23            |
| GO:0002467                                                      | germinal center formation                                                   | 0.23            |
| ENSG00000111276                                                 | CDKN1B PPI subnetwork                                                       | 0.23            |
| ENSG00000088035                                                 | ALG6 PPI subnetwork                                                         | 0.23            |
| GO:0071222                                                      | cellular response to lipopolysaccharide                                     | 0.23            |
| REACTOME_TAK1_ACTIVATES_NFKB_BY_PHOSPHORYLATION_AND_ACTIVATIO   | REACTOME_TAK1_ACTIVATES_NFKB_BY_PHOSPHORYLATION_AND_ACTIVATION_O            | 0.23            |
| GO:0019953                                                      | sexual reproduction                                                         | 0.23            |
| ENSG00000155868                                                 | MED7 PPI subnetwork                                                         | 0.23            |
| ENSG00000160307                                                 | S100B PPI subnetwork                                                        | 0.23            |
| ENSG00000070193                                                 | FGF10 PPI subnetwork                                                        | 0.23            |
| MP:0001106                                                      | abnormal Schwann cell morphology                                            | 0.23            |
| MP:0001125                                                      | abnormal oocyte morphology                                                  | 0.23            |
| GO:0032870                                                      | cellular response to hormone stimulus                                       | 0.23            |
| GO:0015711                                                      | organic anion transport                                                     | 0.23            |
| MP:0001829                                                      | increased activated T cell number                                           | 0.23            |
| ENSG00000213023                                                 | SYT3 PPI subnetwork                                                         | 0.23            |
| GO:0005868                                                      | cytoplasmic dynein complex                                                  | 0.23            |
| GO:0070371                                                      | ERK1 and ERK2 cascade                                                       | 0.23            |
| GO:0035265                                                      | organ growth                                                                | 0.23            |
| MP:0004804                                                      | decreased susceptibility to autoimmune diabetes                             | 0.23            |
| MP:0008723                                                      | impaired eosinophil recruitment                                             | 0.23            |
| ENSG00000111707                                                 | SUDS3 PPI subnetwork                                                        | 0.23            |
| GO:0060041                                                      | retina development in camera-type eye                                       | 0.23            |
| MP:0003402                                                      | decreased liver weight                                                      | 0.24            |
| GO:0005811                                                      | lipid particle                                                              | 0.24            |
| REACTOME_FATTY_ACYL:COA_BIOSYNTHESIS                            | REACTOME_FATTY_ACYL:COA_BIOSYNTHESIS                                        | 0.24            |
| ENSG00000108298                                                 | RPL19 PPI subnetwork                                                        | 0.24            |
| GO:0043009                                                      | chordate embryonic development                                              | 0.24            |
| GO:0050866                                                      | negative regulation of cell activation                                      | 0.24            |
| GO:0031114                                                      | regulation of microtubule depolymerization                                  | 0.24            |
| ENSG00000101680                                                 | LAMA1 PPI subnetwork                                                        | 0.24            |
| KEGG_NITROGEN_METABOLISM                                        | KEGG_NITROGEN_METABOLISM                                                    | 0.24            |
| MP:0003009                                                      | abnormal cytokine secretion                                                 | 0.24            |
| MP:0003755                                                      | abnormal palate morphology                                                  | 0.24            |
| REACTOME_INHIBITION_OF_REPLICATION_INITIATION_OF_DAMAGED_DNA_BY | REACTOME_INHIBITION_OF_REPLICATION_INITIATION_OF_DAMAGED_DNA_BY_RE          | 0.24            |
| GO:0032259                                                      | methylation                                                                 | 0.24            |
| ENSG00000186081                                                 | KRT5 PPI subnetwork                                                         | 0.24            |
| ENSG00000211614                                                 | ENSG00000211614 PPI subnetwork                                              | 0.24            |
| ENSG00000141736                                                 | ERBB2 PPI subnetwork                                                        | 0.24            |
| ENSG00000165458                                                 | INPPL1 PPI subnetwork                                                       | 0.24            |
| MP:0008721                                                      | abnormal chemokine level                                                    | 0.24            |
| MP:0003071                                                      | decreased vascular permeability                                             | 0.24            |
| MP:0005087                                                      | decreased acute inflammation                                                | 0.24            |
| ENSG00000100294                                                 | MCAT PPI subnetwork                                                         | 0.24            |
| MP:0009789                                                      | decreased susceptibility to bacterial infection induced morbidity/mortality | 0.24            |
| MP:0008080                                                      | abnormal CD8-positive T cell differentiation                                | 0.24            |

| Original gene set ID                                    | Original gene set description                           | Nominal P value |
|---------------------------------------------------------|---------------------------------------------------------|-----------------|
| GO:0007026                                              | negative regulation of microtubule depolymerization     | 0.24            |
| ENSG00000053372                                         | MRTO4 PPI subnetwork                                    | 0.24            |
| ENSG000000141101                                        | NOB1 PPI subnetwork                                     | 0.24            |
| GO:0032386                                              | regulation of intracellular transport                   | 0.24            |
| ENSG000000163166                                        | IWS1 PPI subnetwork                                     | 0.24            |
| MP:0003542                                              | abnormal vascular endothelial cell development          | 0.24            |
| ENSG000000124181                                        | PLCG1 PPI subnetwork                                    | 0.24            |
| ENSG000000138378                                        | STAT4 PPI subnetwork                                    | 0.24            |
| GO:0002576                                              | platelet degranulation                                  | 0.24            |
| MP:0004091                                              | abnormal Z lines                                        | 0.24            |
| MP:0001859                                              | kidney inflammation                                     | 0.24            |
| MP:0001132                                              | absent mature ovarian follicles                         | 0.24            |
| GO:0034097                                              | response to cytokine stimulus                           | 0.24            |
| MP:0003732                                              | abnormal retinal outer plexiform layer morphology       | 0.24            |
| ENSG000000129824                                        | RPS4Y1 PPI subnetwork                                   | 0.24            |
| MP:0001145                                              | abnormal male reproductive system morphology            | 0.24            |
| ENSG000000161638                                        | ITGA5 PPI subnetwork                                    | 0.24            |
| ENSG00000069869                                         | NEDD4 PPI subnetwork                                    | 0.24            |
| ENSG000000082701                                        | GSK3B PPI subnetwork                                    | 0.24            |
| GO:0018205                                              | peptidyl-lysine modification                            | 0.24            |
| GO:0055088                                              | lipid homeostasis                                       | 0.24            |
| GO:0045137                                              | development of primary sexual characteristics           | 0.24            |
| ENSG00000065268                                         | WDR18 PPI subnetwork                                    | 0.24            |
| ENSG000000128052                                        | KDR PPI subnetwork                                      | 0.24            |
| REACTOME_ACTIVATED_TAK1_MEDIATES_P38_MAPK_ACTIVATION    | REACTOME_ACTIVATED_TAK1_MEDIATES_P38_MAPK_ACTIVATION    | 0.24            |
| MP:0003308                                              | abnormal cochlear sensory epithelium morphology         | 0.24            |
| ENSG000000167658                                        | EEF2 PPI subnetwork                                     | 0.24            |
| MP:0005181                                              | decreased circulating estradiol level                   | 0.24            |
| REACTOME_Glutathione_Conjugation                        | REACTOME_Glutathione_Conjugation                        | 0.24            |
| MP:0004392                                              | abnormal CD8-positive T cell physiology                 | 0.24            |
| GO:0042089                                              | cytokine biosynthetic process                           | 0.24            |
| GO:0043499                                              | eukaryotic cell surface binding                         | 0.24            |
| ENSG000000105640                                        | RPL18A PPI subnetwork                                   | 0.24            |
| REACTOME_Ribosomal_Scanning_and_Start_Codon_Recognition | REACTOME_Ribosomal_Scanning_and_Start_Codon_Recognition | 0.24            |
| ENSG000000175899                                        | A2M PPI subnetwork                                      | 0.24            |
| GO:0002695                                              | negative regulation of leukocyte activation             | 0.24            |
| ENSG000000137547                                        | MRPL15 PPI subnetwork                                   | 0.24            |
| GO:0004180                                              | carboxypeptidase activity                               | 0.24            |
| ENSG000000145604                                        | SKP2 PPI subnetwork                                     | 0.24            |
| MP:0009504                                              | abnormal mammary gland epithelium morphology            | 0.24            |
| GO:0031490                                              | chromatin DNA binding                                   | 0.24            |
| MP:0009409                                              | abnormal skeletal muscle fiber type ratio               | 0.24            |
| MP:0003853                                              | dry skin                                                | 0.24            |
| MP:0000243                                              | myoclonus                                               | 0.24            |
| GO:0045577                                              | regulation of B cell differentiation                    | 0.24            |
| GO:0043409                                              | negative regulation of MAPK cascade                     | 0.24            |
| GO:0032101                                              | regulation of response to external stimulus             | 0.24            |
| MP:0002855                                              | abnormal cochlear ganglion morphology                   | 0.24            |
| GO:0050308                                              | sugar-phosphatase activity                              | 0.24            |

| Original gene set ID                                         | Original gene set description                                    | Nominal P value |
|--------------------------------------------------------------|------------------------------------------------------------------|-----------------|
| GO:0019203                                                   | carbohydrate phosphatase activity                                | 0.24            |
| GO:0030217                                                   | T cell differentiation                                           | 0.24            |
| REACTOME_RIG:IMDA5_MEDIATED_INDUCION_OF_IFN:ALPHABETA_PATHWA | REACTOME_RIG:IMDA5_MEDIATED_INDUCION_OF_IFN:ALPHABETA_PATHWAYS   | 0.24            |
| MP:0000162                                                   | lordosis                                                         | 0.24            |
| GO:0046649                                                   | lymphocyte activation                                            | 0.24            |
| ENSG00000170248                                              | PDCD61P PPI subnetwork                                           | 0.24            |
| ENSG000000089597                                             | GANAB PPI subnetwork                                             | 0.24            |
| ENSG00000185630                                              | PBX1 PPI subnetwork                                              | 0.24            |
| GO:0002886                                                   | regulation of myeloid leukocyte mediated immunity                | 0.24            |
| ENSG00000044524                                              | EPHA3 PPI subnetwork                                             | 0.24            |
| GO:0006497                                                   | protein lipidation                                               | 0.24            |
| GO:0033017                                                   | sarcoplasmic reticulum membrane                                  | 0.24            |
| REACTOME_TRAF6_MEDIATED_IRF7_ACTIVATION                      | REACTOME_TRAF6_MEDIATED_IRF7_ACTIVATION                          | 0.24            |
| ENSG00000164362                                              | TERT PPI subnetwork                                              | 0.24            |
| ENSG00000148082                                              | SHC3 PPI subnetwork                                              | 0.24            |
| GO:0044452                                                   | nucleolar part                                                   | 0.24            |
| GO:0005200                                                   | structural constituent of cytoskeleton                           | 0.24            |
| MP:0000784                                                   | forebrain hypoplasia                                             | 0.24            |
| REACTOME_TRANSPORT_OF_VITAMINS_NUCLEOSIDES_AND_RELATED_MOLEC | REACTOME_TRANSPORT_OF_VITAMINS_NUCLEOSIDES_AND_RELATED_MOLECULE: | 0.24            |
| GO:0008138                                                   | protein tyrosine/serine/threonine phosphatase activity           | 0.24            |
| ENSG00000173406                                              | DAB1 PPI subnetwork                                              | 0.24            |
| GO:0042056                                                   | chemoattractant activity                                         | 0.24            |
| MP:0010825                                                   | abnormal lung saccule morphology                                 | 0.24            |
| ENSG000000075388                                             | FGF4 PPI subnetwork                                              | 0.24            |
| ENSG00000008988                                              | RPS20 PPI subnetwork                                             | 0.24            |
| GO:0006270                                                   | DNA-dependent DNA replication initiation                         | 0.24            |
| ENSG00000122484                                              | RPAP2 PPI subnetwork                                             | 0.24            |
| GO:0048608                                                   | reproductive structure development                               | 0.24            |
| ENSG00000152556                                              | PFKM PPI subnetwork                                              | 0.24            |
| ENSG00000104267                                              | CA2 PPI subnetwork                                               | 0.24            |
| ENSG00000168028                                              | RPSA PPI subnetwork                                              | 0.24            |
| MP:0005508                                                   | abnormal skeleton morphology                                     | 0.24            |
| GO:0003229                                                   | ventricular cardiac muscle tissue development                    | 0.24            |
| ENSG00000133703                                              | KRAS PPI subnetwork                                              | 0.24            |
| MP:0001304                                                   | cataracts                                                        | 0.24            |
| MP:0002765                                                   | short fibula                                                     | 0.24            |
| ENSG00000005844                                              | ITGAL PPI subnetwork                                             | 0.24            |
| MP:0003641                                                   | small lung                                                       | 0.24            |
| ENSG00000160741                                              | CRTC2 PPI subnetwork                                             | 0.24            |
| GO:0046474                                                   | glycerophospholipid biosynthetic process                         | 0.24            |
| GO:0006633                                                   | fatty acid biosynthetic process                                  | 0.24            |
| ENSG00000169067                                              | ACTBL2 PPI subnetwork                                            | 0.24            |
| MP:0002416                                                   | abnormal proerythroblast morphology                              | 0.24            |
| ENSG00000158874                                              | APOA2 PPI subnetwork                                             | 0.24            |
| ENSG00000204843                                              | DCTN1 PPI subnetwork                                             | 0.24            |
| ENSG00000064601                                              | CTSA PPI subnetwork                                              | 0.24            |
| MP:0008135                                                   | small Peyer's patches                                            | 0.24            |
| MP:0009655                                                   | abnormal secondary palate development                            | 0.24            |
| ENSG00000164251                                              | F2RL1 PPI subnetwork                                             | 0.25            |

| Original gene set ID            | Original gene set description                                    | Nominal P value |
|---------------------------------|------------------------------------------------------------------|-----------------|
| GO:0034505                      | tooth mineralization                                             | 0.25            |
| ENSG00000110700                 | RPS13 PPI subnetwork                                             | 0.25            |
| ENSG00000168454                 | TXNDC2 PPI subnetwork                                            | 0.25            |
| GO:0006469                      | negative regulation of protein kinase activity                   | 0.25            |
| REACTOME_VIRAL_MRNA_TRANSLATION | REACTOME_VIRAL_MRNA_TRANSLATION                                  | 0.25            |
| MP:0005503                      | abnormal tendon morphology                                       | 0.25            |
| GO:0035924                      | cellular response to vascular endothelial growth factor stimulus | 0.25            |
| ENSG00000100302                 | RASD2 PPI subnetwork                                             | 0.25            |
| MP:0000276                      | heart right ventricle hypertrophy                                | 0.25            |
| ENSG00000167978                 | SRRM2 PPI subnetwork                                             | 0.25            |
| GO:0000097                      | sulfur amino acid biosynthetic process                           | 0.25            |
| MP:0008720                      | impaired neutrophil chemotaxis                                   | 0.25            |
| GO:0001525                      | angiogenesis                                                     | 0.25            |
| MP:0008133                      | decreased Peyer's patch number                                   | 0.25            |
| GO:2001014                      | regulation of skeletal muscle cell differentiation               | 0.25            |
| GO:0008236                      | serine-type peptidase activity                                   | 0.25            |
| GO:0003743                      | translation initiation factor activity                           | 0.25            |
| ENSG00000162409                 | PRKAA2 PPI subnetwork                                            | 0.25            |
| ENSG00000105197                 | TIMM50 PPI subnetwork                                            | 0.25            |
| ENSG00000164338                 | UTP15 PPI subnetwork                                             | 0.25            |
| MP:0005168                      | abnormal female meiosis                                          | 0.25            |
| MP:0002563                      | shortened circadian period                                       | 0.25            |
| ENSG00000166862                 | CACNG2 PPI subnetwork                                            | 0.25            |
| ENSG00000110987                 | BCL7A PPI subnetwork                                             | 0.25            |
| MP:0003945                      | abnormal lymphocyte physiology                                   | 0.25            |
| ENSG00000082175                 | PGR PPI subnetwork                                               | 0.25            |
| GO:0001725                      | stress fiber                                                     | 0.25            |
| GO:0002521                      | leukocyte differentiation                                        | 0.25            |
| GO:0006475                      | internal protein amino acid acetylation                          | 0.25            |
| GO:0042306                      | regulation of protein import into nucleus                        | 0.25            |
| GO:0005902                      | microvillus                                                      | 0.25            |
| MP:0001245                      | thick dermal layer                                               | 0.25            |
| ENSG00000197498                 | RPF2 PPI subnetwork                                              | 0.25            |
| GO:0019229                      | regulation of vasoconstriction                                   | 0.25            |
| MP:0001211                      | wrinkled skin                                                    | 0.25            |
| ENSG00000134398                 | ERN2 PPI subnetwork                                              | 0.25            |
| MP:0005093                      | decreased B cell proliferation                                   | 0.25            |
| ENSG00000067842                 | ATP2B3 PPI subnetwork                                            | 0.25            |
| GO:0016592                      | mediator complex                                                 | 0.25            |
| MP:0001712                      | abnormal placenta development                                    | 0.25            |
| ENSG00000161016                 | RPL8 PPI subnetwork                                              | 0.25            |
| ENSG00000136485                 | DCAF7 PPI subnetwork                                             | 0.25            |
| MP:0000762                      | abnormal tongue morphology                                       | 0.25            |
| GO:0006903                      | vesicle targeting                                                | 0.25            |
| GO:0043596                      | nuclear replication fork                                         | 0.25            |
| ENSG00000215467                 | ENSG00000215467 PPI subnetwork                                   | 0.25            |
| GO:0051261                      | protein depolymerization                                         | 0.25            |
| MP:0005058                      | abnormal lysosome morphology                                     | 0.25            |
| GO:0005773                      | vacuole                                                          | 0.25            |



| Original gene set ID                         | Original gene set description                                    | Nominal P value |
|----------------------------------------------|------------------------------------------------------------------|-----------------|
| GO:0006639                                   | acylglycerol metabolic process                                   | 0.25            |
| ENSG00000108061                              | SHOC2 PPI subnetwork                                             | 0.25            |
| ENSG00000145592                              | RPL37 PPI subnetwork                                             | 0.25            |
| ENSG00000197746                              | PSAP PPI subnetwork                                              | 0.25            |
| MP:0011101                                   | partial prenatal lethality                                       | 0.25            |
| ENSG00000165271                              | NOL6 PPI subnetwork                                              | 0.25            |
| ENSG00000108262                              | GIT1 PPI subnetwork                                              | 0.25            |
| ENSG00000070759                              | TESK2 PPI subnetwork                                             | 0.25            |
| GO:0007219                                   | Notch signaling pathway                                          | 0.25            |
| ENSG00000106799                              | TGFBR1 PPI subnetwork                                            | 0.25            |
| MP:0008082                                   | increased single-positive T cell number                          | 0.25            |
| MP:0008519                                   | thin retinal outer plexiform layer                               | 0.25            |
| GO:0001914                                   | regulation of T cell mediated cytotoxicity                       | 0.25            |
| GO:0055123                                   | digestive system development                                     | 0.25            |
| ENSG00000109472                              | CPE PPI subnetwork                                               | 0.25            |
| GO:0004012                                   | phospholipid-translocating ATPase activity                       | 0.25            |
| GO:0006865                                   | amino acid transport                                             | 0.25            |
| GO:0042698                                   | ovulation cycle                                                  | 0.25            |
| ENSG00000126522                              | ASL PPI subnetwork                                               | 0.25            |
| ENSG00000056678                              | ENSG00000056678 PPI subnetwork                                   | 0.25            |
| ENSG00000204197                              | KIFC1 PPI subnetwork                                             | 0.25            |
| GO:0014855                                   | striated muscle cell proliferation                               | 0.25            |
| GO:0022627                                   | cytosolic small ribosomal subunit                                | 0.25            |
| ENSG00000205571                              | SMN2 PPI subnetwork                                              | 0.25            |
| ENSG00000172062                              | SMN1 PPI subnetwork                                              | 0.25            |
| ENSG00000168811                              | IL12A PPI subnetwork                                             | 0.25            |
| ENSG00000118181                              | RPS25 PPI subnetwork                                             | 0.25            |
| GO:0005901                                   | caveola                                                          | 0.25            |
| GO:0060419                                   | heart growth                                                     | 0.25            |
| GO:0071436                                   | sodium ion export                                                | 0.25            |
| MP:0003935                                   | abnormal craniofacial development                                | 0.25            |
| ENSG00000105953                              | OGDH PPI subnetwork                                              | 0.25            |
| REACTOME_SPHINGOLIPID_METABOLISM             | REACTOME_SPHINGOLIPID_METABOLISM                                 | 0.25            |
| ENSG00000177301                              | KCNA2 PPI subnetwork                                             | 0.25            |
| MP:0008070                                   | absent T cells                                                   | 0.25            |
| ENSG00000140284                              | SLC27A2 PPI subnetwork                                           | 0.25            |
| GO:0001917                                   | photoreceptor inner segment                                      | 0.25            |
| ENSG00000089159                              | PXN PPI subnetwork                                               | 0.25            |
| MP:0005236                                   | abnormal olfactory nerve morphology                              | 0.26            |
| GO:0042626                                   | ATPase activity, coupled to transmembrane movement of substances | 0.26            |
| GO:0019058                                   | viral infectious cycle                                           | 0.26            |
| GO:0008340                                   | determination of adult lifespan                                  | 0.26            |
| GO:0043543                                   | protein acylation                                                | 0.26            |
| MP:0000607                                   | abnormal hepatocyte morphology                                   | 0.26            |
| GO:0004867                                   | serine-type endopeptidase inhibitor activity                     | 0.26            |
| ENSG00000135372                              | NAT10 PPI subnetwork                                             | 0.26            |
| KEGG_BIOSYNTHESIS_OF_UNSATURATED_FATTY_ACIDS | KEGG_BIOSYNTHESIS_OF_UNSATURATED_FATTY_ACIDS                     | 0.26            |
| GO:0015749                                   | monosaccharide transport                                         | 0.26            |
| ENSG00000101773                              | RBBP8 PPI subnetwork                                             | 0.26            |

| Original gene set ID                                           | Original gene set description                                  | Nominal P value |
|----------------------------------------------------------------|----------------------------------------------------------------|-----------------|
| ENSG00000082146                                                | STRADB PPI subnetwork                                          | 0.26            |
| ENSG00000137713                                                | PPP2R1B PPI subnetwork                                         | 0.26            |
| ENSG00000117133                                                | RPF1 PPI subnetwork                                            | 0.26            |
| GO:0016581                                                     | NuRD complex                                                   | 0.26            |
| GO:0048705                                                     | skeletal system morphogenesis                                  | 0.26            |
| REACTOME_SIGNALING_BY_NOTCH                                    | REACTOME_SIGNALING_BY_NOTCH                                    | 0.26            |
| ENSG00000116473                                                | RAP1A PPI subnetwork                                           | 0.26            |
| ENSG00000174791                                                | RIN1 PPI subnetwork                                            | 0.26            |
| GO:0045940                                                     | positive regulation of steroid metabolic process               | 0.26            |
| MP:0002026                                                     | leukemia                                                       | 0.26            |
| GO:0048200                                                     | Golgi transport vesicle coating                                | 0.26            |
| GO:0035964                                                     | COPI-coated vesicle budding                                    | 0.26            |
| GO:0048205                                                     | COPI coating of Golgi vesicle                                  | 0.26            |
| MP:0008537                                                     | increased susceptibility to induced colitis                    | 0.26            |
| GO:0042157                                                     | lipoprotein metabolic process                                  | 0.26            |
| MP:0000596                                                     | abnormal liver development                                     | 0.26            |
| REACTOME_MITOCHONDRIAL_TRNA_AMINOACYLATION                     | REACTOME_MITOCHONDRIAL_TRNA_AMINOACYLATION                     | 0.26            |
| REACTOME_FATTY_ACID_TRIACYLGLYCEROL_AND_KETONE_BODY_METABOLISM | REACTOME_FATTY_ACID_TRIACYLGLYCEROL_AND_KETONE_BODY_METABOLISM | 0.26            |
| ENSG00000136383                                                | ALPK3 PPI subnetwork                                           | 0.26            |
| ENSG00000121274                                                | PAPD5 PPI subnetwork                                           | 0.26            |
| ENSG00000115170                                                | ACVR1 PPI subnetwork                                           | 0.26            |
| ENSG00000128731                                                | HERC2 PPI subnetwork                                           | 0.26            |
| MP:0011086                                                     | partial postnatal lethality                                    | 0.26            |
| GO:0004725                                                     | protein tyrosine phosphatase activity                          | 0.26            |
| MP:0000091                                                     | short premaxilla                                               | 0.26            |
| ENSG00000069399                                                | BCL3 PPI subnetwork                                            | 0.26            |
| MP:0002980                                                     | abnormal postural reflex                                       | 0.26            |
| ENSG00000164404                                                | GDF9 PPI subnetwork                                            | 0.26            |
| GO:0008376                                                     | acetylgalactosaminyltransferase activity                       | 0.26            |
| GO:0005247                                                     | voltage-gated chloride channel activity                        | 0.26            |
| ENSG00000166025                                                | AMOTL1 PPI subnetwork                                          | 0.26            |
| ENSG00000108821                                                | COL1A1 PPI subnetwork                                          | 0.26            |
| ENSG00000078304                                                | PPP2R5C PPI subnetwork                                         | 0.26            |
| ENSG00000103502                                                | CDIPT PPI subnetwork                                           | 0.26            |
| GO:0045321                                                     | leukocyte activation                                           | 0.26            |
| GO:0005614                                                     | interstitial matrix                                            | 0.26            |
| ENSG00000196549                                                | MME PPI subnetwork                                             | 0.26            |
| ENSG00000124788                                                | ATXN1 PPI subnetwork                                           | 0.26            |
| ENSG00000166603                                                | MC4R PPI subnetwork                                            | 0.26            |
| REACTOME_ADAPTIVE_IMMUNE_SYSTEM                                | REACTOME_ADAPTIVE_IMMUNE_SYSTEM                                | 0.26            |
| ENSG00000120690                                                | ELF1 PPI subnetwork                                            | 0.26            |
| MP:0005036                                                     | diarrhea                                                       | 0.26            |
| ENSG00000198785                                                | GRIN3A PPI subnetwork                                          | 0.26            |
| ENSG00000162736                                                | NCSTN PPI subnetwork                                           | 0.26            |
| GO:0030173                                                     | integral to Golgi membrane                                     | 0.26            |
| MP:0010402                                                     | ventricular septal defect                                      | 0.26            |
| GO:0007229                                                     | integrin-mediated signaling pathway                            | 0.26            |
| GO:0006700                                                     | C21-steroid hormone biosynthetic process                       | 0.26            |
| ENSG00000106366                                                | SERPINE1 PPI subnetwork                                        | 0.26            |

| Original gene set ID                                               | Original gene set description                                                    | Nominal P value |
|--------------------------------------------------------------------|----------------------------------------------------------------------------------|-----------------|
| MP:0009230                                                         | abnormal sperm head morphology                                                   | 0.26            |
| ENSG00000091127                                                    | PUS7 PPI subnetwork                                                              | 0.26            |
| ENSG00000065427                                                    | KARS PPI subnetwork                                                              | 0.26            |
| GO:0005057                                                         | receptor signaling protein activity                                              | 0.26            |
| ENSG00000128050                                                    | PAICS PPI subnetwork                                                             | 0.26            |
| ENSG00000198242                                                    | RPL23A PPI subnetwork                                                            | 0.26            |
| ENSG00000075886                                                    | TUBA3D PPI subnetwork                                                            | 0.26            |
| ENSG00000198033                                                    | TUBA3C PPI subnetwork                                                            | 0.26            |
| GO:0006473                                                         | protein acetylation                                                              | 0.26            |
| ENSG00000186832                                                    | KRT16 PPI subnetwork                                                             | 0.26            |
| KEGG_JAK_STAT_SIGNALING_PATHWAY                                    | KEGG_JAK_STAT_SIGNALING_PATHWAY                                                  | 0.26            |
| ENSG00000108312                                                    | UBTF PPI subnetwork                                                              | 0.26            |
| MP:0002874                                                         | decreased hemoglobin content                                                     | 0.26            |
| MP:0000467                                                         | abnormal esophagus morphology                                                    | 0.26            |
| ENSG00000108510                                                    | MED13 PPI subnetwork                                                             | 0.26            |
| MP:0008476                                                         | increased spleen red pulp amount                                                 | 0.26            |
| MP:0008525                                                         | decreased cranium height                                                         | 0.26            |
| ENSG00000101421                                                    | CHMP4B PPI subnetwork                                                            | 0.26            |
| MP:0004794                                                         | increased anti-nuclear antigen antibody leve                                     | 0.26            |
| ENSG00000166233                                                    | ARIH1 PPI subnetwork                                                             | 0.26            |
| ENSG00000116044                                                    | NFE2L2 PPI subnetwork                                                            | 0.26            |
| GO:0004859                                                         | phospholipase inhibitor activity                                                 | 0.26            |
| ENSG00000103089                                                    | FA2H PPI subnetwork                                                              | 0.26            |
| MP:0003717                                                         | pallor                                                                           | 0.26            |
| GO:0015149                                                         | hexose transmembrane transporter activity                                        | 0.26            |
| ENSG00000205609                                                    | EIF3CL PPI subnetwork                                                            | 0.26            |
| GO:0034062                                                         | RNA polymerase activity                                                          | 0.26            |
| GO:0003899                                                         | DNA-directed RNA polymerase activity                                             | 0.26            |
| MP:0008499                                                         | increased IgG1 level                                                             | 0.26            |
| ENSG00000105141                                                    | CASP14 PPI subnetwork                                                            | 0.26            |
| ENSG00000100934                                                    | SEC23A PPI subnetwork                                                            | 0.26            |
| ENSG00000054267                                                    | ARID4B PPI subnetwork                                                            | 0.26            |
| GO:0034367                                                         | macromolecular complex remodeling                                                | 0.26            |
| GO:0034368                                                         | protein-lipid complex remodeling                                                 | 0.26            |
| GO:0034369                                                         | plasma lipoprotein particle remodeling                                           | 0.26            |
| ENSG00000099985                                                    | OSM PPI subnetwork                                                               | 0.26            |
| GO:0033764                                                         | steroid dehydrogenase activity, acting on the CH-OH group of donors, NAD or NADP | 0.26            |
| ENSG00000186831                                                    | ENSG00000186831 PPI subnetwork                                                   | 0.26            |
| ENSG00000188763                                                    | FZD9 PPI subnetwork                                                              | 0.26            |
| REACTOME_INNATE_IMMUNE_SYSTEM                                      | REACTOME_INNATE_IMMUNE_SYSTEM                                                    | 0.26            |
| ENSG00000128245                                                    | YWHAH PPI subnetwork                                                             | 0.26            |
| REACTOME_NUCLEAR_EVENTS_KINASE_AND_TRANSCRIPTION_FACTOR_ACTIVATION | REACTOME_NUCLEAR_EVENTS_KINASE_AND_TRANSCRIPTION_FACTOR_ACTIVATION               | 0.26            |
| MP:0002344                                                         | abnormal lymph node B cell domain morphology                                     | 0.26            |
| ENSG00000111652                                                    | COPS7A PPI subnetwork                                                            | 0.26            |
| ENSG00000155760                                                    | FZD7 PPI subnetwork                                                              | 0.26            |
| GO:0002218                                                         | activation of innate immune response                                             | 0.26            |
| MP:0000550                                                         | abnormal forelimb morphology                                                     | 0.26            |
| MP:0001272                                                         | increased metastatic potential                                                   | 0.26            |
| ENSG00000186716                                                    | BCR PPI subnetwork                                                               | 0.26            |





**Original gene set ID****Original gene set description****Nominal P value**

|                                  |                                                          |      |
|----------------------------------|----------------------------------------------------------|------|
| MP:0001152                       | Leydig cell hyperplasia                                  | 0.27 |
| ENSG00000113712                  | CSNK1A1 PPI subnetwork                                   | 0.27 |
| ENSG00000125508                  | SRMS PPI subnetwork                                      | 0.27 |
| ENSG00000060140                  | STYK1 PPI subnetwork                                     | 0.27 |
| GO:0007596                       | blood coagulation                                        | 0.27 |
| GO:0045638                       | negative regulation of myeloid cell differentiation      | 0.27 |
| ENSG00000106355                  | LSM5 PPI subnetwork                                      | 0.27 |
| GO:0045089                       | positive regulation of innate immune response            | 0.27 |
| ENSG00000132155                  | RAF1 PPI subnetwork                                      | 0.27 |
| GO:0048635                       | negative regulation of muscle organ development          | 0.27 |
| ENSG00000119689                  | DLST PPI subnetwork                                      | 0.27 |
| GO:0016493                       | C-C chemokine receptor activity                          | 0.27 |
| ENSG00000105993                  | DNAJB6 PPI subnetwork                                    | 0.27 |
| GO:0005112                       | Notch binding                                            | 0.27 |
| MP:0003135                       | increased erythroid progenitor cell number               | 0.27 |
| REACTOME_RECYCLING_PATHWAY_OF_L1 | REACTOME_RECYCLING_PATHWAY_OF_L1                         | 0.27 |
| GO:0071565                       | nBAF complex                                             | 0.27 |
| ENSG00000186111                  | PIP5K1C PPI subnetwork                                   | 0.27 |
| ENSG00000106344                  | RBM28 PPI subnetwork                                     | 0.27 |
| GO:0009168                       | purine ribonucleoside monophosphate biosynthetic process | 0.27 |
| GO:0009127                       | purine nucleoside monophosphate biosynthetic process     | 0.27 |
| GO:0050817                       | coagulation                                              | 0.27 |
| GO:0042310                       | vasoconstriction                                         | 0.27 |
| MP:0000854                       | abnormal cerebellum development                          | 0.27 |
| ENSG00000111731                  | KIAA0528 PPI subnetwork                                  | 0.27 |
| ENSG00000132589                  | FLOT2 PPI subnetwork                                     | 0.27 |
| ENSG00000130669                  | PAK4 PPI subnetwork                                      | 0.27 |
| MP:0008770                       | decreased survivor rate                                  | 0.27 |
| MP:0002796                       | impaired skin barrier function                           | 0.27 |
| GO:0045445                       | myoblast differentiation                                 | 0.27 |
| GO:0006446                       | regulation of translational initiation                   | 0.27 |
| GO:0005355                       | glucose transmembrane transporter activity               | 0.27 |
| ENSG00000101040                  | ZMYND8 PPI subnetwork                                    | 0.27 |
| GO:0046470                       | phosphatidylcholine metabolic process                    | 0.27 |
| GO:0045619                       | regulation of lymphocyte differentiation                 | 0.27 |
| MP:0005309                       | increased circulating ammonia level                      | 0.27 |
| GO:0070325                       | lipoprotein particle receptor binding                    | 0.27 |
| GO:0071577                       | zinc ion transmembrane transport                         | 0.27 |
| ENSG00000105438                  | KDELR1 PPI subnetwork                                    | 0.27 |
| ENSG00000197756                  | RPL37A PPI subnetwork                                    | 0.27 |
| MP:0000026                       | abnormal inner ear morphology                            | 0.27 |
| GO:0016805                       | dipeptidase activity                                     | 0.27 |
| ENSG00000023191                  | RNH1 PPI subnetwork                                      | 0.27 |
| ENSG00000169682                  | SPNS1 PPI subnetwork                                     | 0.27 |
| ENSG00000165280                  | VCP PPI subnetwork                                       | 0.27 |
| GO:0019199                       | transmembrane receptor protein kinase activity           | 0.27 |
| GO:0002683                       | negative regulation of immune system process             | 0.27 |
| GO:0007599                       | hemostasis                                               | 0.27 |
| ENSG00000100393                  | EP300 PPI subnetwork                                     | 0.27 |

| Original gene set ID                                                                                             | Original gene set description                                                                                    | Nominal P value |
|------------------------------------------------------------------------------------------------------------------|------------------------------------------------------------------------------------------------------------------|-----------------|
| ENSG00000104517                                                                                                  | UBR5 PPI subnetwork                                                                                              | 0.27            |
| GO:0022829                                                                                                       | wide pore channel activity                                                                                       | 0.27            |
| ENSG00000092208                                                                                                  | GEMIN2 PPI subnetwork                                                                                            | 0.27            |
| MP:0008597                                                                                                       | decreased circulating interleukin-6 level                                                                        | 0.27            |
| MP:0008395                                                                                                       | abnormal osteoblast differentiation                                                                              | 0.27            |
| ENSG00000140319                                                                                                  | SRP14 PPI subnetwork                                                                                             | 0.27            |
| ENSG00000137818                                                                                                  | RPLP1 PPI subnetwork                                                                                             | 0.27            |
| ENSG00000198034                                                                                                  | RPS4X PPI subnetwork                                                                                             | 0.27            |
| REACTOME_NONSENSE_MEDIATED_DECAY_INDEPENDENT_OF_THE_EXON_JUNCTION                                                | REACTOME_NONSENSE_MEDIATED_DECAY_INDEPENDENT_OF_THE_EXON_JUNCTION                                                | 0.27            |
| MP:0004952                                                                                                       | increased spleen weight                                                                                          | 0.27            |
| GO:0009161                                                                                                       | ribonucleoside monophosphate metabolic process                                                                   | 0.27            |
| GO:0006367                                                                                                       | transcription initiation from RNA polymerase II promoter                                                         | 0.27            |
| REACTOME_TRAF6_MEDIATED_INDUCTION_OF_NFKB_AND_MAP_KINASES_UPON_ACTIVATION_OF_TOLL_LIKE_RECEPTOR_78_TLR78_CASCADE | REACTOME_TRAF6_MEDIATED_INDUCTION_OF_NFKB_AND_MAP_KINASES_UPON_ACTIVATION_OF_TOLL_LIKE_RECEPTOR_78_TLR78_CASCADE | 0.27            |
| REACTOME_MYD88_DEPENDENT_CASCADE_INITIATED_ON_ENDOSOME                                                           | REACTOME_MYD88_DEPENDENT_CASCADE_INITIATED_ON_ENDOSOME                                                           | 0.27            |
| GO:0019208                                                                                                       | phosphatase regulator activity                                                                                   | 0.27            |
| MP:0003077                                                                                                       | abnormal cell cycle                                                                                              | 0.27            |
| ENSG00000139626                                                                                                  | ITGB7 PPI subnetwork                                                                                             | 0.27            |
| ENSG00000184787                                                                                                  | UBE2G2 PPI subnetwork                                                                                            | 0.27            |
| GO:0030949                                                                                                       | positive regulation of vascular endothelial growth factor receptor signaling pathway                             | 0.27            |
| MP:0001533                                                                                                       | abnormal skeleton physiology                                                                                     | 0.27            |
| MP:0002075                                                                                                       | abnormal coat/hair pigmentation                                                                                  | 0.27            |
| ENSG00000145912                                                                                                  | NHP2 PPI subnetwork                                                                                              | 0.27            |
| GO:0055010                                                                                                       | ventricular cardiac muscle tissue morphogenesis                                                                  | 0.27            |
| GO:0006814                                                                                                       | sodium ion transport                                                                                             | 0.27            |
| ENSG00000131368                                                                                                  | MRPS25 PPI subnetwork                                                                                            | 0.27            |
| GO:0045120                                                                                                       | pronucleus                                                                                                       | 0.27            |
| MP:0005092                                                                                                       | decreased double-positive T cell number                                                                          | 0.27            |
| ENSG00000078808                                                                                                  | SDF4 PPI subnetwork                                                                                              | 0.27            |
| ENSG00000198873                                                                                                  | GRK5 PPI subnetwork                                                                                              | 0.27            |
| ENSG00000160584                                                                                                  | SIK3 PPI subnetwork                                                                                              | 0.27            |
| KEGG_PYRUVATE_METABOLISM                                                                                         | KEGG_PYRUVATE_METABOLISM                                                                                         | 0.27            |
| MP:0003068                                                                                                       | enlarged kidney                                                                                                  | 0.27            |
| GO:0051591                                                                                                       | response to cAMP                                                                                                 | 0.27            |
| ENSG00000116030                                                                                                  | SUMO1 PPI subnetwork                                                                                             | 0.27            |
| GO:0031012                                                                                                       | extracellular matrix                                                                                             | 0.27            |
| ENSG00000150990                                                                                                  | DHX37 PPI subnetwork                                                                                             | 0.27            |
| ENSG00000075618                                                                                                  | FSCN1 PPI subnetwork                                                                                             | 0.27            |
| GO:0045814                                                                                                       | negative regulation of gene expression, epigenetic                                                               | 0.27            |
| GO:0015893                                                                                                       | drug transport                                                                                                   | 0.27            |
| ENSG00000115705                                                                                                  | TPO PPI subnetwork                                                                                               | 0.27            |
| ENSG00000185920                                                                                                  | PTCH1 PPI subnetwork                                                                                             | 0.27            |
| ENSG00000115221                                                                                                  | ITGB6 PPI subnetwork                                                                                             | 0.28            |
| GO:0007422                                                                                                       | peripheral nervous system development                                                                            | 0.28            |
| ENSG00000031698                                                                                                  | SARS PPI subnetwork                                                                                              | 0.28            |
| MP:0003270                                                                                                       | intestinal obstruction                                                                                           | 0.28            |
| GO:0048534                                                                                                       | hemopoietic or lymphoid organ development                                                                        | 0.28            |
| ENSG00000150760                                                                                                  | DOCK1 PPI subnetwork                                                                                             | 0.28            |
| GO:0016741                                                                                                       | transferase activity, transferring one-carbon groups                                                             | 0.28            |

| Original gene set ID                          | Original gene set description                                         | Nominal P value |
|-----------------------------------------------|-----------------------------------------------------------------------|-----------------|
| GO:0042974                                    | retinoic acid receptor binding                                        | 0.28            |
| MP:0001259                                    | abnormal body weight                                                  | 0.28            |
| MP:0004993                                    | decreased bone resorption                                             | 0.28            |
| GO:0000228                                    | nuclear chromosome                                                    | 0.28            |
| MP:0008481                                    | increased spleen germinal center number                               | 0.28            |
| GO:0007431                                    | salivary gland development                                            | 0.28            |
| ENSG00000198554                               | WDHD1 PPI subnetwork                                                  | 0.28            |
| ENSG00000100324                               | TAB1 PPI subnetwork                                                   | 0.28            |
| ENSG00000160469                               | BRSK1 PPI subnetwork                                                  | 0.28            |
| GO:0045668                                    | negative regulation of osteoblast differentiation                     | 0.28            |
| MP:0008174                                    | decreased follicular B cell number                                    | 0.28            |
| ENSG00000043462                               | LCP2 PPI subnetwork                                                   | 0.28            |
| ENSG00000188153                               | COL4A5 PPI subnetwork                                                 | 0.28            |
| ENSG00000067057                               | PFKP PPI subnetwork                                                   | 0.28            |
| GO:0005518                                    | collagen binding                                                      | 0.28            |
| ENSG00000092847                               | EIF2C1 PPI subnetwork                                                 | 0.28            |
| ENSG00000180210                               | F2 PPI subnetwork                                                     | 0.28            |
| ENSG00000163251                               | FZD5 PPI subnetwork                                                   | 0.28            |
| ENSG00000078295                               | ADCY2 PPI subnetwork                                                  | 0.28            |
| ENSG00000149806                               | FAU PPI subnetwork                                                    | 0.28            |
| ENSG00000129460                               | NGDN PPI subnetwork                                                   | 0.28            |
| GO:0019083                                    | viral transcription                                                   | 0.28            |
| GO:0019080                                    | viral genome expression                                               | 0.28            |
| ENSG00000118579                               | MED28 PPI subnetwork                                                  | 0.28            |
| ENSG00000101412                               | E2F1 PPI subnetwork                                                   | 0.28            |
| GO:2000116                                    | regulation of cysteine-type endopeptidase activity                    | 0.28            |
| MP:0006325                                    | impaired hearing                                                      | 0.28            |
| GO:0070328                                    | triglyceride homeostasis                                              | 0.28            |
| GO:0007250                                    | activation of NF-kappaB-inducing kinase activity                      | 0.28            |
| REACTOME_FGFR3_LIGAND_BINDING_AND_ACTIVATION  | REACTOME_FGFR3_LIGAND_BINDING_AND_ACTIVATION                          | 0.28            |
| REACTOME_FGFR3C_LIGAND_BINDING_AND_ACTIVATION | REACTOME_FGFR3C_LIGAND_BINDING_AND_ACTIVATION                         | 0.28            |
| ENSG00000007047                               | MARK4 PPI subnetwork                                                  | 0.28            |
| ENSG00000112304                               | ACOT13 PPI subnetwork                                                 | 0.28            |
| ENSG00000125691                               | RPL23 PPI subnetwork                                                  | 0.28            |
| MP:0004800                                    | decreased susceptibility to experimental autoimmune encephalomyelitis | 0.28            |
| GO:0052547                                    | regulation of peptidase activity                                      | 0.28            |
| ENSG00000107625                               | DDX50 PPI subnetwork                                                  | 0.28            |
| MP:0000711                                    | thymus cortex hypoplasia                                              | 0.28            |
| GO:0015295                                    | solute:hydrogen symporter activity                                    | 0.28            |
| ENSG00000164104                               | HMGB2 PPI subnetwork                                                  | 0.28            |
| ENSG00000163902                               | RPN1 PPI subnetwork                                                   | 0.28            |
| GO:0008329                                    | pattern recognition receptor activity                                 | 0.28            |
| MP:0011098                                    | complete embryonic lethality during organogenesis                     | 0.28            |
| MP:0002389                                    | abnormal Peyer's patch follicle morphology                            | 0.28            |
| MP:0001399                                    | hyperactivity                                                         | 0.28            |
| KEGG_ADHERENS_JUNCTION                        | KEGG_ADHERENS_JUNCTION                                                | 0.28            |
| MP:0004259                                    | small placenta                                                        | 0.28            |
| GO:0022618                                    | ribonucleoprotein complex assembly                                    | 0.28            |
| MP:0002578                                    | impaired ability to fire action potentials                            | 0.28            |

| Original gene set ID                                             | Original gene set description                                                      | Nominal P value |
|------------------------------------------------------------------|------------------------------------------------------------------------------------|-----------------|
| REACTOME_POST:TRANSLATIONAL_MODIFICATION_SYNTHESIS_OF_GPI:ANCHOR | REACTOME_POST:TRANSLATIONAL_MODIFICATION_SYNTHESIS_OF_GPI:ANCHOR                   | 0.28            |
| MP:0000267                                                       | abnormal heart development                                                         | 0.28            |
| ENSG000000205659                                                 | LINS2 PPI subnetwork                                                               | 0.28            |
| ENSG000000136352                                                 | NKX2-1 PPI subnetwork                                                              | 0.28            |
| ENSG000000108848                                                 | LUC7L3 PPI subnetwork                                                              | 0.28            |
| ENSG000000079335                                                 | CDC14A PPI subnetwork                                                              | 0.28            |
| MP:0003628                                                       | abnormal leukocyte adhesion                                                        | 0.28            |
| GO:0061008                                                       | hepaticobiliary system development                                                 | 0.28            |
| GO:0090287                                                       | regulation of cellular response to growth factor stimulus                          | 0.28            |
| MP:0006042                                                       | increased apoptosis                                                                | 0.28            |
| MP:0002144                                                       | abnormal B cell differentiation                                                    | 0.28            |
| ENSG000000107863                                                 | ARHGAP21 PPI subnetwork                                                            | 0.28            |
| ENSG000000196924                                                 | FLNA PPI subnetwork                                                                | 0.28            |
| ENSG000000160999                                                 | SH2B2 PPI subnetwork                                                               | 0.28            |
| GO:0051091                                                       | positive regulation of sequence-specific DNA binding transcription factor activity | 0.28            |
| ENSG000000132424                                                 | PNISR PPI subnetwork                                                               | 0.28            |
| GO:0017171                                                       | serine hydrolase activity                                                          | 0.28            |
| ENSG000000029534                                                 | ANK1 PPI subnetwork                                                                | 0.28            |
| REACTOME_SEMA4D_IN_SEMAPHORIN_SIGNALING                          | REACTOME_SEMA4D_IN_SEMAPHORIN_SIGNALING                                            | 0.28            |
| ENSG000000160633                                                 | SAFB PPI subnetwork                                                                | 0.28            |
| GO:0050870                                                       | positive regulation of T cell activation                                           | 0.28            |
| ENSG000000196498                                                 | NCOR2 PPI subnetwork                                                               | 0.28            |
| ENSG000000113460                                                 | BRX1 PPI subnetwork                                                                | 0.28            |
| GO:0002703                                                       | regulation of leukocyte mediated immunity                                          | 0.28            |
| ENSG000000198625                                                 | MDM4 PPI subnetwork                                                                | 0.28            |
| ENSG000000178585                                                 | CTNNBIP1 PPI subnetwork                                                            | 0.28            |
| GO:0004435                                                       | phosphatidylinositol phospholipase C activity                                      | 0.28            |
| KEGG_MAPK_SIGNALING_PATHWAY                                      | KEGG_MAPK_SIGNALING_PATHWAY                                                        | 0.28            |
| GO:0002685                                                       | regulation of leukocyte migration                                                  | 0.28            |
| GO:0052548                                                       | regulation of endopeptidase activity                                               | 0.28            |
| MP:0004200                                                       | decreased fetal size                                                               | 0.28            |
| GO:0045923                                                       | positive regulation of fatty acid metabolic process                                | 0.28            |
| MP:0004830                                                       | short incisors                                                                     | 0.28            |
| MP:0002566                                                       | abnormal sexual interaction                                                        | 0.28            |
| GO:0015114                                                       | phosphate ion transmembrane transporter activity                                   | 0.28            |
| GO:0050777                                                       | negative regulation of immune response                                             | 0.28            |
| GO:0031589                                                       | cell-substrate adhesion                                                            | 0.28            |
| ENSG000000187778                                                 | MCRS1 PPI subnetwork                                                               | 0.28            |
| ENSG000000065154                                                 | OAT PPI subnetwork                                                                 | 0.28            |
| ENSG000000182255                                                 | KCNA4 PPI subnetwork                                                               | 0.28            |
| GO:0005801                                                       | cis-Golgi network                                                                  | 0.28            |
| ENSG000000109606                                                 | DHX15 PPI subnetwork                                                               | 0.28            |
| MP:0004773                                                       | abnormal bile composition                                                          | 0.28            |
| MP:0002417                                                       | abnormal megakaryocyte morphology                                                  | 0.28            |
| GO:0007129                                                       | synapsis                                                                           | 0.28            |
| GO:0006544                                                       | glycine metabolic process                                                          | 0.28            |
| GO:0000785                                                       | chromatin                                                                          | 0.28            |
| ENSG000000145907                                                 | G3BP1 PPI subnetwork                                                               | 0.28            |
| REACTOME_NEGATIVE_REGULATORS_OF_RIG:IMDA5_SIGNALING              | REACTOME_NEGATIVE_REGULATORS_OF_RIG:IMDA5_SIGNALING                                | 0.28            |

**Original gene set ID****Original gene set description****Nominal P value**

|                                                             |                                                                             |      |
|-------------------------------------------------------------|-----------------------------------------------------------------------------|------|
| MP:0002411                                                  | decreased susceptibility to bacterial infection                             | 0.28 |
| ENSG00000145414                                             | NAF1 PPI subnetwork                                                         | 0.28 |
| GO:0014902                                                  | myotube differentiation                                                     | 0.28 |
| ENSG00000115207                                             | GTF3C2 PPI subnetwork                                                       | 0.28 |
| ENSG00000138768                                             | USO1 PPI subnetwork                                                         | 0.28 |
| ENSG00000162434                                             | JAK1 PPI subnetwork                                                         | 0.28 |
| MP:0001672                                                  | abnormal embryogenesis/ development                                         | 0.28 |
| ENSG00000113525                                             | IL5 PPI subnetwork                                                          | 0.28 |
| GO:0048010                                                  | vascular endothelial growth factor receptor signaling pathway               | 0.28 |
| ENSG00000125810                                             | CD93 PPI subnetwork                                                         | 0.28 |
| GO:0017038                                                  | protein import                                                              | 0.28 |
| GO:0006638                                                  | neutral lipid metabolic process                                             | 0.28 |
| ENSG00000101365                                             | IDH3B PPI subnetwork                                                        | 0.29 |
| MP:0005441                                                  | increased urine calcium level                                               | 0.29 |
| ENSG00000164985                                             | PSIP1 PPI subnetwork                                                        | 0.29 |
| MP:0005423                                                  | abnormal somatic nervous system physiology                                  | 0.29 |
| MP:0009435                                                  | abnormal miniature inhibitory postsynaptic currents                         | 0.29 |
| ENSG00000173545                                             | ZNF622 PPI subnetwork                                                       | 0.29 |
| ENSG00000139921                                             | TMX1 PPI subnetwork                                                         | 0.29 |
| GO:0042113                                                  | B cell activation                                                           | 0.29 |
| GO:0010675                                                  | regulation of cellular carbohydrate metabolic process                       | 0.29 |
| ENSG00000064547                                             | LPAR2 PPI subnetwork                                                        | 0.29 |
| GO:0018393                                                  | internal peptidyl-lysine acetylation                                        | 0.29 |
| GO:0033202                                                  | DNA helicase complex                                                        | 0.29 |
| GO:0031011                                                  | Ino80 complex                                                               | 0.29 |
| ENSG00000167004                                             | PDIA3 PPI subnetwork                                                        | 0.29 |
| GO:0005097                                                  | Rab GTPase activator activity                                               | 0.29 |
| REACTOME_TRANSPORT_TO_THE_GOLGI_AND_SUBSEQUENT_MODIFICATION | REACTOME_TRANSPORT_TO_THE_GOLGI_AND_SUBSEQUENT_MODIFICATION                 | 0.29 |
| MP:0004803                                                  | increased susceptibility to autoimmune diabetes                             | 0.29 |
| ENSG00000170365                                             | SMAD1 PPI subnetwork                                                        | 0.29 |
| GO:0008239                                                  | dipeptidyl-peptidase activity                                               | 0.29 |
| GO:0043574                                                  | peroxisomal transport                                                       | 0.29 |
| GO:0042035                                                  | regulation of cytokine biosynthetic process                                 | 0.29 |
| GO:0044144                                                  | modulation of growth of symbiont involved in interaction with host          | 0.29 |
| GO:0044126                                                  | regulation of growth of symbiont in host                                    | 0.29 |
| GO:0044116                                                  | growth of symbiont involved in interaction with host                        | 0.29 |
| GO:0044117                                                  | growth of symbiont in host                                                  | 0.29 |
| GO:0044146                                                  | negative regulation of growth of symbiont involved in interaction with host | 0.29 |
| GO:0044130                                                  | negative regulation of growth of symbiont in host                           | 0.29 |
| GO:0044110                                                  | growth involved in symbiotic interaction                                    | 0.29 |
| ENSG00000163399                                             | ATP1A1 PPI subnetwork                                                       | 0.29 |
| ENSG00000186868                                             | MAPT PPI subnetwork                                                         | 0.29 |
| ENSG00000198001                                             | IRAK4 PPI subnetwork                                                        | 0.29 |
| GO:0070374                                                  | positive regulation of ERK1 and ERK2 cascade                                | 0.29 |
| KEGG_TYPE_II_DIABETES_MELLITUS                              | KEGG_TYPE_II_DIABETES_MELLITUS                                              | 0.29 |
| MP:0008554                                                  | decreased circulating tumor necrosis factor level                           | 0.29 |
| GO:0005881                                                  | cytoplasmic microtubule                                                     | 0.29 |
| GO:0006954                                                  | inflammatory response                                                       | 0.29 |
| ENSG00000125740                                             | FOSB PPI subnetwork                                                         | 0.29 |

| Original gene set ID                                              | Original gene set description                                                    | Nominal P value |
|-------------------------------------------------------------------|----------------------------------------------------------------------------------|-----------------|
| GO:0033280                                                        | response to vitamin D                                                            | 0.29            |
| REACTOME_RAP1_SIGNALLING                                          | REACTOME_RAP1_SIGNALLING                                                         | 0.29            |
| GO:0005246                                                        | calcium channel regulator activity                                               | 0.29            |
| MP:0004423                                                        | abnormal squamosal bone morphology                                               | 0.29            |
| GO:0006399                                                        | tRNA metabolic process                                                           | 0.29            |
| GO:0019216                                                        | regulation of lipid metabolic process                                            | 0.29            |
| REACTOME_NUCLEOTIDE:BINDING_DOMAIN_LEUCINE_RICH_REPEAT_CONTAINING | REACTOME_NUCLEOTIDE:BINDING_DOMAIN_LEUCINE_RICH_REPEAT_CONTAINING                | 0.29            |
| ENSG00000131023                                                   | LATS1 PPI subnetwork                                                             | 0.29            |
| REACTOME_EFFECTS_OF_PIP2_HYDROLYSIS                               | REACTOME_EFFECTS_OF_PIP2_HYDROLYSIS                                              | 0.29            |
| ENSG00000148606                                                   | POLR3A PPI subnetwork                                                            | 0.29            |
| MP:0001314                                                        | corneal opacity                                                                  | 0.29            |
| GO:0035914                                                        | skeletal muscle cell differentiation                                             | 0.29            |
| ENSG00000124383                                                   | MPHOSPH10 PPI subnetwork                                                         | 0.29            |
| GO:0045907                                                        | positive regulation of vasoconstriction                                          | 0.29            |
| REACTOME_TRIGLYCERIDE_BIOSYNTHESIS                                | REACTOME_TRIGLYCERIDE_BIOSYNTHESIS                                               | 0.29            |
| ENSG00000107882                                                   | SUFU PPI subnetwork                                                              | 0.29            |
| ENSG00000136982                                                   | DSCC1 PPI subnetwork                                                             | 0.29            |
| GO:0043966                                                        | histone H3 acetylation                                                           | 0.29            |
| ENSG00000082397                                                   | EPB41L3 PPI subnetwork                                                           | 0.29            |
| MP:0005013                                                        | increased lymphocyte cell number                                                 | 0.29            |
| GO:0051272                                                        | positive regulation of cellular component movement                               | 0.29            |
| GO:0015238                                                        | drug transmembrane transporter activity                                          | 0.29            |
| ENSG00000206412                                                   | GNL1 PPI subnetwork                                                              | 0.29            |
| ENSG00000204590                                                   | GNL1 PPI subnetwork                                                              | 0.29            |
| ENSG00000206492                                                   | GNL1 PPI subnetwork                                                              | 0.29            |
| REACTOME_VITAMIN_B5_PANTOTHENATE_METABOLISM                       | REACTOME_VITAMIN_B5_PANTOTHENATE_METABOLISM                                      | 0.29            |
| ENSG00000184922                                                   | FMNL1 PPI subnetwork                                                             | 0.29            |
| GO:0005070                                                        | SH3/SH2 adaptor activity                                                         | 0.29            |
| ENSG00000164930                                                   | FZD6 PPI subnetwork                                                              | 0.29            |
| ENSG00000111432                                                   | FZD10 PPI subnetwork                                                             | 0.29            |
| ENSG00000057593                                                   | F7 PPI subnetwork                                                                | 0.29            |
| ENSG00000155966                                                   | AFF2 PPI subnetwork                                                              | 0.29            |
| GO:0016820                                                        | hydrolase activity, acting on acid anhydrides, catalyzing transmembrane movement | 0.29            |
| GO:0006400                                                        | tRNA modification                                                                | 0.29            |
| GO:0001755                                                        | neural crest cell migration                                                      | 0.29            |
| ENSG00000113263                                                   | ITK PPI subnetwork                                                               | 0.29            |
| GO:0009746                                                        | response to hexose stimulus                                                      | 0.29            |
| GO:0000977                                                        | RNA polymerase II regulatory region sequence-specific DNA binding                | 0.29            |
| GO:0000932                                                        | cytoplasmic mRNA processing body                                                 | 0.29            |
| ENSG00000120705                                                   | ETF1 PPI subnetwork                                                              | 0.29            |
| ENSG00000188536                                                   | HBA2 PPI subnetwork                                                              | 0.29            |
| ENSG00000206172                                                   | HBA1 PPI subnetwork                                                              | 0.29            |
| MP:0001806                                                        | decreased IgM level                                                              | 0.29            |
| MP:0001501                                                        | abnormal sleep pattern                                                           | 0.29            |
| GO:0045087                                                        | innate immune response                                                           | 0.29            |
| MP:0001325                                                        | abnormal retina morphology                                                       | 0.29            |
| ENSG00000145425                                                   | RPS3A PPI subnetwork                                                             | 0.29            |
| ENSG00000138018                                                   | EPT1 PPI subnetwork                                                              | 0.29            |
| ENSG00000166794                                                   | PPIB PPI subnetwork                                                              | 0.29            |

| Original gene set ID | Original gene set description                                                    | Nominal P value |
|----------------------|----------------------------------------------------------------------------------|-----------------|
| ENSG00000134248      | HBXIP PPI subnetwork                                                             | 0.29            |
| ENSG00000130985      | UBA1 PPI subnetwork                                                              | 0.29            |
| ENSG00000117480      | FAAH PPI subnetwork                                                              | 0.29            |
| MP:0002657           | chondrodystrophy                                                                 | 0.29            |
| GO:0016791           | phosphatase activity                                                             | 0.29            |
| ENSG00000112964      | GHR PPI subnetwork                                                               | 0.29            |
| ENSG00000107937      | GTPBP4 PPI subnetwork                                                            | 0.29            |
| MP:0000808           | abnormal hippocampus development                                                 | 0.29            |
| MP:0011087           | complete neonatal lethality                                                      | 0.29            |
| MP:0009657           | failure of chorioallantoic fusion                                                | 0.29            |
| GO:0032102           | negative regulation of response to external stimulus                             | 0.29            |
| GO:0048872           | homeostasis of number of cells                                                   | 0.29            |
| GO:0001818           | negative regulation of cytokine production                                       | 0.29            |
| GO:0016568           | chromatin modification                                                           | 0.29            |
| GO:0006906           | vesicle fusion                                                                   | 0.29            |
| GO:0042641           | actomyosin                                                                       | 0.29            |
| ENSG00000111641      | NOP2 PPI subnetwork                                                              | 0.29            |
| ENSG00000130810      | PPAN PPI subnetwork                                                              | 0.29            |
| GO:0051648           | vesicle localization                                                             | 0.29            |
| ENSG00000149269      | PAK1 PPI subnetwork                                                              | 0.29            |
| ENSG00000088205      | DDX18 PPI subnetwork                                                             | 0.29            |
| MP:0000875           | abnormal cerebellar Purkinje cell layer                                          | 0.29            |
| MP:0005597           | decreased susceptibility to type I hypersensitivity reactor                      | 0.29            |
| GO:0000979           | RNA polymerase II core promoter sequence-specific DNA binding                    | 0.29            |
| ENSG00000141141      | DDX52 PPI subnetwork                                                             | 0.29            |
| REACTOME_TRANSLATION | REACTOME_TRANSLATION                                                             | 0.29            |
| GO:0043281           | regulation of cysteine-type endopeptidase activity involved in apoptotic proces: | 0.29            |
| GO:2000241           | regulation of reproductive process                                               | 0.29            |
| ENSG00000005022      | SLC25A5 PPI subnetwork                                                           | 0.29            |
| ENSG00000132153      | DHX30 PPI subnetwork                                                             | 0.29            |
| ENSG00000064393      | HIPK2 PPI subnetwork                                                             | 0.29            |
| GO:0043903           | regulation of symbiosis, encompassing mutualism through parasitism               | 0.29            |
| GO:0050892           | intestinal absorption                                                            | 0.29            |
| GO:0006555           | methionine metabolic process                                                     | 0.29            |
| GO:0051656           | establishment of organelle localization                                          | 0.29            |
| MP:0002652           | thin myocardium                                                                  | 0.29            |
| GO:0010718           | positive regulation of epithelial to mesenchymal transitior                      | 0.29            |
| ENSG00000188404      | SELL PPI subnetwork                                                              | 0.29            |
| MP:0000872           | abnormal cerebellum external granule cell layer morphology                       | 0.29            |
| ENSG00000074054      | CLASP1 PPI subnetwork                                                            | 0.29            |
| GO:0017187           | peptidyl-glutamic acid carboxylation                                             | 0.29            |
| GO:0018214           | protein carboxylation                                                            | 0.29            |
| ENSG00000118523      | CTGF PPI subnetwork                                                              | 0.3             |
| MP:0002207           | abnormal long term potentiation                                                  | 0.3             |
| GO:0005795           | Golgi stack                                                                      | 0.3             |
| ENSG00000068793      | CYFIP1 PPI subnetwork                                                            | 0.3             |
| ENSG00000102158      | MAGT1 PPI subnetwork                                                             | 0.3             |
| GO:0030133           | transport vesicle                                                                | 0.3             |
| ENSG00000116544      | DLGAP3 PPI subnetwork                                                            | 0.3             |



| Original gene set ID                                          | Original gene set description                                  | Nominal P value |
|---------------------------------------------------------------|----------------------------------------------------------------|-----------------|
| ENSG00000157873                                               | TNFRSF14 PPI subnetwork                                        | 0.3             |
| ENSG00000139219                                               | COL2A1 PPI subnetwork                                          | 0.3             |
| ENSG00000104290                                               | FZD3 PPI subnetwork                                            | 0.3             |
| GO:0018394                                                    | peptidyl-lysine acetylation                                    | 0.3             |
| GO:0015293                                                    | symporter activity                                             | 0.3             |
| ENSG00000125538                                               | IL1B PPI subnetwork                                            | 0.3             |
| ENSG00000070785                                               | EIF2B3 PPI subnetwork                                          | 0.3             |
| GO:0007052                                                    | mitotic spindle organization                                   | 0.3             |
| GO:0060090                                                    | binding, bridging                                              | 0.3             |
| ENSG00000100811                                               | YY1 PPI subnetwork                                             | 0.3             |
| GO:0005669                                                    | transcription factor TFIIID complex                            | 0.3             |
| ENSG00000078269                                               | SYNJ2 PPI subnetwork                                           | 0.3             |
| ENSG00000131323                                               | TRAF3 PPI subnetwork                                           | 0.3             |
| ENSG00000009830                                               | POMT2 PPI subnetwork                                           | 0.3             |
| REACTOME_TRAF6_MEDIATED_INDUCTION_OF_PROINFLAMMATORY_CYTOKINE | REACTOME_TRAF6_MEDIATED_INDUCTION_OF_PROINFLAMMATORY_CYTOKINES | 0.3             |
| ENSG00000156453                                               | PCDH1 PPI subnetwork                                           | 0.3             |
| ENSG00000134697                                               | GNL2 PPI subnetwork                                            | 0.3             |
| MP:0003724                                                    | increased susceptibility to induced arthritis                  | 0.3             |
| MP:0005023                                                    | abnormal wound healing                                         | 0.3             |
| GO:0015298                                                    | solute:cation antiporter activity                              | 0.3             |
| MP:0003974                                                    | abnormal endocardium morphology                                | 0.3             |
| ENSG00000196415                                               | PRTN3 PPI subnetwork                                           | 0.3             |
| GO:0007281                                                    | germ cell development                                          | 0.3             |
| MP:0011024                                                    | abnormal branching involved in lung morphogenesis              | 0.3             |
| MP:0008451                                                    | retinal rod cell degeneration                                  | 0.3             |
| GO:0009119                                                    | ribonucleoside metabolic process                               | 0.3             |
| ENSG00000130164                                               | LDLR PPI subnetwork                                            | 0.3             |
| GO:0071216                                                    | cellular response to biotic stimulus                           | 0.3             |
| MP:0008049                                                    | increased memory T cell number                                 | 0.3             |
| ENSG00000127445                                               | PIN1 PPI subnetwork                                            | 0.3             |
| MP:0000125                                                    | absent incisors                                                | 0.3             |
| ENSG00000171858                                               | RPS21 PPI subnetwork                                           | 0.3             |
| ENSG00000113360                                               | DROSHA PPI subnetwork                                          | 0.3             |
| ENSG00000151498                                               | ACAD8 PPI subnetwork                                           | 0.3             |
| ENSG00000151090                                               | THRB PPI subnetwork                                            | 0.3             |
| ENSG00000172602                                               | RND1 PPI subnetwork                                            | 0.3             |
| ENSG00000170522                                               | ELOVL6 PPI subnetwork                                          | 0.3             |
| GO:0005978                                                    | glycogen biosynthetic process                                  | 0.3             |
| GO:0009250                                                    | glucan biosynthetic process                                    | 0.3             |
| MP:0001881                                                    | abnormal mammary gland physiology                              | 0.3             |
| MP:0000280                                                    | thin ventricular wall                                          | 0.3             |
| ENSG00000142676                                               | RPL11 PPI subnetwork                                           | 0.3             |
| GO:0031526                                                    | brush border membrane                                          | 0.3             |
| GO:0045785                                                    | positive regulation of cell adhesion                           | 0.3             |
| GO:0005929                                                    | cilium                                                         | 0.3             |
| GO:0005996                                                    | monosaccharide metabolic process                               | 0.3             |
| GO:0015491                                                    | cation:cation antiporter activity                              | 0.3             |
| ENSG00000141076                                               | CIRH1A PPI subnetwork                                          | 0.3             |
| ENSG00000169957                                               | ZNF768 PPI subnetwork                                          | 0.3             |

**Original gene set ID**

ENSG00000074201  
ENSG00000112242  
REACTOME\_MYD88\_CASCADE\_INITIATED\_ON\_PLASMA\_MEMBRANE  
REACTOME\_TOLL\_LIKE\_RECEPTOR\_10\_TLR10\_CASCADE  
REACTOME\_TOLL\_LIKE\_RECEPTOR\_5\_TLR5\_CASCADE  
GO:0004143  
GO:0050852  
GO:0051270  
ENSG00000166908  
MP:0002460  
GO:0007507  
GO:0007265  
ENSG00000187391  
ENSG00000178913  
REACTOME\_TRNA\_AMINOACYLATION  
MP:0005292  
REACTOME\_TOLL\_LIKE\_RECEPTOR\_4\_TLR4\_CASCADE  
GO:0045773  
GO:0045637  
ENSG00000132507  
GO:0004521  
MP:0008040  
MP:0002463  
GO:0032432  
ENSG00000136936  
REACTOME\_TOLL\_RECEPTOR\_CASCADES  
ENSG00000182718  
KEGG\_GLYCOSAMINOGLYCAN\_BIOSYNTHESIS\_HEPARAN\_SULFATE  
GO:0008320  
GO:0022884  
ENSG00000152147  
GO:0055024  
GO:0008637  
ENSG00000108296  
GO:0070227  
GO:0002675  
GO:0001104  
ENSG00000196781  
ENSG00000177105  
GO:0006109  
ENSG00000120071  
ENSG00000106804  
GO:0008373  
ENSG00000187109  
GO:0090329  
ENSG00000198742  
GO:0045646  
GO:0032655  
ENSG00000204319

**Original gene set description**

CLNS1A PPI subnetwork 0.3  
E2F3 PPI subnetwork 0.3  
REACTOME\_MYD88\_CASCADE\_INITIATED\_ON\_PLASMA\_MEMBRANE 0.3  
REACTOME\_TOLL\_LIKE\_RECEPTOR\_10\_TLR10\_CASCADE 0.3  
REACTOME\_TOLL\_LIKE\_RECEPTOR\_5\_TLR5\_CASCADE 0.3  
diacylglycerol kinase activity 0.3  
T cell receptor signaling pathway 0.3  
regulation of cellular component movement 0.3  
PIP4K2C PPI subnetwork 0.3  
decreased immunoglobulin level 0.3  
heart development 0.3  
Ras protein signal transduction 0.3  
MAGI2 PPI subnetwork 0.3  
TAF7 PPI subnetwork 0.3  
REACTOME\_TRNA\_AMINOACYLATION 0.3  
improved glucose tolerance 0.3  
REACTOME\_TOLL\_LIKE\_RECEPTOR\_4\_TLR4\_CASCADE 0.3  
positive regulation of axon extension 0.3  
regulation of myeloid cell differentiation 0.3  
EIF5A PPI subnetwork 0.3  
endoribonuclease activity 0.3  
decreased NK T cell number 0.3  
abnormal neutrophil physiology 0.3  
actin filament bundle 0.3  
XPA PPI subnetwork 0.3  
REACTOME\_TOLL\_RECEPTOR\_CASCADES 0.3  
ANXA2 PPI subnetwork 0.3  
KEGG\_GLYCOSAMINOGLYCAN\_BIOSYNTHESIS\_HEPARAN\_SULFATE 0.3  
protein transmembrane transporter activity 0.3  
macromolecule transmembrane transporter activity 0.3  
GEMIN6 PPI subnetwork 0.3  
regulation of cardiac muscle tissue development 0.3  
apoptotic mitochondrial changes 0.3  
CWC25 PPI subnetwork 0.3  
lymphocyte apoptotic process 0.3  
positive regulation of acute inflammatory response 0.3  
RNA polymerase II transcription cofactor activity 0.3  
TLE1 PPI subnetwork 0.3  
RHOG PPI subnetwork 0.3  
regulation of carbohydrate metabolic process 0.3  
KIAA1267 PPI subnetwork 0.3  
C5 PPI subnetwork 0.3  
sialyltransferase activity 0.3  
NAP1L1 PPI subnetwork 0.3  
regulation of DNA-dependent DNA replication 0.3  
SMURF1 PPI subnetwork 0.3  
regulation of erythrocyte differentiatior 0.3  
regulation of interleukin-12 production 0.3  
ENSG00000204319 PPI subnetwork 0.3

**Nominal P value**

| Original gene set ID                                           | Original gene set description                                                 | Nominal P value |
|----------------------------------------------------------------|-------------------------------------------------------------------------------|-----------------|
| MP:0002945                                                     | abnormal inhibitory postsynaptic currents                                     | 0.3             |
| ENSG00000161939                                                | C17orf49 PPI subnetwork                                                       | 0.3             |
| MP:0009403                                                     | increased variability of skeletal muscle fiber size                           | 0.3             |
| GO:0005372                                                     | water transmembrane transporter activity                                      | 0.3             |
| GO:0031099                                                     | regeneration                                                                  | 0.3             |
| ENSG00000196405                                                | EVL PPI subnetwork                                                            | 0.3             |
| ENSG00000105216                                                | ENSG00000105216 PPI subnetwork                                                | 0.3             |
| GO:0072332                                                     | signal transduction by p53 class mediator resulting in induction of apoptosis | 0.3             |
| ENSG00000086205                                                | FOLH1 PPI subnetwork                                                          | 0.3             |
| REACTOME_SHC:MEDIATED_CASCADE                                  | REACTOME_SHC:MEDIATED_CASCADE                                                 | 0.31            |
| GO:0033267                                                     | axon part                                                                     | 0.31            |
| GO:0000123                                                     | histone acetyltransferase complex                                             | 0.31            |
| GO:0031016                                                     | pancreas development                                                          | 0.31            |
| REACTOME_N:GLYCAN_ANTENNAE_ELONGATION_IN_THE_MEDIALTRANS:GOLGI | REACTOME_N:GLYCAN_ANTENNAE_ELONGATION_IN_THE_MEDIALTRANS:GOLGI                | 0.31            |
| ENSG00000148296                                                | SURF6 PPI subnetwork                                                          | 0.31            |
| GO:0051495                                                     | positive regulation of cytoskeleton organization                              | 0.31            |
| ENSG00000138448                                                | ITGAV PPI subnetwork                                                          | 0.31            |
| ENSG00000137497                                                | NUMA1 PPI subnetwork                                                          | 0.31            |
| GO:0004721                                                     | phosphoprotein phosphatase activity                                           | 0.31            |
| MP:0002743                                                     | glomerulonephritis                                                            | 0.31            |
| MP:0010024                                                     | increased total body fat amount                                               | 0.31            |
| ENSG00000135903                                                | PAX3 PPI subnetwork                                                           | 0.31            |
| MP:0002625                                                     | heart left ventricle hypertrophy                                              | 0.31            |
| MP:0003089                                                     | decreased skin tensile strength                                               | 0.31            |
| ENSG00000196591                                                | HDAC2 PPI subnetwork                                                          | 0.31            |
| GO:0043086                                                     | negative regulation of catalytic activity                                     | 0.31            |
| ENSG00000127564                                                | PKMYT1 PPI subnetwork                                                         | 0.31            |
| GO:0032313                                                     | regulation of Rab GTPase activity                                             | 0.31            |
| GO:0032483                                                     | regulation of Rab protein signal transduction                                 | 0.31            |
| GO:0016775                                                     | phosphotransferase activity, nitrogenous group as acceptor                    | 0.31            |
| ENSG00000138594                                                | TMOD3 PPI subnetwork                                                          | 0.31            |
| ENSG00000132170                                                | PPARG PPI subnetwork                                                          | 0.31            |
| MP:0002092                                                     | abnormal eye morphology                                                       | 0.31            |
| GO:0045060                                                     | negative thymic T cell selection                                              | 0.31            |
| ENSG00000124641                                                | MED20 PPI subnetwork                                                          | 0.31            |
| GO:0043038                                                     | amino acid activation                                                         | 0.31            |
| GO:0043039                                                     | tRNA aminoacylation                                                           | 0.31            |
| ENSG00000137275                                                | RIPK1 PPI subnetwork                                                          | 0.31            |
| ENSG00000171681                                                | ATF7IP PPI subnetwork                                                         | 0.31            |
| ENSG00000136238                                                | RAC1 PPI subnetwork                                                           | 0.31            |
| GO:0017124                                                     | SH3 domain binding                                                            | 0.31            |
| GO:0003073                                                     | regulation of systemic arterial blood pressure                                | 0.31            |
| MP:0004157                                                     | interrupted aortic arch                                                       | 0.31            |
| ENSG00000181856                                                | SLC2A4 PPI subnetwork                                                         | 0.31            |
| ENSG00000162702                                                | ZNF281 PPI subnetwork                                                         | 0.31            |
| GO:0005732                                                     | small nucleolar ribonucleoprotein complex                                     | 0.31            |
| MP:0005215                                                     | abnormal pancreatic islet morphology                                          | 0.31            |
| ENSG00000063177                                                | RPL18 PPI subnetwork                                                          | 0.31            |
| ENSG00000011260                                                | UTP18 PPI subnetwork                                                          | 0.31            |

| <b>Original gene set ID</b>                                   | <b>Original gene set description</b>                            | <b>Nominal P value</b> |
|---------------------------------------------------------------|-----------------------------------------------------------------|------------------------|
| GO:0006606                                                    | protein import into nucleus                                     | 0.31                   |
| MP:0002145                                                    | abnormal T cell differentiation                                 | 0.31                   |
| GO:0051427                                                    | hormone receptor binding                                        | 0.31                   |
| ENSG00000173369                                               | C1QB PPI subnetwork                                             | 0.31                   |
| ENSG00000167193                                               | CRK PPI subnetwork                                              | 0.31                   |
| GO:0017148                                                    | negative regulation of translation                              | 0.31                   |
| GO:0030291                                                    | protein serine/threonine kinase inhibitor activity              | 0.31                   |
| ENSG00000141378                                               | PTRH2 PPI subnetwork                                            | 0.31                   |
| GO:0031056                                                    | regulation of histone modification                              | 0.31                   |
| REACTOME_CYCLIN_D_ASSOCIATED_EVENTS_IN_G1                     | REACTOME_CYCLIN_D_ASSOCIATED_EVENTS_IN_G1                       | 0.31                   |
| REACTOME_G1_PHASE                                             | REACTOME_G1_PHASE                                               | 0.31                   |
| GO:0043601                                                    | nuclear replisome                                               | 0.31                   |
| GO:0030894                                                    | replisome                                                       | 0.31                   |
| ENSG00000163605                                               | PPP4R2 PPI subnetwork                                           | 0.31                   |
| ENSG00000049323                                               | LTBP1 PPI subnetwork                                            | 0.31                   |
| GO:0008285                                                    | negative regulation of cell proliferation                       | 0.31                   |
| MP:0001146                                                    | abnormal testis morphology                                      | 0.31                   |
| ENSG00000147689                                               | FAM83A PPI subnetwork                                           | 0.31                   |
| ENSG00000004660                                               | CAMKK1 PPI subnetwork                                           | 0.31                   |
| REACTOME_BILE_SALT_AND_ORGANIC_ANION_SLC_TRANSPORTERS         | REACTOME_BILE_SALT_AND_ORGANIC_ANION_SLC_TRANSPORTERS           | 0.31                   |
| GO:0021872                                                    | forebrain generation of neurons                                 | 0.31                   |
| ENSG00000112851                                               | ERBB2IP PPI subnetwork                                          | 0.31                   |
| GO:0048520                                                    | positive regulation of behavior                                 | 0.31                   |
| REACTOME_TOLL_LIKE_RECEPTOR_2_TLR2_CASCADE                    | REACTOME_TOLL_LIKE_RECEPTOR_2_TLR2_CASCADE                      | 0.31                   |
| REACTOME_TOLL_LIKE_RECEPTOR_TLR6TLR2_CASCADE                  | REACTOME_TOLL_LIKE_RECEPTOR_TLR6TLR2_CASCADE                    | 0.31                   |
| REACTOME_MYD88MAL_CASCADE_INITIATED_ON_PLASMA_MEMBRANE        | REACTOME_MYD88MAL_CASCADE_INITIATED_ON_PLASMA_MEMBRANE          | 0.31                   |
| REACTOME_TOLL_LIKE_RECEPTOR_TLR1TLR2_CASCADE                  | REACTOME_TOLL_LIKE_RECEPTOR_TLR1TLR2_CASCADE                    | 0.31                   |
| GO:0030673                                                    | axolemma                                                        | 0.31                   |
| GO:0030097                                                    | hemopoiesis                                                     | 0.31                   |
| REACTOME_INTERLEUKIN:3_5_AND_GM:CSF_SIGNALING                 | REACTOME_INTERLEUKIN:3_5_AND_GM:CSF_SIGNALING                   | 0.31                   |
| GO:0006312                                                    | mitotic recombination                                           | 0.31                   |
| ENSG000000085117                                              | CD82 PPI subnetwork                                             | 0.31                   |
| GO:0048742                                                    | regulation of skeletal muscle fiber development                 | 0.31                   |
| GO:0043303                                                    | mast cell degranulation                                         | 0.31                   |
| ENSG00000173281                                               | PPP1R3B PPI subnetwork                                          | 0.31                   |
| REACTOME_SRP:DEPENDENT_COTRANSLATIONAL_PROTEIN_TARGETING_TO_M | REACTOME_SRP:DEPENDENT_COTRANSLATIONAL_PROTEIN_TARGETING_TO_MEM | 0.31                   |
| ENSG00000161956                                               | SEN3 PPI subnetwork                                             | 0.31                   |
| ENSG00000102753                                               | KPNA3 PPI subnetwork                                            | 0.31                   |
| GO:0048641                                                    | regulation of skeletal muscle tissue development                | 0.31                   |
| GO:0005882                                                    | intermediate filament                                           | 0.31                   |
| ENSG00000164442                                               | CITED2 PPI subnetwork                                           | 0.31                   |
| MP:0000239                                                    | absent common myeloid progenitor cells                          | 0.31                   |
| ENSG00000212802                                               | ENSG00000212802 PPI subnetwork                                  | 0.31                   |
| ENSG00000174766                                               | ENSG00000174766 PPI subnetwork                                  | 0.31                   |
| MP:0002114                                                    | abnormal axial skeleton morphology                              | 0.31                   |
| ENSG00000198933                                               | TBKBP1 PPI subnetwork                                           | 0.31                   |
| ENSG00000129255                                               | MPDU1 PPI subnetwork                                            | 0.31                   |
| GO:0006720                                                    | isoprenoid metabolic process                                    | 0.31                   |
| ENSG00000204271                                               | SPIN3 PPI subnetwork                                            | 0.31                   |



| <b>Original gene set ID</b>                       | <b>Original gene set description</b>                             | <b>Nominal P value</b> |
|---------------------------------------------------|------------------------------------------------------------------|------------------------|
| ENSG00000172594                                   | SMPDL3A PPI subnetwork                                           | 0.32                   |
| MP:0001556                                        | increased circulating HDL cholesterol leve                       | 0.32                   |
| ENSG00000099882                                   | ENSG00000099882 PPI subnetwork                                   | 0.32                   |
| ENSG00000179632                                   | MAF1 PPI subnetwork                                              | 0.32                   |
| GO:0005275                                        | amine transmembrane transporter activity                         | 0.32                   |
| GO:0051249                                        | regulation of lymphocyte activation                              | 0.32                   |
| MP:0004613                                        | fusion of vertebral arches                                       | 0.32                   |
| GO:0006470                                        | protein dephosphorylation                                        | 0.32                   |
| GO:0009071                                        | serine family amino acid catabolic process                       | 0.32                   |
| ENSG00000157240                                   | FZD1 PPI subnetwork                                              | 0.32                   |
| GO:0090177                                        | establishment of planar polarity involved in neural tube closure | 0.32                   |
| ENSG00000114784                                   | EIF1B PPI subnetwork                                             | 0.32                   |
| GO:0070372                                        | regulation of ERK1 and ERK2 cascade                              | 0.32                   |
| ENSG00000124151                                   | NCOA3 PPI subnetwork                                             | 0.32                   |
| ENSG00000185883                                   | ATP6V0C PPI subnetwork                                           | 0.32                   |
| GO:0000794                                        | condensed nuclear chromosome                                     | 0.32                   |
| MP:0000471                                        | abnormal stomach epithelium morphology                           | 0.32                   |
| MP:0000418                                        | focal hair loss                                                  | 0.32                   |
| ENSG00000175220                                   | ARHGAP1 PPI subnetwork                                           | 0.32                   |
| GO:0010721                                        | negative regulation of cell development                          | 0.32                   |
| MP:0004401                                        | increased cochlear outer hair cell number                        | 0.32                   |
| GO:0030128                                        | clathrin coat of endocytic vesicle                               | 0.32                   |
| MP:0004946                                        | abnormal regulatory T cell physiology                            | 0.32                   |
| MP:0004768                                        | abnormal axonal transport                                        | 0.32                   |
| REACTOME_PROTEIN_FOLDING                          | REACTOME_PROTEIN_FOLDING                                         | 0.32                   |
| ENSG00000112208                                   | BAG2 PPI subnetwork                                              | 0.32                   |
| REACTOME_TCR_SIGNALING                            | REACTOME_TCR_SIGNALING                                           | 0.32                   |
| REACTOME_TRANSLATION_INITIATION_COMPLEX_FORMATION | REACTOME_TRANSLATION_INITIATION_COMPLEX_FORMATION                | 0.32                   |
| REACTOME_DEADENYLATION_OF_MRNA                    | REACTOME_DEADENYLATION_OF_MRNA                                   | 0.32                   |
| REACTOME_THE_NLRP3_INFLAMMASOME                   | REACTOME_THE_NLRP3_INFLAMMASOME                                  | 0.32                   |
| ENSG00000127824                                   | TUBA4A PPI subnetwork                                            | 0.32                   |
| GO:0001889                                        | liver development                                                | 0.32                   |
| REACTOME_TOLL LIKE RECEPTOR_9_TLR9_CASCADE        | REACTOME_TOLL LIKE RECEPTOR_9_TLR9_CASCADE                       | 0.32                   |
| ENSG00000159063                                   | ALG8 PPI subnetwork                                              | 0.32                   |
| MP:0011260                                        | abnormal head mesenchyme morphology                              | 0.32                   |
| GO:0045843                                        | negative regulation of striated muscle tissue development        | 0.32                   |
| GO:0006418                                        | tRNA aminoacylation for protein translation                      | 0.32                   |
| GO:0030835                                        | negative regulation of actin filament depolymerization           | 0.32                   |
| MP:0011085                                        | complete postnatal lethality                                     | 0.32                   |
| ENSG00000100029                                   | PES1 PPI subnetwork                                              | 0.32                   |
| ENSG00000149273                                   | RPS3 PPI subnetwork                                              | 0.32                   |
| GO:0050715                                        | positive regulation of cytokine secretior                        | 0.32                   |
| GO:0015629                                        | actin cytoskeleton                                               | 0.32                   |
| KEGG_CYTOSOLIC_DNA_SENSING_PATHWAY                | KEGG_CYTOSOLIC_DNA_SENSING_PATHWAY                               | 0.32                   |
| ENSG00000173530                                   | TNFRSF10D PPI subnetwork                                         | 0.32                   |
| ENSG00000106546                                   | AHR PPI subnetwork                                               | 0.32                   |
| ENSG00000152944                                   | MED21 PPI subnetwork                                             | 0.32                   |
| ENSG00000133398                                   | MED10 PPI subnetwork                                             | 0.32                   |
| GO:0007019                                        | microtubule depolymerization                                     | 0.32                   |

| Original gene set ID                                            | Original gene set description                                                          | Nominal P value |
|-----------------------------------------------------------------|----------------------------------------------------------------------------------------|-----------------|
| MP:0004173                                                      | abnormal intervertebral disk morphology                                                | 0.32            |
| ENSG00000125084                                                 | WNT1 PPI subnetwork                                                                    | 0.32            |
| GO:0003215                                                      | cardiac right ventricle morphogenesis                                                  | 0.32            |
| ENSG00000149968                                                 | MMP3 PPI subnetwork                                                                    | 0.32            |
| ENSG00000099389                                                 | ENSG00000099389 PPI subnetwork                                                         | 0.32            |
| ENSG00000118972                                                 | FGF23 PPI subnetwork                                                                   | 0.32            |
| ENSG00000162521                                                 | RBBP4 PPI subnetwork                                                                   | 0.32            |
| ENSG00000113916                                                 | BCL6 PPI subnetwork                                                                    | 0.32            |
| ENSG00000037280                                                 | FLT4 PPI subnetwork                                                                    | 0.32            |
| ENSG00000103653                                                 | CSK PPI subnetwork                                                                     | 0.32            |
| ENSG00000111364                                                 | DDX55 PPI subnetwork                                                                   | 0.32            |
| REACTOME_FRS2:MEDIATED_CASCADE                                  | REACTOME_FRS2:MEDIATED_CASCADE                                                         | 0.32            |
| GO:0031228                                                      | intrinsic to Golgi membrane                                                            | 0.32            |
| MP:0006379                                                      | abnormal spermatocyte morphology                                                       | 0.32            |
| ENSG00000184678                                                 | HIST2H2BE PPI subnetwork                                                               | 0.32            |
| GO:0051240                                                      | positive regulation of multicellular organismal process                                | 0.32            |
| GO:0050321                                                      | tau-protein kinase activity                                                            | 0.32            |
| GO:0051635                                                      | bacterial cell surface binding                                                         | 0.32            |
| MP:0000364                                                      | abnormal vascular regression                                                           | 0.32            |
| ENSG00000104980                                                 | TIMM44 PPI subnetwork                                                                  | 0.32            |
| GO:0042475                                                      | odontogenesis of dentin-containing tooth                                               | 0.32            |
| REACTOME_PD:1_SIGNALING                                         | REACTOME_PD:1_SIGNALING                                                                | 0.32            |
| GO:0006693                                                      | prostaglandin metabolic process                                                        | 0.32            |
| GO:0007259                                                      | JAK-STAT cascade                                                                       | 0.32            |
| ENSG00000215301                                                 | DDX3X PPI subnetwork                                                                   | 0.32            |
| GO:0016893                                                      | endonuclease activity, active with either ribo- or deoxyribonucleic acids and products | 0.32            |
| ENSG00000175390                                                 | EIF3F PPI subnetwork                                                                   | 0.32            |
| GO:0008235                                                      | metalloexopeptidase activity                                                           | 0.32            |
| GO:0002764                                                      | immune response-regulating signaling pathway                                           | 0.32            |
| MP:0002891                                                      | increased insulin sensitivity                                                          | 0.32            |
| GO:0051567                                                      | histone H3-K9 methylation                                                              | 0.32            |
| ENSG00000120158                                                 | RCL1 PPI subnetwork                                                                    | 0.32            |
| KEGG_OTHER_GLYCAN_DEGRADATION                                   | KEGG_OTHER_GLYCAN_DEGRADATION                                                          | 0.32            |
| GO:0051348                                                      | negative regulation of transferase activity                                            | 0.32            |
| ENSG00000159348                                                 | CYB5R1 PPI subnetwork                                                                  | 0.32            |
| GO:0002706                                                      | regulation of lymphocyte mediated immunity                                             | 0.32            |
| ENSG00000196981                                                 | WDR5B PPI subnetwork                                                                   | 0.32            |
| ENSG00000185736                                                 | ADARB2 PPI subnetwork                                                                  | 0.32            |
| MP:0010254                                                      | nuclear cataracts                                                                      | 0.32            |
| MP:0008078                                                      | increased CD8-positive T cell number                                                   | 0.32            |
| GO:0004629                                                      | phospholipase C activity                                                               | 0.32            |
| ENSG00000099194                                                 | SCD PPI subnetwork                                                                     | 0.32            |
| ENSG00000112578                                                 | BYSL PPI subnetwork                                                                    | 0.32            |
| ENSG00000164587                                                 | RPS14 PPI subnetwork                                                                   | 0.32            |
| ENSG00000136271                                                 | DDX56 PPI subnetwork                                                                   | 0.32            |
| REACTOME_ACTIVATION_OF_THE_MRNA_UPON_BINDING_OF_THE_CAP:BINDING | REACTOME_ACTIVATION_OF_THE_MRNA_UPON_BINDING_OF_THE_CAP:BINDING                        | 0.32            |
| GO:0046620                                                      | regulation of organ growth                                                             | 0.32            |
| GO:0070411                                                      | I-SMAD binding                                                                         | 0.32            |
| ENSG00000176165                                                 | FOXG1 PPI subnetwork                                                                   | 0.32            |





| Original gene set ID                                        | Original gene set description                                  | Nominal P value |
|-------------------------------------------------------------|----------------------------------------------------------------|-----------------|
| ENSG00000181061                                             | HIGD1A PPI subnetwork                                          | 0.33            |
| GO:0005201                                                  | extracellular matrix structural constituent                    | 0.33            |
| ENSG00000140564                                             | FURIN PPI subnetwork                                           | 0.33            |
| REACTOME_METABOLISM_OF_CARBOHYDRATES                        | REACTOME_METABOLISM_OF_CARBOHYDRATES                           | 0.33            |
| MP:0005669                                                  | increased circulating leptin level                             | 0.33            |
| MP:0006126                                                  | abnormal outflow tract development                             | 0.33            |
| GO:0048565                                                  | digestive tract development                                    | 0.33            |
| GO:0016577                                                  | histone demethylation                                          | 0.33            |
| MP:0008826                                                  | abnormal splenic cell ratio                                    | 0.33            |
| ENSG00000170345                                             | FOS PPI subnetwork                                             | 0.33            |
| ENSG00000127586                                             | CHTF18 PPI subnetwork                                          | 0.33            |
| GO:0002455                                                  | humoral immune response mediated by circulating immunoglobulin | 0.33            |
| ENSG00000057663                                             | ATG5 PPI subnetwork                                            | 0.33            |
| ENSG00000068024                                             | HDAC4 PPI subnetwork                                           | 0.33            |
| ENSG00000130772                                             | MED18 PPI subnetwork                                           | 0.33            |
| MP:0003932                                                  | abnormal molar crown morphology                                | 0.33            |
| GO:0051019                                                  | mitogen-activated protein kinase binding                       | 0.33            |
| ENSG00000163823                                             | CCR1 PPI subnetwork                                            | 0.33            |
| REACTOME_EXTRINSIC_PATHWAY_FOR_APOPTOSIS                    | REACTOME_EXTRINSIC_PATHWAY_FOR_APOPTOSIS                       | 0.33            |
| REACTOME_DEATH_RECEPTOR__SIGNALLING                         | REACTOME_DEATH_RECEPTOR__SIGNALLING                            | 0.33            |
| ENSG00000108773                                             | KAT2A PPI subnetwork                                           | 0.33            |
| GO:0048525                                                  | negative regulation of viral reproduction                      | 0.33            |
| GO:0045071                                                  | negative regulation of viral genome replication                | 0.33            |
| GO:0007126                                                  | meiosis                                                        | 0.33            |
| GO:0051327                                                  | M phase of meiotic cell cycle                                  | 0.33            |
| REACTOME_REMOVAL_OF_THE_FLAP_INTERMEDIATE                   | REACTOME_REMOVAL_OF_THE_FLAP_INTERMEDIATE                      | 0.33            |
| REACTOME_CLASS_C3_METABOTROPIC_Glutamatepheromone_receptors | REACTOME_CLASS_C3_METABOTROPIC_Glutamatepheromone_receptors    | 0.33            |
| ENSG00000118503                                             | TNFAIP3 PPI subnetwork                                         | 0.33            |
| GO:0035336                                                  | long-chain fatty-acyl-CoA metabolic process                    | 0.33            |
| GO:0035338                                                  | long-chain fatty-acyl-CoA biosynthetic process                 | 0.33            |
| ENSG00000186340                                             | THBS2 PPI subnetwork                                           | 0.33            |
| GO:0016638                                                  | oxidoreductase activity, acting on the CH-NH2 group of donors  | 0.33            |
| ENSG00000206211                                             | ENSG00000206211 PPI subnetwork                                 | 0.33            |
| ENSG00000204220                                             | PFDN6 PPI subnetwork                                           | 0.33            |
| ENSG00000206283                                             | PFDN6 PPI subnetwork                                           | 0.33            |
| ENSG00000171557                                             | FGG PPI subnetwork                                             | 0.33            |
| GO:0050792                                                  | regulation of viral reproduction                               | 0.33            |
| MP:0003743                                                  | abnormal facial morphology                                     | 0.33            |
| MP:0005253                                                  | abnormal eye physiology                                        | 0.33            |
| ENSG00000161980                                             | POLR3K PPI subnetwork                                          | 0.33            |
| GO:0008238                                                  | exopeptidase activity                                          | 0.33            |
| MP:0003982                                                  | increased cholesterol level                                    | 0.33            |
| MP:0000079                                                  | abnormal basioccipital bone morphology                         | 0.33            |
| GO:0005977                                                  | glycogen metabolic process                                     | 0.33            |
| MP:0010418                                                  | perimembraneous ventricular septal defect                      | 0.33            |
| GO:0019827                                                  | stem cell maintenance                                          | 0.33            |
| KEGG_CELL_ADHESION_MOLECULES_CAMS                           | KEGG_CELL_ADHESION_MOLECULES_CAMS                              | 0.33            |
| MP:0008284                                                  | abnormal hippocampus pyramidal cell layer                      | 0.33            |
| ENSG00000167674                                             | ENSG00000167674 PPI subnetwork                                 | 0.33            |

| Original gene set ID                | Original gene set description                  | Nominal P value |
|-------------------------------------|------------------------------------------------|-----------------|
| MP:0002831                          | absent Peyer's patches                         | 0.33            |
| ENSG00000178568                     | ERBB4 PPI subnetwork                           | 0.33            |
| GO:0000272                          | polysaccharide catabolic process               | 0.33            |
| GO:0034377                          | plasma lipoprotein particle assembly           | 0.33            |
| GO:0065005                          | protein-lipid complex assembly                 | 0.33            |
| MP:0005358                          | abnormal incisor morphology                    | 0.33            |
| GO:0043296                          | apical junction complex                        | 0.33            |
| MP:0008438                          | abnormal cutaneous collagen fibril morphology  | 0.33            |
| GO:0045597                          | positive regulation of cell differentiation    | 0.33            |
| GO:0019717                          | synaptosome                                    | 0.33            |
| ENSG00000102878                     | HSF4 PPI subnetwork                            | 0.33            |
| GO:0030427                          | site of polarized growth                       | 0.33            |
| KEGG_WNT_SIGNALING_PATHWAY          | KEGG_WNT_SIGNALING_PATHWAY                     | 0.33            |
| ENSG00000078328                     | RBFOX1 PPI subnetwork                          | 0.33            |
| ENSG00000198231                     | DDX42 PPI subnetwork                           | 0.33            |
| GO:0007586                          | digestion                                      | 0.33            |
| GO:0016558                          | protein import into peroxisome matrix          | 0.33            |
| GO:0043022                          | ribosome binding                               | 0.33            |
| ENSG00000003402                     | CFLAR PPI subnetwork                           | 0.33            |
| MP:0001825                          | arrested T cell differentiation                | 0.33            |
| ENSG00000174177                     | CTU2 PPI subnetwork                            | 0.33            |
| ENSG00000108592                     | FTSJ3 PPI subnetwork                           | 0.33            |
| GO:0071826                          | ribonucleoprotein complex subunit organization | 0.33            |
| GO:0002443                          | leukocyte mediated immunity                    | 0.33            |
| MP:0009395                          | increased nucleated erythrocyte cell number    | 0.33            |
| ENSG00000181852                     | RNF41 PPI subnetwork                           | 0.33            |
| GO:0030879                          | mammary gland development                      | 0.33            |
| MP:0004901                          | decreased male germ cell number                | 0.33            |
| ENSG00000170486                     | KRT72 PPI subnetwork                           | 0.34            |
| GO:0034504                          | protein localization to nucleus                | 0.34            |
| ENSG00000164758                     | MED30 PPI subnetwork                           | 0.34            |
| REACTOME_NUCLEAR_SIGNALING_BY_ERBB4 | REACTOME_NUCLEAR_SIGNALING_BY_ERBB4            | 0.34            |
| ENSG00000175634                     | RPS6KB2 PPI subnetwork                         | 0.34            |
| ENSG00000146143                     | ENSG00000146143 PPI subnetwork                 | 0.34            |
| MP:0004948                          | abnormal neuronal precursor proliferation      | 0.34            |
| MP:0008827                          | abnormal thymus cell ratio                     | 0.34            |
| MP:0002875                          | decreased erythrocyte cell number              | 0.34            |
| GO:0005840                          | ribosome                                       | 0.34            |
| MP:0009703                          | decreased birth body size                      | 0.34            |
| ENSG00000180138                     | CSNK1A1L PPI subnetwork                        | 0.34            |
| MP:0011083                          | complete lethality at weaning                  | 0.34            |
| ENSG00000139637                     | C12orf10 PPI subnetwork                        | 0.34            |
| GO:0071347                          | cellular response to interleukin-1             | 0.34            |
| GO:0018904                          | organic ether metabolic process                | 0.34            |
| ENSG00000143153                     | ATP1B1 PPI subnetwork                          | 0.34            |
| ENSG00000143622                     | RIT1 PPI subnetwork                            | 0.34            |
| ENSG00000188488                     | SERPINA5 PPI subnetwork                        | 0.34            |
| GO:0008146                          | sulfotransferase activity                      | 0.34            |
| GO:0016338                          | calcium-independent cell-cell adhesion         | 0.34            |

| Original gene set ID                                      | Original gene set description                                 | Nominal P value |
|-----------------------------------------------------------|---------------------------------------------------------------|-----------------|
| ENSG00000017260                                           | ATP2C1 PPI subnetwork                                         | 0.34            |
| GO:0008601                                                | protein phosphatase type 2A regulator activity                | 0.34            |
| ENSG000000149948                                          | HMG2 PPI subnetwork                                           | 0.34            |
| ENSG000000160220                                          | ENSG000000160220 PPI subnetwork                               | 0.34            |
| ENSG000000123384                                          | LRP1 PPI subnetwork                                           | 0.34            |
| MP:0008126                                                | increased dendritic cell number                               | 0.34            |
| GO:0008022                                                | protein C-terminus binding                                    | 0.34            |
| GO:0007127                                                | meiosis I                                                     | 0.34            |
| GO:0006897                                                | endocytosis                                                   | 0.34            |
| GO:0010324                                                | membrane invagination                                         | 0.34            |
| ENSG000000134250                                          | NOTCH2 PPI subnetwork                                         | 0.34            |
| ENSG000000150459                                          | SAP18 PPI subnetwork                                          | 0.34            |
| ENSG000000213588                                          | ZBTB9 PPI subnetwork                                          | 0.34            |
| GO:0006073                                                | cellular glucan metabolic process                             | 0.34            |
| GO:0044042                                                | glucan metabolic process                                      | 0.34            |
| ENSG000000147677                                          | EIF3H PPI subnetwork                                          | 0.34            |
| KEGG_ARRHYTHMOGENIC_RIGHT_VENTRICULAR_CARDIOMYOPATHY_ARVC | KEGG_ARRHYTHMOGENIC_RIGHT_VENTRICULAR_CARDIOMYOPATHY_ARVC     | 0.34            |
| ENSG000000138433                                          | CIR1 PPI subnetwork                                           | 0.34            |
| MP:0001726                                                | abnormal allantois morphology                                 | 0.34            |
| ENSG000000106263                                          | EIF3B PPI subnetwork                                          | 0.34            |
| MP:0010263                                                | total cataracts                                               | 0.34            |
| REACTOME_SEMAPHORIN_INTERACTIONS                          | REACTOME_SEMAPHORIN_INTERACTIONS                              | 0.34            |
| GO:0002819                                                | regulation of adaptive immune response                        | 0.34            |
| MP:0003993                                                | abnormal ventral spinal root morphology                       | 0.34            |
| MP:0002705                                                | dilated renal tubules                                         | 0.34            |
| ENSG000000197249                                          | SERPINA1 PPI subnetwork                                       | 0.34            |
| ENSG000000152268                                          | ENSG000000152268 PPI subnetwork                               | 0.34            |
| REACTOME_HDL:MEDIATED_LIPID_TRANSPORT                     | REACTOME_HDL:MEDIATED_LIPID_TRANSPORT                         | 0.34            |
| MP:0006027                                                | impaired lung alveolus development                            | 0.34            |
| MP:0010249                                                | lactation failure                                             | 0.34            |
| GO:0004623                                                | phospholipase A2 activity                                     | 0.34            |
| REACTOME_SIGNALING_BY_TGF_BETA                            | REACTOME_SIGNALING_BY_TGF_BETA                                | 0.34            |
| GO:0001736                                                | establishment of planar polarity                              | 0.34            |
| ENSG000000006638                                          | TBXA2R PPI subnetwork                                         | 0.34            |
| GO:0016875                                                | ligase activity, forming carbon-oxygen bonds                  | 0.34            |
| GO:0004812                                                | aminoacyl-tRNA ligase activity                                | 0.34            |
| GO:0016876                                                | ligase activity, forming aminoacyl-tRNA and related compounds | 0.34            |
| ENSG000000196374                                          | HIST1H2BM PPI subnetwork                                      | 0.34            |
| MP:0004359                                                | short ulna                                                    | 0.34            |
| MP:0000109                                                | abnormal parietal bone morphology                             | 0.34            |
| MP:0005103                                                | abnormal retinal pigmentation                                 | 0.34            |
| MP:0005289                                                | increased oxygen consumption                                  | 0.34            |
| REACTOME_UNWINDING_OF_DNA                                 | REACTOME_UNWINDING_OF_DNA                                     | 0.34            |
| GO:0030175                                                | filopodium                                                    | 0.34            |
| MP:0000639                                                | abnormal adrenal gland morphology                             | 0.34            |
| MP:0002499                                                | chronic inflammation                                          | 0.34            |
| GO:0048568                                                | embryonic organ development                                   | 0.34            |
| ENSG000000173674                                          | EIF1AX PPI subnetwork                                         | 0.34            |
| GO:0015020                                                | glucuronosyltransferase activity                              | 0.34            |

| Original gene set ID                       | Original gene set description                                                        | Nominal P value |
|--------------------------------------------|--------------------------------------------------------------------------------------|-----------------|
| ENSG00000108559                            | NUP88 PPI subnetwork                                                                 | 0.34            |
| GO:0006084                                 | acetyl-CoA metabolic process                                                         | 0.34            |
| GO:0050920                                 | regulation of chemotaxis                                                             | 0.34            |
| MP:0000333                                 | decreased bone marrow cell number                                                    | 0.34            |
| GO:0003725                                 | double-stranded RNA binding                                                          | 0.34            |
| MP:0010403                                 | atrial septal defect                                                                 | 0.34            |
| GO:0005921                                 | gap junction                                                                         | 0.34            |
| GO:0003013                                 | circulatory system process                                                           | 0.34            |
| ENSG00000102871                            | TRADD PPI subnetwork                                                                 | 0.34            |
| GO:0046134                                 | pyrimidine nucleoside biosynthetic process                                           | 0.34            |
| GO:0032103                                 | positive regulation of response to external stimulus                                 | 0.34            |
| GO:0045055                                 | regulated secretory pathway                                                          | 0.34            |
| GO:0043189                                 | H4/H2A histone acetyltransferase complex                                             | 0.34            |
| ENSG00000156697                            | UTP14A PPI subnetwork                                                                | 0.34            |
| GO:0045182                                 | translation regulator activity                                                       | 0.34            |
| ENSG00000080824                            | HSP90AA1 PPI subnetwork                                                              | 0.34            |
| GO:0002753                                 | cytoplasmic pattern recognition receptor signaling pathway                           | 0.34            |
| GO:0070423                                 | nucleotide-binding oligomerization domain containing signaling pathway               | 0.34            |
| GO:0035872                                 | nucleotide-binding domain, leucine rich repeat containing receptor signaling pathway | 0.34            |
| MP:0011093                                 | complete embryonic lethality at implantation                                         | 0.34            |
| GO:0015934                                 | large ribosomal subunit                                                              | 0.34            |
| ENSG00000134376                            | CRB1 PPI subnetwork                                                                  | 0.34            |
| ENSG00000131269                            | ABC7 PPI subnetwork                                                                  | 0.34            |
| ENSG00000155438                            | MKI67IP PPI subnetwork                                                               | 0.34            |
| MP:0000217                                 | abnormal leukocyte cell number                                                       | 0.34            |
| REACTOME_NOTCH:HLH_TRANSCRIPTION_PATHWAY   | REACTOME_NOTCH:HLH_TRANSCRIPTION_PATHWAY                                             | 0.34            |
| REACTOME_NICD_TRAFFICS_TO_NUCLEUS          | REACTOME_NICD_TRAFFICS_TO_NUCLEUS                                                    | 0.34            |
| ENSG00000198918                            | RPL39 PPI subnetwork                                                                 | 0.34            |
| MP:0000141                                 | abnormal vertebral body morphology                                                   | 0.34            |
| GO:0050768                                 | negative regulation of neurogenesis                                                  | 0.34            |
| GO:0046545                                 | development of primary female sexual characteristics                                 | 0.34            |
| GO:0007589                                 | body fluid secretion                                                                 | 0.34            |
| ENSG00000131462                            | TUBG1 PPI subnetwork                                                                 | 0.34            |
| ENSG00000026508                            | CD44 PPI subnetwork                                                                  | 0.34            |
| ENSG00000066926                            | FECH PPI subnetwork                                                                  | 0.34            |
| MP:0000063                                 | decreased bone mineral density                                                       | 0.34            |
| GO:0002684                                 | positive regulation of immune system process                                         | 0.34            |
| MP:0003052                                 | omphalocele                                                                          | 0.34            |
| GO:0009395                                 | phospholipid catabolic process                                                       | 0.34            |
| ENSG00000064300                            | NGFR PPI subnetwork                                                                  | 0.34            |
| ENSG00000185745                            | IFIT1 PPI subnetwork                                                                 | 0.34            |
| ENSG00000171314                            | PGAM1 PPI subnetwork                                                                 | 0.34            |
| GO:0045576                                 | mast cell activation                                                                 | 0.34            |
| GO:0015296                                 | anion:cation symporter activity                                                      | 0.34            |
| ENSG00000125485                            | DDX31 PPI subnetwork                                                                 | 0.34            |
| ENSG00000114978                            | MOB1A PPI subnetwork                                                                 | 0.34            |
| ENSG00000197063                            | MAFG PPI subnetwork                                                                  | 0.35            |
| ENSG00000076003                            | MCM6 PPI subnetwork                                                                  | 0.35            |
| REACTOME_GLYCOGEN_BREAKDOWN_GLYCOGENOLYSIS | REACTOME_GLYCOGEN_BREAKDOWN_GLYCOGENOLYSIS                                           | 0.35            |

| Original gene set ID                                        | Original gene set description                                      | Nominal P value |
|-------------------------------------------------------------|--------------------------------------------------------------------|-----------------|
| ENSG00000078579                                             | FGF20 PPI subnetwork                                               | 0.35            |
| MP:0004231                                                  | abnormal calcium ion homeostasis                                   | 0.35            |
| ENSG00000142252                                             | GEMIN7 PPI subnetwork                                              | 0.35            |
| ENSG00000111450                                             | STX2 PPI subnetwork                                                | 0.35            |
| GO:0042277                                                  | peptide binding                                                    | 0.35            |
| GO:0042623                                                  | ATPase activity, coupled                                           | 0.35            |
| GO:0016327                                                  | apicolateral plasma membrane                                       | 0.35            |
| ENSG00000008710                                             | PKD1 PPI subnetwork                                                | 0.35            |
| MP:0006055                                                  | abnormal vascular endothelial cell morphology                      | 0.35            |
| ENSG00000196504                                             | PRPF40A PPI subnetwork                                             | 0.35            |
| MP:0008450                                                  | retinal photoreceptor degeneration                                 | 0.35            |
| ENSG00000095015                                             | MAP3K1 PPI subnetwork                                              | 0.35            |
| MP:0000474                                                  | abnormal foregut morphology                                        | 0.35            |
| GO:0008135                                                  | translation factor activity, nucleic acid binding                  | 0.35            |
| ENSG00000130726                                             | TRIM28 PPI subnetwork                                              | 0.35            |
| MP:0001914                                                  | hemorrhage                                                         | 0.35            |
| MP:0011348                                                  | abnormal renal glomerulus basement membrane morphology             | 0.35            |
| ENSG00000147044                                             | CASK PPI subnetwork                                                | 0.35            |
| GO:0043627                                                  | response to estrogen stimulus                                      | 0.35            |
| ENSG00000037042                                             | TUBG2 PPI subnetwork                                               | 0.35            |
| ENSG00000164692                                             | COL1A2 PPI subnetwork                                              | 0.35            |
| MP:0005348                                                  | increased T cell proliferation                                     | 0.35            |
| ENSG00000100697                                             | DICER1 PPI subnetwork                                              | 0.35            |
| MP:0001326                                                  | retinal degeneration                                               | 0.35            |
| ENSG00000047056                                             | WDR37 PPI subnetwork                                               | 0.35            |
| MP:0003997                                                  | tonic-clonic seizures                                              | 0.35            |
| ENSG00000173889                                             | PHC3 PPI subnetwork                                                | 0.35            |
| MP:0000921                                                  | demyelination                                                      | 0.35            |
| GO:0045088                                                  | regulation of innate immune response                               | 0.35            |
| ENSG00000110245                                             | APOC3 PPI subnetwork                                               | 0.35            |
| ENSG00000215755                                             | ENSG00000215755 PPI subnetwork                                     | 0.35            |
| KEGG_NATURAL_KILLER_CELL_MEDIATED_CYTOTOXICITY              | KEGG_NATURAL_KILLER_CELL_MEDIATED_CYTOTOXICITY                     | 0.35            |
| GO:0002429                                                  | immune response-activating cell surface receptor signaling pathway | 0.35            |
| GO:0004835                                                  | tubulin-tyrosine ligase activity                                   | 0.35            |
| ENSG00000130520                                             | LSM4 PPI subnetwork                                                | 0.35            |
| REACTOME_FORMATION_OF_THE_TERNARY_COMPLEX_AND_SUBSEQUENTLY_ | REACTOME_FORMATION_OF_THE_TERNARY_COMPLEX_AND_SUBSEQUENTLY_        | 0.35            |
| GO:0045621                                                  | positive regulation of lymphocyte differentiator                   | 0.35            |
| REACTOME_ACTIVATED_TLR4_SIGNALLING                          | REACTOME_ACTIVATED_TLR4_SIGNALLING                                 | 0.35            |
| ENSG00000086232                                             | EIF2AK1 PPI subnetwork                                             | 0.35            |
| REACTOME_TRANSLOCATION_OF_ZAP:70_TO_IMMUNOLOGICAL_SYNAPSE   | REACTOME_TRANSLOCATION_OF_ZAP:70_TO_IMMUNOLOGICAL_SYNAPSE          | 0.35            |
| MP:0001844                                                  | autoimmune response                                                | 0.35            |
| GO:0030335                                                  | positive regulation of cell migration                              | 0.35            |
| ENSG00000114737                                             | CISH PPI subnetwork                                                | 0.35            |
| GO:0006820                                                  | anion transport                                                    | 0.35            |
| GO:0007088                                                  | regulation of mitosis                                              | 0.35            |
| GO:0051783                                                  | regulation of nuclear division                                     | 0.35            |
| MP:0008071                                                  | absent B cells                                                     | 0.35            |
| GO:0042098                                                  | T cell proliferation                                               | 0.35            |
| REACTOME_GAP_JUNCTION_ASSEMBLY                              | REACTOME_GAP_JUNCTION_ASSEMBLY                                     | 0.35            |

**Original gene set ID****Original gene set description****Nominal P value**

|                                                     |                                                                                |      |
|-----------------------------------------------------|--------------------------------------------------------------------------------|------|
| GO:0042481                                          | regulation of odontogenesis                                                    | 0.35 |
| GO:0008643                                          | carbohydrate transport                                                         | 0.35 |
| ENSG00000099725                                     | ENSG00000099725 PPI subnetwork                                                 | 0.35 |
| GO:0018410                                          | C-terminal protein amino acid modification                                     | 0.35 |
| ENSG00000157227                                     | MMP14 PPI subnetwork                                                           | 0.35 |
| MP:0001158                                          | abnormal prostate gland morphology                                             | 0.35 |
| ENSG00000105085                                     | MED26 PPI subnetwork                                                           | 0.35 |
| ENSG00000212908                                     | ENSG00000212908 PPI subnetwork                                                 | 0.35 |
| ENSG00000213416                                     | KRTAP4-12 PPI subnetwork                                                       | 0.35 |
| GO:0001782                                          | B cell homeostasis                                                             | 0.35 |
| ENSG00000115946                                     | PNO1 PPI subnetwork                                                            | 0.35 |
| GO:0071305                                          | cellular response to vitamin D                                                 | 0.35 |
| GO:0006107                                          | oxaloacetate metabolic process                                                 | 0.35 |
| GO:0070988                                          | demethylation                                                                  | 0.35 |
| GO:0018279                                          | protein N-linked glycosylation via asparagine                                  | 0.35 |
| GO:0018196                                          | peptidyl-asparagine modification                                               | 0.35 |
| ENSG00000118985                                     | ELL2 PPI subnetwork                                                            | 0.35 |
| ENSG00000206212                                     | ENSG00000206212 PPI subnetwork                                                 | 0.35 |
| ENSG00000182498                                     | ENSG00000182498 PPI subnetwork                                                 | 0.35 |
| ENSG00000096150                                     | RPS18 PPI subnetwork                                                           | 0.35 |
| GO:0046847                                          | filopodium assembly                                                            | 0.35 |
| ENSG00000135387                                     | CAPRIN1 PPI subnetwork                                                         | 0.35 |
| MP:0011090                                          | partial perinatal lethality                                                    | 0.35 |
| GO:0032369                                          | negative regulation of lipid transport                                         | 0.35 |
| GO:0002821                                          | positive regulation of adaptive immune response                                | 0.35 |
| ENSG00000111537                                     | IFNG PPI subnetwork                                                            | 0.35 |
| ENSG00000135404                                     | CD63 PPI subnetwork                                                            | 0.35 |
| GO:0009156                                          | ribonucleoside monophosphate biosynthetic process                              | 0.35 |
| ENSG00000123091                                     | RNF11 PPI subnetwork                                                           | 0.35 |
| GO:0051905                                          | establishment of pigment granule localization                                  | 0.35 |
| MP:0002357                                          | abnormal spleen white pulp morphology                                          | 0.35 |
| GO:0045582                                          | positive regulation of T cell differentiation                                  | 0.35 |
| GO:0051098                                          | regulation of binding                                                          | 0.35 |
| GO:0005839                                          | proteasome core complex                                                        | 0.35 |
| MP:0004704                                          | short vertebral column                                                         | 0.35 |
| REACTOME_PHOSPHORYLATION_OF_CD3_AND_TCR_ZETA_CHAINS | REACTOME_PHOSPHORYLATION_OF_CD3_AND_TCR_ZETA_CHAINS                            | 0.35 |
| ENSG00000167552                                     | TUBA1A PPI subnetwork                                                          | 0.35 |
| ENSG00000136931                                     | NR5A1 PPI subnetwork                                                           | 0.35 |
| ENSG00000119953                                     | SMNDC1 PPI subnetwork                                                          | 0.35 |
| GO:0017053                                          | transcriptional repressor complex                                              | 0.35 |
| ENSG00000130203                                     | APOE PPI subnetwork                                                            | 0.35 |
| GO:0015662                                          | ATPase activity, coupled to transmembrane movement of ions, phosphorylative me | 0.35 |
| ENSG00000145423                                     | SFRP2 PPI subnetwork                                                           | 0.35 |
| GO:0071375                                          | cellular response to peptide hormone stimulus                                  | 0.35 |
| GO:0030318                                          | melanocyte differentiation                                                     | 0.35 |
| GO:0030595                                          | leukocyte chemotaxis                                                           | 0.35 |
| GO:0030036                                          | actin cytoskeleton organization                                                | 0.35 |
| ENSG00000139515                                     | PDX1 PPI subnetwork                                                            | 0.35 |
| ENSG00000006075                                     | CCL3 PPI subnetwork                                                            | 0.35 |

| <b>Original gene set ID</b>                                 | <b>Original gene set description</b>                        | <b>Nominal P value</b> |
|-------------------------------------------------------------|-------------------------------------------------------------|------------------------|
| MP:0001785                                                  | edema                                                       | 0.35                   |
| GO:0006956                                                  | complement activation                                       | 0.35                   |
| REACTOME_L1CAM_INTERACTIONS                                 | REACTOME_L1CAM_INTERACTIONS                                 | 0.35                   |
| REACTOME_GAP_JUNCTION_TRAFFICKING_AND_REGULATION            | REACTOME_GAP_JUNCTION_TRAFFICKING_AND_REGULATION            | 0.35                   |
| ENSG00000142892                                             | PIGK PPI subnetwork                                         | 0.35                   |
| KEGG_TOLL_LIKE_RECEPTOR_SIGNALING_PATHWAY                   | KEGG_TOLL_LIKE_RECEPTOR_SIGNALING_PATHWAY                   | 0.35                   |
| ENSG00000088356                                             | PDRG1 PPI subnetwork                                        | 0.35                   |
| MP:0004608                                                  | abnormal cervical axis morphology                           | 0.36                   |
| MP:0006029                                                  | abnormal sclerotome morphology                              | 0.36                   |
| ENSG00000077097                                             | TOP2B PPI subnetwork                                        | 0.36                   |
| MP:0006303                                                  | abnormal retinal nerve fiber layer morphology               | 0.36                   |
| ENSG00000184083                                             | FAM120C PPI subnetwork                                      | 0.36                   |
| MP:0002857                                                  | cochlear ganglion degeneration                              | 0.36                   |
| ENSG000000004799                                            | PDK4 PPI subnetwork                                         | 0.36                   |
| ENSG00000108826                                             | MRPL27 PPI subnetwork                                       | 0.36                   |
| ENSG00000138346                                             | DNA2 PPI subnetwork                                         | 0.36                   |
| ENSG00000178562                                             | CD28 PPI subnetwork                                         | 0.36                   |
| ENSG00000143748                                             | NVL PPI subnetwork                                          | 0.36                   |
| MP:0003051                                                  | curly tail                                                  | 0.36                   |
| MP:0006279                                                  | abnormal limb development                                   | 0.36                   |
| REACTOME_MITOTIC_G2:G2M_PHASES                              | REACTOME_MITOTIC_G2:G2M_PHASES                              | 0.36                   |
| ENSG00000136573                                             | BLK PPI subnetwork                                          | 0.36                   |
| GO:0046928                                                  | regulation of neurotransmitter secretion                    | 0.36                   |
| ENSG00000117091                                             | CD48 PPI subnetwork                                         | 0.36                   |
| GO:0035257                                                  | nuclear hormone receptor binding                            | 0.36                   |
| GO:0034142                                                  | toll-like receptor 4 signaling pathway                      | 0.36                   |
| ENSG00000084674                                             | APOB PPI subnetwork                                         | 0.36                   |
| GO:0006767                                                  | water-soluble vitamin metabolic process                     | 0.36                   |
| REACTOME_DOWNSTREAM_TCR_SIGNALING                           | REACTOME_DOWNSTREAM_TCR_SIGNALING                           | 0.36                   |
| ENSG00000104722                                             | NEFM PPI subnetwork                                         | 0.36                   |
| MP:0001175                                                  | abnormal lung morphology                                    | 0.36                   |
| REACTOME_ACTIVATION_OF_THE_PRE:REPLICATIVE_COMPLEX          | REACTOME_ACTIVATION_OF_THE_PRE:REPLICATIVE_COMPLEX          | 0.36                   |
| ENSG00000172845                                             | SP3 PPI subnetwork                                          | 0.36                   |
| GO:0035085                                                  | cilium axoneme                                              | 0.36                   |
| MP:0011091                                                  | complete prenatal lethality                                 | 0.36                   |
| ENSG00000126247                                             | CAPNS1 PPI subnetwork                                       | 0.36                   |
| MP:0008567                                                  | decreased interferon-gamma secretion                        | 0.36                   |
| ENSG00000134954                                             | ETS1 PPI subnetwork                                         | 0.36                   |
| GO:0043586                                                  | tongue development                                          | 0.36                   |
| ENSG00000085511                                             | MAP3K4 PPI subnetwork                                       | 0.36                   |
| GO:0004175                                                  | endopeptidase activity                                      | 0.36                   |
| GO:0016605                                                  | PML body                                                    | 0.36                   |
| ENSG00000093000                                             | NUP50 PPI subnetwork                                        | 0.36                   |
| ENSG00000165637                                             | VDAC2 PPI subnetwork                                        | 0.36                   |
| ENSG00000168918                                             | INPP5D PPI subnetwork                                       | 0.36                   |
| ENSG00000120802                                             | TMPO PPI subnetwork                                         | 0.36                   |
| REACTOME_TRIF_MEDIATED_TLR3_SIGNALING                       | REACTOME_TRIF_MEDIATED_TLR3_SIGNALING                       | 0.36                   |
| REACTOME_TOLL_LIKE_RECEPTOR_3_TLR3_CASCADE                  | REACTOME_TOLL_LIKE_RECEPTOR_3_TLR3_CASCADE                  | 0.36                   |
| REACTOME_RNA_POLYMERASE_I_RNA_POLYMERASE_III_AND_MITOCHONDR | REACTOME_RNA_POLYMERASE_I_RNA_POLYMERASE_III_AND_MITOCHONDR | 0.36                   |





| Original gene set ID                                            | Original gene set description                                                | Nominal P value |
|-----------------------------------------------------------------|------------------------------------------------------------------------------|-----------------|
| GO:0045672                                                      | positive regulation of osteoclast differentiation                            | 0.36            |
| GO:0005625                                                      | soluble fraction                                                             | 0.36            |
| GO:0006487                                                      | protein N-linked glycosylation                                               | 0.36            |
| MP:0008582                                                      | short photoreceptor inner segment                                            | 0.36            |
| ENSG00000147649                                                 | MTDH PPI subnetwork                                                          | 0.36            |
| GO:0046486                                                      | glycerolipid metabolic process                                               | 0.36            |
| KEGG_GLYCOSPHINGOLIPID_BIOSYNTHESIS_GLOBO_SERIES                | KEGG_GLYCOSPHINGOLIPID_BIOSYNTHESIS_GLOBO_SERIES                             | 0.36            |
| ENSG00000174175                                                 | SELP PPI subnetwork                                                          | 0.36            |
| GO:0005922                                                      | connexon complex                                                             | 0.36            |
| GO:0006493                                                      | protein O-linked glycosylation                                               | 0.36            |
| ENSG00000162613                                                 | FUBP1 PPI subnetwork                                                         | 0.36            |
| ENSG00000162924                                                 | REL PPI subnetwork                                                           | 0.36            |
| GO:0090257                                                      | regulation of muscle system process                                          | 0.36            |
| MP:0009937                                                      | abnormal neuron differentiation                                              | 0.36            |
| MP:0000164                                                      | abnormal cartilage development                                               | 0.36            |
| MP:0004982                                                      | abnormal osteoclast morphology                                               | 0.36            |
| REACTOME_NFKB_AND_MAP_KINASES_ACTIVATION_MEDIATED_BY_TLR4_SIGI  | REACTOME_NFKB_AND_MAP_KINASES_ACTIVATION_MEDIATED_BY_TLR4_SIGNALI            | 0.36            |
| GO:0008656                                                      | cysteine-type endopeptidase activator activity involved in apoptotic proces: | 0.36            |
| GO:0018298                                                      | protein-chromophore linkage                                                  | 0.36            |
| ENSG00000112282                                                 | MED23 PPI subnetwork                                                         | 0.36            |
| ENSG00000114209                                                 | PDCD10 PPI subnetwork                                                        | 0.36            |
| GO:0061035                                                      | regulation of cartilage development                                          | 0.36            |
| MP:0008641                                                      | increased circulating interleukin-1 beta leve                                | 0.36            |
| KEGG_GLYCEROPHOSPHOLIPID_METABOLISM                             | KEGG_GLYCEROPHOSPHOLIPID_METABOLISM                                          | 0.36            |
| GO:0050931                                                      | pigment cell differentiation                                                 | 0.36            |
| GO:0009408                                                      | response to heat                                                             | 0.36            |
| REACTOME_ENDOGENOUS_STEROLS                                     | REACTOME_ENDOGENOUS_STEROLS                                                  | 0.36            |
| GO:0001916                                                      | positive regulation of T cell mediated cytotoxicity                          | 0.36            |
| GO:0046949                                                      | fatty-acyl-CoA biosynthetic process                                          | 0.36            |
| GO:0035337                                                      | fatty-acyl-CoA metabolic process                                             | 0.36            |
| REACTOME_CONVERSION_FROM_APCCDC20_TO_APCCCDH1_IN_LATE_ANAPI     | REACTOME_CONVERSION_FROM_APCCDC20_TO_APCCCDH1_IN_LATE_ANAPHASI               | 0.36            |
| GO:0007141                                                      | male meiosis I                                                               | 0.36            |
| ENSG00000153395                                                 | LPCAT1 PPI subnetwork                                                        | 0.36            |
| MP:0008540                                                      | abnormal cerebrum morphology                                                 | 0.36            |
| REACTOME_MYD88:INDEPENDENT_CASCADE_INITIATED_ON_PLASMA_MEMBR    | REACTOME_MYD88:INDEPENDENT_CASCADE_INITIATED_ON_PLASMA_MEMBRANI              | 0.37            |
| GO:0070936                                                      | protein K48-linked ubiquitination                                            | 0.37            |
| REACTOME_REGULATION_OF_INSULIN:LIKE_GROWTH_FACTOR_IGF_ACTIVITY_ | REACTOME_REGULATION_OF_INSULIN:LIKE_GROWTH_FACTOR_IGF_ACTIVITY_BY_           | 0.37            |
| MP:0003651                                                      | abnormal axon outgrowth                                                      | 0.37            |
| GO:0005923                                                      | tight junction                                                               | 0.37            |
| GO:0070160                                                      | occluding junction                                                           | 0.37            |
| GO:0008037                                                      | cell recognition                                                             | 0.37            |
| GO:0070193                                                      | synaptonemal complex organization                                            | 0.37            |
| ENSG00000165630                                                 | PRPF18 PPI subnetwork                                                        | 0.37            |
| ENSG00000184110                                                 | EIF3C PPI subnetwork                                                         | 0.37            |
| ENSG00000149187                                                 | CEL1 PPI subnetwork                                                          | 0.37            |
| ENSG00000066336                                                 | SPI1 PPI subnetwork                                                          | 0.37            |
| GO:0005516                                                      | calmodulin binding                                                           | 0.37            |
| GO:0003016                                                      | respiratory system process                                                   | 0.37            |
| ENSG00000185236                                                 | RAB11B PPI subnetwork                                                        | 0.37            |







| Original gene set ID                                             | Original gene set description                                    | Nominal P value |
|------------------------------------------------------------------|------------------------------------------------------------------|-----------------|
| GO:0048589                                                       | developmental growth                                             | 0.38            |
| ENSG00000100347                                                  | SAMM50 PPI subnetwork                                            | 0.38            |
| MP:0004751                                                       | increased length of allograft survival                           | 0.38            |
| GO:0042562                                                       | hormone binding                                                  | 0.38            |
| MP:0004618                                                       | thoracic vertebral transformation                                | 0.38            |
| MP:0005070                                                       | impaired NK cell cytotoxicity                                    | 0.38            |
| ENSG00000169783                                                  | LINGO1 PPI subnetwork                                            | 0.38            |
| ENSG00000171530                                                  | TBCA PPI subnetwork                                              | 0.38            |
| ENSG00000164053                                                  | ATRIP PPI subnetwork                                             | 0.38            |
| ENSG00000139083                                                  | ETV6 PPI subnetwork                                              | 0.38            |
| REACTOME_SEMA4D_INDUCED_CELL_MIGRATION_AND_GROWTH: CONE_COLLAPSE | REACTOME_SEMA4D_INDUCED_CELL_MIGRATION_AND_GROWTH: CONE_COLLAPSE | 0.38            |
| GO:0042493                                                       | response to drug                                                 | 0.38            |
| ENSG00000101084                                                  | C20orf24 PPI subnetwork                                          | 0.38            |
| REACTOME_INSULIN_RECEPTOR_SIGNALING_CASCADE                      | REACTOME_INSULIN_RECEPTOR_SIGNALING_CASCADE                      | 0.38            |
| GO:0043560                                                       | insulin receptor substrate binding                               | 0.38            |
| GO:0007339                                                       | binding of sperm to zona pellucida                               | 0.38            |
| MP:0008168                                                       | decreased B-1a cell number                                       | 0.38            |
| ENSG00000137841                                                  | PLCB2 PPI subnetwork                                             | 0.38            |
| ENSG00000150995                                                  | ITPR1 PPI subnetwork                                             | 0.38            |
| GO:0050851                                                       | antigen receptor-mediated signaling pathway                      | 0.38            |
| REACTOME_CHAPERONIN_MEDIATED_PROTEIN_FOLDING                     | REACTOME_CHAPERONIN_MEDIATED_PROTEIN_FOLDING                     | 0.38            |
| GO:0034433                                                       | steroid esterification                                           | 0.38            |
| GO:0034435                                                       | cholesterol esterification                                       | 0.38            |
| GO:0034434                                                       | sterol esterification                                            | 0.38            |
| GO:0009108                                                       | coenzyme biosynthetic process                                    | 0.38            |
| MP:0005616                                                       | decreased susceptibility to type IV hypersensitivity reaction    | 0.38            |
| GO:0031527                                                       | filopodium membrane                                              | 0.38            |
| MP:0004007                                                       | abnormal lung vasculature morphology                             | 0.38            |
| ENSG00000205022                                                  | PABPN1L PPI subnetwork                                           | 0.38            |
| ENSG00000138696                                                  | BMPR1B PPI subnetwork                                            | 0.38            |
| ENSG00000142657                                                  | PGD PPI subnetwork                                               | 0.38            |
| MP:0002451                                                       | abnormal macrophage physiology                                   | 0.38            |
| GO:0042445                                                       | hormone metabolic process                                        | 0.38            |
| MP:0008261                                                       | arrest of male meiosis                                           | 0.38            |
| GO:0000146                                                       | microfilament motor activity                                     | 0.38            |
| MP:0000564                                                       | syndactyly                                                       | 0.38            |
| MP:0002339                                                       | abnormal lymph node morphology                                   | 0.38            |
| MP:0004919                                                       | abnormal positive T cell selection                               | 0.38            |
| ENSG00000196083                                                  | IL1RAP PPI subnetwork                                            | 0.38            |
| ENSG00000142871                                                  | CYR61 PPI subnetwork                                             | 0.38            |
| GO:0009988                                                       | cell-cell recognition                                            | 0.38            |
| ENSG00000143466                                                  | IKBKE PPI subnetwork                                             | 0.38            |
| ENSG00000148175                                                  | STOM PPI subnetwork                                              | 0.38            |
| GO:0048864                                                       | stem cell development                                            | 0.38            |
| ENSG00000143768                                                  | LEFTY2 PPI subnetwork                                            | 0.38            |
| GO:0010564                                                       | regulation of cell cycle process                                 | 0.38            |
| REACTOME_GLUCOSE_TRANSPORT                                       | REACTOME_GLUCOSE_TRANSPORT                                       | 0.38            |
| GO:0002279                                                       | mast cell activation involved in immune response                 | 0.38            |
| GO:0001667                                                       | ameboidal cell migration                                         | 0.38            |

| Original gene set ID                                         | Original gene set description                                | Nominal P value |
|--------------------------------------------------------------|--------------------------------------------------------------|-----------------|
| ENSG00000100612                                              | DHRS7 PPI subnetwork                                         | 0.38            |
| ENSG00000149182                                              | ARFGAP2 PPI subnetwork                                       | 0.38            |
| ENSG00000114353                                              | GNAI2 PPI subnetwork                                         | 0.38            |
| GO:0030426                                                   | growth cone                                                  | 0.38            |
| REACTOME_PECAM1_INTERACTIONS                                 | REACTOME_PECAM1_INTERACTIONS                                 | 0.38            |
| MP:0002442                                                   | abnormal leukocyte physiology                                | 0.38            |
| MP:0008673                                                   | decreased interleukin-13 secretion                           | 0.38            |
| MP:0003564                                                   | abnormal insulin secretion                                   | 0.38            |
| MP:0003447                                                   | decreased tumor growth/size                                  | 0.38            |
| ENSG00000148248                                              | SURF4 PPI subnetwork                                         | 0.38            |
| ENSG00000104131                                              | EIF3J PPI subnetwork                                         | 0.38            |
| GO:0051056                                                   | regulation of small GTPase mediated signal transduction      | 0.38            |
| ENSG00000124571                                              | XPO5 PPI subnetwork                                          | 0.38            |
| MP:0004527                                                   | abnormal outer hair cell stereociliary bundle morphology     | 0.38            |
| REACTOME_PROSTANOID_METABOLISM                               | REACTOME_PROSTANOID_METABOLISM                               | 0.38            |
| ENSG00000121022                                              | COP5 PPI subnetwork                                          | 0.38            |
| ENSG00000153233                                              | PTPRR PPI subnetwork                                         | 0.38            |
| ENSG00000115761                                              | NOL10 PPI subnetwork                                         | 0.39            |
| MP:0000035                                                   | abnormal membranous labyrinth morphology                     | 0.39            |
| ENSG00000172379                                              | ARNT2 PPI subnetwork                                         | 0.39            |
| ENSG00000142539                                              | SPIB PPI subnetwork                                          | 0.39            |
| ENSG00000184937                                              | WT1 PPI subnetwork                                           | 0.39            |
| GO:0005319                                                   | lipid transporter activity                                   | 0.39            |
| ENSG00000170860                                              | LSM3 PPI subnetwork                                          | 0.39            |
| ENSG00000164400                                              | CSF2 PPI subnetwork                                          | 0.39            |
| ENSG00000161647                                              | MPP3 PPI subnetwork                                          | 0.39            |
| GO:0005154                                                   | epidermal growth factor receptor binding                     | 0.39            |
| ENSG00000109906                                              | ZBTB16 PPI subnetwork                                        | 0.39            |
| ENSG00000141252                                              | VPS53 PPI subnetwork                                         | 0.39            |
| REACTOME_MAPK_TARGETS_NUCLEAR_EVENTS_MEDIATED_BY_MAP_KINASES | REACTOME_MAPK_TARGETS_NUCLEAR_EVENTS_MEDIATED_BY_MAP_KINASES | 0.39            |
| GO:0050731                                                   | positive regulation of peptidyl-tyrosine phosphorylation     | 0.39            |
| GO:0051693                                                   | actin filament capping                                       | 0.39            |
| REACTOME_DIABETES_PATHWAYS                                   | REACTOME_DIABETES_PATHWAYS                                   | 0.39            |
| GO:0005583                                                   | fibrillar collagen                                           | 0.39            |
| ENSG00000152583                                              | SPARCL1 PPI subnetwork                                       | 0.39            |
| ENSG00000129625                                              | REEP5 PPI subnetwork                                         | 0.39            |
| ENSG00000109819                                              | PPARGC1A PPI subnetwork                                      | 0.39            |
| ENSG00000124783                                              | SSR1 PPI subnetwork                                          | 0.39            |
| ENSG00000215719                                              | ENSG00000215719 PPI subnetwork                               | 0.39            |
| ENSG00000205155                                              | PSENEN PPI subnetwork                                        | 0.39            |
| MP:0008725                                                   | enlarged heart atrium                                        | 0.39            |
| GO:0035295                                                   | tube development                                             | 0.39            |
| MP:0010029                                                   | abnormal basicranium morphology                              | 0.39            |
| ENSG00000181656                                              | GPR88 PPI subnetwork                                         | 0.39            |
| ENSG00000011405                                              | PIK3C2A PPI subnetwork                                       | 0.39            |
| MP:0004136                                                   | abnormal tongue muscle morphology                            | 0.39            |
| GO:0015175                                                   | neutral amino acid transmembrane transporter activity        | 0.39            |
| ENSG00000179715                                              | FAM113B PPI subnetwork                                       | 0.39            |
| MP:0001651                                                   | necrosis                                                     | 0.39            |

| Original gene set ID                                              | Original gene set description                                                         | Nominal P value |
|-------------------------------------------------------------------|---------------------------------------------------------------------------------------|-----------------|
| REACTOME_GRB2SOS_PROVIDES_LINKAGE_TO_MAPK_SIGNALING_FOR_INTERGRIN | REACTOME_GRB2SOS_PROVIDES_LINKAGE_TO_MAPK_SIGNALING_FOR_INTERGRIN                     | 0.39            |
| GO:0007608                                                        | sensory perception of smell                                                           | 0.39            |
| MP:0000220                                                        | increased monocyte cell number                                                        | 0.39            |
| GO:0022604                                                        | regulation of cell morphogenesis                                                      | 0.39            |
| MP:0002407                                                        | abnormal double-negative T cell morphology                                            | 0.39            |
| GO:0030834                                                        | regulation of actin filament depolymerization                                         | 0.39            |
| GO:0033522                                                        | histone H2A ubiquitination                                                            | 0.39            |
| MP:0000039                                                        | abnormal otic capsule morphology                                                      | 0.39            |
| ENSG00000116213                                                   | WRAP73 PPI subnetwork                                                                 | 0.39            |
| MP:0003123                                                        | paternal imprinting                                                                   | 0.39            |
| MP:0006355                                                        | abnormal sixth branchial arch artery morphology                                       | 0.39            |
| MP:0011104                                                        | partial embryonic lethality before implantation                                       | 0.39            |
| GO:0032868                                                        | response to insulin stimulus                                                          | 0.39            |
| GO:0051303                                                        | establishment of chromosome localization                                              | 0.39            |
| GO:0050000                                                        | chromosome localization                                                               | 0.39            |
| GO:0051875                                                        | pigment granule localization                                                          | 0.39            |
| GO:0007031                                                        | peroxisome organization                                                               | 0.39            |
| ENSG00000010803                                                   | SCMH1 PPI subnetwork                                                                  | 0.39            |
| GO:0001750                                                        | photoreceptor outer segment                                                           | 0.39            |
| GO:0030674                                                        | protein binding, bridging                                                             | 0.39            |
| GO:0016628                                                        | oxidoreductase activity, acting on the CH-CH group of donors, NAD or NADP as acceptor | 0.39            |
| MP:0008584                                                        | photoreceptor outer segment degeneration                                              | 0.39            |
| ENSG00000063322                                                   | MED29 PPI subnetwork                                                                  | 0.39            |
| MP:0000495                                                        | abnormal colon morphology                                                             | 0.39            |
| ENSG00000015475                                                   | BID PPI subnetwork                                                                    | 0.39            |
| MP:0000556                                                        | abnormal hindlimb morphology                                                          | 0.39            |
| ENSG000000174804                                                  | FZD4 PPI subnetwork                                                                   | 0.39            |
| ENSG000000170653                                                  | ATF7 PPI subnetwork                                                                   | 0.39            |
| REACTOME_INTRINSIC_PATHWAY_FOR_APOPTOSIS                          | REACTOME_INTRINSIC_PATHWAY_FOR_APOPTOSIS                                              | 0.39            |
| GO:0045580                                                        | regulation of T cell differentiation                                                  | 0.39            |
| GO:0017046                                                        | peptide hormone binding                                                               | 0.39            |
| KEGG_STARCH_AND_SUCROSE_METABOLISM                                | KEGG_STARCH_AND_SUCROSE_METABOLISM                                                    | 0.39            |
| GO:0006501                                                        | C-terminal protein lipidation                                                         | 0.39            |
| ENSG000000162105                                                  | SHANK2 PPI subnetwork                                                                 | 0.39            |
| ENSG000000084623                                                  | EIF3I PPI subnetwork                                                                  | 0.39            |
| KEGG_MELANOGENESIS                                                | KEGG_MELANOGENESIS                                                                    | 0.39            |
| ENSG000000115947                                                  | ORC4 PPI subnetwork                                                                   | 0.39            |
| ENSG000000110107                                                  | PRPF19 PPI subnetwork                                                                 | 0.39            |
| MP:0002358                                                        | abnormal spleen periaerterial lymphoid sheath morphology                              | 0.39            |
| ENSG000000105404                                                  | RABAC1 PPI subnetwork                                                                 | 0.39            |
| GO:0016922                                                        | ligand-dependent nuclear receptor binding                                             | 0.39            |
| ENSG000000131043                                                  | C20orf4 PPI subnetwork                                                                | 0.39            |
| MP:0002455                                                        | abnormal dendritic cell antigen presentation                                          | 0.39            |
| GO:0002708                                                        | positive regulation of lymphocyte mediated immunity                                   | 0.39            |
| GO:0002705                                                        | positive regulation of leukocyte mediated immunity                                    | 0.39            |
| ENSG000000123349                                                  | PFDN5 PPI subnetwork                                                                  | 0.39            |
| MP:0005657                                                        | abnormal neural plate morphology                                                      | 0.39            |
| GO:0030672                                                        | synaptic vesicle membrane                                                             | 0.39            |
| GO:0046822                                                        | regulation of nucleocytoplasmic transport                                             | 0.39            |

| Original gene set ID                                  | Original gene set description                                                | Nominal P value |
|-------------------------------------------------------|------------------------------------------------------------------------------|-----------------|
| GO:0002768                                            | immune response-regulating cell surface receptor signaling pathway           | 0.39            |
| ENSG00000120949                                       | TNFRSF8 PPI subnetwork                                                       | 0.39            |
| ENSG00000189308                                       | LINS4 PPI subnetwork                                                         | 0.39            |
| MP:0008098                                            | decreased plasma cell number                                                 | 0.39            |
| ENSG00000101255                                       | TRIB3 PPI subnetwork                                                         | 0.39            |
| ENSG00000108604                                       | SMARCD2 PPI subnetwork                                                       | 0.39            |
| REACTOME_FGFR_LIGAND_BINDING_AND_ACTIVATION           | REACTOME_FGFR_LIGAND_BINDING_AND_ACTIVATION                                  | 0.39            |
| GO:0016573                                            | histone acetylation                                                          | 0.39            |
| ENSG00000168283                                       | BMI1 PPI subnetwork                                                          | 0.39            |
| GO:0006518                                            | peptide metabolic process                                                    | 0.39            |
| GO:0001909                                            | leukocyte mediated cytotoxicity                                              | 0.39            |
| GO:0005980                                            | glycogen catabolic process                                                   | 0.39            |
| ENSG00000198176                                       | TFDP1 PPI subnetwork                                                         | 0.39            |
| GO:0019079                                            | viral genome replication                                                     | 0.39            |
| ENSG00000198301                                       | SDAD1 PPI subnetwork                                                         | 0.39            |
| GO:0016877                                            | ligase activity, forming carbon-sulfur bonds                                 | 0.39            |
| GO:0002694                                            | regulation of leukocyte activation                                           | 0.39            |
| ENSG00000196535                                       | MYO18A PPI subnetwork                                                        | 0.39            |
| GO:0033189                                            | response to vitamin A                                                        | 0.39            |
| MP:0002801                                            | abnormal long term object recognition memory                                 | 0.39            |
| GO:0005763                                            | mitochondrial small ribosomal subunit                                        | 0.39            |
| GO:0000314                                            | organellar small ribosomal subunit                                           | 0.39            |
| ENSG00000122140                                       | MRPS2 PPI subnetwork                                                         | 0.39            |
| GO:0006401                                            | RNA catabolic process                                                        | 0.39            |
| ENSG00000102900                                       | NUP93 PPI subnetwork                                                         | 0.39            |
| ENSG00000120697                                       | ALG5 PPI subnetwork                                                          | 0.39            |
| ENSG00000068903                                       | SIRT2 PPI subnetwork                                                         | 0.39            |
| ENSG00000175482                                       | POLD4 PPI subnetwork                                                         | 0.39            |
| ENSG00000154518                                       | ATP5G3 PPI subnetwork                                                        | 0.39            |
| GO:0008630                                            | DNA damage response, signal transduction resulting in induction of apoptosis | 0.39            |
| MP:0000961                                            | abnormal dorsal root ganglion morphology                                     | 0.39            |
| ENSG00000166582                                       | CENPV PPI subnetwork                                                         | 0.39            |
| MP:0002211                                            | abnormal primary sex determination                                           | 0.39            |
| GO:0006839                                            | mitochondrial transport                                                      | 0.39            |
| ENSG00000103319                                       | EEF2K PPI subnetwork                                                         | 0.39            |
| ENSG00000177602                                       | GSG2 PPI subnetwork                                                          | 0.39            |
| GO:0030705                                            | cytoskeleton-dependent intracellular transport                               | 0.39            |
| ENSG00000164776                                       | PHKG1 PPI subnetwork                                                         | 0.39            |
| GO:0048284                                            | organelle fusion                                                             | 0.39            |
| ENSG00000168495                                       | POLR3D PPI subnetwork                                                        | 0.39            |
| ENSG00000090020                                       | SLC9A1 PPI subnetwork                                                        | 0.39            |
| ENSG00000132341                                       | RAN PPI subnetwork                                                           | 0.39            |
| MP:0001005                                            | abnormal retinal rod cell morphology                                         | 0.39            |
| REACTOME_ACETYLCHOLINE_NEUROTRANSMITTER_RELEASE_CYCLE | REACTOME_ACETYLCHOLINE_NEUROTRANSMITTER_RELEASE_CYCLE                        | 0.39            |
| MP:0008056                                            | abnormal retinal ganglion cell morphology                                    | 0.39            |
| KEGG_DNA_REPLICATION                                  | KEGG_DNA_REPLICATION                                                         | 0.39            |
| MP:0003105                                            | abnormal heart atrium morphology                                             | 0.39            |
| GO:0015838                                            | betaine transport                                                            | 0.39            |
| GO:0015879                                            | carnitine transport                                                          | 0.39            |



| Original gene set ID                                        | Original gene set description                                  | Nominal P value |
|-------------------------------------------------------------|----------------------------------------------------------------|-----------------|
| ENSG00000108797                                             | CNTNAP1 PPI subnetwork                                         | 0.39            |
| MP:0000743                                                  | muscle spasm                                                   | 0.39            |
| ENSG00000175216                                             | CKAP5 PPI subnetwork                                           | 0.39            |
| GO:0040017                                                  | positive regulation of locomotion                              | 0.39            |
| ENSG00000183943                                             | PRKX PPI subnetwork                                            | 0.39            |
| GO:0045880                                                  | positive regulation of smoothened signaling pathway            | 0.39            |
| MP:0004567                                                  | decreased myocardial fiber number                              | 0.39            |
| MP:0002599                                                  | increased mean platelet volume                                 | 0.4             |
| GO:0008305                                                  | integrin complex                                               | 0.4             |
| ENSG00000174125                                             | TLR1 PPI subnetwork                                            | 0.4             |
| MP:0008596                                                  | increased circulating interleukin-6 level                      | 0.4             |
| MP:0002258                                                  | abnormal cricoid cartilage morphology                          | 0.4             |
| GO:0043304                                                  | regulation of mast cell degranulation                          | 0.4             |
| ENSG00000172795                                             | DCP2 PPI subnetwork                                            | 0.4             |
| ENSG00000105649                                             | RAB3A PPI subnetwork                                           | 0.4             |
| REACTOME_CENTROSOME_MATURATION                              | REACTOME_CENTROSOME_MATURATION                                 | 0.4             |
| REACTOME_RECRUITMENT_OF_MITOTIC_CENTROSOME_PROTEINS_AND_COM | REACTOME_RECRUITMENT_OF_MITOTIC_CENTROSOME_PROTEINS_AND_COMPLE | 0.4             |
| GO:0030218                                                  | erythrocyte differentiation                                    | 0.4             |
| MP:0000717                                                  | abnormal lymphocyte cell number                                | 0.4             |
| GO:0034138                                                  | toll-like receptor 3 signaling pathway                         | 0.4             |
| REACTOME_G2M_TRANSITION                                     | REACTOME_G2M_TRANSITION                                        | 0.4             |
| GO:0045787                                                  | positive regulation of cell cycle                              | 0.4             |
| GO:0030010                                                  | establishment of cell polarity                                 | 0.4             |
| KEGG_VEGF_SIGNALING_PATHWAY                                 | KEGG_VEGF_SIGNALING_PATHWAY                                    | 0.4             |
| MP:0001385                                                  | pup cannibalization                                            | 0.4             |
| GO:0033002                                                  | muscle cell proliferation                                      | 0.4             |
| GO:0061061                                                  | muscle structure development                                   | 0.4             |
| ENSG00000112306                                             | RPS12 PPI subnetwork                                           | 0.4             |
| GO:0007423                                                  | sensory organ development                                      | 0.4             |
| GO:0009067                                                  | aspartate family amino acid biosynthetic process               | 0.4             |
| GO:0005730                                                  | nucleolus                                                      | 0.4             |
| REACTOME_INFLUENZA_INFECTION                                | REACTOME_INFLUENZA_INFECTION                                   | 0.4             |
| KEGG_BLADDER_CANCER                                         | KEGG_BLADDER_CANCER                                            | 0.4             |
| ENSG00000156508                                             | EEF1A1 PPI subnetwork                                          | 0.4             |
| ENSG00000004897                                             | CDC27 PPI subnetwork                                           | 0.4             |
| ENSG00000077080                                             | ACTL6B PPI subnetwork                                          | 0.4             |
| KEGG_METABOLISM_OF_XENOBIOTICS_BY_CYTOCHROME_P450           | KEGG_METABOLISM_OF_XENOBIOTICS_BY_CYTOCHROME_P450              | 0.4             |
| GO:0032587                                                  | ruffle membrane                                                | 0.4             |
| ENSG00000115310                                             | RTN4 PPI subnetwork                                            | 0.4             |
| GO:0003208                                                  | cardiac ventricle morphogenesis                                | 0.4             |
| GO:0002697                                                  | regulation of immune effector process                          | 0.4             |
| ENSG00000141456                                             | ENSG00000141456 PPI subnetwork                                 | 0.4             |
| ENSG00000003400                                             | CASP10 PPI subnetwork                                          | 0.4             |
| GO:0048041                                                  | focal adhesion assembly                                        | 0.4             |
| ENSG00000158373                                             | HIST1H2BD PPI subnetwork                                       | 0.4             |
| ENSG00000101246                                             | ARFRP1 PPI subnetwork                                          | 0.4             |
| MP:0008277                                                  | abnormal sternum ossification                                  | 0.4             |
| ENSG00000136504                                             | KAT7 PPI subnetwork                                            | 0.4             |
| ENSG00000100767                                             | PAPLN PPI subnetwork                                           | 0.4             |

| <b>Original gene set ID</b>      | <b>Original gene set description</b>                                          | <b>Nominal P value</b> |
|----------------------------------|-------------------------------------------------------------------------------|------------------------|
| GO:0042813                       | Wnt-activated receptor activity                                               | 0.4                    |
| REACTOME_MEIOTIC_SYNAPSIS        | REACTOME_MEIOTIC_SYNAPSIS                                                     | 0.4                    |
| GO:0002460                       | adaptive immune response based on somatic recombination of immune receptors b | 0.4                    |
| ENSG00000147145                  | LPAR4 PPI subnetwork                                                          | 0.4                    |
| GO:0032392                       | DNA geometric change                                                          | 0.4                    |
| GO:0032508                       | DNA duplex unwinding                                                          | 0.4                    |
| ENSG00000071462                  | WBSR22 PPI subnetwork                                                         | 0.4                    |
| ENSG00000182899                  | RPL35A PPI subnetwork                                                         | 0.4                    |
| MP:0000322                       | increased granulocyte number                                                  | 0.4                    |
| ENSG00000183751                  | TBL3 PPI subnetwork                                                           | 0.4                    |
| MP:0009890                       | cleft secondary palate                                                        | 0.4                    |
| ENSG00000132646                  | PCNA PPI subnetwork                                                           | 0.4                    |
| ENSG00000100325                  | ASCC2 PPI subnetwork                                                          | 0.4                    |
| GO:0006662                       | glycerol ether metabolic process                                              | 0.4                    |
| ENSG00000116750                  | UCLH5 PPI subnetwork                                                          | 0.4                    |
| GO:0007140                       | male meiosis                                                                  | 0.4                    |
| MP:0001751                       | increased circulating luteinizing hormone leve                                | 0.4                    |
| ENSG00000168040                  | FADD PPI subnetwork                                                           | 0.4                    |
| GO:0009214                       | cyclic nucleotide catabolic process                                           | 0.4                    |
| REACTOME_INTERLEUKIN:2_SIGNALING | REACTOME_INTERLEUKIN:2_SIGNALING                                              | 0.4                    |
| GO:0050865                       | regulation of cell activation                                                 | 0.4                    |
| MP:0004769                       | abnormal synaptic vesicle morphology                                          | 0.4                    |
| ENSG00000133026                  | MYH10 PPI subnetwork                                                          | 0.4                    |
| ENSG00000058600                  | POLR3E PPI subnetwork                                                         | 0.4                    |
| ENSG00000137574                  | TGS1 PPI subnetwork                                                           | 0.4                    |
| ENSG00000165806                  | CASP7 PPI subnetwork                                                          | 0.4                    |
| MP:0006092                       | abnormal olfactory neuron morphology                                          | 0.4                    |
| MP:0008045                       | decreased NK cell number                                                      | 0.4                    |
| ENSG00000163586                  | FABP1 PPI subnetwork                                                          | 0.4                    |
| MP:0004042                       | decreased susceptibility to kidney reperfusion injur                          | 0.4                    |
| GO:0043010                       | camera-type eye development                                                   | 0.4                    |
| MP:0005014                       | increased B cell number                                                       | 0.4                    |
| GO:0044441                       | cilium part                                                                   | 0.4                    |
| MP:0002260                       | abnormal thyroid cartilage morphology                                         | 0.4                    |
| GO:0003333                       | amino acid transmembrane transport                                            | 0.4                    |
| ENSG00000196136                  | SERPINA3 PPI subnetwork                                                       | 0.4                    |
| GO:0015294                       | solute:cation symporter activity                                              | 0.4                    |
| ENSG00000109458                  | GAB1 PPI subnetwork                                                           | 0.4                    |
| MP:0009146                       | abnormal pancreatic acinar cell morphology                                    | 0.4                    |
| ENSG00000067177                  | PHKA1 PPI subnetwork                                                          | 0.4                    |
| MP:0000820                       | abnormal choroid plexus morphology                                            | 0.4                    |
| GO:0050853                       | B cell receptor signaling pathway                                             | 0.4                    |
| GO:0003407                       | neural retina development                                                     | 0.4                    |
| ENSG00000116001                  | TIA1 PPI subnetwork                                                           | 0.4                    |
| ENSG00000187790                  | FANCM PPI subnetwork                                                          | 0.4                    |
| GO:0007435                       | salivary gland morphogenesis                                                  | 0.4                    |
| ENSG00000065183                  | WDR3 PPI subnetwork                                                           | 0.4                    |
| ENSG00000177600                  | RPLP2 PPI subnetwork                                                          | 0.4                    |
| GO:0005242                       | inward rectifier potassium channel activity                                   | 0.4                    |

| Original gene set ID | Original gene set description                                                    | Nominal P value |
|----------------------|----------------------------------------------------------------------------------|-----------------|
| ENSG00000204628      | GNB2L1 PPI subnetwork                                                            | 0.4             |
| ENSG00000142156      | COL6A1 PPI subnetwork                                                            | 0.4             |
| GO:0017022           | myosin binding                                                                   | 0.4             |
| ENSG00000141026      | MED9 PPI subnetwork                                                              | 0.4             |
| GO:0016502           | nucleotide receptor activity                                                     | 0.4             |
| GO:0001614           | purinergic nucleotide receptor activity                                          | 0.4             |
| ENSG00000117450      | PRDX1 PPI subnetwork                                                             | 0.4             |
| MP:0002168           | other aberrant phenotype                                                         | 0.4             |
| ENSG00000123358      | NR4A1 PPI subnetwork                                                             | 0.4             |
| GO:0044247           | cellular polysaccharide catabolic process                                        | 0.4             |
| GO:0009251           | glucan catabolic process                                                         | 0.4             |
| ENSG00000129282      | MRM1 PPI subnetwork                                                              | 0.4             |
| ENSG00000196277      | GRM7 PPI subnetwork                                                              | 0.4             |
| ENSG00000124762      | CDKN1A PPI subnetwork                                                            | 0.4             |
| ENSG0000010671       | BTK PPI subnetwork                                                               | 0.4             |
| ENSG00000159189      | C1QC PPI subnetwork                                                              | 0.4             |
| GO:0030042           | actin filament depolymerization                                                  | 0.4             |
| ENSG00000130312      | MRPL34 PPI subnetwork                                                            | 0.4             |
| GO:0021799           | cerebral cortex radially oriented cell migration                                 | 0.4             |
| MP:0000531           | right pulmonary isomerism                                                        | 0.4             |
| ENSG00000197283      | SYNGAP1 PPI subnetwork                                                           | 0.4             |
| GO:0030496           | midbody                                                                          | 0.4             |
| ENSG00000140396      | NCOA2 PPI subnetwork                                                             | 0.4             |
| GO:0017002           | activin-activated receptor activity                                              | 0.4             |
| MP:0002116           | abnormal craniofacial bone morphology                                            | 0.4             |
| GO:0002824           | positive regulation of adaptive immune response based on somatic recombination c | 0.4             |
| GO:0032653           | regulation of interleukin-10 production                                          | 0.4             |
| MP:0001633           | poor circulation                                                                 | 0.4             |
| ENSG000000061676     | NCKAP1 PPI subnetwork                                                            | 0.4             |
| ENSG00000100170      | SLC5A1 PPI subnetwork                                                            | 0.4             |
| GO:0032401           | establishment of melanosome localization                                         | 0.4             |
| MP:0008586           | disorganized photoreceptor outer segment                                         | 0.4             |
| GO:0005099           | Ras GTPase activator activity                                                    | 0.4             |
| ENSG00000162367      | TAL1 PPI subnetwork                                                              | 0.4             |
| GO:0001540           | beta-amyloid binding                                                             | 0.4             |
| GO:0032355           | response to estradiol stimulus                                                   | 0.4             |
| MP:0003674           | oxidative stress                                                                 | 0.4             |
| ENSG00000118785      | SPP1 PPI subnetwork                                                              | 0.4             |
| GO:0035254           | glutamate receptor binding                                                       | 0.4             |
| GO:0006605           | protein targeting                                                                | 0.4             |
| GO:0000795           | synaptonemal complex                                                             | 0.4             |
| MP:0004617           | sacral vertebral transformation                                                  | 0.4             |
| ENSG00000124635      | HIST1H2BJ PPI subnetwork                                                         | 0.4             |
| ENSG00000067048      | DDX3Y PPI subnetwork                                                             | 0.4             |
| ENSG00000152684      | PELO PPI subnetwork                                                              | 0.4             |
| GO:0035383           | thioester metabolic process                                                      | 0.4             |
| GO:0006637           | acyl-CoA metabolic process                                                       | 0.4             |
| MP:0004837           | abnormal neural fold formation                                                   | 0.4             |
| GO:0030057           | desmosome                                                                        | 0.4             |

**Original gene set ID****Original gene set description****Nominal P value**

|                                                          |                                                                             |      |
|----------------------------------------------------------|-----------------------------------------------------------------------------|------|
| ENSG00000196470                                          | SIAH1 PPI subnetwork                                                        | 0.4  |
| ENSG00000133961                                          | NUMB PPI subnetwork                                                         | 0.4  |
| GO:0046873                                               | metal ion transmembrane transporter activity                                | 0.4  |
| MP:0009888                                               | palatal shelves fail to meet at midline                                     | 0.41 |
| ENSG00000186951                                          | PPARA PPI subnetwork                                                        | 0.41 |
| GO:0006509                                               | membrane protein ectodomain proteolysis                                     | 0.41 |
| ENSG00000114030                                          | KPNA1 PPI subnetwork                                                        | 0.41 |
| ENSG00000184588                                          | PDE4B PPI subnetwork                                                        | 0.41 |
| ENSG00000110330                                          | BIRC2 PPI subnetwork                                                        | 0.41 |
| ENSG00000144891                                          | AGTR1 PPI subnetwork                                                        | 0.41 |
| GO:0051216                                               | cartilage development                                                       | 0.41 |
| ENSG00000101343                                          | CRNKL1 PPI subnetwork                                                       | 0.41 |
| MP:0001861                                               | lung inflammation                                                           | 0.41 |
| MP:0010766                                               | abnormal NK cell physiology                                                 | 0.41 |
| MP:0009115                                               | abnormal fat cell morphology                                                | 0.41 |
| ENSG00000166128                                          | RAB8B PPI subnetwork                                                        | 0.41 |
| ENSG00000149925                                          | ALDOA PPI subnetwork                                                        | 0.41 |
| ENSG00000112249                                          | ASCC3 PPI subnetwork                                                        | 0.41 |
| GO:0035267                                               | NuA4 histone acetyltransferase complex                                      | 0.41 |
| GO:0045745                                               | positive regulation of G-protein coupled receptor protein signaling pathway | 0.41 |
| GO:0006476                                               | protein deacetylation                                                       | 0.41 |
| ENSG00000111725                                          | PRKAB1 PPI subnetwork                                                       | 0.41 |
| ENSG00000121031                                          | ENSG00000121031 PPI subnetwork                                              | 0.41 |
| ENSG00000204389                                          | HSPA1A PPI subnetwork                                                       | 0.41 |
| ENSG00000204388                                          | HSPA1B PPI subnetwork                                                       | 0.41 |
| ENSG00000212866                                          | HSPA1B PPI subnetwork                                                       | 0.41 |
| ENSG00000215292                                          | ENSG00000215292 PPI subnetwork                                              | 0.41 |
| ENSG00000212860                                          | ENSG00000212860 PPI subnetwork                                              | 0.41 |
| GO:0048009                                               | insulin-like growth factor receptor signaling pathway                       | 0.41 |
| REACTOME_BASIGIN_INTERACTIONS                            | REACTOME_BASIGIN_INTERACTIONS                                               | 0.41 |
| GO:0005871                                               | kinesin complex                                                             | 0.41 |
| MP:0006072                                               | abnormal retinal apoptosis                                                  | 0.41 |
| ENSG00000131381                                          | ZFYVE20 PPI subnetwork                                                      | 0.41 |
| ENSG00000102606                                          | ARHGEF7 PPI subnetwork                                                      | 0.41 |
| MP:0004174                                               | abnormal spine curvature                                                    | 0.41 |
| GO:0031231                                               | intrinsic to peroxisomal membrane                                           | 0.41 |
| GO:0005779                                               | integral to peroxisomal membrane                                            | 0.41 |
| GO:0008509                                               | anion transmembrane transporter activity                                    | 0.41 |
| GO:0003231                                               | cardiac ventricle development                                               | 0.41 |
| MP:0005282                                               | decreased fatty acid level                                                  | 0.41 |
| ENSG00000134243                                          | SORT1 PPI subnetwork                                                        | 0.41 |
| MP:0006410                                               | abnormal common myeloid progenitor cell morphology                          | 0.41 |
| MP:0003886                                               | abnormal embryonic epiblast morphology                                      | 0.41 |
| GO:0000083                                               | regulation of transcription involved in G1/S phase of mitotic cell cycle    | 0.41 |
| MP:0004509                                               | abnormal pelvic girdle bone morphology                                      | 0.41 |
| ENSG00000131910                                          | NROB2 PPI subnetwork                                                        | 0.41 |
| ENSG00000109971                                          | HSPA8 PPI subnetwork                                                        | 0.41 |
| ENSG00000131236                                          | CAP1 PPI subnetwork                                                         | 0.41 |
| REACTOME_AMINO_ACID_TRANSPORT_ACROSS_THE_PLASMA_MEMBRANE | REACTOME_AMINO_ACID_TRANSPORT_ACROSS_THE_PLASMA_MEMBRANE                    | 0.41 |

| Original gene set ID | Original gene set description                          | Nominal P value |
|----------------------|--------------------------------------------------------|-----------------|
| MP:0005030           | absent amnion                                          | 0.41            |
| GO:0032098           | regulation of appetite                                 | 0.41            |
| ENSG000000183072     | NKX2-5 PPI subnetwork                                  | 0.41            |
| MP:0001469           | abnormal contextual conditioning behavior              | 0.41            |
| ENSG000000140285     | FGF7 PPI subnetwork                                    | 0.41            |
| GO:0005793           | endoplasmic reticulum-Golgi intermediate compartment   | 0.41            |
| ENSG000000196501     | ENSG000000196501 PPI subnetwork                        | 0.41            |
| GO:0072376           | protein activation cascade                             | 0.41            |
| GO:0032461           | positive regulation of protein oligomerization         | 0.41            |
| ENSG000000197597     | ENSG000000197597 PPI subnetwork                        | 0.41            |
| MP:0004981           | decreased neuronal precursor cell number               | 0.41            |
| ENSG000000105229     | PIAS4 PPI subnetwork                                   | 0.41            |
| GO:0002756           | MyD88-independent toll-like receptor signaling pathway | 0.41            |
| GO:0019867           | outer membrane                                         | 0.41            |
| GO:0043113           | receptor clustering                                    | 0.41            |
| MP:0000351           | increased cell proliferation                           | 0.41            |
| GO:0050663           | cytokine secretion                                     | 0.41            |
| ENSG000000103351     | CLUAP1 PPI subnetwork                                  | 0.41            |
| ENSG000000113643     | RARS PPI subnetwork                                    | 0.41            |
| GO:0005768           | endosome                                               | 0.41            |
| GO:0019318           | hexose metabolic process                               | 0.41            |
| MP:0008210           | increased mature B cell number                         | 0.41            |
| GO:0071897           | DNA biosynthetic process                               | 0.41            |
| GO:0016328           | lateral plasma membrane                                | 0.41            |
| ENSG000000174197     | MGA PPI subnetwork                                     | 0.41            |
| ENSG000000170004     | CHD3 PPI subnetwork                                    | 0.41            |
| ENSG000000164045     | CDC25A PPI subnetwork                                  | 0.41            |
| ENSG000000206450     | HLA-B PPI subnetwork                                   | 0.41            |
| ENSG000000174227     | PIGG PPI subnetwork                                    | 0.41            |
| GO:0015758           | glucose transport                                      | 0.41            |
| GO:0008645           | hexose transport                                       | 0.41            |
| ENSG000000111640     | GAPDH PPI subnetwork                                   | 0.41            |
| ENSG000000154229     | PRKCA PPI subnetwork                                   | 0.41            |
| GO:0002761           | regulation of myeloid leukocyte differentiation        | 0.41            |
| ENSG000000072832     | CRMP1 PPI subnetwork                                   | 0.41            |
| MP:0002795           | dilated cardiomyopathy                                 | 0.41            |
| ENSG000000163466     | ARPC2 PPI subnetwork                                   | 0.41            |
| MP:0009746           | enhanced behavioral response to xenobiotic             | 0.41            |
| GO:0048771           | tissue remodeling                                      | 0.41            |
| ENSG000000135341     | MAP3K7 PPI subnetwork                                  | 0.41            |
| ENSG000000108094     | CUL2 PPI subnetwork                                    | 0.41            |
| GO:0009225           | nucleotide-sugar metabolic process                     | 0.41            |
| ENSG000000198899     | MT-ATP6 PPI subnetwork                                 | 0.41            |
| ENSG000000070010     | UFD1L PPI subnetwork                                   | 0.41            |
| ENSG000000143878     | RHOB PPI subnetwork                                    | 0.41            |
| GO:0046930           | pore complex                                           | 0.41            |
| ENSG000000087111     | PIGS PPI subnetwork                                    | 0.41            |
| GO:0000082           | G1/S transition of mitotic cell cycle                  | 0.41            |
| ENSG000000105401     | CDC37 PPI subnetwork                                   | 0.41            |



| Original gene set ID                                          | Original gene set description                                       | Nominal P value |
|---------------------------------------------------------------|---------------------------------------------------------------------|-----------------|
| ENSG00000117020                                               | AKT3 PPI subnetwork                                                 | 0.42            |
| GO:0033344                                                    | cholesterol efflux                                                  | 0.42            |
| ENSG00000153006                                               | SREK1IP1 PPI subnetwork                                             | 0.42            |
| GO:0005774                                                    | vacuolar membrane                                                   | 0.42            |
| MP:0008617                                                    | increased circulating interleukin-12 level                          | 0.42            |
| ENSG00000156711                                               | MAPK13 PPI subnetwork                                               | 0.42            |
| MP:0003871                                                    | abnormal myelin sheath morphology                                   | 0.42            |
| ENSG00000118965                                               | WDR35 PPI subnetwork                                                | 0.42            |
| GO:0005104                                                    | fibroblast growth factor receptor binding                           | 0.42            |
| MP:0001940                                                    | testis hypoplasia                                                   | 0.42            |
| ENSG00000138468                                               | SENP7 PPI subnetwork                                                | 0.42            |
| ENSG00000118640                                               | VAMP8 PPI subnetwork                                                | 0.42            |
| ENSG00000105663                                               | ENSG00000105663 PPI subnetwork                                      | 0.42            |
| MP:0000292                                                    | distended pericardium                                               | 0.42            |
| MP:0001790                                                    | abnormal immune system physiology                                   | 0.42            |
| MP:0001554                                                    | increased circulating free fatty acid leve                          | 0.42            |
| GO:0030099                                                    | myeloid cell differentiation                                        | 0.42            |
| MP:0003633                                                    | abnormal nervous system physiology                                  | 0.42            |
| GO:0016053                                                    | organic acid biosynthetic process                                   | 0.42            |
| GO:0046394                                                    | carboxylic acid biosynthetic process                                | 0.42            |
| MP:0004696                                                    | abnormal thyroid follicle morphology                                | 0.42            |
| ENSG00000100353                                               | EIF3D PPI subnetwork                                                | 0.42            |
| GO:0051153                                                    | regulation of striated muscle cell differentiator                   | 0.42            |
| ENSG00000196611                                               | MMP1 PPI subnetwork                                                 | 0.42            |
| ENSG00000213024                                               | NUP62 PPI subnetwork                                                | 0.42            |
| ENSG00000118007                                               | STAG1 PPI subnetwork                                                | 0.42            |
| ENSG00000106554                                               | CHCHD3 PPI subnetwork                                               | 0.42            |
| ENSG00000080608                                               | KIAA0020 PPI subnetwork                                             | 0.42            |
| GO:0031110                                                    | regulation of microtubule polymerization or depolymerizati          | 0.42            |
| GO:0035384                                                    | thioester biosynthetic process                                      | 0.42            |
| GO:0071616                                                    | acyl-CoA biosynthetic process                                       | 0.42            |
| REACTOME_IRS:RELATED_EVENTS                                   | REACTOME_IRS:RELATED_EVENTS                                         | 0.42            |
| REACTOME_IRS:MEDIATED_SIGNALLING                              | REACTOME_IRS:MEDIATED_SIGNALLING                                    | 0.42            |
| GO:0042559                                                    | pteridine-containing compound biosynthetic process                  | 0.42            |
| REACTOME_METABOLISM_OF_RNA                                    | REACTOME_METABOLISM_OF_RNA                                          | 0.42            |
| GO:0005529                                                    | GO:0005529                                                          | 0.42            |
| ENSG00000089902                                               | RCOR1 PPI subnetwork                                                | 0.42            |
| MP:0009404                                                    | centrally nucleated skeletal muscle fibers                          | 0.42            |
| REACTOME_ASSOCIATION_OF_TRICCT_WITH_TARGET_PROTEINS_DURING_BI | REACTOME_ASSOCIATION_OF_TRICCT_WITH_TARGET_PROTEINS_DURING_BIOSY    | 0.42            |
| ENSG00000146587                                               | RBAK PPI subnetwork                                                 | 0.42            |
| ENSG00000081248                                               | CACNA1S PPI subnetwork                                              | 0.42            |
| ENSG00000007402                                               | CACNA2D2 PPI subnetwork                                             | 0.42            |
| MP:0000822                                                    | abnormal brain ventricle morphology                                 | 0.42            |
| GO:0045776                                                    | negative regulation of blood pressure                               | 0.42            |
| GO:0009266                                                    | response to temperature stimulus                                    | 0.42            |
| GO:0006940                                                    | regulation of smooth muscle contraction                             | 0.42            |
| GO:0031111                                                    | negative regulation of microtubule polymerization or depolymerizati | 0.42            |
| MP:0002118                                                    | abnormal lipid homeostasis                                          | 0.42            |
| ENSG00000177565                                               | TBL1XR1 PPI subnetwork                                              | 0.42            |

| Original gene set ID                                | Original gene set description                       | Nominal P value |
|-----------------------------------------------------|-----------------------------------------------------|-----------------|
| ENSG00000182944                                     | EWSR1 PPI subnetwork                                | 0.42            |
| ENSG00000173349                                     | SFT2D3 PPI subnetwork                               | 0.42            |
| GO:0034694                                          | response to prostaglandin stimulus                  | 0.42            |
| ENSG00000090776                                     | EFNB1 PPI subnetwork                                | 0.42            |
| ENSG00000102010                                     | BMX PPI subnetwork                                  | 0.42            |
| ENSG00000100385                                     | IL2RB PPI subnetwork                                | 0.42            |
| GO:0006626                                          | protein targeting to mitochondrion                  | 0.42            |
| ENSG00000138297                                     | TIMM23 PPI subnetwork                               | 0.42            |
| ENSG00000172399                                     | MYOZ2 PPI subnetwork                                | 0.42            |
| GO:0051318                                          | G1 phase                                            | 0.42            |
| GO:0016229                                          | steroid dehydrogenase activity                      | 0.42            |
| ENSG00000108651                                     | UTP6 PPI subnetwork                                 | 0.42            |
| MP:0000740                                          | impaired smooth muscle contractility                | 0.42            |
| MP:0000477                                          | abnormal intestine morphology                       | 0.42            |
| MP:0000222                                          | decreased neutrophil cell number                    | 0.42            |
| ENSG00000164167                                     | LSM6 PPI subnetwork                                 | 0.42            |
| REACTOME_SIGNALING_BY_ERBB4                         | REACTOME_SIGNALING_BY_ERBB4                         | 0.42            |
| MP:0000088                                          | short mandible                                      | 0.42            |
| ENSG00000136628                                     | EPRS PPI subnetwork                                 | 0.42            |
| ENSG00000164171                                     | ITGA2 PPI subnetwork                                | 0.42            |
| ENSG00000182809                                     | CRIP2 PPI subnetwork                                | 0.42            |
| ENSG00000149091                                     | DGKZ PPI subnetwork                                 | 0.42            |
| GO:0032787                                          | monocarboxylic acid metabolic process               | 0.42            |
| GO:0003684                                          | damaged DNA binding                                 | 0.42            |
| REACTOME_PROCESSIVE_SYNTHESIS_ON_THE_LAGGING_STRAND | REACTOME_PROCESSIVE_SYNTHESIS_ON_THE_LAGGING_STRAND | 0.42            |
| GO:0030660                                          | Golgi-associated vesicle membrane                   | 0.42            |
| REACTOME_RECYCLING_OF_BILE_ACIDS_AND_SALTS          | REACTOME_RECYCLING_OF_BILE_ACIDS_AND_SALTS          | 0.42            |
| ENSG00000196712                                     | NF1 PPI subnetwork                                  | 0.42            |
| GO:0007260                                          | tyrosine phosphorylation of STAT protein            | 0.42            |
| ENSG00000160094                                     | ZNF362 PPI subnetwork                               | 0.42            |
| GO:0007517                                          | muscle organ development                            | 0.42            |
| GO:0035094                                          | response to nicotine                                | 0.42            |
| ENSG00000131508                                     | UBE2D2 PPI subnetwork                               | 0.42            |
| GO:0017075                                          | syntaxin-1 binding                                  | 0.42            |
| ENSG00000166889                                     | PATL1 PPI subnetwork                                | 0.42            |
| ENSG00000163554                                     | SPTA1 PPI subnetwork                                | 0.43            |
| MP:0001327                                          | decreased retinal photoreceptor cell number         | 0.43            |
| GO:0001047                                          | core promoter binding                               | 0.43            |
| GO:0000086                                          | G2/M transition of mitotic cell cycle               | 0.43            |
| ENSG00000127955                                     | GNAI1 PPI subnetwork                                | 0.43            |
| ENSG00000078900                                     | TP73 PPI subnetwork                                 | 0.43            |
| GO:0035601                                          | protein deacylation                                 | 0.43            |
| REACTOME_INTRINSIC_PATHWAY                          | REACTOME_INTRINSIC_PATHWAY                          | 0.43            |
| GO:0035329                                          | hippo signaling cascade                             | 0.43            |
| GO:0034134                                          | toll-like receptor 2 signaling pathway              | 0.43            |
| MP:0003122                                          | maternal imprinting                                 | 0.43            |
| GO:0006338                                          | chromatin remodeling                                | 0.43            |
| GO:0060443                                          | mammary gland morphogenesis                         | 0.43            |
| ENSG00000100485                                     | SOS2 PPI subnetwork                                 | 0.43            |



| <b>Original gene set ID</b>                               | <b>Original gene set description</b>                                               | <b>Nominal P value</b> |
|-----------------------------------------------------------|------------------------------------------------------------------------------------|------------------------|
| GO:0005540                                                | hyaluronic acid binding                                                            | 0.43                   |
| MP:0004678                                                | split xiphoid process                                                              | 0.43                   |
| REACTOME_GENERIC_TRANSCRIPTION_PATHWAY                    | REACTOME_GENERIC_TRANSCRIPTION_PATHWAY                                             | 0.43                   |
| GO:0008214                                                | protein dealkylation                                                               | 0.43                   |
| GO:0006482                                                | protein demethylation                                                              | 0.43                   |
| GO:0010565                                                | regulation of cellular ketone metabolic process                                    | 0.43                   |
| ENSG00000148143                                           | ZNF462 PPI subnetwork                                                              | 0.43                   |
| GO:0051310                                                | metaphase plate congression                                                        | 0.43                   |
| ENSG00000184985                                           | SORCS2 PPI subnetwork                                                              | 0.43                   |
| MP:0000428                                                | abnormal craniofacial morphology                                                   | 0.43                   |
| ENSG00000123975                                           | CKS2 PPI subnetwork                                                                | 0.43                   |
| ENSG00000156136                                           | DCK PPI subnetwork                                                                 | 0.43                   |
| ENSG00000160200                                           | CBS PPI subnetwork                                                                 | 0.43                   |
| REACTOME_PI:3K_CASCADE                                    | REACTOME_PI:3K_CASCADE                                                             | 0.43                   |
| MP:0002412                                                | increased susceptibility to bacterial infectior                                    | 0.43                   |
| GO:0090100                                                | positive regulation of transmembrane receptor protein serine/threonine kinase sign | 0.43                   |
| ENSG00000066044                                           | ELAVL1 PPI subnetwork                                                              | 0.43                   |
| ENSG00000104689                                           | TNFRSF10A PPI subnetwork                                                           | 0.43                   |
| ENSG00000112237                                           | CCNC PPI subnetwork                                                                | 0.43                   |
| ENSG00000197943                                           | PLCG2 PPI subnetwork                                                               | 0.43                   |
| REACTOME_DOWNSTREAM_SIGNALING_OF_ACTIVATED_FGFR           | REACTOME_DOWNSTREAM_SIGNALING_OF_ACTIVATED_FGFR                                    | 0.43                   |
| ENSG00000043591                                           | ADRB1 PPI subnetwork                                                               | 0.43                   |
| REACTOME_GENERATION_OF_SECOND_MESSENGER_MOLECULES         | REACTOME_GENERATION_OF_SECOND_MESSENGER_MOLECULES                                  | 0.43                   |
| REACTOME_INFLUENZA_LIFE_CYCLE                             | REACTOME_INFLUENZA_LIFE_CYCLE                                                      | 0.43                   |
| GO:0016763                                                | transferase activity, transferring pentosyl groups                                 | 0.43                   |
| GO:0014812                                                | muscle cell migration                                                              | 0.43                   |
| ENSG00000124782                                           | RREB1 PPI subnetwork                                                               | 0.43                   |
| ENSG00000113356                                           | POLR3G PPI subnetwork                                                              | 0.43                   |
| MP:0001395                                                | bidirectional circling                                                             | 0.43                   |
| GO:0002718                                                | regulation of cytokine production involved in immune response                      | 0.43                   |
| REACTOME_NEGATIVE_REGULATION_OF_FGFR_SIGNALING            | REACTOME_NEGATIVE_REGULATION_OF_FGFR_SIGNALING                                     | 0.43                   |
| ENSG00000106105                                           | GARS PPI subnetwork                                                                | 0.43                   |
| GO:0001522                                                | pseudouridine synthesis                                                            | 0.43                   |
| ENSG00000129315                                           | CCNT1 PPI subnetwork                                                               | 0.43                   |
| GO:0002250                                                | adaptive immune response                                                           | 0.43                   |
| REACTOME_PI3K_CASCADE                                     | REACTOME_PI3K_CASCADE                                                              | 0.43                   |
| GO:0030141                                                | secretory granule                                                                  | 0.43                   |
| MP:0003139                                                | patent ductus arteriosus                                                           | 0.43                   |
| ENSG00000100387                                           | RBX1 PPI subnetwork                                                                | 0.43                   |
| GO:0007213                                                | G-protein coupled acetylcholine receptor signaling pathway                         | 0.43                   |
| ENSG00000145220                                           | LYAR PPI subnetwork                                                                | 0.43                   |
| GO:0030665                                                | clathrin coated vesicle membrane                                                   | 0.43                   |
| MP:0006395                                                | abnormal epiphyseal plate morphology                                               | 0.43                   |
| KEGG_GLYCOSYLPHOSPHATIDYLINOSITOL_GPI_ANCHOR_BIOSYNTHESIS | KEGG_GLYCOSYLPHOSPHATIDYLINOSITOL_GPI_ANCHOR_BIOSYNTHESIS                          | 0.43                   |
| ENSG00000142166                                           | IFNAR1 PPI subnetwork                                                              | 0.43                   |
| ENSG00000130826                                           | DKC1 PPI subnetwork                                                                | 0.43                   |
| GO:0004197                                                | cysteine-type endopeptidase activity                                               | 0.43                   |
| ENSG00000124217                                           | MOCS3 PPI subnetwork                                                               | 0.43                   |
| GO:0022612                                                | gland morphogenesis                                                                | 0.43                   |

**Original gene set ID****Original gene set description****Nominal P value**

|                                                     |                                                                                                           |      |
|-----------------------------------------------------|-----------------------------------------------------------------------------------------------------------|------|
| MP:0000157                                          | abnormal sternum morphology                                                                               | 0.43 |
| ENSG00000173473                                     | SMARCC1 PPI subnetwork                                                                                    | 0.43 |
| MP:0000837                                          | abnormal hypothalamus morphology                                                                          | 0.43 |
| MP:0011094                                          | complete embryonic lethality before implantation                                                          | 0.43 |
| MP:0001614                                          | abnormal blood vessel morphology                                                                          | 0.43 |
| ENSG00000117385                                     | LEPRE1 PPI subnetwork                                                                                     | 0.43 |
| MP:0003725                                          | increased autoantibody level                                                                              | 0.43 |
| ENSG00000109320                                     | NFKB1 PPI subnetwork                                                                                      | 0.43 |
| GO:0002407                                          | dendritic cell chemotaxis                                                                                 | 0.43 |
| ENSG00000105220                                     | GPI PPI subnetwork                                                                                        | 0.43 |
| MP:0010872                                          | increased trabecular bone mass                                                                            | 0.43 |
| MP:0008682                                          | decreased interleukin-17 secretion                                                                        | 0.43 |
| MP:0005606                                          | increased bleeding time                                                                                   | 0.43 |
| GO:0045839                                          | negative regulation of mitosis                                                                            | 0.43 |
| GO:0051784                                          | negative regulation of nuclear division                                                                   | 0.43 |
| MP:0000136                                          | abnormal microglial cell morphology                                                                       | 0.43 |
| GO:2000311                                          | regulation of alpha-amino-3-hydroxy-5-methyl-4-isoxazole propionate selective glutamate receptor activity | 0.43 |
| MP:0001312                                          | abnormal cornea morphology                                                                                | 0.43 |
| ENSG00000113312                                     | TTC1 PPI subnetwork                                                                                       | 0.43 |
| GO:0034329                                          | cell junction assembly                                                                                    | 0.43 |
| GO:0070307                                          | lens fiber cell development                                                                               | 0.43 |
| ENSG00000099331                                     | MYO9B PPI subnetwork                                                                                      | 0.43 |
| GO:0060076                                          | excitatory synapse                                                                                        | 0.43 |
| ENSG00000181929                                     | PRKAG1 PPI subnetwork                                                                                     | 0.43 |
| ENSG00000197961                                     | ZNF121 PPI subnetwork                                                                                     | 0.43 |
| ENSG00000137876                                     | RSL24D1 PPI subnetwork                                                                                    | 0.43 |
| GO:0016782                                          | transferase activity, transferring sulfur-containing groups                                               | 0.43 |
| MP:0002631                                          | abnormal epididymis morphology                                                                            | 0.43 |
| GO:0046006                                          | regulation of activated T cell proliferation                                                              | 0.43 |
| MP:0004076                                          | abnormal vitelline vascular remodeling                                                                    | 0.43 |
| MP:0001800                                          | abnormal humoral immune response                                                                          | 0.43 |
| ENSG00000182367                                     | ENSG00000182367 PPI subnetwork                                                                            | 0.43 |
| MP:0003048                                          | abnormal cervical vertebrae morphology                                                                    | 0.43 |
| ENSG00000143498                                     | TAF1A PPI subnetwork                                                                                      | 0.43 |
| MP:0000685                                          | abnormal immune system morphology                                                                         | 0.43 |
| MP:0005011                                          | increased eosinophil cell number                                                                          | 0.43 |
| GO:0009152                                          | purine ribonucleotide biosynthetic process                                                                | 0.43 |
| GO:0007264                                          | small GTPase mediated signal transduction                                                                 | 0.43 |
| REACTOME_RNA_POLYMERASE_I_TRANSCRIPTION_TERMINATION | REACTOME_RNA_POLYMERASE_I_TRANSCRIPTION_TERMINATION                                                       | 0.43 |
| ENSG00000134255                                     | CEPT1 PPI subnetwork                                                                                      | 0.43 |
| ENSG00000197616                                     | MYH6 PPI subnetwork                                                                                       | 0.43 |
| ENSG00000139613                                     | SMARCC2 PPI subnetwork                                                                                    | 0.43 |
| GO:0045028                                          | G-protein coupled purinergic nucleotide receptor activity                                                 | 0.43 |
| GO:0001608                                          | G-protein coupled nucleotide receptor activity                                                            | 0.43 |
| ENSG00000186153                                     | WWOX PPI subnetwork                                                                                       | 0.43 |
| ENSG00000155111                                     | CDK19 PPI subnetwork                                                                                      | 0.43 |
| ENSG00000163635                                     | ATXN7 PPI subnetwork                                                                                      | 0.43 |
| ENSG00000154767                                     | XPC PPI subnetwork                                                                                        | 0.43 |
| MP:0010019                                          | liver vascular congestion                                                                                 | 0.43 |

| Original gene set ID            | Original gene set description                                    | Nominal P value |
|---------------------------------|------------------------------------------------------------------|-----------------|
| GO:0050673                      | epithelial cell proliferation                                    | 0.43            |
| MP:0002574                      | increased vertical activity                                      | 0.43            |
| MP:0005421                      | loose skin                                                       | 0.43            |
| GO:0048638                      | regulation of developmental growth                               | 0.43            |
| GO:0009116                      | nucleoside metabolic process                                     | 0.43            |
| GO:0032970                      | regulation of actin filament-based process                       | 0.43            |
| ENSG00000154764                 | WNT7A PPI subnetwork                                             | 0.43            |
| ENSG00000105855                 | ITGB8 PPI subnetwork                                             | 0.43            |
| ENSG00000070423                 | RNF126 PPI subnetwork                                            | 0.43            |
| ENSG00000124588                 | NQO2 PPI subnetwork                                              | 0.43            |
| GO:0005161                      | platelet-derived growth factor receptor binding                  | 0.44            |
| ENSG00000076604                 | TRAF4 PPI subnetwork                                             | 0.44            |
| MP:0003718                      | maternal effect                                                  | 0.44            |
| ENSG00000065485                 | PDIA5 PPI subnetwork                                             | 0.44            |
| ENSG00000065135                 | GNAI3 PPI subnetwork                                             | 0.44            |
| ENSG00000100227                 | POLDIP3 PPI subnetwork                                           | 0.44            |
| MP:0005353                      | abnormal patella morphology                                      | 0.44            |
| MP:0008501                      | increased IgG2b level                                            | 0.44            |
| MP:0004029                      | spontaneous chromosome breakage                                  | 0.44            |
| GO:0032613                      | interleukin-10 production                                        | 0.44            |
| MP:0000182                      | increased circulating LDL cholesterol leve                       | 0.44            |
| MP:0004783                      | abnormal cardinal vein morphology                                | 0.44            |
| GO:0001518                      | voltage-gated sodium channel complex                             | 0.44            |
| ENSG00000165030                 | NFIL3 PPI subnetwork                                             | 0.44            |
| KEGG_P53_SIGNALING_PATHWAY      | KEGG_P53_SIGNALING_PATHWAY                                       | 0.44            |
| MP:0005463                      | abnormal CD4-positive T cell physiology                          | 0.44            |
| GO:0048738                      | cardiac muscle tissue development                                | 0.44            |
| GO:0032869                      | cellular response to insulin stimulus                            | 0.44            |
| ENSG00000105695                 | MAG PPI subnetwork                                               | 0.44            |
| GO:0048246                      | macrophage chemotaxis                                            | 0.44            |
| GO:0040008                      | regulation of growth                                             | 0.44            |
| ENSG00000171346                 | KRT15 PPI subnetwork                                             | 0.44            |
| GO:0000070                      | mitotic sister chromatid segregation                             | 0.44            |
| GO:0042129                      | regulation of T cell proliferation                               | 0.44            |
| MP:0008593                      | increased circulating interleukin-10 level                       | 0.44            |
| GO:0002478                      | antigen processing and presentation of exogenous peptide antigen | 0.44            |
| ENSG00000204642                 | HLA-F PPI subnetwork                                             | 0.44            |
| MP:0000030                      | abnormal tympanic ring morphology                                | 0.44            |
| ENSG00000104312                 | RIPK2 PPI subnetwork                                             | 0.44            |
| ENSG00000035928                 | RFC1 PPI subnetwork                                              | 0.44            |
| KEGG_GLYCOLYSIS_GLUCONEOGENESIS | KEGG_GLYCOLYSIS_GLUCONEOGENESIS                                  | 0.44            |
| ENSG00000132432                 | SEC61G PPI subnetwork                                            | 0.44            |
| GO:0043484                      | regulation of RNA splicing                                       | 0.44            |
| ENSG00000002745                 | WNT16 PPI subnetwork                                             | 0.44            |
| MP:0006043                      | decreased apoptosis                                              | 0.44            |
| ENSG00000144580                 | RQCD1 PPI subnetwork                                             | 0.44            |
| ENSG00000116251                 | RPL22 PPI subnetwork                                             | 0.44            |
| MP:0003131                      | increased erythrocyte cell number                                | 0.44            |
| MP:0004703                      | abnormal vertebral column morphology                             | 0.44            |



| Original gene set ID | Original gene set description                                                        | Nominal P value |
|----------------------|--------------------------------------------------------------------------------------|-----------------|
| KEGG_GLIOMA          | KEGG_GLIOMA                                                                          | 0.44            |
| GO:0048471           | perinuclear region of cytoplasm                                                      | 0.44            |
| GO:0051494           | negative regulation of cytoskeleton organization                                     | 0.44            |
| GO:0070925           | organelle assembly                                                                   | 0.44            |
| ENSG00000137218      | FRS3 PPI subnetwork                                                                  | 0.44            |
| GO:0017069           | snRNA binding                                                                        | 0.44            |
| MP:0000688           | lymphoid hyperplasia                                                                 | 0.44            |
| ENSG00000171634      | BPTF PPI subnetwork                                                                  | 0.44            |
| GO:0017015           | regulation of transforming growth factor beta receptor signaling pathway             | 0.44            |
| GO:0004714           | transmembrane receptor protein tyrosine kinase activity                              | 0.44            |
| ENSG00000120889      | TNFRSF10B PPI subnetwork                                                             | 0.44            |
| ENSG00000196975      | ANXA4 PPI subnetwork                                                                 | 0.44            |
| ENSG00000121858      | TNFSF10 PPI subnetwork                                                               | 0.44            |
| GO:0002449           | lymphocyte mediated immunity                                                         | 0.44            |
| GO:0005212           | structural constituent of eye lens                                                   | 0.44            |
| GO:0048745           | smooth muscle tissue development                                                     | 0.44            |
| GO:0022613           | ribonucleoprotein complex biogenesis                                                 | 0.44            |
| MP:0010373           | myeloid hyperplasia                                                                  | 0.44            |
| MP:0000036           | absent semicircular canals                                                           | 0.44            |
| ENSG00000132485      | ZRANB2 PPI subnetwork                                                                | 0.44            |
| ENSG00000106123      | EPHB6 PPI subnetwork                                                                 | 0.44            |
| GO:0042254           | ribosome biogenesis                                                                  | 0.44            |
| MP:0005102           | abnormal iris pigmentation                                                           | 0.44            |
| ENSG00000206156      | ENSG00000206156 PPI subnetwork                                                       | 0.44            |
| ENSG00000105372      | RPS19 PPI subnetwork                                                                 | 0.44            |
| MP:0005140           | decreased cardiac muscle contractility                                               | 0.44            |
| ENSG00000081019      | RSBN1 PPI subnetwork                                                                 | 0.44            |
| ENSG00000101439      | CST3 PPI subnetwork                                                                  | 0.44            |
| MP:0008186           | increased pro-B cell number                                                          | 0.44            |
| GO:0032400           | melanosome localization                                                              | 0.44            |
| ENSG00000154143      | PANX3 PPI subnetwork                                                                 | 0.44            |
| GO:0046902           | regulation of mitochondrial membrane permeability                                    | 0.44            |
| GO:0000159           | protein phosphatase type 2A complex                                                  | 0.44            |
| MP:0005154           | increased B cell proliferation                                                       | 0.44            |
| GO:0016705           | oxidoreductase activity, acting on paired donors, with incorporation or reduction of | 0.44            |
| MP:0001384           | abnormal pup retrieval                                                               | 0.44            |
| GO:0014047           | glutamate secretion                                                                  | 0.44            |
| MP:0001939           | secondary sex reversal                                                               | 0.44            |
| GO:0016641           | oxidoreductase activity, acting on the CH-NH2 group of donors, oxygen as acceptor    | 0.45            |
| MP:0001273           | decreased metastatic potential                                                       | 0.45            |
| ENSG00000071655      | MBD3 PPI subnetwork                                                                  | 0.45            |
| ENSG00000136854      | STXBP1 PPI subnetwork                                                                | 0.45            |
| ENSG00000172071      | EIF2AK3 PPI subnetwork                                                               | 0.45            |
| ENSG00000160563      | MED27 PPI subnetwork                                                                 | 0.45            |
| ENSG00000080802      | CNOT4 PPI subnetwork                                                                 | 0.45            |
| ENSG00000078018      | MAP2 PPI subnetwork                                                                  | 0.45            |
| GO:0007005           | mitochondrion organization                                                           | 0.45            |
| ENSG00000100726      | TELO2 PPI subnetwork                                                                 | 0.45            |
| ENSG00000182541      | LIMK2 PPI subnetwork                                                                 | 0.45            |

| Original gene set ID                                              | Original gene set description                                                    | Nominal P value |
|-------------------------------------------------------------------|----------------------------------------------------------------------------------|-----------------|
| GO:0070412                                                        | R-SMAD binding                                                                   | 0.45            |
| ENSG00000188739                                                   | RBM34 PPI subnetwork                                                             | 0.45            |
| GO:0035176                                                        | social behavior                                                                  | 0.45            |
| ENSG00000144597                                                   | EAF1 PPI subnetwork                                                              | 0.45            |
| GO:0042987                                                        | amyloid precursor protein catabolic process                                      | 0.45            |
| ENSG00000196226                                                   | HIST1H2BB PPI subnetwork                                                         | 0.45            |
| ENSG00000150907                                                   | FOXO1 PPI subnetwork                                                             | 0.45            |
| ENSG00000147536                                                   | GIN54 PPI subnetwork                                                             | 0.45            |
| REACTOME_ANTIGEN_PRESENTATION_FOLDING_ASSEMBLY_AND_PEPTIDE_LOADII | REACTOME_ANTIGEN_PRESENTATION_FOLDING_ASSEMBLY_AND_PEPTIDE_LOADII                | 0.45            |
| ENSG00000117335                                                   | CD46 PPI subnetwork                                                              | 0.45            |
| ENSG00000135018                                                   | UBQLN1 PPI subnetwork                                                            | 0.45            |
| GO:0032956                                                        | regulation of actin cytoskeleton organization                                    | 0.45            |
| MP:0001634                                                        | internal hemorrhage                                                              | 0.45            |
| ENSG00000124813                                                   | RUNX2 PPI subnetwork                                                             | 0.45            |
| GO:0043025                                                        | neuronal cell body                                                               | 0.45            |
| ENSG00000104332                                                   | SFRP1 PPI subnetwork                                                             | 0.45            |
| ENSG00000120057                                                   | SFRP5 PPI subnetwork                                                             | 0.45            |
| ENSG00000106483                                                   | SFRP4 PPI subnetwork                                                             | 0.45            |
| REACTOME_PHOSPHOLIPASE_C:MEDIATED_CASCADE                         | REACTOME_PHOSPHOLIPASE_C:MEDIATED_CASCADE                                        | 0.45            |
| MP:0003360                                                        | abnormal depression-related behavior                                             | 0.45            |
| GO:0060363                                                        | cranial suture morphogenesis                                                     | 0.45            |
| GO:0097094                                                        | craniofacial suture morphogenesis                                                | 0.45            |
| GO:0043367                                                        | CD4-positive, alpha-beta T cell differentiation                                  | 0.45            |
| GO:0000982                                                        | RNA polymerase II core promoter proximal region sequence-specific DNA binding tr | 0.45            |
| MP:0001719                                                        | absent vitelline blood vessels                                                   | 0.45            |
| GO:0016725                                                        | oxidoreductase activity, acting on CH or CH2 groups                              | 0.45            |
| ENSG00000145555                                                   | MYO10 PPI subnetwork                                                             | 0.45            |
| KEGG_ONE_CARBON_POOL_BY_FOLATE                                    | KEGG_ONE_CARBON_POOL_BY_FOLATE                                                   | 0.45            |
| MP:0005410                                                        | abnormal fertilization                                                           | 0.45            |
| GO:0016746                                                        | transferase activity, transferring acyl groups                                   | 0.45            |
| ENSG00000178982                                                   | EIF3K PPI subnetwork                                                             | 0.45            |
| GO:0016311                                                        | dephosphorylation                                                                | 0.45            |
| GO:0046112                                                        | nucleobase biosynthetic process                                                  | 0.45            |
| ENSG00000153187                                                   | HNRNPU PPI subnetwork                                                            | 0.45            |
| ENSG00000014138                                                   | POLA2 PPI subnetwork                                                             | 0.45            |
| ENSG00000112739                                                   | PRPF4B PPI subnetwork                                                            | 0.45            |
| ENSG00000132849                                                   | INADL PPI subnetwork                                                             | 0.45            |
| MP:0008560                                                        | increased tumor necrosis factor secretion                                        | 0.45            |
| ENSG00000068976                                                   | PYGM PPI subnetwork                                                              | 0.45            |
| MP:0002928                                                        | abnormal bile duct morphology                                                    | 0.45            |
| GO:0031253                                                        | cell projection membrane                                                         | 0.45            |
| GO:0007163                                                        | establishment or maintenance of cell polarity                                    | 0.45            |
| ENSG00000117528                                                   | ABCD3 PPI subnetwork                                                             | 0.45            |
| MP:0000603                                                        | pale liver                                                                       | 0.45            |
| MP:0003944                                                        | abnormal T cell subpopulation ratio                                              | 0.45            |
| MP:0002458                                                        | abnormal B cell number                                                           | 0.45            |
| ENSG00000214026                                                   | MRPL23 PPI subnetwork                                                            | 0.45            |
| ENSG00000156603                                                   | MED19 PPI subnetwork                                                             | 0.45            |
| GO:0007605                                                        | sensory perception of sound                                                      | 0.45            |

| Original gene set ID                                          | Original gene set description                                    | Nominal P value |
|---------------------------------------------------------------|------------------------------------------------------------------|-----------------|
| ENSG00000178105                                               | DDX10 PPI subnetwork                                             | 0.45            |
| ENSG00000156931                                               | VPS8 PPI subnetwork                                              | 0.45            |
| ENSG00000141985                                               | SH3GL1 PPI subnetwork                                            | 0.45            |
| ENSG00000108819                                               | ENSG00000108819 PPI subnetwork                                   | 0.45            |
| GO:0070306                                                    | lens fiber cell differentiation                                  | 0.45            |
| ENSG00000102144                                               | PGK1 PPI subnetwork                                              | 0.45            |
| GO:0006958                                                    | complement activation, classical pathway                         | 0.45            |
| REACTOME_LOSS_OF_PROTEINS_REQUIRED_FOR_INTERPHASE_MICROTUBULE | REACTOME_LOSS_OF_PROTEINS_REQUIRED_FOR_INTERPHASE_MICROTUBULE_OR | 0.45            |
| REACTOME_LOSS_OF_NLP_FROM_MITOTIC_CENTROSOMES                 | REACTOME_LOSS_OF_NLP_FROM_MITOTIC_CENTROSOMES                    | 0.45            |
| GO:0032663                                                    | regulation of interleukin-2 production                           | 0.45            |
| GO:0035258                                                    | steroid hormone receptor binding                                 | 0.45            |
| GO:0030178                                                    | negative regulation of Wnt receptor signaling pathway            | 0.45            |
| ENSG00000166710                                               | B2M PPI subnetwork                                               | 0.45            |
| GO:0042058                                                    | regulation of epidermal growth factor receptor signaling pathway | 0.45            |
| GO:0031968                                                    | organelle outer membrane                                         | 0.45            |
| ENSG00000071051                                               | NCK2 PPI subnetwork                                              | 0.45            |
| ENSG00000163516                                               | ANKZF1 PPI subnetwork                                            | 0.45            |
| REACTOME_GAP_JUNCTION_TRAFFICKING                             | REACTOME_GAP_JUNCTION_TRAFFICKING                                | 0.45            |
| ENSG00000136044                                               | APPL2 PPI subnetwork                                             | 0.45            |
| ENSG00000125868                                               | DSTN PPI subnetwork                                              | 0.45            |
| ENSG00000095564                                               | BTAF1 PPI subnetwork                                             | 0.45            |
| ENSG00000196890                                               | HIST3H2BB PPI subnetwork                                         | 0.45            |
| GO:0000793                                                    | condensed chromosome                                             | 0.45            |
| ENSG00000101442                                               | ACTR5 PPI subnetwork                                             | 0.45            |
| MP:0000753                                                    | paralysis                                                        | 0.45            |
| MP:0006020                                                    | decreased tympanic ring size                                     | 0.45            |
| GO:0006760                                                    | folic acid-containing compound metabolic process                 | 0.45            |
| ENSG00000165632                                               | TAF3 PPI subnetwork                                              | 0.45            |
| GO:0048844                                                    | artery morphogenesis                                             | 0.45            |
| ENSG00000128739                                               | SNRPN PPI subnetwork                                             | 0.45            |
| GO:0006664                                                    | glycolipid metabolic process                                     | 0.45            |
| GO:0043209                                                    | myelin sheath                                                    | 0.45            |
| ENSG00000087191                                               | PSMC5 PPI subnetwork                                             | 0.45            |
| ENSG00000175536                                               | LIPT2 PPI subnetwork                                             | 0.45            |
| GO:0014704                                                    | intercalated disc                                                | 0.45            |
| ENSG00000106682                                               | EIF4H PPI subnetwork                                             | 0.45            |
| GO:0002889                                                    | regulation of immunoglobulin mediated immune response            | 0.45            |
| GO:0042104                                                    | positive regulation of activated T cell proliferator             | 0.45            |
| ENSG00000148377                                               | ID12 PPI subnetwork                                              | 0.45            |
| GO:0043094                                                    | cellular metabolic compound salvage                              | 0.45            |
| ENSG00000196220                                               | SRGAP3 PPI subnetwork                                            | 0.45            |
| MP:0008518                                                    | retinal outer nuclear layer degeneration                         | 0.45            |
| ENSG00000116957                                               | TBCE PPI subnetwork                                              | 0.45            |
| MP:0000163                                                    | abnormal cartilage morphology                                    | 0.45            |
| ENSG00000184009                                               | ACTG1 PPI subnetwork                                             | 0.45            |
| ENSG00000169032                                               | MAP2K1 PPI subnetwork                                            | 0.45            |
| GO:0008156                                                    | negative regulation of DNA replication                           | 0.45            |
| GO:0044433                                                    | cytoplasmic vesicle part                                         | 0.45            |
| MP:0006058                                                    | decreased cerebral infarction size                               | 0.45            |

| Original gene set ID                   | Original gene set description                                          | Nominal P value |
|----------------------------------------|------------------------------------------------------------------------|-----------------|
| ENSG00000172053                        | QARS PPI subnetwork                                                    | 0.45            |
| GO:0000959                             | mitochondrial RNA metabolic process                                    | 0.45            |
| GO:0045598                             | regulation of fat cell differentiation                                 | 0.45            |
| MP:0008474                             | absent spleen germinal center                                          | 0.45            |
| MP:0008143                             | abnormal dendrite morphology                                           | 0.45            |
| ENSG00000100784                        | RPS6KA5 PPI subnetwork                                                 | 0.45            |
| ENSG00000126005                        | ENSG00000126005 PPI subnetwork                                         | 0.45            |
| ENSG00000069974                        | RAB27A PPI subnetwork                                                  | 0.45            |
| ENSG00000111669                        | TPI1 PPI subnetwork                                                    | 0.45            |
| KEGG_AMYOTROPHIC_LATERAL_SCLEROSIS_ALS | KEGG_AMYOTROPHIC_LATERAL_SCLEROSIS_ALS                                 | 0.45            |
| MP:0009887                             | abnormal palatal shelf fusion at midline                               | 0.45            |
| GO:0001669                             | acrosomal vesicle                                                      | 0.45            |
| ENSG00000134460                        | IL2RA PPI subnetwork                                                   | 0.45            |
| ENSG00000166033                        | HTRA1 PPI subnetwork                                                   | 0.45            |
| REACTOME_CHROMOSOME_MAINTENANCE        | REACTOME_CHROMOSOME_MAINTENANCE                                        | 0.46            |
| ENSG00000099250                        | NRP1 PPI subnetwork                                                    | 0.46            |
| MP:0000926                             | absent floor plate                                                     | 0.46            |
| ENSG00000182866                        | LCK PPI subnetwork                                                     | 0.46            |
| ENSG00000155380                        | SLC16A1 PPI subnetwork                                                 | 0.46            |
| GO:0048524                             | positive regulation of viral reproduction                              | 0.46            |
| ENSG00000168066                        | SF1 PPI subnetwork                                                     | 0.46            |
| ENSG00000076864                        | RAP1GAP PPI subnetwork                                                 | 0.46            |
| MP:0001718                             | abnormal visceral yolk sac morphology                                  | 0.46            |
| GO:0006363                             | termination of RNA polymerase I transcription                          | 0.46            |
| ENSG00000198612                        | COPS8 PPI subnetwork                                                   | 0.46            |
| MP:0001303                             | abnormal lens morphology                                               | 0.46            |
| GO:0004497                             | monooxygenase activity                                                 | 0.46            |
| ENSG00000125484                        | GTF3C4 PPI subnetwork                                                  | 0.46            |
| ENSG00000197971                        | MBP PPI subnetwork                                                     | 0.46            |
| GO:0004519                             | endonuclease activity                                                  | 0.46            |
| ENSG00000105176                        | URI1 PPI subnetwork                                                    | 0.46            |
| GO:0004722                             | protein serine/threonine phosphatase activity                          | 0.46            |
| ENSG00000128833                        | MYO5C PPI subnetwork                                                   | 0.46            |
| GO:0005819                             | spindle                                                                | 0.46            |
| ENSG00000196540                        | ENSG00000196540 PPI subnetwork                                         | 0.46            |
| GO:0017127                             | cholesterol transporter activity                                       | 0.46            |
| GO:0035710                             | CD4-positive, alpha-beta T cell activation                             | 0.46            |
| GO:0042542                             | response to hydrogen peroxide                                          | 0.46            |
| MP:0005438                             | abnormal glycogen homeostasis                                          | 0.46            |
| ENSG00000150768                        | DLAT PPI subnetwork                                                    | 0.46            |
| GO:0002221                             | pattern recognition receptor signaling pathway                         | 0.46            |
| GO:0050911                             | detection of chemical stimulus involved in sensory perception of smell | 0.46            |
| GO:0070461                             | SAGA-type complex                                                      | 0.46            |
| GO:0034399                             | nuclear periphery                                                      | 0.46            |
| ENSG00000179071                        | CCDC89 PPI subnetwork                                                  | 0.46            |
| MP:0000746                             | weakness                                                               | 0.46            |
| ENSG00000135999                        | EPC2 PPI subnetwork                                                    | 0.46            |
| KEGG_PROSTATE_CANCER                   | KEGG_PROSTATE_CANCER                                                   | 0.46            |
| MP:0002576                             | abnormal enamel morphology                                             | 0.46            |



| Original gene set ID                | Original gene set description                      | Nominal P value |
|-------------------------------------|----------------------------------------------------|-----------------|
| ENSG00000162735                     | PEX19 PPI subnetwork                               | 0.46            |
| ENSG00000009335                     | UBE3C PPI subnetwork                               | 0.46            |
| MP:0001675                          | abnormal ectoderm development                      | 0.46            |
| ENSG00000113558                     | SKP1 PPI subnetwork                                | 0.46            |
| ENSG00000042980                     | ADAM28 PPI subnetwork                              | 0.46            |
| MP:0001870                          | salivary gland inflammation                        | 0.46            |
| ENSG00000167461                     | RAB8A PPI subnetwork                               | 0.46            |
| ENSG00000163599                     | CTLA4 PPI subnetwork                               | 0.46            |
| GO:0060420                          | regulation of heart growth                         | 0.46            |
| MP:0002546                          | mydriasis                                          | 0.46            |
| MP:0002495                          | increased IgA level                                | 0.46            |
| ENSG00000104613                     | INTS10 PPI subnetwork                              | 0.46            |
| MP:0000135                          | decreased compact bone thickness                   | 0.46            |
| ENSG00000132109                     | TRIM21 PPI subnetwork                              | 0.46            |
| GO:0034130                          | toll-like receptor 1 signaling pathway             | 0.46            |
| ENSG00000099860                     | GADD45B PPI subnetwork                             | 0.46            |
| GO:0005769                          | early endosome                                     | 0.46            |
| MP:0002184                          | abnormal innervation                               | 0.46            |
| GO:0070588                          | calcium ion transmembrane transport                | 0.46            |
| MP:0003215                          | renal interstitial fibrosis                        | 0.46            |
| ENSG00000105048                     | TNNT1 PPI subnetwork                               | 0.46            |
| MP:0008828                          | abnormal lymph node cell ratio                     | 0.46            |
| GO:0051084                          | 'de novo' posttranslational protein folding        | 0.46            |
| GO:0008250                          | oligosaccharyltransferase complex                  | 0.46            |
| GO:0006271                          | DNA strand elongation involved in DNA replication  | 0.46            |
| MP:0002884                          | abnormal branchial arch morphology                 | 0.46            |
| ENSG00000083520                     | DIS3 PPI subnetwork                                | 0.46            |
| ENSG00000164061                     | BSN PPI subnetwork                                 | 0.46            |
| MP:0002080                          | prenatal lethality                                 | 0.46            |
| MP:0000886                          | abnormal cerebellar granule layer                  | 0.46            |
| ENSG00000009790                     | TRAF3IP3 PPI subnetwork                            | 0.46            |
| ENSG00000211799                     | ENSG00000211799 PPI subnetwork                     | 0.46            |
| ENSG00000211810                     | ENSG00000211810 PPI subnetwork                     | 0.46            |
| ENSG00000211739                     | ENSG00000211739 PPI subnetwork                     | 0.46            |
| ENSG00000211735                     | ENSG00000211735 PPI subnetwork                     | 0.46            |
| GO:0043407                          | negative regulation of MAP kinase activity         | 0.46            |
| GO:0045815                          | positive regulation of gene expression, epigenetic | 0.46            |
| ENSG00000175104                     | TRAF6 PPI subnetwork                               | 0.46            |
| ENSG00000139505                     | MTMR6 PPI subnetwork                               | 0.46            |
| ENSG00000133313                     | CNDP2 PPI subnetwork                               | 0.46            |
| REACTOME_INTERFERON_GAMMA_SIGNALING | REACTOME_INTERFERON_GAMMA_SIGNALING                | 0.46            |
| GO:0046887                          | positive regulation of hormone secretion           | 0.46            |
| KEGG_STEROID_HORMONE_BIOSYNTHESIS   | KEGG_STEROID_HORMONE_BIOSYNTHESIS                  | 0.46            |
| GO:0050707                          | regulation of cytokine secretion                   | 0.46            |
| ENSG00000148053                     | NTRK2 PPI subnetwork                               | 0.46            |
| GO:0031109                          | microtubule polymerization or depolymerization     | 0.46            |
| MP:0002421                          | abnormal cell-mediated immunity                    | 0.46            |
| MP:0004448                          | abnormal presphenoid bone morphology               | 0.46            |
| MP:0002641                          | anisopoikilocytosis                                | 0.46            |

| Original gene set ID                                           | Original gene set description                                     | Nominal P value |
|----------------------------------------------------------------|-------------------------------------------------------------------|-----------------|
| GO:0051092                                                     | positive regulation of NF-kappaB transcription factor activity    | 0.46            |
| GO:0015697                                                     | quaternary ammonium group transport                               | 0.46            |
| REACTOME_TETRAHYDROBIOPTERIN_BH4_SYNTHESIS_RECYCLING_SALVAGE_A | REACTOME_TETRAHYDROBIOPTERIN_BH4_SYNTHESIS_RECYCLING_SALVAGE_AND_ | 0.46            |
| MP:0000065                                                     | abnormal bone marrow cavity morphology                            | 0.46            |
| GO:0002286                                                     | T cell activation involved in immune response                     | 0.46            |
| MP:0002672                                                     | abnormal branchial arch artery morphology                         | 0.46            |
| MP:0003990                                                     | decreased neurotransmitter release                                | 0.46            |
| GO:0019637                                                     | organophosphate metabolic process                                 | 0.46            |
| REACTOME_NEUROTRANSMITTER_RELEASE_CYCLE                        | REACTOME_NEUROTRANSMITTER_RELEASE_CYCLE                           | 0.46            |
| GO:0008047                                                     | enzyme activator activity                                         | 0.46            |
| REACTOME_FGFR2C_LIGAND_BINDING_AND_ACTIVATION                  | REACTOME_FGFR2C_LIGAND_BINDING_AND_ACTIVATION                     | 0.46            |
| GO:0003206                                                     | cardiac chamber morphogenesis                                     | 0.46            |
| MP:0002275                                                     | abnormal type II pneumocyte morphology                            | 0.46            |
| ENSG00000196419                                                | XRCC6 PPI subnetwork                                              | 0.46            |
| MP:0008217                                                     | abnormal B cell activation                                        | 0.46            |
| GO:0006096                                                     | glycolysis                                                        | 0.46            |
| GO:0005916                                                     | fascia adherens                                                   | 0.46            |
| GO:0005248                                                     | voltage-gated sodium channel activity                             | 0.46            |
| KEGG_LONG_TERM_DEPRESSION                                      | KEGG_LONG_TERM_DEPRESSION                                         | 0.46            |
| MP:0004418                                                     | small parietal bone                                               | 0.46            |
| ENSG00000187079                                                | TEAD1 PPI subnetwork                                              | 0.46            |
| ENSG00000165156                                                | ZHX1 PPI subnetwork                                               | 0.46            |
| ENSG00000131788                                                | PIAS3 PPI subnetwork                                              | 0.46            |
| ENSG00000155229                                                | MMS19 PPI subnetwork                                              | 0.46            |
| GO:0060411                                                     | cardiac septum morphogenesis                                      | 0.46            |
| GO:0000819                                                     | sister chromatid segregation                                      | 0.46            |
| GO:0060412                                                     | ventricular septum morphogenesis                                  | 0.46            |
| GO:0050909                                                     | sensory perception of taste                                       | 0.46            |
| GO:0043584                                                     | nose development                                                  | 0.46            |
| GO:0006026                                                     | aminoglycan catabolic process                                     | 0.46            |
| ENSG00000145692                                                | BHMT PPI subnetwork                                               | 0.46            |
| GO:0048665                                                     | neuron fate specification                                         | 0.46            |
| GO:0031519                                                     | PcG protein complex                                               | 0.46            |
| ENSG00000125249                                                | RAP2A PPI subnetwork                                              | 0.46            |
| GO:0048610                                                     | cellular process involved in reproduction                         | 0.46            |
| ENSG00000039319                                                | ZFYVE16 PPI subnetwork                                            | 0.46            |
| ENSG00000124207                                                | CSE1L PPI subnetwork                                              | 0.46            |
| ENSG00000147010                                                | SH3KBP1 PPI subnetwork                                            | 0.46            |
| ENSG00000143867                                                | OSR1 PPI subnetwork                                               | 0.46            |
| ENSG00000141447                                                | OSBPL1A PPI subnetwork                                            | 0.46            |
| ENSG00000154310                                                | TNIK PPI subnetwork                                               | 0.46            |
| GO:0060444                                                     | branching involved in mammary gland duct morphogenesis            | 0.46            |
| ENSG00000180855                                                | ZNF443 PPI subnetwork                                             | 0.46            |
| ENSG00000077549                                                | CAPZB PPI subnetwork                                              | 0.46            |
| GO:0015108                                                     | chloride transmembrane transporter activity                       | 0.46            |
| MP:0011088                                                     | partial neonatal lethality                                        | 0.46            |
| MP:0002702                                                     | decreased circulating free fatty acid leve                        | 0.46            |
| ENSG00000174307                                                | PHLDA3 PPI subnetwork                                             | 0.47            |
| ENSG00000130758                                                | MAP3K10 PPI subnetwork                                            | 0.47            |

| Original gene set ID                                               | Original gene set description                                             | Nominal P value |
|--------------------------------------------------------------------|---------------------------------------------------------------------------|-----------------|
| ENSG00000110799                                                    | VWF PPI subnetwork                                                        | 0.47            |
| REACTOME_PURINE_METABOLISM                                         | REACTOME_PURINE_METABOLISM                                                | 0.47            |
| ENSG00000126458                                                    | RRAS PPI subnetwork                                                       | 0.47            |
| MP:0001529                                                         | abnormal vocalization                                                     | 0.47            |
| MP:0000599                                                         | enlarged liver                                                            | 0.47            |
| MP:0003560                                                         | osteoarthritis                                                            | 0.47            |
| ENSG00000145817                                                    | YIPF5 PPI subnetwork                                                      | 0.47            |
| GO:0001502                                                         | cartilage condensation                                                    | 0.47            |
| ENSG00000164708                                                    | PGAM2 PPI subnetwork                                                      | 0.47            |
| ENSG00000089154                                                    | GCN1L1 PPI subnetwork                                                     | 0.47            |
| GO:0042059                                                         | negative regulation of epidermal growth factor receptor signaling pathway | 0.47            |
| ENSG00000105447                                                    | GRWD1 PPI subnetwork                                                      | 0.47            |
| MP:0001364                                                         | decreased anxiety-related response                                        | 0.47            |
| REACTOME_RNA_POLYMERASE_III_TRANSCRIPTION_INITIATION_FROM_TYPE_1_P | REACTOME_RNA_POLYMERASE_III_TRANSCRIPTION_INITIATION_FROM_TYPE_1_P        | 0.47            |
| ENSG00000183520                                                    | UTP11L PPI subnetwork                                                     | 0.47            |
| REACTOME_FGFR4_LIGAND_BINDING_AND_ACTIVATION                       | REACTOME_FGFR4_LIGAND_BINDING_AND_ACTIVATION                              | 0.47            |
| ENSG00000130561                                                    | SAG PPI subnetwork                                                        | 0.47            |
| ENSG00000173011                                                    | TADA2B PPI subnetwork                                                     | 0.47            |
| ENSG00000197892                                                    | KIF13B PPI subnetwork                                                     | 0.47            |
| ENSG00000198851                                                    | CD3E PPI subnetwork                                                       | 0.47            |
| ENSG00000135547                                                    | HEY2 PPI subnetwork                                                       | 0.47            |
| MP:0008212                                                         | absent mature B cells                                                     | 0.47            |
| GO:0015837                                                         | amine transport                                                           | 0.47            |
| GO:0006749                                                         | glutathione metabolic process                                             | 0.47            |
| ENSG00000150455                                                    | TIRAP PPI subnetwork                                                      | 0.47            |
| ENSG00000183117                                                    | CSMD1 PPI subnetwork                                                      | 0.47            |
| ENSG00000069275                                                    | NUCKS1 PPI subnetwork                                                     | 0.47            |
| ENSG00000108515                                                    | ENO3 PPI subnetwork                                                       | 0.47            |
| GO:0060840                                                         | artery development                                                        | 0.47            |
| ENSG00000178028                                                    | DMAP1 PPI subnetwork                                                      | 0.47            |
| ENSG00000163602                                                    | RYBP PPI subnetwork                                                       | 0.47            |
| ENSG00000125991                                                    | ERGIC3 PPI subnetwork                                                     | 0.47            |
| ENSG00000144029                                                    | MRPS5 PPI subnetwork                                                      | 0.47            |
| REACTOME_FRS2:MEDIATED_ACTIVATION                                  | REACTOME_FRS2:MEDIATED_ACTIVATION                                         | 0.47            |
| MP:0000067                                                         | osteopetrosis                                                             | 0.47            |
| ENSG00000040199                                                    | PHLPP2 PPI subnetwork                                                     | 0.47            |
| ENSG00000135338                                                    | LCA5 PPI subnetwork                                                       | 0.47            |
| ENSG00000144566                                                    | RAB5A PPI subnetwork                                                      | 0.47            |
| KEGG_PATHOGENIC_ESCHERICHIA_COLI_INFECTION                         | KEGG_PATHOGENIC_ESCHERICHIA_COLI_INFECTION                                | 0.47            |
| ENSG00000072210                                                    | ALDH3A2 PPI subnetwork                                                    | 0.47            |
| GO:0032365                                                         | intracellular lipid transport                                             | 0.47            |
| MP:0004024                                                         | aneuploidy                                                                | 0.47            |
| REACTOME_HORMONE:SENSITIVE_LIPASE_HSL:MEDIATED_TRIACYLGLYCEROL_HYD | REACTOME_HORMONE:SENSITIVE_LIPASE_HSL:MEDIATED_TRIACYLGLYCEROL_HYD        | 0.47            |
| KEGG_SPHINGOLIPID_METABOLISM                                       | KEGG_SPHINGOLIPID_METABOLISM                                              | 0.47            |
| ENSG00000214265                                                    | SNURF PPI subnetwork                                                      | 0.47            |
| GO:0032269                                                         | negative regulation of cellular protein metabolic process                 | 0.47            |
| ENSG00000007237                                                    | GAS7 PPI subnetwork                                                       | 0.47            |
| MP:0002643                                                         | poikilocytosis                                                            | 0.47            |
| GO:0001783                                                         | B cell apoptotic process                                                  | 0.47            |

**Original gene set ID****Original gene set description****Nominal P value**

|                                               |                                                        |      |
|-----------------------------------------------|--------------------------------------------------------|------|
| ENSG00000073111                               | MCM2 PPI subnetwork                                    | 0.47 |
| ENSG00000181191                               | PJA1 PPI subnetwork                                    | 0.47 |
| ENSG00000169251                               | NMD3 PPI subnetwork                                    | 0.47 |
| GO:0030259                                    | lipid glycosylation                                    | 0.47 |
| ENSG00000117000                               | RLF PPI subnetwork                                     | 0.47 |
| ENSG00000204227                               | RING1 PPI subnetwork                                   | 0.47 |
| ENSG00000206287                               | RING1 PPI subnetwork                                   | 0.47 |
| ENSG00000206215                               | ENSG00000206215 PPI subnetwork                         | 0.47 |
| GO:0048017                                    | inositol lipid-mediated signaling                      | 0.47 |
| GO:0048015                                    | phosphatidylinositol-mediated signaling                | 0.47 |
| GO:2000104                                    | negative regulation of DNA-dependent DNA replication   | 0.47 |
| REACTOME_NUCLEOTIDE:LIKE_PURINERGIC_RECEPTORS | REACTOME_NUCLEOTIDE:LIKE_PURINERGIC_RECEPTORS          | 0.47 |
| ENSG00000211790                               | ENSG00000211790 PPI subnetwork                         | 0.47 |
| ENSG00000189162                               | ENSG00000189162 PPI subnetwork                         | 0.47 |
| ENSG00000181163                               | NPM1 PPI subnetwork                                    | 0.47 |
| ENSG00000137413                               | TAF8 PPI subnetwork                                    | 0.47 |
| REACTOME_AMINE:DERIVED_HORMONES               | REACTOME_AMINE:DERIVED_HORMONES                        | 0.47 |
| GO:0034470                                    | ncRNA processing                                       | 0.47 |
| ENSG00000214021                               | TLL3 PPI subnetwork                                    | 0.47 |
| ENSG00000092820                               | EZR PPI subnetwork                                     | 0.47 |
| GO:0005244                                    | voltage-gated ion channel activity                     | 0.47 |
| GO:0022832                                    | voltage-gated channel activity                         | 0.47 |
| REACTOME_DNA_STRAND_ELONGATION                | REACTOME_DNA_STRAND_ELONGATION                         | 0.47 |
| ENSG00000137709                               | POU2F3 PPI subnetwork                                  | 0.47 |
| ENSG00000108179                               | PPIF PPI subnetwork                                    | 0.47 |
| MP:0001053                                    | abnormal neuromuscular synapse morphology              | 0.47 |
| REACTOME_O:LINKED_GLYCOSYLATION_OF_MUCINS     | REACTOME_O:LINKED_GLYCOSYLATION_OF_MUCINS              | 0.47 |
| ENSG00000160654                               | CD3G PPI subnetwork                                    | 0.47 |
| ENSG00000074266                               | EED PPI subnetwork                                     | 0.47 |
| GO:0042976                                    | activation of Janus kinase activity                    | 0.47 |
| GO:0002274                                    | myeloid leukocyte activation                           | 0.47 |
| GO:0003205                                    | cardiac chamber development                            | 0.47 |
| KEGG_PYRIMIDINE_METABOLISM                    | KEGG_PYRIMIDINE_METABOLISM                             | 0.47 |
| MP:0008657                                    | increased interleukin-1 beta secretion                 | 0.47 |
| ENSG00000100664                               | EIF5 PPI subnetwork                                    | 0.47 |
| ENSG0000015171                                | ZMYND11 PPI subnetwork                                 | 0.47 |
| GO:0000151                                    | ubiquitin ligase complex                               | 0.47 |
| GO:0005643                                    | nuclear pore                                           | 0.47 |
| MP:0001853                                    | heart inflammation                                     | 0.47 |
| GO:0010970                                    | microtubule-based transport                            | 0.47 |
| ENSG00000148308                               | GTF3C5 PPI subnetwork                                  | 0.47 |
| ENSG00000138081                               | FBXO11 PPI subnetwork                                  | 0.47 |
| ENSG00000175324                               | LSM1 PPI subnetwork                                    | 0.47 |
| ENSG00000100902                               | PSMA6 PPI subnetwork                                   | 0.47 |
| GO:0050678                                    | regulation of epithelial cell proliferation            | 0.47 |
| MP:0008713                                    | abnormal cytokine level                                | 0.47 |
| GO:0071774                                    | response to fibroblast growth factor stimulus          | 0.47 |
| GO:0044344                                    | cellular response to fibroblast growth factor stimulus | 0.47 |
| GO:0022603                                    | regulation of anatomical structure morphogenesis       | 0.47 |



**Original gene set ID****Original gene set description****Nominal P value**

|                                              |                                                   |      |
|----------------------------------------------|---------------------------------------------------|------|
| MP:0000681                                   | abnormal thyroid gland morphology                 | 0.48 |
| GO:0015929                                   | hexosaminidase activity                           | 0.48 |
| ENSG000000125352                             | RNF113A PPI subnetwork                            | 0.48 |
| ENSG000000187840                             | EIF4EBP1 PPI subnetwork                           | 0.48 |
| ENSG000000115966                             | ATF2 PPI subnetwork                               | 0.48 |
| ENSG000000160844                             | GATS PPI subnetwork                               | 0.48 |
| GO:0060759                                   | regulation of response to cytokine stimulus       | 0.48 |
| ENSG000000140332                             | TLE3 PPI subnetwork                               | 0.48 |
| GO:0000075                                   | cell cycle checkpoint                             | 0.48 |
| GO:0051101                                   | regulation of DNA binding                         | 0.48 |
| ENSG000000108561                             | C1QBP PPI subnetwork                              | 0.48 |
| ENSG000000108424                             | KPNB1 PPI subnetwork                              | 0.48 |
| ENSG000000138032                             | PPM1B PPI subnetwork                              | 0.48 |
| ENSG000000135097                             | MSI1 PPI subnetwork                               | 0.48 |
| GO:0044297                                   | cell body                                         | 0.48 |
| GO:0000289                                   | nuclear-transcribed mRNA poly(A) tail shortening  | 0.48 |
| ENSG000000115274                             | INO80B PPI subnetwork                             | 0.48 |
| ENSG000000173207                             | CKS1B PPI subnetwork                              | 0.48 |
| GO:0003279                                   | cardiac septum development                        | 0.48 |
| ENSG00000018236                              | CNTN1 PPI subnetwork                              | 0.48 |
| MP:0002359                                   | abnormal spleen germinal center morphology        | 0.48 |
| ENSG000000164889                             | SLC4A2 PPI subnetwork                             | 0.48 |
| ENSG000000044574                             | HSPA5 PPI subnetwork                              | 0.48 |
| ENSG000000179348                             | GATA2 PPI subnetwork                              | 0.48 |
| MP:0002391                                   | abnormal Peyer's patch germinal center morphology | 0.48 |
| MP:0001404                                   | no spontaneous movement                           | 0.48 |
| ENSG000000170876                             | TMEM43 PPI subnetwork                             | 0.48 |
| GO:0016079                                   | synaptic vesicle exocytosis                       | 0.48 |
| ENSG000000105880                             | DLX5 PPI subnetwork                               | 0.48 |
| GO:0045851                                   | pH reduction                                      | 0.48 |
| ENSG000000135333                             | EPHA7 PPI subnetwork                              | 0.48 |
| ENSG000000114166                             | KAT2B PPI subnetwork                              | 0.48 |
| GO:0002712                                   | regulation of B cell mediated immunity            | 0.48 |
| REACTOME_FGFR2_LIGAND_BINDING_AND_ACTIVATION | REACTOME_FGFR2_LIGAND_BINDING_AND_ACTIVATION      | 0.48 |
| GO:0001910                                   | regulation of leukocyte mediated cytotoxicity     | 0.48 |
| ENSG000000157349                             | DDX19B PPI subnetwork                             | 0.48 |
| MP:0004057                                   | thin myocardium compact layer                     | 0.48 |
| GO:0031214                                   | biomineral tissue development                     | 0.48 |
| MP:0003675                                   | kidney cysts                                      | 0.48 |
| GO:0001578                                   | microtubule bundle formation                      | 0.48 |
| ENSG000000140400                             | MAN2C1 PPI subnetwork                             | 0.48 |
| ENSG000000102893                             | PHKB PPI subnetwork                               | 0.48 |
| GO:0006687                                   | glycosphingolipid metabolic process               | 0.48 |
| ENSG000000008056                             | SYN1 PPI subnetwork                               | 0.48 |
| MP:0000755                                   | hindlimb paralysis                                | 0.48 |
| MP:0002362                                   | abnormal spleen marginal zone morphology          | 0.48 |
| GO:0032623                                   | interleukin-2 production                          | 0.48 |
| ENSG000000143373                             | ZNF687 PPI subnetwork                             | 0.48 |
| MP:0001929                                   | abnormal gametogenesis                            | 0.48 |







| Original gene set ID                                   | Original gene set description                          | Nominal P value |
|--------------------------------------------------------|--------------------------------------------------------|-----------------|
| ENSG00000125818                                        | PSMF1 PPI subnetwork                                   | 0.49            |
| GO:0045123                                             | cellular extravasation                                 | 0.49            |
| ENSG00000078967                                        | UBE2D4 PPI subnetwork                                  | 0.49            |
| ENSG00000129351                                        | ILF3 PPI subnetwork                                    | 0.49            |
| ENSG00000149131                                        | SERPING1 PPI subnetwork                                | 0.49            |
| ENSG00000104408                                        | EIF3E PPI subnetwork                                   | 0.49            |
| ENSG00000152795                                        | HNRPDL PPI subnetwork                                  | 0.49            |
| GO:0033627                                             | cell adhesion mediated by integrin                     | 0.49            |
| ENSG00000211889                                        | ENSG00000211889 PPI subnetwork                         | 0.49            |
| ENSG00000137975                                        | CLCA2 PPI subnetwork                                   | 0.49            |
| ENSG00000157514                                        | TSC22D3 PPI subnetwork                                 | 0.49            |
| ENSG00000100284                                        | TOM1 PPI subnetwork                                    | 0.49            |
| ENSG00000124145                                        | SDC4 PPI subnetwork                                    | 0.49            |
| ENSG00000147082                                        | CCNB3 PPI subnetwork                                   | 0.49            |
| ENSG00000078699                                        | CBFA2T2 PPI subnetwork                                 | 0.49            |
| ENSG00000184216                                        | IRAK1 PPI subnetwork                                   | 0.49            |
| ENSG00000115942                                        | ORC2 PPI subnetwork                                    | 0.49            |
| ENSG00000168924                                        | LETM1 PPI subnetwork                                   | 0.49            |
| ENSG00000079246                                        | XRCC5 PPI subnetwork                                   | 0.49            |
| REACTOME_SIGNALING_BY_FGFR                             | REACTOME_SIGNALING_BY_FGFR                             | 0.49            |
| KEGG_PRION_DISEASES                                    | KEGG_PRION_DISEASES                                    | 0.49            |
| REACTOME_PYRUVATE_METABOLISM_AND_CITRIC_ACID_TCA_CYCLE | REACTOME_PYRUVATE_METABOLISM_AND_CITRIC_ACID_TCA_CYCLE | 0.49            |
| ENSG00000137309                                        | HMGA1 PPI subnetwork                                   | 0.49            |
| ENSG00000072803                                        | FBXW11 PPI subnetwork                                  | 0.49            |
| MP:0000920                                             | abnormal myelination                                   | 0.49            |
| MP:0009764                                             | decreased sensitivity to induced morbidity/mortality   | 0.49            |
| ENSG00000105989                                        | WNT2 PPI subnetwork                                    | 0.49            |
| ENSG00000075290                                        | WNT8B PPI subnetwork                                   | 0.49            |
| ENSG00000143816                                        | WNT9A PPI subnetwork                                   | 0.49            |
| ENSG00000169884                                        | WNT10B PPI subnetwork                                  | 0.49            |
| ENSG00000135925                                        | WNT10A PPI subnetwork                                  | 0.49            |
| ENSG00000158955                                        | WNT9B PPI subnetwork                                   | 0.49            |
| ENSG00000085741                                        | WNT11 PPI subnetwork                                   | 0.49            |
| ENSG00000061492                                        | WNT8A PPI subnetwork                                   | 0.49            |
| ENSG00000146109                                        | ABT1 PPI subnetwork                                    | 0.49            |
| ENSG00000175063                                        | UBE2C PPI subnetwork                                   | 0.49            |
| MP:0002774                                             | small prostate gland                                   | 0.49            |
| ENSG00000116560                                        | SFPQ PPI subnetwork                                    | 0.49            |
| GO:0022803                                             | passive transmembrane transporter activity             | 0.49            |
| GO:0015267                                             | channel activity                                       | 0.49            |
| GO:0061138                                             | morphogenesis of a branching epithelium                | 0.49            |
| ENSG00000100201                                        | DDX17 PPI subnetwork                                   | 0.49            |
| ENSG00000104814                                        | MAP4K1 PPI subnetwork                                  | 0.49            |
| ENSG00000166225                                        | FRS2 PPI subnetwork                                    | 0.49            |
| ENSG00000145901                                        | TNIP1 PPI subnetwork                                   | 0.49            |
| ENSG00000185245                                        | GP1BA PPI subnetwork                                   | 0.5             |
| MP:0001045                                             | abnormal enteric ganglia morphology                    | 0.5             |
| ENSG00000158796                                        | DEDD PPI subnetwork                                    | 0.5             |
| MP:0000435                                             | shortened head                                         | 0.5             |

| Original gene set ID            | Original gene set description                                                         | Nominal P value |
|---------------------------------|---------------------------------------------------------------------------------------|-----------------|
| GO:0045005                      | maintenance of fidelity involved in DNA-dependent DNA replicator                      | 0.5             |
| REACTOME_EXTENSION_OF_TELOMERES | REACTOME_EXTENSION_OF_TELOMERES                                                       | 0.5             |
| GO:0060603                      | mammary gland duct morphogenesis                                                      | 0.5             |
| REACTOME_PURINE_SALVAGE         | REACTOME_PURINE_SALVAGE                                                               | 0.5             |
| ENSG00000161570                 | CCL5 PPI subnetwork                                                                   | 0.5             |
| ENSG00000203283                 | ENSG00000203283 PPI subnetwork                                                        | 0.5             |
| GO:0042108                      | positive regulation of cytokine biosynthetic process                                  | 0.5             |
| GO:0002285                      | lymphocyte activation involved in immune response                                     | 0.5             |
| GO:0000725                      | recombinational repair                                                                | 0.5             |
| ENSG00000061337                 | LZTS1 PPI subnetwork                                                                  | 0.5             |
| GO:0006582                      | melanin metabolic process                                                             | 0.5             |
| ENSG00000115596                 | WNT6 PPI subnetwork                                                                   | 0.5             |
| ENSG00000101132                 | PFDN4 PPI subnetwork                                                                  | 0.5             |
| ENSG00000142507                 | PSMB6 PPI subnetwork                                                                  | 0.5             |
| GO:0051640                      | organelle localization                                                                | 0.5             |
| ENSG00000074047                 | GLI2 PPI subnetwork                                                                   | 0.5             |
| GO:0014823                      | response to activity                                                                  | 0.5             |
| MP:0003049                      | abnormal lumbar vertebrae morphology                                                  | 0.5             |
| MP:0008496                      | decreased IgG2a level                                                                 | 0.5             |
| ENSG00000101557                 | USP14 PPI subnetwork                                                                  | 0.5             |
| KEGG_GNRH_SIGNALING_PATHWAY     | KEGG_GNRH_SIGNALING_PATHWAY                                                           | 0.5             |
| MP:0002059                      | abnormal seminal vesicle morphology                                                   | 0.5             |
| ENSG00000108231                 | LG11 PPI subnetwork                                                                   | 0.5             |
| ENSG00000149428                 | HYOU1 PPI subnetwork                                                                  | 0.5             |
| ENSG00000139352                 | ASCL1 PPI subnetwork                                                                  | 0.5             |
| MP:0010724                      | thick interventricular septum                                                         | 0.5             |
| GO:0050680                      | negative regulation of epithelial cell proliferation                                  | 0.5             |
| KEGG_THYROID_CANCER             | KEGG_THYROID_CANCER                                                                   | 0.5             |
| GO:0008635                      | activation of cysteine-type endopeptidase activity involved in apoptotic process by c | 0.5             |
| ENSG00000184203                 | PPP1R2 PPI subnetwork                                                                 | 0.5             |
| ENSG00000187558                 | ENSG00000187558 PPI subnetwork                                                        | 0.5             |
| ENSG00000107341                 | UBE2R2 PPI subnetwork                                                                 | 0.5             |
| GO:0030666                      | endocytic vesicle membrane                                                            | 0.5             |
| MP:0001324                      | abnormal eye pigmentation                                                             | 0.5             |
| MP:0002761                      | abnormal hippocampal mossy fiber morphology                                           | 0.5             |
| ENSG00000088926                 | F11 PPI subnetwork                                                                    | 0.5             |
| ENSG00000134453                 | RBM17 PPI subnetwork                                                                  | 0.5             |
| GO:0042398                      | cellular modified amino acid biosynthetic process                                     | 0.5             |
| GO:0016887                      | ATPase activity                                                                       | 0.5             |
| GO:0002040                      | sprouting angiogenesis                                                                | 0.5             |
| GO:0051329                      | interphase of mitotic cell cycle                                                      | 0.5             |
| GO:0030315                      | T-tubule                                                                              | 0.5             |
| ENSG00000155097                 | ATP6V1C1 PPI subnetwork                                                               | 0.5             |
| MP:0002640                      | reticulocytosis                                                                       | 0.5             |
| GO:0031256                      | leading edge membrane                                                                 | 0.5             |
| ENSG00000141480                 | ARRB2 PPI subnetwork                                                                  | 0.5             |
| GO:0071156                      | regulation of cell cycle arrest                                                       | 0.5             |
| GO:0000724                      | double-strand break repair via homologous recombination                               | 0.5             |
| ENSG00000125753                 | VASP PPI subnetwork                                                                   | 0.5             |

| Original gene set ID                                            | Original gene set description                                    | Nominal P value |
|-----------------------------------------------------------------|------------------------------------------------------------------|-----------------|
| KEGG_PANTOTHENATE_AND_COA_BIOSYNTHESIS                          | KEGG_PANTOTHENATE_AND_COA_BIOSYNTHESIS                           | 0.5             |
| ENSG00000106089                                                 | STX1A PPI subnetwork                                             | 0.5             |
| GO:0051248                                                      | negative regulation of protein metabolic process                 | 0.5             |
| GO:0045639                                                      | positive regulation of myeloid cell differentiator               | 0.5             |
| GO:0048029                                                      | monosaccharide binding                                           | 0.5             |
| MP:0000438                                                      | abnormal cranium morphology                                      | 0.5             |
| GO:0043235                                                      | receptor complex                                                 | 0.5             |
| REACTOME_RNA_POLYMERASE_III_TRANSCRIPTION_INITIATION            | REACTOME_RNA_POLYMERASE_III_TRANSCRIPTION_INITIATION             | 0.5             |
| REACTOME_IRAK2_MEDIATED_ACTIVATION_OF_TAK1_COMPLEX_UPON_TLR78   | REACTOME_IRAK2_MEDIATED_ACTIVATION_OF_TAK1_COMPLEX_UPON_TLR78_OF | 0.5             |
| GO:0007131                                                      | reciprocal meiotic recombination                                 | 0.5             |
| GO:0035825                                                      | reciprocal DNA recombination                                     | 0.5             |
| GO:0006301                                                      | postreplication repair                                           | 0.5             |
| GO:0046530                                                      | photoreceptor cell differentiation                               | 0.5             |
| ENSG00000139182                                                 | CLSTN3 PPI subnetwork                                            | 0.5             |
| MP:0002027                                                      | lung adenocarcinoma                                              | 0.5             |
| GO:0008081                                                      | phosphoric diester hydrolase activity                            | 0.5             |
| ENSG00000112651                                                 | MRPL2 PPI subnetwork                                             | 0.5             |
| ENSG00000198216                                                 | CACNA1E PPI subnetwork                                           | 0.5             |
| KEGG_PHOSPHATIDYLINOSITOL_SIGNALING_SYSTEM                      | KEGG_PHOSPHATIDYLINOSITOL_SIGNALING_SYSTEM                       | 0.5             |
| GO:0051004                                                      | regulation of lipoprotein lipase activity                        | 0.5             |
| MP:0004763                                                      | absent brainstem auditory evoked potentia                        | 0.5             |
| GO:0007062                                                      | sister chromatid cohesion                                        | 0.5             |
| ENSG00000011465                                                 | DCN PPI subnetwork                                               | 0.5             |
| ENSG00000182359                                                 | KBTBD3 PPI subnetwork                                            | 0.5             |
| ENSG00000082516                                                 | GEMIN5 PPI subnetwork                                            | 0.5             |
| GO:0008286                                                      | insulin receptor signaling pathway                               | 0.5             |
| GO:0032635                                                      | interleukin-6 production                                         | 0.5             |
| GO:0032675                                                      | regulation of interleukin-6 production                           | 0.5             |
| ENSG00000119414                                                 | PPP6C PPI subnetwork                                             | 0.5             |
| ENSG00000104064                                                 | GABPB1 PPI subnetwork                                            | 0.5             |
| ENSG00000131828                                                 | PDHA1 PPI subnetwork                                             | 0.5             |
| ENSG00000161920                                                 | MED11 PPI subnetwork                                             | 0.5             |
| ENSG00000163811                                                 | WDR43 PPI subnetwork                                             | 0.5             |
| MP:0004522                                                      | abnormal orientation of cochlear hair cell stereociliary bundles | 0.5             |
| REACTOME_CD28_CO:STIMULATION                                    | REACTOME_CD28_CO:STIMULATION                                     | 0.5             |
| ENSG00000137710                                                 | RDX PPI subnetwork                                               | 0.5             |
| ENSG00000130041                                                 | ENSG00000130041 PPI subnetwork                                   | 0.5             |
| ENSG00000177954                                                 | RPS27 PPI subnetwork                                             | 0.5             |
| ENSG00000183814                                                 | LIN9 PPI subnetwork                                              | 0.5             |
| REACTOME_SIGNALING_BY_WNT                                       | REACTOME_SIGNALING_BY_WNT                                        | 0.5             |
| REACTOME_DEGRADATION_OF_BETA:CATENIN_BY_THE_DESTRUCTION_COMPLEX | REACTOME_DEGRADATION_OF_BETA:CATENIN_BY_THE_DESTRUCTION_COMPLEX  | 0.5             |
| ENSG00000204523                                                 | ENSG00000204523 PPI subnetwork                                   | 0.5             |
| ENSG00000174405                                                 | LIG4 PPI subnetwork                                              | 0.5             |
| GO:0051271                                                      | negative regulation of cellular component movement               | 0.5             |
| GO:0032024                                                      | positive regulation of insulin secretior                         | 0.5             |
| MP:0005562                                                      | decreased mean corpuscular hemoglobin                            | 0.5             |
| GO:0033549                                                      | MAP kinase phosphatase activity                                  | 0.5             |
| ENSG00000140451                                                 | PIF1 PPI subnetwork                                              | 0.5             |
| GO:0003018                                                      | vascular process in circulatory system                           | 0.5             |

| Original gene set ID                                        | Original gene set description                                | Nominal P value |
|-------------------------------------------------------------|--------------------------------------------------------------|-----------------|
| GO:0031670                                                  | cellular response to nutrient                                | 0.5             |
| MP:0004726                                                  | abnormal nasal capsule morphology                            | 0.5             |
| ENSG00000055208                                             | TAB2 PPI subnetwork                                          | 0.5             |
| GO:0002573                                                  | myeloid leukocyte differentiation                            | 0.5             |
| ENSG00000196497                                             | IPO4 PPI subnetwork                                          | 0.5             |
| GO:0015081                                                  | sodium ion transmembrane transporter activity                | 0.5             |
| ENSG00000130803                                             | ZNF317 PPI subnetwork                                        | 0.5             |
| MP:0005145                                                  | increased circulating VLDL cholesterol leve                  | 0.5             |
| ENSG00000148943                                             | LIN7C PPI subnetwork                                         | 0.5             |
| MP:0005630                                                  | increased lung weight                                        | 0.5             |
| GO:0006754                                                  | ATP biosynthetic process                                     | 0.5             |
| ENSG00000082014                                             | SMARCD3 PPI subnetwork                                       | 0.5             |
| MP:0002397                                                  | abnormal bone marrow morphology                              | 0.5             |
| ENSG00000090054                                             | SPTLC1 PPI subnetwork                                        | 0.5             |
| ENSG00000158186                                             | MRAS PPI subnetwork                                          | 0.5             |
| MP:0005659                                                  | decreased susceptibility to diet-induced obesity             | 0.5             |
| GO:0030897                                                  | HOPS complex                                                 | 0.5             |
| GO:0042074                                                  | cell migration involved in gastrulation                      | 0.5             |
| GO:0010639                                                  | negative regulation of organelle organization                | 0.5             |
| GO:0050880                                                  | regulation of blood vessel size                              | 0.5             |
| ENSG00000153107                                             | ANAPC1 PPI subnetwork                                        | 0.5             |
| ENSG00000166147                                             | FBN1 PPI subnetwork                                          | 0.5             |
| ENSG00000174233                                             | ADCY6 PPI subnetwork                                         | 0.5             |
| REACTOME_RAS_ACTIVATION_UOPN_CA2_INFUX_THROUGH_NMDA_RECEPTO | REACTOME_RAS_ACTIVATION_UOPN_CA2_INFUX_THROUGH_NMDA_RECEPTOR | 0.5             |
| GO:0035036                                                  | sperm-egg recognition                                        | 0.5             |
| ENSG00000117500                                             | TMED5 PPI subnetwork                                         | 0.5             |
| ENSG00000127914                                             | AKAP9 PPI subnetwork                                         | 0.51            |
| GO:0050798                                                  | activated T cell proliferation                               | 0.51            |
| ENSG00000117360                                             | PRPF3 PPI subnetwork                                         | 0.51            |
| ENSG00000173372                                             | C1QA PPI subnetwork                                          | 0.51            |
| ENSG00000204301                                             | NOTCH4 PPI subnetwork                                        | 0.51            |
| REACTOME_MAP_KINASE_ACTIVATION_IN_TLR_CASCADE               | REACTOME_MAP_KINASE_ACTIVATION_IN_TLR_CASCADE                | 0.51            |
| GO:0043186                                                  | P granule                                                    | 0.51            |
| GO:0045495                                                  | pole plasm                                                   | 0.51            |
| GO:0060293                                                  | germ plasm                                                   | 0.51            |
| GO:0048016                                                  | inositol phosphate-mediated signaling                        | 0.51            |
| MP:0002024                                                  | T cell derived lymphoma                                      | 0.51            |
| GO:0055037                                                  | recycling endosome                                           | 0.51            |
| MP:0005172                                                  | reduced eye pigmentation                                     | 0.51            |
| GO:0004866                                                  | endopeptidase inhibitor activity                             | 0.51            |
| MP:0003194                                                  | abnormal frequency of paradoxical sleep                      | 0.51            |
| MP:0005543                                                  | corneal thinning                                             | 0.51            |
| ENSG00000071127                                             | WDR1 PPI subnetwork                                          | 0.51            |
| ENSG00000117322                                             | CR2 PPI subnetwork                                           | 0.51            |
| ENSG00000065675                                             | PRKCQ PPI subnetwork                                         | 0.51            |
| MP:0002747                                                  | abnormal aortic valve morphology                             | 0.51            |
| GO:0001948                                                  | glycoprotein binding                                         | 0.51            |
| GO:0043473                                                  | pigmentation                                                 | 0.51            |
| GO:0050867                                                  | positive regulation of cell activation                       | 0.51            |



| Original gene set ID                                                | Original gene set description                                       | Nominal P value |
|---------------------------------------------------------------------|---------------------------------------------------------------------|-----------------|
| GO:0006631                                                          | fatty acid metabolic process                                        | 0.51            |
| GO:0048546                                                          | digestive tract morphogenesis                                       | 0.51            |
| GO:0045444                                                          | fat cell differentiation                                            | 0.51            |
| REACTOME_GLUTATHIONE_SYNTHESIS_AND_RECYCLING                        | REACTOME_GLUTATHIONE_SYNTHESIS_AND_RECYCLING                        | 0.51            |
| ENSG00000169375                                                     | SIN3A PPI subnetwork                                                | 0.51            |
| ENSG00000147854                                                     | UHRF2 PPI subnetwork                                                | 0.51            |
| ENSG00000173876                                                     | TUBB8 PPI subnetwork                                                | 0.51            |
| MP:0000049                                                          | abnormal middle ear morphology                                      | 0.51            |
| GO:0051222                                                          | positive regulation of protein transport                            | 0.51            |
| ENSG00000119917                                                     | IFIT3 PPI subnetwork                                                | 0.51            |
| GO:0060113                                                          | inner ear receptor cell differentiation                             | 0.51            |
| GO:0060219                                                          | camera-type eye photoreceptor cell differentiator                   | 0.51            |
| GO:0035051                                                          | cardiac cell differentiation                                        | 0.51            |
| ENSG00000115750                                                     | TAF1B PPI subnetwork                                                | 0.51            |
| MP:0001516                                                          | abnormal motor coordination/ balance                                | 0.51            |
| GO:0019835                                                          | cytolysis                                                           | 0.51            |
| MP:0002273                                                          | abnormal pulmonary alveolus epithelial cell morphology              | 0.51            |
| GO:0050864                                                          | regulation of B cell activation                                     | 0.51            |
| MP:0003132                                                          | increased pre-B cell number                                         | 0.51            |
| GO:0060828                                                          | regulation of canonical Wnt receptor signaling pathway              | 0.51            |
| REACTOME_SEROTONIN_NEUROTRANSMITTER_RELEASE_CYCLE                   | REACTOME_SEROTONIN_NEUROTRANSMITTER_RELEASE_CYCLE                   | 0.51            |
| REACTOME_DOPAMINE_NEUROTRANSMITTER_RELEASE_CYCLE                    | REACTOME_DOPAMINE_NEUROTRANSMITTER_RELEASE_CYCLE                    | 0.51            |
| GO:0008629                                                          | induction of apoptosis by intracellular signals                     | 0.51            |
| ENSG00000167513                                                     | CDT1 PPI subnetwork                                                 | 0.51            |
| GO:0051251                                                          | positive regulation of lymphocyte activation                        | 0.51            |
| MP:0001092                                                          | abnormal trigeminal ganglion morphology                             | 0.51            |
| GO:0051147                                                          | regulation of muscle cell differentiation                           | 0.51            |
| REACTOME_RNA_POLYMERASE_III_TRANSCRIPTION_INITIATION_FROM_TYPE_2_Pf | REACTOME_RNA_POLYMERASE_III_TRANSCRIPTION_INITIATION_FROM_TYPE_2_Pf | 0.51            |
| ENSG00000131459                                                     | GFPT2 PPI subnetwork                                                | 0.51            |
| ENSG00000008294                                                     | SPAG9 PPI subnetwork                                                | 0.51            |
| GO:0040014                                                          | regulation of multicellular organism growth                         | 0.51            |
| KEGG_GLYCOPHINGOLIPID_BIOSYNTHESIS_GANGLIO_SERIES                   | KEGG_GLYCOPHINGOLIPID_BIOSYNTHESIS_GANGLIO_SERIES                   | 0.51            |
| GO:0030194                                                          | positive regulation of blood coagulation                            | 0.51            |
| MP:0006298                                                          | abnormal platelet activation                                        | 0.51            |
| ENSG00000156313                                                     | RPGR PPI subnetwork                                                 | 0.51            |
| ENSG00000078399                                                     | HOXA9 PPI subnetwork                                                | 0.51            |
| GO:0030837                                                          | negative regulation of actin filament polymerization                | 0.51            |
| REACTOME_INTERACTIONS_OF_VPR_WITH_HOST_CELLULAR_PROTEINS            | REACTOME_INTERACTIONS_OF_VPR_WITH_HOST_CELLULAR_PROTEINS            | 0.51            |
| GO:0060021                                                          | palate development                                                  | 0.51            |
| GO:0008180                                                          | signalosome                                                         | 0.51            |
| REACTOME_CREB_PHOSPHORYLATION_THROUGH_THE_ACTIVATION_OF_RAS         | REACTOME_CREB_PHOSPHORYLATION_THROUGH_THE_ACTIVATION_OF_RAS         | 0.51            |
| ENSG00000153914                                                     | SREK1 PPI subnetwork                                                | 0.51            |
| MP:0004098                                                          | abnormal cerebellar granule cell morphology                         | 0.51            |
| GO:0014031                                                          | mesenchymal cell development                                        | 0.52            |
| GO:2000514                                                          | regulation of CD4-positive, alpha-beta T cell activation            | 0.52            |
| ENSG00000139372                                                     | TDG PPI subnetwork                                                  | 0.52            |
| MP:0005362                                                          | abnormal Langerhans cell physiology                                 | 0.52            |
| REACTOME_RNA_POLYMERASE_III_CHAIN_ELONGATION                        | REACTOME_RNA_POLYMERASE_III_CHAIN_ELONGATION                        | 0.52            |
| GO:0070201                                                          | regulation of establishment of protein localizator                  | 0.52            |

| Original gene set ID                                           | Original gene set description                                      | Nominal P value |
|----------------------------------------------------------------|--------------------------------------------------------------------|-----------------|
| GO:0005657                                                     | replication fork                                                   | 0.52            |
| ENSG00000081479                                                | LRP2 PPI subnetwork                                                | 0.52            |
| ENSG00000071243                                                | ING3 PPI subnetwork                                                | 0.52            |
| GO:0007043                                                     | cell-cell junction assembly                                        | 0.52            |
| MP:0003938                                                     | abnormal ear development                                           | 0.52            |
| ENSG00000100722                                                | ZC3H14 PPI subnetwork                                              | 0.52            |
| ENSG00000135679                                                | MDM2 PPI subnetwork                                                | 0.52            |
| ENSG00000116106                                                | EPHA4 PPI subnetwork                                               | 0.52            |
| REACTOME_HIGHLY_CALCIUM_PERMEABLE_POSTSYNAPTIC_NICOTINIC_ACETY | REACTOME_HIGHLY_CALCIUM_PERMEABLE_POSTSYNAPTIC_NICOTINIC_ACETYLCHI | 0.52            |
| GO:0006937                                                     | regulation of muscle contraction                                   | 0.52            |
| ENSG00000165732                                                | DDX21 PPI subnetwork                                               | 0.52            |
| GO:0019438                                                     | aromatic compound biosynthetic process                             | 0.52            |
| ENSG00000175073                                                | VCPIP1 PPI subnetwork                                              | 0.52            |
| GO:0009113                                                     | purine base biosynthetic process                                   | 0.52            |
| GO:0072655                                                     | establishment of protein localization in mitochondrion             | 0.52            |
| GO:0044269                                                     | glycerol ether catabolic process                                   | 0.52            |
| GO:0046464                                                     | acylglycerol catabolic process                                     | 0.52            |
| GO:0046461                                                     | neutral lipid catabolic process                                    | 0.52            |
| MP:0003627                                                     | abnormal leukocyte tethering or rolling                            | 0.52            |
| KEGG_TGF_BETA_SIGNALING_PATHWAY                                | KEGG_TGF_BETA_SIGNALING_PATHWAY                                    | 0.52            |
| GO:0046148                                                     | pigment biosynthetic process                                       | 0.52            |
| ENSG00000215754                                                | ENSG00000215754 PPI subnetwork                                     | 0.52            |
| ENSG00000156802                                                | ATAD2 PPI subnetwork                                               | 0.52            |
| REACTOME_SYNTHESIS_OF_GLYCOSYLPHOSPHATIDYLINOSITOL_GPI         | REACTOME_SYNTHESIS_OF_GLYCOSYLPHOSPHATIDYLINOSITOL_GPI             | 0.52            |
| ENSG00000185024                                                | BRF1 PPI subnetwork                                                | 0.52            |
| ENSG00000149970                                                | CNKSR2 PPI subnetwork                                              | 0.52            |
| GO:0016579                                                     | protein deubiquitination                                           | 0.52            |
| GO:0043021                                                     | ribonucleoprotein complex binding                                  | 0.52            |
| MP:0006082                                                     | CNS inflammation                                                   | 0.52            |
| GO:0006362                                                     | transcription elongation from RNA polymerase I promoter            | 0.52            |
| ENSG00000197238                                                | HIST1H4J PPI subnetwork                                            | 0.52            |
| ENSG00000183941                                                | HIST2H4A PPI subnetwork                                            | 0.52            |
| ENSG00000197914                                                | HIST1H4K PPI subnetwork                                            | 0.52            |
| ENSG00000198518                                                | HIST1H4E PPI subnetwork                                            | 0.52            |
| ENSG00000197837                                                | HIST4H4 PPI subnetwork                                             | 0.52            |
| ENSG00000182217                                                | HIST2H4B PPI subnetwork                                            | 0.52            |
| ENSG00000158406                                                | HIST1H4H PPI subnetwork                                            | 0.52            |
| ENSG00000198558                                                | HIST1H4L PPI subnetwork                                            | 0.52            |
| ENSG00000124529                                                | HIST1H4B PPI subnetwork                                            | 0.52            |
| ENSG00000197061                                                | HIST1H4C PPI subnetwork                                            | 0.52            |
| ENSG00000188987                                                | HIST1H4D PPI subnetwork                                            | 0.52            |
| ENSG00000198339                                                | HIST1H4I PPI subnetwork                                            | 0.52            |
| ENSG00000198327                                                | HIST1H4F PPI subnetwork                                            | 0.52            |
| ENSG00000196176                                                | HIST1H4A PPI subnetwork                                            | 0.52            |
| ENSG00000104738                                                | MCM4 PPI subnetwork                                                | 0.52            |
| GO:0005930                                                     | axoneme                                                            | 0.52            |
| ENSG00000168374                                                | ARF4 PPI subnetwork                                                | 0.52            |
| GO:0002696                                                     | positive regulation of leukocyte activation                        | 0.52            |
| MP:0006138                                                     | congestive heart failure                                           | 0.52            |

| Original gene set ID                                | Original gene set description                                      | Nominal P value |
|-----------------------------------------------------|--------------------------------------------------------------------|-----------------|
| ENSG00000135269                                     | TES PPI subnetwork                                                 | 0.52            |
| MP:0000102                                          | abnormal nasal bone morphology                                     | 0.52            |
| ENSG00000108679                                     | LGALS3BP PPI subnetwork                                            | 0.52            |
| ENSG00000111229                                     | ARPC3 PPI subnetwork                                               | 0.52            |
| GO:0031105                                          | septin complex                                                     | 0.52            |
| GO:0032156                                          | septin cytoskeleton                                                | 0.52            |
| GO:0015297                                          | antiporter activity                                                | 0.52            |
| GO:0045665                                          | negative regulation of neuron differentiation                      | 0.52            |
| ENSG00000166266                                     | CUL5 PPI subnetwork                                                | 0.52            |
| GO:0050860                                          | negative regulation of T cell receptor signaling pathway           | 0.52            |
| GO:0050858                                          | negative regulation of antigen receptor-mediated signaling pathway | 0.52            |
| GO:0072378                                          | blood coagulation, fibrin clot formation                           | 0.52            |
| GO:0070848                                          | response to growth factor stimulus                                 | 0.52            |
| ENSG00000145191                                     | EIF2B5 PPI subnetwork                                              | 0.52            |
| GO:0061134                                          | peptidase regulator activity                                       | 0.52            |
| GO:0020027                                          | hemoglobin metabolic process                                       | 0.52            |
| ENSG00000145782                                     | ATG12 PPI subnetwork                                               | 0.52            |
| MP:0000876                                          | Purkinje cell degeneration                                         | 0.52            |
| GO:0042612                                          | MHC class I protein complex                                        | 0.52            |
| ENSG00000171421                                     | MRPL36 PPI subnetwork                                              | 0.52            |
| ENSG00000104856                                     | RELB PPI subnetwork                                                | 0.52            |
| GO:0060341                                          | regulation of cellular localization                                | 0.52            |
| MP:0009660                                          | abnormal induced retinal neovascularization                        | 0.52            |
| GO:0030140                                          | trans-Golgi network transport vesicle                              | 0.52            |
| ENSG00000135972                                     | MRPS9 PPI subnetwork                                               | 0.52            |
| ENSG00000100852                                     | ARHGAP5 PPI subnetwork                                             | 0.52            |
| GO:0005680                                          | anaphase-promoting complex                                         | 0.52            |
| ENSG00000171552                                     | BCL2L1 PPI subnetwork                                              | 0.52            |
| REACTOME_TELOMERE_C:STRAND_LAGGING_STRAND_SYNTHESIS | REACTOME_TELOMERE_C:STRAND_LAGGING_STRAND_SYNTHESIS                | 0.52            |
| MP:0005671                                          | abnormal response to transplant                                    | 0.52            |
| GO:0060284                                          | regulation of cell development                                     | 0.52            |
| GO:0005243                                          | gap junction channel activity                                      | 0.52            |
| MP:0005598                                          | decreased ventricle muscle contractility                           | 0.52            |
| GO:0007519                                          | skeletal muscle tissue development                                 | 0.52            |
| GO:0030155                                          | regulation of cell adhesion                                        | 0.52            |
| GO:0034707                                          | chloride channel complex                                           | 0.52            |
| GO:0016459                                          | myosin complex                                                     | 0.52            |
| GO:0006144                                          | purine base metabolic process                                      | 0.52            |
| MP:0000208                                          | decreased hematocrit                                               | 0.52            |
| GO:0048729                                          | tissue morphogenesis                                               | 0.52            |
| ENSG00000100994                                     | PYGB PPI subnetwork                                                | 0.52            |
| ENSG00000070770                                     | CSNK2A2 PPI subnetwork                                             | 0.52            |
| GO:0007597                                          | blood coagulation, intrinsic pathway                               | 0.52            |
| REACTOME_RECRUITMENT_OF_NUMA_TO_MITOTIC_CENTROSOMES | REACTOME_RECRUITMENT_OF_NUMA_TO_MITOTIC_CENTROSOMES                | 0.52            |
| KEGG_ANTIGEN_PROCESSING_AND_PRESENTATION            | KEGG_ANTIGEN_PROCESSING_AND_PRESENTATION                           | 0.52            |
| ENSG00000206234                                     | ENSG00000206234 PPI subnetwork                                     | 0.52            |
| ENSG00000204264                                     | PSMB8 PPI subnetwork                                               | 0.52            |
| ENSG00000206298                                     | PSMB8 PPI subnetwork                                               | 0.52            |
| GO:0009247                                          | glycolipid biosynthetic process                                    | 0.52            |





| Original gene set ID                                           | Original gene set description                                  | Nominal P value |
|----------------------------------------------------------------|----------------------------------------------------------------|-----------------|
| GO:0051324                                                     | prophase                                                       | 0.53            |
| GO:0031498                                                     | chromatin disassembly                                          | 0.53            |
| GO:0032986                                                     | protein-DNA complex disassembly                                | 0.53            |
| GO:0006337                                                     | nucleosome disassembly                                         | 0.53            |
| MP:0001394                                                     | circling                                                       | 0.53            |
| MP:0004542                                                     | impaired acrosome reaction                                     | 0.53            |
| ENSG00000077782                                                | FGFR1 PPI subnetwork                                           | 0.53            |
| ENSG00000006125                                                | AP2B1 PPI subnetwork                                           | 0.53            |
| MP:0002413                                                     | abnormal megakaryocyte progenitor cell morphology              | 0.53            |
| MP:0001006                                                     | abnormal retinal cone cell morphology                          | 0.53            |
| ENSG00000015479                                                | MATR3 PPI subnetwork                                           | 0.53            |
| ENSG000000198130                                               | HIBCH PPI subnetwork                                           | 0.53            |
| GO:0031058                                                     | positive regulation of histone modification                    | 0.53            |
| GO:0016050                                                     | vesicle organization                                           | 0.53            |
| MP:0000692                                                     | small spleen                                                   | 0.53            |
| ENSG000000144158                                               | ENSG000000144158 PPI subnetwork                                | 0.53            |
| GO:0030529                                                     | ribonucleoprotein complex                                      | 0.53            |
| ENSG00000069956                                                | MAPK6 PPI subnetwork                                           | 0.53            |
| REACTOME_PREFOLDIN_MEDIATED_TRANSFER_OF_SUBSTRATE_TO_CCTTRIC   | REACTOME_PREFOLDIN_MEDIATED_TRANSFER_OF_SUBSTRATE_TO_CCTTRIC   | 0.53            |
| REACTOME_COOPERATION_OF_PREFOLDIN_AND_TRICCT_IN_ACTIN_AND_TUBU | REACTOME_COOPERATION_OF_PREFOLDIN_AND_TRICCT_IN_ACTIN_AND_TUBU | 0.53            |
| ENSG000000169592                                               | INO80E PPI subnetwork                                          | 0.53            |
| ENSG000000162552                                               | WNT4 PPI subnetwork                                            | 0.53            |
| ENSG000000133027                                               | PEMT PPI subnetwork                                            | 0.53            |
| ENSG000000185627                                               | PSMD13 PPI subnetwork                                          | 0.53            |
| GO:0030424                                                     | axon                                                           | 0.53            |
| KEGG_FC_EPSILON_RI_SIGNALING_PATHWAY                           | KEGG_FC_EPSILON_RI_SIGNALING_PATHWAY                           | 0.53            |
| GO:0002755                                                     | MyD88-dependent toll-like receptor signaling pathway           | 0.53            |
| ENSG00000081052                                                | COL4A4 PPI subnetwork                                          | 0.53            |
| ENSG000000067596                                               | DHX8 PPI subnetwork                                            | 0.53            |
| MP:0000248                                                     | macrocytosis                                                   | 0.53            |
| REACTOME_GABA_SYNTHESIS_RELEASE_REUPTAKE_AND_DEGRADATION       | REACTOME_GABA_SYNTHESIS_RELEASE_REUPTAKE_AND_DEGRADATION       | 0.53            |
| ENSG000000160712                                               | IL6R PPI subnetwork                                            | 0.53            |
| GO:0005852                                                     | eukaryotic translation initiation factor 3 complex             | 0.53            |
| GO:0048598                                                     | embryonic morphogenesis                                        | 0.53            |
| ENSG000000001626                                               | CFTR PPI subnetwork                                            | 0.53            |
| ENSG000000005175                                               | RPAP3 PPI subnetwork                                           | 0.53            |
| GO:0042461                                                     | photoreceptor cell development                                 | 0.53            |
| GO:0007128                                                     | meiotic prophase I                                             | 0.53            |
| GO:0031063                                                     | regulation of histone deacetylation                            | 0.53            |
| GO:0001085                                                     | RNA polymerase II transcription factor binding                 | 0.53            |
| ENSG000000149557                                               | FEZ1 PPI subnetwork                                            | 0.53            |
| ENSG000000049540                                               | ELN PPI subnetwork                                             | 0.53            |
| ENSG000000206279                                               | DAXX PPI subnetwork                                            | 0.53            |
| ENSG000000206206                                               | DAXX PPI subnetwork                                            | 0.53            |
| ENSG000000204209                                               | DAXX PPI subnetwork                                            | 0.53            |
| GO:0090175                                                     | regulation of establishment of planar polarity                 | 0.53            |
| GO:0060071                                                     | Wnt receptor signaling pathway, planar cell polarity pathway   | 0.53            |
| GO:0001843                                                     | neural tube closure                                            | 0.53            |
| ENSG000000163877                                               | SNIP1 PPI subnetwork                                           | 0.53            |

| Original gene set ID                           | Original gene set description                           | Nominal P value |
|------------------------------------------------|---------------------------------------------------------|-----------------|
| ENSG00000153487                                | ING1 PPI subnetwork                                     | 0.53            |
| GO:0005261                                     | cation channel activity                                 | 0.53            |
| MP:0005330                                     | cardiomyopathy                                          | 0.53            |
| ENSG00000134245                                | WNT2B PPI subnetwork                                    | 0.53            |
| REACTOME_ANTIGEN_PROCESSING:CROSS_PRESENTATION | REACTOME_ANTIGEN_PROCESSING:CROSS_PRESENTATION          | 0.53            |
| GO:0060325                                     | face morphogenesis                                      | 0.53            |
| MP:0004485                                     | increased response of heart to induced stress           | 0.53            |
| ENSG00000185637                                | ENSG00000185637 PPI subnetwork                          | 0.53            |
| MP:0000131                                     | abnormal long bone epiphysis morphology                 | 0.53            |
| ENSG00000130699                                | TAF4 PPI subnetwork                                     | 0.53            |
| ENSG00000211762                                | ENSG00000211762 PPI subnetwork                          | 0.53            |
| GO:0006732                                     | coenzyme metabolic process                              | 0.53            |
| ENSG00000075340                                | ADD2 PPI subnetwork                                     | 0.53            |
| ENSG00000116641                                | DOCK7 PPI subnetwork                                    | 0.53            |
| ENSG00000137752                                | CASP1 PPI subnetwork                                    | 0.53            |
| ENSG00000091106                                | NLRC4 PPI subnetwork                                    | 0.53            |
| MP:0000458                                     | abnormal mandible morphology                            | 0.53            |
| ENSG00000000938                                | FGR PPI subnetwork                                      | 0.53            |
| ENSG00000151576                                | QTRTD1 PPI subnetwork                                   | 0.53            |
| ENSG00000161681                                | SHANK1 PPI subnetwork                                   | 0.53            |
| MP:0002428                                     | abnormal semicircular canal morphology                  | 0.53            |
| ENSG00000118137                                | APOA1 PPI subnetwork                                    | 0.53            |
| ENSG00000215756                                | ENSG00000215756 PPI subnetwork                          | 0.53            |
| MP:0004322                                     | abnormal strobila morphology                            | 0.53            |
| MP:0008808                                     | decreased spleen iron level                             | 0.53            |
| MP:0004409                                     | abnormal crista ampullaris neuroepithelium morphology   | 0.53            |
| MP:0002500                                     | granulomatous inflammation                              | 0.53            |
| GO:0000502                                     | proteasome complex                                      | 0.53            |
| ENSG00000198042                                | MAK16 PPI subnetwork                                    | 0.53            |
| REACTOME_SIGNALING_BY_SCF:KIT                  | REACTOME_SIGNALING_BY_SCF:KIT                           | 0.53            |
| MP:0005322                                     | abnormal serotonin level                                | 0.53            |
| ENSG00000121083                                | DYNLL2 PPI subnetwork                                   | 0.53            |
| MP:0008585                                     | absent photoreceptor outer segment                      | 0.53            |
| MP:0004875                                     | increased mean systemic arterial blood pressure         | 0.53            |
| MP:0005122                                     | increased circulating thyroid-stimulating hormone level | 0.53            |
| ENSG00000100129                                | EIF3L PPI subnetwork                                    | 0.53            |
| ENSG00000166401                                | SERPINB8 PPI subnetwork                                 | 0.53            |
| GO:0000279                                     | M phase                                                 | 0.53            |
| ENSG00000179218                                | CALR PPI subnetwork                                     | 0.53            |
| REACTOME_FGFR1C_LIGAND_BINDING_AND_ACTIVATION  | REACTOME_FGFR1C_LIGAND_BINDING_AND_ACTIVATION           | 0.53            |
| ENSG00000163520                                | FBLN2 PPI subnetwork                                    | 0.53            |
| ENSG00000146701                                | MDH2 PPI subnetwork                                     | 0.53            |
| GO:0051188                                     | cofactor biosynthetic process                           | 0.53            |
| GO:0044275                                     | cellular carbohydrate catabolic process                 | 0.53            |
| REACTOME_SIGNALING_BY_VEGF                     | REACTOME_SIGNALING_BY_VEGF                              | 0.54            |
| REACTOME_VEGF_LIGAND:RECEPTOR_INTERACTIONS     | REACTOME_VEGF_LIGAND:RECEPTOR_INTERACTIONS              | 0.54            |
| ENSG00000162511                                | LAPTM5 PPI subnetwork                                   | 0.54            |
| GO:0001837                                     | epithelial to mesenchymal transition                    | 0.54            |
| MP:0010018                                     | pulmonary vascular congestion                           | 0.54            |

| Original gene set ID                                            | Original gene set description                                   | Nominal P value |
|-----------------------------------------------------------------|-----------------------------------------------------------------|-----------------|
| GO:0051904                                                      | pigment granule transport                                       | 0.54            |
| GO:0001649                                                      | osteoblast differentiation                                      | 0.54            |
| ENSG000000094880                                                | CDC23 PPI subnetwork                                            | 0.54            |
| GO:0004540                                                      | ribonuclease activity                                           | 0.54            |
| REACTOME_SYNTHESIS_SECRETION_AND_DEACYLATION_OF_GHRELIN         | REACTOME_SYNTHESIS_SECRETION_AND_DEACYLATION_OF_GHRELIN         | 0.54            |
| MP:0002786                                                      | abnormal Leydig cell morphology                                 | 0.54            |
| MP:0000925                                                      | abnormal floor plate morphology                                 | 0.54            |
| ENSG00000164494                                                 | PDSS2 PPI subnetwork                                            | 0.54            |
| REACTOME_INTERLEUKIN_RECEPTOR_SHC_SIGNALING                     | REACTOME_INTERLEUKIN_RECEPTOR_SHC_SIGNALING                     | 0.54            |
| GO:0071173                                                      | spindle assembly checkpoint                                     | 0.54            |
| REACTOME_ACTIVATION_OF_THE_AP:1_FAMILY_OF_TRANSCRIPTION_FACTORS | REACTOME_ACTIVATION_OF_THE_AP:1_FAMILY_OF_TRANSCRIPTION_FACTORS | 0.54            |
| MP:0002908                                                      | delayed wound healing                                           | 0.54            |
| GO:0007269                                                      | neurotransmitter secretion                                      | 0.54            |
| ENSG00000124802                                                 | EEF1E1 PPI subnetwork                                           | 0.54            |
| GO:0045121                                                      | membrane raft                                                   | 0.54            |
| REACTOME_FGFR1_LIGAND_BINDING_AND_ACTIVATION                    | REACTOME_FGFR1_LIGAND_BINDING_AND_ACTIVATION                    | 0.54            |
| GO:0019433                                                      | triglyceride catabolic process                                  | 0.54            |
| MP:0001302                                                      | eyelids open at birth                                           | 0.54            |
| ENSG00000198062                                                 | POTEH PPI subnetwork                                            | 0.54            |
| ENSG00000164609                                                 | SLU7 PPI subnetwork                                             | 0.54            |
| GO:0045926                                                      | negative regulation of growth                                   | 0.54            |
| REACTOME_METABOLISM_OF_NUCLEOTIDES                              | REACTOME_METABOLISM_OF_NUCLEOTIDES                              | 0.54            |
| ENSG00000079785                                                 | DDX1 PPI subnetwork                                             | 0.54            |
| MP:0005465                                                      | abnormal T-helper 1 physiology                                  | 0.54            |
| KEGG_ALPHA_LINOLENIC_ACID_METABOLISM                            | KEGG_ALPHA_LINOLENIC_ACID_METABOLISM                            | 0.54            |
| GO:0035150                                                      | regulation of tube size                                         | 0.54            |
| KEGG_LINOLEIC_ACID_METABOLISM                                   | KEGG_LINOLEIC_ACID_METABOLISM                                   | 0.54            |
| ENSG00000099942                                                 | CRKL PPI subnetwork                                             | 0.54            |
| MP:0006000                                                      | abnormal corneal epithelium morphology                          | 0.54            |
| ENSG00000101868                                                 | POLA1 PPI subnetwork                                            | 0.54            |
| GO:0009112                                                      | nucleobase metabolic process                                    | 0.54            |
| ENSG00000039650                                                 | PNKP PPI subnetwork                                             | 0.54            |
| ENSG00000174827                                                 | PDZK1 PPI subnetwork                                            | 0.54            |
| KEGG_LEISHMANIA_INFECTION                                       | KEGG_LEISHMANIA_INFECTION                                       | 0.54            |
| KEGG_OOCYTE_MEIOSIS                                             | KEGG_OOCYTE_MEIOSIS                                             | 0.54            |
| GO:0009968                                                      | negative regulation of signal transduction                      | 0.54            |
| ENSG00000120885                                                 | CLU PPI subnetwork                                              | 0.54            |
| MP:0003634                                                      | abnormal glial cell morphology                                  | 0.54            |
| ENSG00000165417                                                 | GTF2A1 PPI subnetwork                                           | 0.54            |
| ENSG00000172115                                                 | CYCS PPI subnetwork                                             | 0.54            |
| GO:0006891                                                      | intra-Golgi vesicle-mediated transport                          | 0.54            |
| MP:0002843                                                      | decreased systemic arterial blood pressure                      | 0.54            |
| MP:0001524                                                      | impaired limb coordination                                      | 0.54            |
| MP:0005311                                                      | abnormal circulating amino acid level                           | 0.54            |
| ENSG00000075673                                                 | ATP12A PPI subnetwork                                           | 0.54            |
| GO:0008543                                                      | fibroblast growth factor receptor signaling pathway             | 0.54            |
| MP:0003936                                                      | abnormal reproductive system development                        | 0.54            |
| MP:0002465                                                      | abnormal eosinophil physiology                                  | 0.54            |
| ENSG00000119535                                                 | CSF3R PPI subnetwork                                            | 0.54            |

| Original gene set ID                      | Original gene set description                                  | Nominal P value |
|-------------------------------------------|----------------------------------------------------------------|-----------------|
| ENSG00000139618                           | BRCA2 PPI subnetwork                                           | 0.54            |
| ENSG00000100239                           | PPP6R2 PPI subnetwork                                          | 0.54            |
| ENSG00000112159                           | MDN1 PPI subnetwork                                            | 0.54            |
| ENSG00000100109                           | TFIP11 PPI subnetwork                                          | 0.54            |
| ENSG00000187990                           | HIST1H2BG PPI subnetwork                                       | 0.54            |
| ENSG00000168242                           | HIST1H2BI PPI subnetwork                                       | 0.54            |
| ENSG00000180596                           | HIST1H2BC PPI subnetwork                                       | 0.54            |
| ENSG00000197846                           | HIST1H2BF PPI subnetwork                                       | 0.54            |
| ENSG00000126261                           | UBA2 PPI subnetwork                                            | 0.54            |
| ENSG0000011485                            | PPP5C PPI subnetwork                                           | 0.54            |
| ENSG00000101146                           | RAE1 PPI subnetwork                                            | 0.54            |
| ENSG00000163810                           | TGM4 PPI subnetwork                                            | 0.54            |
| ENSG00000142208                           | AKT1 PPI subnetwork                                            | 0.54            |
| ENSG00000170312                           | CDK1 PPI subnetwork                                            | 0.54            |
| KEGG_PORPHYRIN_AND_CHLOROPHYLL_METABOLISM | KEGG_PORPHYRIN_AND_CHLOROPHYLL_METABOLISM                      | 0.54            |
| GO:0010948                                | negative regulation of cell cycle process                      | 0.54            |
| GO:0070555                                | response to interleukin-1                                      | 0.54            |
| GO:0009982                                | pseudouridine synthase activity                                | 0.54            |
| GO:0030934                                | anchoring collagen                                             | 0.54            |
| GO:0005253                                | anion channel activity                                         | 0.54            |
| GO:0019841                                | retinol binding                                                | 0.54            |
| GO:0006885                                | regulation of pH                                               | 0.54            |
| MP:0002887                                | decreased susceptibility to pharmacologically induced seizures | 0.54            |
| ENSG00000163069                           | SGCB PPI subnetwork                                            | 0.54            |
| MP:0008807                                | increased liver iron level                                     | 0.54            |
| GO:0043202                                | lysosomal lumen                                                | 0.54            |
| ENSG00000197903                           | HIST1H2BK PPI subnetwork                                       | 0.54            |
| ENSG00000164086                           | DUSP7 PPI subnetwork                                           | 0.54            |
| GO:0008287                                | protein serine/threonine phosphatase complex                   | 0.54            |
| ENSG00000174989                           | FBXW8 PPI subnetwork                                           | 0.54            |
| GO:0034483                                | heparan sulfate sulfotransferase activity                      | 0.54            |
| ENSG00000177879                           | AP3S1 PPI subnetwork                                           | 0.54            |
| GO:0021549                                | cerebellum development                                         | 0.54            |
| GO:0008175                                | tRNA methyltransferase activity                                | 0.54            |
| KEGG_GRAFT_VERSUS_HOST_DISEASE            | KEGG_GRAFT_VERSUS_HOST_DISEASE                                 | 0.54            |
| GO:0031577                                | spindle checkpoint                                             | 0.54            |
| GO:0008366                                | axon ensheathment                                              | 0.54            |
| GO:0007272                                | ensheathment of neurons                                        | 0.54            |
| GO:0016339                                | calcium-dependent cell-cell adhesion                           | 0.54            |
| ENSG00000129993                           | CBFA2T3 PPI subnetwork                                         | 0.54            |
| MP:0001363                                | increased anxiety-related response                             | 0.54            |
| ENSG00000126067                           | PSMB2 PPI subnetwork                                           | 0.54            |
| ENSG00000066933                           | MYO9A PPI subnetwork                                           | 0.54            |
| GO:0071855                                | neuropeptide receptor binding                                  | 0.54            |
| REACTOME_SIGNAL_AMPLIFICATION             | REACTOME_SIGNAL_AMPLIFICATION                                  | 0.54            |
| ENSG0000006468                            | ETV1 PPI subnetwork                                            | 0.54            |
| GO:0071295                                | cellular response to vitamin                                   | 0.54            |
| ENSG00000111348                           | ARHGDI1 PPI subnetwork                                         | 0.54            |
| ENSG00000143437                           | ARNT PPI subnetwork                                            | 0.54            |

| Original gene set ID                         | Original gene set description                                           | Nominal P value |
|----------------------------------------------|-------------------------------------------------------------------------|-----------------|
| ENSG00000160255                              | ITGB2 PPI subnetwork                                                    | 0.54            |
| GO:0071941                                   | nitrogen cycle metabolic process                                        | 0.54            |
| MP:0001270                                   | distended abdomen                                                       | 0.54            |
| ENSG00000180185                              | FAHD1 PPI subnetwork                                                    | 0.54            |
| MP:0000460                                   | mandible hypoplasia                                                     | 0.54            |
| KEGG_PROXIMAL_TUBULE_BICARBONATE_RECLAMATION | KEGG_PROXIMAL_TUBULE_BICARBONATE_RECLAMATION                            | 0.54            |
| ENSG00000184117                              | NIPSNAP1 PPI subnetwork                                                 | 0.54            |
| ENSG00000146232                              | NFKBIE PPI subnetwork                                                   | 0.54            |
| MP:0005104                                   | abnormal tarsal bone morphology                                         | 0.54            |
| GO:0050795                                   | regulation of behavior                                                  | 0.54            |
| MP:0004753                                   | abnormal miniature excitatory postsynaptic currents                     | 0.54            |
| ENSG00000113810                              | SMC4 PPI subnetwork                                                     | 0.55            |
| ENSG00000130706                              | ADRM1 PPI subnetwork                                                    | 0.55            |
| MP:0001489                                   | decreased startle reflex                                                | 0.55            |
| MP:0001762                                   | polyuria                                                                | 0.55            |
| ENSG00000140600                              | SH3GL3 PPI subnetwork                                                   | 0.55            |
| GO:0045737                                   | positive regulation of cyclin-dependent protein kinase activity         | 0.55            |
| ENSG00000096063                              | SRPK1 PPI subnetwork                                                    | 0.55            |
| ENSG00000120087                              | HOXB7 PPI subnetwork                                                    | 0.55            |
| MP:0002123                                   | abnormal hematopoiesis                                                  | 0.55            |
| ENSG00000177485                              | ZBTB33 PPI subnetwork                                                   | 0.55            |
| MP:0005466                                   | abnormal T-helper 2 physiology                                          | 0.55            |
| GO:0007130                                   | synaptonemal complex assembly                                           | 0.55            |
| GO:0010562                                   | positive regulation of phosphorus metabolic process                     | 0.55            |
| GO:0045937                                   | positive regulation of phosphate metabolic process                      | 0.55            |
| GO:0046634                                   | regulation of alpha-beta T cell activation                              | 0.55            |
| GO:0044057                                   | regulation of system process                                            | 0.55            |
| GO:0061077                                   | chaperone-mediated protein folding                                      | 0.55            |
| GO:0005507                                   | copper ion binding                                                      | 0.55            |
| ENSG00000175467                              | SART1 PPI subnetwork                                                    | 0.55            |
| GO:0008633                                   | activation of pro-apoptotic gene products                               | 0.55            |
| GO:0019887                                   | protein kinase regulator activity                                       | 0.55            |
| GO:0030902                                   | hindbrain development                                                   | 0.55            |
| GO:0005267                                   | potassium channel activity                                              | 0.55            |
| GO:0032535                                   | regulation of cellular component size                                   | 0.55            |
| MP:0009790                                   | decreased susceptibility to viral infection induced morbidity/mortality | 0.55            |
| GO:0030867                                   | rough endoplasmic reticulum membrane                                    | 0.55            |
| GO:0043603                                   | cellular amide metabolic process                                        | 0.55            |
| GO:0046631                                   | alpha-beta T cell activation                                            | 0.55            |
| MP:0003606                                   | kidney failure                                                          | 0.55            |
| MP:0001523                                   | impaired righting response                                              | 0.55            |
| GO:0032320                                   | positive regulation of Ras GTPase activity                              | 0.55            |
| ENSG00000084234                              | APLP2 PPI subnetwork                                                    | 0.55            |
| GO:0007398                                   | ectoderm development                                                    | 0.55            |
| ENSG00000125378                              | BMP4 PPI subnetwork                                                     | 0.55            |
| ENSG00000165059                              | PRKACG PPI subnetwork                                                   | 0.55            |
| GO:0045086                                   | positive regulation of interleukin-2 biosynthetic process               | 0.55            |
| MP:0003890                                   | abnormal embryonic-extraembryonic boundary morphology                   | 0.55            |
| ENSG00000198791                              | CNOT7 PPI subnetwork                                                    | 0.55            |



| Original gene set ID                           | Original gene set description                              | Nominal P value |
|------------------------------------------------|------------------------------------------------------------|-----------------|
| ENSG00000104419                                | NDRG1 PPI subnetwork                                       | 0.55            |
| MP:0000245                                     | abnormal erythropoiesis                                    | 0.55            |
| ENSG00000117601                                | SERPINC1 PPI subnetwork                                    | 0.55            |
| GO:0060485                                     | mesenchyme development                                     | 0.55            |
| GO:0042575                                     | DNA polymerase complex                                     | 0.55            |
| MP:0001120                                     | abnormal uterus morphology                                 | 0.55            |
| ENSG00000108055                                | SMC3 PPI subnetwork                                        | 0.55            |
| ENSG00000102974                                | CTCF PPI subnetwork                                        | 0.55            |
| MP:0004939                                     | abnormal B cell morphology                                 | 0.55            |
| GO:0005100                                     | Rho GTPase activator activity                              | 0.55            |
| MP:0008528                                     | polycystic kidney                                          | 0.55            |
| MP:0009862                                     | abnormal aorta elastic tissue morphology                   | 0.55            |
| MP:0004876                                     | decreased mean systemic arterial blood pressure            | 0.55            |
| GO:0007017                                     | microtubule-based process                                  | 0.55            |
| GO:0003007                                     | heart morphogenesis                                        | 0.55            |
| ENSG00000111262                                | KCNA1 PPI subnetwork                                       | 0.56            |
| MP:0005159                                     | azoospermia                                                | 0.56            |
| ENSG00000180628                                | PCGF5 PPI subnetwork                                       | 0.56            |
| ENSG00000177469                                | PTRF PPI subnetwork                                        | 0.56            |
| ENSG00000122965                                | RBM19 PPI subnetwork                                       | 0.56            |
| GO:0046658                                     | anchored to plasma membrane                                | 0.56            |
| GO:0042625                                     | ATPase activity, coupled to transmembrane movement of ions | 0.56            |
| ENSG00000162946                                | DISC1 PPI subnetwork                                       | 0.56            |
| ENSG00000085231                                | TAF9 PPI subnetwork                                        | 0.56            |
| ENSG00000069431                                | ABCC9 PPI subnetwork                                       | 0.56            |
| GO:0006182                                     | cGMP biosynthetic process                                  | 0.56            |
| ENSG00000123374                                | CDK2 PPI subnetwork                                        | 0.56            |
| REACTOME_CYTOSOLIC_TRNA_AMINOACYLATION         | REACTOME_CYTOSOLIC_TRNA_AMINOACYLATION                     | 0.56            |
| REACTOME_SCF5K2:MEDIATED_DEGRADATION_OF_P27P21 | REACTOME_SCF5K2:MEDIATED_DEGRADATION_OF_P27P21             | 0.56            |
| MP:0011100                                     | complete preweaning lethality                              | 0.56            |
| MP:0002176                                     | increased brain weight                                     | 0.56            |
| REACTOME_CGMP_EFFECTS                          | REACTOME_CGMP_EFFECTS                                      | 0.56            |
| ENSG00000092203                                | TOX4 PPI subnetwork                                        | 0.56            |
| ENSG00000165527                                | ARF6 PPI subnetwork                                        | 0.56            |
| ENSG00000067704                                | IARS2 PPI subnetwork                                       | 0.56            |
| GO:0090312                                     | positive regulation of protein deacetylation               | 0.56            |
| GO:2000027                                     | regulation of organ morphogenesis                          | 0.56            |
| GO:0045177                                     | apical part of cell                                        | 0.56            |
| MP:0004779                                     | abnormal production of surfactant                          | 0.56            |
| ENSG00000106976                                | DNM1 PPI subnetwork                                        | 0.56            |
| ENSG00000106348                                | IMPDH1 PPI subnetwork                                      | 0.56            |
| ENSG00000174446                                | SNAPC5 PPI subnetwork                                      | 0.56            |
| ENSG00000167751                                | KLK2 PPI subnetwork                                        | 0.56            |
| ENSG00000102572                                | STK24 PPI subnetwork                                       | 0.56            |
| GO:0003950                                     | NAD+ ADP-ribosyltransferase activity                       | 0.56            |
| ENSG00000159840                                | ZYX PPI subnetwork                                         | 0.56            |
| ENSG00000105664                                | COMP PPI subnetwork                                        | 0.56            |
| ENSG00000165684                                | SNAPC4 PPI subnetwork                                      | 0.56            |
| GO:0061387                                     | regulation of extent of cell growth                        | 0.56            |



| Original gene set ID                                       | Original gene set description                                                        | Nominal P value |
|------------------------------------------------------------|--------------------------------------------------------------------------------------|-----------------|
| REACTOME_MITOTIC_SPINDLE_CHECKPOINT                        | REACTOME_MITOTIC_SPINDLE_CHECKPOINT                                                  | 0.56            |
| REACTOME_UNBLOCKING_OF_NMDA_RECEPTOR_Glutamate_Binding_And | REACTOME_UNBLOCKING_OF_NMDA_RECEPTOR_Glutamate_Binding_And_AC                        | 0.56            |
| MP:0002621                                                 | delayed neural tube closure                                                          | 0.56            |
| ENSG00000101558                                            | VAPA PPI subnetwork                                                                  | 0.56            |
| GO:0007040                                                 | lysosome organization                                                                | 0.56            |
| ENSG00000097046                                            | CDC7 PPI subnetwork                                                                  | 0.56            |
| MP:0008703                                                 | decreased interleukin-5 secretion                                                    | 0.56            |
| MP:0004486                                                 | decreased response of heart to induced stress                                        | 0.56            |
| ENSG00000101189                                            | C20orf20 PPI subnetwork                                                              | 0.56            |
| REACTOME_G1S:SPECIFIC_TRANSCRIPTION                        | REACTOME_G1S:SPECIFIC_TRANSCRIPTION                                                  | 0.56            |
| ENSG00000099341                                            | PSMD8 PPI subnetwork                                                                 | 0.56            |
| GO:0043534                                                 | blood vessel endothelial cell migration                                              | 0.56            |
| ENSG00000106211                                            | HSPB1 PPI subnetwork                                                                 | 0.56            |
| ENSG00000198380                                            | GFPT1 PPI subnetwork                                                                 | 0.56            |
| GO:0005254                                                 | chloride channel activity                                                            | 0.56            |
| ENSG00000171867                                            | PRNP PPI subnetwork                                                                  | 0.56            |
| GO:0032368                                                 | regulation of lipid transport                                                        | 0.56            |
| ENSG00000206232                                            | ENSG00000206232 PPI subnetwork                                                       | 0.56            |
| ENSG00000204261                                            | ENSG00000204261 PPI subnetwork                                                       | 0.56            |
| ENSG00000206296                                            | ENSG00000206296 PPI subnetwork                                                       | 0.56            |
| GO:0016776                                                 | phosphotransferase activity, phosphate group as acceptor                             | 0.56            |
| ENSG00000129559                                            | NEDD8 PPI subnetwork                                                                 | 0.56            |
| ENSG00000152661                                            | GJA1 PPI subnetwork                                                                  | 0.56            |
| GO:0016709                                                 | oxidoreductase activity, acting on paired donors, with incorporation or reduction of | 0.56            |
| GO:0035050                                                 | embryonic heart tube development                                                     | 0.56            |
| ENSG00000175084                                            | DES PPI subnetwork                                                                   | 0.56            |
| GO:0007588                                                 | excretion                                                                            | 0.56            |
| GO:0050770                                                 | regulation of axonogenesis                                                           | 0.56            |
| ENSG00000114251                                            | WNT5A PPI subnetwork                                                                 | 0.56            |
| MP:0000111                                                 | cleft palate                                                                         | 0.56            |
| ENSG00000155561                                            | NUP205 PPI subnetwork                                                                | 0.56            |
| ENSG00000198018                                            | ENTPD7 PPI subnetwork                                                                | 0.56            |
| REACTOME_P2Y_RECEPTORS                                     | REACTOME_P2Y_RECEPTORS                                                               | 0.56            |
| GO:0043498                                                 | cell surface binding                                                                 | 0.56            |
| MP:0008189                                                 | increased transitional stage B cell number                                           | 0.56            |
| GO:0007059                                                 | chromosome segregation                                                               | 0.56            |
| GO:0008023                                                 | transcription elongation factor complex                                              | 0.56            |
| MP:0005324                                                 | ascites                                                                              | 0.56            |
| KEGG_FRUCTOSE_AND_MANNANOSE_METABOLISM                     | KEGG_FRUCTOSE_AND_MANNANOSE_METABOLISM                                               | 0.56            |
| ENSG00000167930                                            | ITFG3 PPI subnetwork                                                                 | 0.56            |
| GO:0016514                                                 | SWI/SNF complex                                                                      | 0.56            |
| GO:0016055                                                 | Wnt receptor signaling pathway                                                       | 0.56            |
| MP:0005334                                                 | abnormal fat pad morphology                                                          | 0.56            |
| ENSG00000108379                                            | WNT3 PPI subnetwork                                                                  | 0.56            |
| MP:0005464                                                 | abnormal platelet physiology                                                         | 0.56            |
| GO:0016064                                                 | immunoglobulin mediated immune response                                              | 0.56            |
| GO:0032609                                                 | interferon-gamma production                                                          | 0.56            |
| GO:0035162                                                 | embryonic hemopoiesis                                                                | 0.56            |
| ENSG00000103168                                            | TAF1C PPI subnetwork                                                                 | 0.56            |

| Original gene set ID                                        | Original gene set description                                  | Nominal P value |
|-------------------------------------------------------------|----------------------------------------------------------------|-----------------|
| MP:0006269                                                  | abnormal mammary gland growth during pregnancy                 | 0.56            |
| REACTOME_PHOSPHORYLATION_OF_THE_APCC                        | REACTOME_PHOSPHORYLATION_OF_THE_APCC                           | 0.56            |
| MP:0004090                                                  | abnormal sarcomere morphology                                  | 0.56            |
| ENSG00000172794                                             | RAB37 PPI subnetwork                                           | 0.56            |
| GO:0042733                                                  | embryonic digit morphogenesis                                  | 0.56            |
| REACTOME_DNA_REPLICATION_PRE:INITIATION                     | REACTOME_DNA_REPLICATION_PRE:INITIATION                        | 0.56            |
| REACTOME_MG1_TRANSITION                                     | REACTOME_MG1_TRANSITION                                        | 0.56            |
| ENSG00000134982                                             | APC PPI subnetwork                                             | 0.56            |
| GO:0045980                                                  | negative regulation of nucleotide metabolic process            | 0.56            |
| GO:0008483                                                  | transaminase activity                                          | 0.56            |
| MP:0001714                                                  | absent trophoblast giant cells                                 | 0.56            |
| MP:0002950                                                  | abnormal neural crest cell migration                           | 0.56            |
| ENSG00000172116                                             | CD8B PPI subnetwork                                            | 0.56            |
| ENSG00000111186                                             | WNT5B PPI subnetwork                                           | 0.56            |
| GO:0015485                                                  | cholesterol binding                                            | 0.56            |
| ENSG00000130414                                             | NDUFA10 PPI subnetwork                                         | 0.56            |
| GO:0003197                                                  | endocardial cushion development                                | 0.56            |
| GO:0008016                                                  | regulation of heart contraction                                | 0.56            |
| ENSG00000131238                                             | PPT1 PPI subnetwork                                            | 0.56            |
| MP:0009331                                                  | absent primitive node                                          | 0.56            |
| GO:0032755                                                  | positive regulation of interleukin-6 production                | 0.56            |
| ENSG00000198925                                             | ATG9A PPI subnetwork                                           | 0.57            |
| MP:0005326                                                  | abnormal podocyte morphology                                   | 0.57            |
| GO:0005506                                                  | iron ion binding                                               | 0.57            |
| ENSG00000123737                                             | EXOSC9 PPI subnetwork                                          | 0.57            |
| GO:0070646                                                  | protein modification by small protein removal                  | 0.57            |
| ENSG0000010030                                              | ETV7 PPI subnetwork                                            | 0.57            |
| ENSG00000197321                                             | SVIL PPI subnetwork                                            | 0.57            |
| ENSG00000197697                                             | HIST1H2BE PPI subnetwork                                       | 0.57            |
| ENSG00000138741                                             | TRPC3 PPI subnetwork                                           | 0.57            |
| GO:0001710                                                  | mesodermal cell fate commitment                                | 0.57            |
| ENSG00000124789                                             | NUP153 PPI subnetwork                                          | 0.57            |
| GO:0030100                                                  | regulation of endocytosis                                      | 0.57            |
| GO:0051325                                                  | interphase                                                     | 0.57            |
| ENSG00000092964                                             | DPYSL2 PPI subnetwork                                          | 0.57            |
| GO:0015370                                                  | solute:sodium symporter activity                               | 0.57            |
| GO:0004576                                                  | oligosaccharyl transferase activity                            | 0.57            |
| REACTOME_VPU_MEDIATED_DEGRADATION_OF_CD4                    | REACTOME_VPU_MEDIATED_DEGRADATION_OF_CD4                       | 0.57            |
| KEGG_HOMOLOGOUS_RECOMBINATION                               | KEGG_HOMOLOGOUS_RECOMBINATION                                  | 0.57            |
| GO:0016010                                                  | dystrophin-associated glycoprotein complex                     | 0.57            |
| REACTOME_CREB_PHOSPHORYLATION_THROUGH_THE_ACTIVATION_OF_CAM | REACTOME_CREB_PHOSPHORYLATION_THROUGH_THE_ACTIVATION_OF_CAMKII | 0.57            |
| GO:0042770                                                  | signal transduction in response to DNA damage                  | 0.57            |
| MP:0000913                                                  | abnormal brain development                                     | 0.57            |
| ENSG00000136754                                             | ABI1 PPI subnetwork                                            | 0.57            |
| GO:0042692                                                  | muscle cell differentiation                                    | 0.57            |
| REACTOME_KINESINS                                           | REACTOME_KINESINS                                              | 0.57            |
| ENSG00000178607                                             | ERN1 PPI subnetwork                                            | 0.57            |
| GO:0042805                                                  | actinin binding                                                | 0.57            |
| GO:0006297                                                  | nucleotide-excision repair, DNA gap filling                    | 0.57            |

| Original gene set ID                            | Original gene set description                                       | Nominal P value |
|-------------------------------------------------|---------------------------------------------------------------------|-----------------|
| ENSG00000122884                                 | P4HA1 PPI subnetwork                                                | 0.57            |
| GO:0003143                                      | embryonic heart tube morphogenesis                                  | 0.57            |
| ENSG00000153234                                 | NR4A2 PPI subnetwork                                                | 0.57            |
| ENSG00000135363                                 | LMO2 PPI subnetwork                                                 | 0.57            |
| GO:0019894                                      | kinesin binding                                                     | 0.57            |
| GO:0042440                                      | pigment metabolic process                                           | 0.57            |
| GO:0060538                                      | skeletal muscle organ development                                   | 0.57            |
| GO:0006275                                      | regulation of DNA replication                                       | 0.57            |
| ENSG00000100079                                 | LGALS2 PPI subnetwork                                               | 0.57            |
| REACTOME_ACTIVATION_OF_CHAPERONES_BY_ATF6:ALPHA | REACTOME_ACTIVATION_OF_CHAPERONES_BY_ATF6:ALPHA                     | 0.57            |
| GO:0016604                                      | nuclear body                                                        | 0.57            |
| MP:0002199                                      | abnormal brain commissure morphology                                | 0.57            |
| ENSG00000165996                                 | PTPLA PPI subnetwork                                                | 0.57            |
| GO:0004115                                      | 3',5'-cyclic-AMP phosphodiesterase activity                         | 0.57            |
| ENSG00000175792                                 | RUVBL1 PPI subnetwork                                               | 0.57            |
| ENSG00000111752                                 | PHC1 PPI subnetwork                                                 | 0.57            |
| MP:0002085                                      | abnormal embryonic tissue morphology                                | 0.57            |
| ENSG00000114982                                 | KANSL3 PPI subnetwork                                               | 0.57            |
| GO:0010745                                      | negative regulation of macrophage derived foam cell differentiation | 0.57            |
| GO:0007094                                      | mitotic cell cycle spindle assembly checkpoint                      | 0.57            |
| ENSG00000108823                                 | SGCA PPI subnetwork                                                 | 0.57            |
| GO:0008395                                      | steroid hydroxylase activity                                        | 0.57            |
| GO:0001754                                      | eye photoreceptor cell differentiation                              | 0.57            |
| GO:0032393                                      | MHC class I receptor activity                                       | 0.57            |
| REACTOME_CELL_CYCLE_MITOTIC                     | REACTOME_CELL_CYCLE_MITOTIC                                         | 0.57            |
| GO:0030193                                      | regulation of blood coagulation                                     | 0.57            |
| GO:0019239                                      | deaminase activity                                                  | 0.57            |
| MP:0005341                                      | decreased susceptibility to atherosclerosis                         | 0.57            |
| ENSG00000102054                                 | RBBP7 PPI subnetwork                                                | 0.57            |
| MP:0001182                                      | lung hemorrhage                                                     | 0.57            |
| GO:0021904                                      | dorsal/ventral neural tube patterning                               | 0.57            |
| ENSG00000166478                                 | ZNF143 PPI subnetwork                                               | 0.57            |
| KEGG_BASAL_TRANSCRIPTION_FACTORS                | KEGG_BASAL_TRANSCRIPTION_FACTORS                                    | 0.57            |
| GO:0048566                                      | embryonic digestive tract development                               | 0.57            |
| MP:0000788                                      | abnormal cerebral cortex morphology                                 | 0.57            |
| ENSG00000144285                                 | SCN1A PPI subnetwork                                                | 0.57            |
| MP:0000562                                      | polydactyly                                                         | 0.57            |
| REACTOME_ION_TRANSPORT_BY_P:TYPE_ATPASES        | REACTOME_ION_TRANSPORT_BY_P:TYPE_ATPASES                            | 0.57            |
| ENSG00000105287                                 | PRKD2 PPI subnetwork                                                | 0.57            |
| ENSG00000181610                                 | MRPS23 PPI subnetwork                                               | 0.57            |
| ENSG00000116478                                 | HDAC1 PPI subnetwork                                                | 0.57            |
| GO:0030901                                      | midbrain development                                                | 0.57            |
| ENSG00000158517                                 | NCF1 PPI subnetwork                                                 | 0.57            |
| ENSG00000152818                                 | UTRN PPI subnetwork                                                 | 0.57            |
| MP:0008076                                      | abnormal CD4-positive T cell differentiation                        | 0.57            |
| KEGG_LYSINE_DEGRADATION                         | KEGG_LYSINE_DEGRADATION                                             | 0.57            |
| MP:0011346                                      | renal tubule atrophy                                                | 0.57            |
| ENSG00000142599                                 | REER PPI subnetwork                                                 | 0.57            |
| REACTOME_METABOLISM_OF_NON:CODING_RNA           | REACTOME_METABOLISM_OF_NON:CODING_RNA                               | 0.57            |



| Original gene set ID                                           | Original gene set description                                    | Nominal P value |
|----------------------------------------------------------------|------------------------------------------------------------------|-----------------|
| MP:0004405                                                     | absent cochlear hair cells                                       | 0.58            |
| GO:0043583                                                     | ear development                                                  | 0.58            |
| MP:0004261                                                     | abnormal embryonic neuroepithelium morphology                    | 0.58            |
| REACTOME_ANTIGEN_PROCESSING_UBIQUITINATION__PROTEASOME_DEGRAI  | REACTOME_ANTIGEN_PROCESSING_UBIQUITINATION__PROTEASOME_DEGRADATI | 0.58            |
| GO:0031514                                                     | motile cilium                                                    | 0.58            |
| GO:0046415                                                     | urate metabolic process                                          | 0.58            |
| ENSG00000114867                                                | EIF4G1 PPI subnetwork                                            | 0.58            |
| ENSG00000198677                                                | TTC37 PPI subnetwork                                             | 0.58            |
| ENSG00000116717                                                | GADD45A PPI subnetwork                                           | 0.58            |
| REACTOME_CLASS_I_MHC_MEDIATED_ANTIGEN_PROCESSING__PRESENTATIOI | REACTOME_CLASS_I_MHC_MEDIATED_ANTIGEN_PROCESSING__PRESENTATION   | 0.58            |
| GO:0033119                                                     | negative regulation of RNA splicing                              | 0.58            |
| MP:0000914                                                     | exencephaly                                                      | 0.58            |
| GO:0048659                                                     | smooth muscle cell proliferation                                 | 0.58            |
| GO:0060271                                                     | cilium morphogenesis                                             | 0.58            |
| MP:0004774                                                     | abnormal bile salt level                                         | 0.58            |
| MP:0001695                                                     | abnormal gastrulation                                            | 0.58            |
| ENSG00000131504                                                | DIAPH1 PPI subnetwork                                            | 0.58            |
| GO:0048762                                                     | mesenchymal cell differentiation                                 | 0.58            |
| REACTOME_ACTIVATION_OF_BH3:ONLY_PROTEINS                       | REACTOME_ACTIVATION_OF_BH3:ONLY_PROTEINS                         | 0.58            |
| ENSG00000073969                                                | NSF PPI subnetwork                                               | 0.58            |
| GO:0005548                                                     | phospholipid transporter activity                                | 0.58            |
| ENSG00000215120                                                | ENSG00000215120 PPI subnetwork                                   | 0.58            |
| ENSG00000134086                                                | VHL PPI subnetwork                                               | 0.58            |
| ENSG00000134058                                                | CDK7 PPI subnetwork                                              | 0.58            |
| MP:0004924                                                     | abnormal behavior                                                | 0.58            |
| ENSG00000163531                                                | NFASC PPI subnetwork                                             | 0.58            |
| REACTOME_CYTOCHROME_P450_:ARRANGED_BY_SUBSTRATE_TYPE           | REACTOME_CYTOCHROME_P450_:ARRANGED_BY_SUBSTRATE_TYPE             | 0.58            |
| ENSG00000103051                                                | COG4 PPI subnetwork                                              | 0.58            |
| ENSG00000137345                                                | MOG PPI subnetwork                                               | 0.58            |
| ENSG00000206456                                                | ENSG00000206456 PPI subnetwork                                   | 0.58            |
| ENSG00000204655                                                | MOG PPI subnetwork                                               | 0.58            |
| GO:0019915                                                     | lipid storage                                                    | 0.58            |
| MP:0001654                                                     | hepatic necrosis                                                 | 0.58            |
| MP:0001328                                                     | disorganized retinal layers                                      | 0.58            |
| GO:0000726                                                     | non-recombinational repair                                       | 0.58            |
| ENSG00000185787                                                | MORF4L1 PPI subnetwork                                           | 0.58            |
| MP:0006011                                                     | abnormal endolymphatic duct morphology                           | 0.58            |
| REACTOME_ER:PHAGOSOME_PATHWAY                                  | REACTOME_ER:PHAGOSOME_PATHWAY                                    | 0.58            |
| ENSG00000123080                                                | CDKN2C PPI subnetwork                                            | 0.58            |
| REACTOME_SYNTHESIS_OF_DNA                                      | REACTOME_SYNTHESIS_OF_DNA                                        | 0.58            |
| GO:0035145                                                     | exon-exon junction complex                                       | 0.58            |
| GO:0015079                                                     | potassium ion transmembrane transporter activity                 | 0.58            |
| GO:0050730                                                     | regulation of peptidyl-tyrosine phosphorylation                  | 0.58            |
| MP:0008388                                                     | hypochromic microcytic anemia                                    | 0.58            |
| GO:0055008                                                     | cardiac muscle tissue morphogenesis                              | 0.58            |
| GO:0045664                                                     | regulation of neuron differentiation                             | 0.58            |
| ENSG00000168685                                                | IL7R PPI subnetwork                                              | 0.58            |
| KEGG_UBIQUITIN_MEDIATED_PROTEOLYSIS                            | KEGG_UBIQUITIN_MEDIATED_PROTEOLYSIS                              | 0.58            |
| ENSG00000044115                                                | CTNNA1 PPI subnetwork                                            | 0.58            |



| Original gene set ID                                             | Original gene set description                                       | Nominal P value |
|------------------------------------------------------------------|---------------------------------------------------------------------|-----------------|
| ENSG00000160007                                                  | ARHGAP35 PPI subnetwork                                             | 0.59            |
| KEGG_PPAR_SIGNALING_PATHWAY                                      | KEGG_PPAR_SIGNALING_PATHWAY                                         | 0.59            |
| ENSG00000175602                                                  | CCDC85B PPI subnetwork                                              | 0.59            |
| MP:0000233                                                       | abnormal blood flow velocity                                        | 0.59            |
| MP:0006113                                                       | abnormal heart septum morphology                                    | 0.59            |
| KEGG_PROPANOATE_METABOLISM                                       | KEGG_PROPANOATE_METABOLISM                                          | 0.59            |
| GO:0009743                                                       | response to carbohydrate stimulus                                   | 0.59            |
| MP:0001263                                                       | weight loss                                                         | 0.59            |
| GO:0048660                                                       | regulation of smooth muscle cell proliferation                      | 0.59            |
| GO:0070830                                                       | tight junction assembly                                             | 0.59            |
| GO:0018108                                                       | peptidyl-tyrosine phosphorylation                                   | 0.59            |
| MP:0003733                                                       | abnormal retinal inner nuclear layer morphology                     | 0.59            |
| GO:0050818                                                       | regulation of coagulation                                           | 0.59            |
| GO:0048934                                                       | peripheral nervous system neuron differentiation                    | 0.59            |
| GO:0048935                                                       | peripheral nervous system neuron development                        | 0.59            |
| ENSG00000086619                                                  | ERO1LB PPI subnetwork                                               | 0.59            |
| ENSG00000198700                                                  | IPO9 PPI subnetwork                                                 | 0.59            |
| ENSG00000130208                                                  | APOC1 PPI subnetwork                                                | 0.59            |
| ENSG00000067606                                                  | PRKCZ PPI subnetwork                                                | 0.59            |
| GO:0003179                                                       | heart valve morphogenesis                                           | 0.59            |
| REACTOME_CYCLIN_ACDK2:ASSOCIATED_EVENTS_AT_S_PHASE_ENTRY         | REACTOME_CYCLIN_ACDK2:ASSOCIATED_EVENTS_AT_S_PHASE_ENTRY            | 0.59            |
| GO:0005761                                                       | mitochondrial ribosome                                              | 0.59            |
| GO:0000313                                                       | organellar ribosome                                                 | 0.59            |
| GO:0043198                                                       | dendritic shaft                                                     | 0.59            |
| ENSG00000151164                                                  | RAD9B PPI subnetwork                                                | 0.59            |
| ENSG00000117594                                                  | HSD11B1 PPI subnetwork                                              | 0.59            |
| ENSG00000157087                                                  | ATP2B2 PPI subnetwork                                               | 0.59            |
| MP:0000848                                                       | abnormal pons morphology                                            | 0.59            |
| GO:0042327                                                       | positive regulation of phosphorylation                              | 0.59            |
| ENSG00000113575                                                  | PPP2CA PPI subnetwork                                               | 0.59            |
| MP:0005566                                                       | decreased blood urea nitrogen level                                 | 0.59            |
| ENSG00000077522                                                  | ACTN2 PPI subnetwork                                                | 0.59            |
| REACTOME_INHIBITION_OF_THE_PROTEOLYTIC_ACTIVITY_OF_APCC_REQUIRED | REACTOME_INHIBITION_OF_THE_PROTEOLYTIC_ACTIVITY_OF_APCC_REQUIRED_FC | 0.59            |
| REACTOME_INACTIVATION_OF_APCC_VIA_DIRECT_INHIBITION_OF_THE_APCC  | REACTOME_INACTIVATION_OF_APCC_VIA_DIRECT_INHIBITION_OF_THE_APCC_COI | 0.59            |
| ENSG00000088833                                                  | NSFL1C PPI subnetwork                                               | 0.59            |
| KEGG_AUTOIMMUNE_THYROID_DISEASE                                  | KEGG_AUTOIMMUNE_THYROID_DISEASE                                     | 0.59            |
| ENSG00000106829                                                  | TLE4 PPI subnetwork                                                 | 0.59            |
| GO:0019884                                                       | antigen processing and presentation of exogenous antigen            | 0.59            |
| GO:0030135                                                       | coated vesicle                                                      | 0.59            |
| MP:0003644                                                       | thymus atrophy                                                      | 0.59            |
| ENSG00000173566                                                  | NUDT18 PPI subnetwork                                               | 0.59            |
| GO:0015645                                                       | fatty acid ligase activity                                          | 0.59            |
| ENSG00000099960                                                  | SLC7A4 PPI subnetwork                                               | 0.59            |
| ENSG00000013293                                                  | SLC7A14 PPI subnetwork                                              | 0.59            |
| ENSG00000173786                                                  | CNP PPI subnetwork                                                  | 0.59            |
| GO:0050679                                                       | positive regulation of epithelial cell proliferation                | 0.59            |
| GO:0046427                                                       | positive regulation of JAK-STAT cascade                             | 0.59            |
| ENSG00000162692                                                  | VCAM1 PPI subnetwork                                                | 0.59            |
| GO:0007350                                                       | blastoderm segmentation                                             | 0.59            |

| <b>Original gene set ID</b>                                     | <b>Original gene set description</b>                                | <b>Nominal P value</b> |
|-----------------------------------------------------------------|---------------------------------------------------------------------|------------------------|
| KEGG_PROTEASOME                                                 | KEGG_PROTEASOME                                                     | 0.59                   |
| ENSG00000197860                                                 | SGTB PPI subnetwork                                                 | 0.59                   |
| REACTOME_LIGAND:GATED_ION_CHANNEL_TRANSPORT                     | REACTOME_LIGAND:GATED_ION_CHANNEL_TRANSPORT                         | 0.59                   |
| REACTOME_RNA_POLYMERASE_I_TRANSCRIPTION_INITIATION              | REACTOME_RNA_POLYMERASE_I_TRANSCRIPTION_INITIATION                  | 0.59                   |
| GO:0015276                                                      | ligand-gated ion channel activity                                   | 0.59                   |
| GO:0022834                                                      | ligand-gated channel activity                                       | 0.59                   |
| ENSG00000172780                                                 | RAB43 PPI subnetwork                                                | 0.59                   |
| ENSG00000174547                                                 | MRPL11 PPI subnetwork                                               | 0.59                   |
| GO:0008652                                                      | cellular amino acid biosynthetic process                            | 0.59                   |
| KEGG_PHENYLALANINE_METABOLISM                                   | KEGG_PHENYLALANINE_METABOLISM                                       | 0.59                   |
| GO:0030863                                                      | cortical cytoskeleton                                               | 0.59                   |
| GO:0019842                                                      | vitamin binding                                                     | 0.59                   |
| ENSG00000160867                                                 | FGFR4 PPI subnetwork                                                | 0.59                   |
| ENSG00000135597                                                 | REPS1 PPI subnetwork                                                | 0.59                   |
| MP:0003722                                                      | absent ureter                                                       | 0.59                   |
| GO:0009411                                                      | response to UV                                                      | 0.59                   |
| ENSG00000113240                                                 | CLK4 PPI subnetwork                                                 | 0.59                   |
| ENSG00000168118                                                 | RAB4A PPI subnetwork                                                | 0.59                   |
| ENSG00000137462                                                 | TLR2 PPI subnetwork                                                 | 0.59                   |
| ENSG00000134352                                                 | IL6ST PPI subnetwork                                                | 0.59                   |
| ENSG00000151532                                                 | VT1A PPI subnetwork                                                 | 0.59                   |
| GO:0048333                                                      | mesodermal cell differentiation                                     | 0.59                   |
| ENSG00000197956                                                 | S100A6 PPI subnetwork                                               | 0.59                   |
| GO:0032733                                                      | positive regulation of interleukin-10 production                    | 0.59                   |
| ENSG00000125835                                                 | SNRNPB PPI subnetwork                                               | 0.59                   |
| MP:0002572                                                      | abnormal emotion/affect behavior                                    | 0.59                   |
| ENSG00000198056                                                 | PRIM1 PPI subnetwork                                                | 0.59                   |
| ENSG00000151148                                                 | UBE3B PPI subnetwork                                                | 0.59                   |
| ENSG00000054118                                                 | THRAP3 PPI subnetwork                                               | 0.59                   |
| ENSG00000120438                                                 | TCP1 PPI subnetwork                                                 | 0.59                   |
| MP:0002335                                                      | decreased airway responsiveness                                     | 0.59                   |
| ENSG00000141027                                                 | NCOR1 PPI subnetwork                                                | 0.59                   |
| ENSG00000072952                                                 | MRVI1 PPI subnetwork                                                | 0.59                   |
| REACTOME_PI3KAKT_ACTIVATION                                     | REACTOME_PI3KAKT_ACTIVATION                                         | 0.59                   |
| ENSG00000109846                                                 | CRYAB PPI subnetwork                                                | 0.59                   |
| REACTOME_REPAIR_SYNTHESIS_OF_PATCH_27:30_BASES_LONG_BY_DNA_PO   | REACTOME_REPAIR_SYNTHESIS_OF_PATCH_27:30_BASES_LONG_BY_DNA_POLYM    | 0.59                   |
| REACTOME_REPAIR_SYNTHESIS_FOR_GAP:FILLING_BY_DNA_POLYMERASE_IN_ | REACTOME_REPAIR_SYNTHESIS_FOR_GAP:FILLING_BY_DNA_POLYMERASE_IN_TC:M | 0.59                   |
| REACTOME_SHC1_EVENTS_IN_ERBB4_SIGNALING                         | REACTOME_SHC1_EVENTS_IN_ERBB4_SIGNALING                             | 0.59                   |
| GO:0030326                                                      | embryonic limb morphogenesis                                        | 0.59                   |
| GO:0035113                                                      | embryonic appendage morphogenesis                                   | 0.59                   |
| MP:0002628                                                      | hepatic steatosis                                                   | 0.59                   |
| GO:0004653                                                      | polypeptide N-acetylgalactosaminyltransferase activity              | 0.6                    |
| GO:0072331                                                      | signal transduction by p53 class mediator                           | 0.6                    |
| MP:0006069                                                      | abnormal retinal neuronal layer morphology                          | 0.6                    |
| MP:0008699                                                      | increased interleukin-4 secretion                                   | 0.6                    |
| GO:0019724                                                      | B cell mediated immunity                                            | 0.6                    |
| KEGG_NON_HOMOLOGOUS_END_JOINING                                 | KEGG_NON_HOMOLOGOUS_END_JOINING                                     | 0.6                    |
| REACTOME_PHASE_II_CONJUGATION                                   | REACTOME_PHASE_II_CONJUGATION                                       | 0.6                    |
| ENSG00000120063                                                 | GNA13 PPI subnetwork                                                | 0.6                    |



| Original gene set ID                                         | Original gene set description                                 | Nominal P value |
|--------------------------------------------------------------|---------------------------------------------------------------|-----------------|
| KEGG_PENTOSE_PHOSPHATE_PATHWAY                               | KEGG_PENTOSE_PHOSPHATE_PATHWAY                                | 0.6             |
| ENSG00000177426                                              | TGIF1 PPI subnetwork                                          | 0.6             |
| ENSG00000015153                                              | YAF2 PPI subnetwork                                           | 0.6             |
| REACTOME_XENOBIOTICS                                         | REACTOME_XENOBIOTICS                                          | 0.6             |
| ENSG00000137673                                              | MMP7 PPI subnetwork                                           | 0.6             |
| REACTOME_CDK:MEDIATED_PHOSPHORYLATION_AND_REMOVAL_OF_CDC6    | REACTOME_CDK:MEDIATED_PHOSPHORYLATION_AND_REMOVAL_OF_CDC6     | 0.6             |
| GO:0007631                                                   | feeding behavior                                              | 0.6             |
| ENSG00000134287                                              | ARF3 PPI subnetwork                                           | 0.6             |
| GO:0043297                                                   | apical junction assembly                                      | 0.6             |
| ENSG00000206274                                              | ENSG00000206274 PPI subnetwork                                | 0.6             |
| ENSG00000206383                                              | HSPA1L PPI subnetwork                                         | 0.6             |
| ENSG00000124299                                              | PEPD PPI subnetwork                                           | 0.6             |
| ENSG00000162191                                              | UBXN1 PPI subnetwork                                          | 0.6             |
| ENSG00000139180                                              | NDUFA9 PPI subnetwork                                         | 0.6             |
| ENSG00000183049                                              | CAMK1D PPI subnetwork                                         | 0.6             |
| ENSG00000139549                                              | DHH PPI subnetwork                                            | 0.6             |
| GO:0042579                                                   | microbody                                                     | 0.6             |
| GO:0005777                                                   | peroxisome                                                    | 0.6             |
| REACTOME_SIGNALING_BY_INSULIN_RECEPTOR                       | REACTOME_SIGNALING_BY_INSULIN_RECEPTOR                        | 0.6             |
| ENSG00000155657                                              | TTN PPI subnetwork                                            | 0.6             |
| REACTOME_UBIQUITIN:DEPENDENT_DEGRADATION_OF_CYCLIN_D         | REACTOME_UBIQUITIN:DEPENDENT_DEGRADATION_OF_CYCLIN_D          | 0.6             |
| REACTOME_UBIQUITIN:DEPENDENT_DEGRADATION_OF_CYCLIN_D1        | REACTOME_UBIQUITIN:DEPENDENT_DEGRADATION_OF_CYCLIN_D1         | 0.6             |
| ENSG00000134759                                              | ELP2 PPI subnetwork                                           | 0.6             |
| GO:0030031                                                   | cell projection assembly                                      | 0.6             |
| ENSG00000100867                                              | DHRS2 PPI subnetwork                                          | 0.6             |
| GO:0030433                                                   | ER-associated protein catabolic process                       | 0.6             |
| MP:0001491                                                   | unresponsive to tactile stimuli                               | 0.6             |
| ENSG00000106245                                              | BUD31 PPI subnetwork                                          | 0.6             |
| KEGG_SELENOAMINO_ACID_METABOLISM                             | KEGG_SELENOAMINO_ACID_METABOLISM                              | 0.6             |
| GO:0043535                                                   | regulation of blood vessel endothelial cell migration         | 0.6             |
| GO:0015300                                                   | solute:solute antiporter activity                             | 0.6             |
| GO:0046364                                                   | monosaccharide biosynthetic process                           | 0.6             |
| GO:0050907                                                   | detection of chemical stimulus involved in sensory perceptior | 0.6             |
| KEGG_PURINE_METABOLISM                                       | KEGG_PURINE_METABOLISM                                        | 0.6             |
| MP:0001417                                                   | decreased exploration in new environment                      | 0.6             |
| ENSG00000114698                                              | PLSCR4 PPI subnetwork                                         | 0.6             |
| ENSG00000153922                                              | CHD1 PPI subnetwork                                           | 0.6             |
| MP:0000188                                                   | abnormal circulating glucose level                            | 0.6             |
| GO:0001763                                                   | morphogenesis of a branching structure                        | 0.6             |
| REACTOME_NEPNS2_INTERACTS_WITH_THE_CELLULAR_EXPORT_MACHINERY | REACTOME_NEPNS2_INTERACTS_WITH_THE_CELLULAR_EXPORT_MACHINERY  | 0.6             |
| ENSG00000091428                                              | RAPGEF4 PPI subnetwork                                        | 0.6             |
| ENSG00000087460                                              | GNAS PPI subnetwork                                           | 0.6             |
| GO:0045214                                                   | sarcomere organization                                        | 0.6             |
| MP:0001431                                                   | abnormal eating behavior                                      | 0.6             |
| GO:0071174                                                   | mitotic cell cycle spindle checkpoint                         | 0.6             |
| ENSG00000196235                                              | SUPT5H PPI subnetwork                                         | 0.6             |
| GO:0031669                                                   | cellular response to nutrient levels                          | 0.6             |
| ENSG00000101856                                              | PGRMC1 PPI subnetwork                                         | 0.6             |
| ENSG00000173692                                              | PSMD1 PPI subnetwork                                          | 0.6             |

| Original gene set ID                                   | Original gene set description                            | Nominal P value |
|--------------------------------------------------------|----------------------------------------------------------|-----------------|
| MP:0000097                                             | short maxilla                                            | 0.6             |
| MP:0002064                                             | seizures                                                 | 0.6             |
| MP:0000807                                             | abnormal hippocampus morphology                          | 0.6             |
| GO:0018149                                             | peptide cross-linking                                    | 0.6             |
| ENSG00000120616                                        | EPC1 PPI subnetwork                                      | 0.6             |
| GO:0006303                                             | double-strand break repair via nonhomologous end joining | 0.6             |
| GO:0030855                                             | epithelial cell differentiation                          | 0.6             |
| GO:0005249                                             | voltage-gated potassium channel activity                 | 0.6             |
| ENSG00000135100                                        | HNF1A PPI subnetwork                                     | 0.6             |
| ENSG00000163435                                        | ELF3 PPI subnetwork                                      | 0.6             |
| MP:0000880                                             | decreased Purkinje cell number                           | 0.6             |
| ENSG00000082074                                        | FYB PPI subnetwork                                       | 0.6             |
| MP:0005221                                             | abnormal rostral-caudal axis patterning                  | 0.6             |
| KEGG_NON_SMALL_CELL_LUNG_CANCER                        | KEGG_NON_SMALL_CELL_LUNG_CANCER                          | 0.6             |
| ENSG00000108443                                        | RPS6KB1 PPI subnetwork                                   | 0.6             |
| REACTOME_SIGNAL_TRANSDUCTION_BY_L1                     | REACTOME_SIGNAL_TRANSDUCTION_BY_L1                       | 0.6             |
| ENSG00000150991                                        | UBC PPI subnetwork                                       | 0.6             |
| REACTOME_REGULATION_OF_DNA_REPLICATION                 | REACTOME_REGULATION_OF_DNA_REPLICATION                   | 0.6             |
| ENSG00000133710                                        | SPINK5 PPI subnetwork                                    | 0.6             |
| GO:0033059                                             | cellular pigmentation                                    | 0.6             |
| MP:0008539                                             | decreased susceptibility to induced colitis              | 0.6             |
| ENSG00000166407                                        | LMO1 PPI subnetwork                                      | 0.6             |
| GO:0047485                                             | protein N-terminus binding                               | 0.6             |
| KEGG_AXON_GUIDANCE                                     | KEGG_AXON_GUIDANCE                                       | 0.6             |
| ENSG00000086758                                        | HUWE1 PPI subnetwork                                     | 0.6             |
| ENSG00000092470                                        | WDR76 PPI subnetwork                                     | 0.6             |
| GO:0060606                                             | tube closure                                             | 0.6             |
| ENSG00000137561                                        | TTPA PPI subnetwork                                      | 0.6             |
| GO:0005496                                             | steroid binding                                          | 0.6             |
| GO:0071230                                             | cellular response to amino acid stimulus                 | 0.6             |
| GO:0033365                                             | protein localization to organelle                        | 0.6             |
| GO:0005798                                             | Golgi-associated vesicle                                 | 0.6             |
| REACTOME_NOREPINEPHRINE_NEUROTRANSMITTER_RELEASE_CYCLE | REACTOME_NOREPINEPHRINE_NEUROTRANSMITTER_RELEASE_CYCLE   | 0.6             |
| GO:0004601                                             | peroxidase activity                                      | 0.6             |
| GO:0016684                                             | oxidoreductase activity, acting on peroxide as acceptor  | 0.6             |
| GO:0042274                                             | ribosomal small subunit biogenesis                       | 0.6             |
| ENSG00000154473                                        | BUB3 PPI subnetwork                                      | 0.6             |
| GO:2000045                                             | regulation of G1/S transition of mitotic cell cycle      | 0.6             |
| GO:0008064                                             | regulation of actin polymerization or depolymerization   | 0.6             |
| GO:0048588                                             | developmental cell growth                                | 0.6             |
| MP:0005668                                             | decreased circulating leptin level                       | 0.6             |
| ENSG00000086827                                        | ZW10 PPI subnetwork                                      | 0.6             |
| GO:0002009                                             | morphogenesis of an epithelium                           | 0.6             |
| GO:0020037                                             | heme binding                                             | 0.6             |
| MP:0001475                                             | reduced long term depression                             | 0.6             |
| GO:0006164                                             | purine nucleotide biosynthetic process                   | 0.6             |
| ENSG00000065978                                        | YBX1 PPI subnetwork                                      | 0.6             |
| ENSG00000130816                                        | DNMT1 PPI subnetwork                                     | 0.6             |
| ENSG00000168078                                        | PBK PPI subnetwork                                       | 0.6             |



| Original gene set ID                                          | Original gene set description                                        | Nominal P value |
|---------------------------------------------------------------|----------------------------------------------------------------------|-----------------|
| ENSG00000163002                                               | NUP35 PPI subnetwork                                                 | 0.61            |
| ENSG00000187266                                               | EPOR PPI subnetwork                                                  | 0.61            |
| REACTOME_HOMOLOGOUS_RECOMBINATION_REPAIR                      | REACTOME_HOMOLOGOUS_RECOMBINATION_REPAIR                             | 0.61            |
| REACTOME_HOMOLOGOUS_RECOMBINATION_REPAIR_OF_REPLICATION:INDEP | REACTOME_HOMOLOGOUS_RECOMBINATION_REPAIR_OF_REPLICATION:INDEPEN      | 0.61            |
| GO:0019200                                                    | carbohydrate kinase activity                                         | 0.61            |
| ENSG00000085276                                               | MECOM PPI subnetwork                                                 | 0.61            |
| ENSG00000187239                                               | FNBP1 PPI subnetwork                                                 | 0.61            |
| GO:0006352                                                    | transcription initiation, DNA-dependent                              | 0.61            |
| ENSG00000109917                                               | ZNF259 PPI subnetwork                                                | 0.61            |
| MP:0002913                                                    | abnormal PNS synaptic transmission                                   | 0.61            |
| ENSG00000113594                                               | LIFR PPI subnetwork                                                  | 0.61            |
| MP:0000781                                                    | decreased corpus callosum size                                       | 0.61            |
| GO:0006833                                                    | water transport                                                      | 0.61            |
| ENSG00000100285                                               | NEFH PPI subnetwork                                                  | 0.61            |
| GO:0003746                                                    | translation elongation factor activity                               | 0.61            |
| ENSG00000125482                                               | TTF1 PPI subnetwork                                                  | 0.61            |
| MP:0004799                                                    | increased susceptibility to experimental autoimmune encephalomyeliti | 0.61            |
| ENSG00000148468                                               | FAM171A1 PPI subnetwork                                              | 0.61            |
| ENSG00000112992                                               | NNT PPI subnetwork                                                   | 0.61            |
| REACTOME_OLFACTORY_SIGNALING_PATHWAY                          | REACTOME_OLFACTORY_SIGNALING_PATHWAY                                 | 0.61            |
| GO:0006821                                                    | chloride transport                                                   | 0.61            |
| MP:0003703                                                    | abnormal vestibulocochlear ganglion morphology                       | 0.61            |
| GO:0045076                                                    | regulation of interleukin-2 biosynthetic process                     | 0.61            |
| GO:0009069                                                    | serine family amino acid metabolic process                           | 0.61            |
| REACTOME_ORC1_REMOVAL_FROM_CHROMATIN                          | REACTOME_ORC1_REMOVAL_FROM_CHROMATIN                                 | 0.61            |
| REACTOME_SWITCHING_OF_ORIGINS_TO_A_POST:REPLICATIVE_STATE     | REACTOME_SWITCHING_OF_ORIGINS_TO_A_POST:REPLICATIVE_STATE            | 0.61            |
| ENSG00000164742                                               | ADCY1 PPI subnetwork                                                 | 0.61            |
| ENSG00000178409                                               | BEND3 PPI subnetwork                                                 | 0.61            |
| REACTOME_CELL_CYCLE                                           | REACTOME_CELL_CYCLE                                                  | 0.61            |
| ENSG00000198900                                               | TOP1 PPI subnetwork                                                  | 0.61            |
| GO:2000146                                                    | negative regulation of cell motility                                 | 0.61            |
| GO:0090066                                                    | regulation of anatomical structure size                              | 0.61            |
| ENSG00000170315                                               | UBB PPI subnetwork                                                   | 0.61            |
| GO:0001673                                                    | male germ cell nucleus                                               | 0.61            |
| REACTOME_REGULATION_OF_APOPTOSIS                              | REACTOME_REGULATION_OF_APOPTOSIS                                     | 0.61            |
| MP:0001407                                                    | short stride length                                                  | 0.61            |
| ENSG00000119392                                               | GLE1 PPI subnetwork                                                  | 0.61            |
| ENSG00000016402                                               | IL20RA PPI subnetwork                                                | 0.61            |
| MP:0011186                                                    | abnormal visceral endoderm morphology                                | 0.61            |
| MP:0000890                                                    | thin cerebellar molecular layer                                      | 0.61            |
| GO:0000930                                                    | gamma-tubulin complex                                                | 0.61            |
| ENSG00000110324                                               | IL10RA PPI subnetwork                                                | 0.61            |
| MP:0001340                                                    | abnormal eyelid morphology                                           | 0.61            |
| ENSG00000173020                                               | ADRBK1 PPI subnetwork                                                | 0.61            |
| REACTOME_GAB1_SIGNALOSOME                                     | REACTOME_GAB1_SIGNALOSOME                                            | 0.61            |
| REACTOME_CYCLIN_AB1_ASSOCIATED_EVENTS_DURING_G2M_TRANSITION   | REACTOME_CYCLIN_AB1_ASSOCIATED_EVENTS_DURING_G2M_TRANSITION          | 0.61            |
| GO:0048008                                                    | platelet-derived growth factor receptor signaling pathway            | 0.61            |
| ENSG00000167088                                               | SNRPD1 PPI subnetwork                                                | 0.61            |
| GO:0055013                                                    | cardiac muscle cell development                                      | 0.61            |



| Original gene set ID                          | Original gene set description                 | Nominal P value |
|-----------------------------------------------|-----------------------------------------------|-----------------|
| MP:0008705                                    | increased interleukin-6 secretion             | 0.62            |
| MP:0009434                                    | paraparesis                                   | 0.62            |
| ENSG00000076555                               | ACACB PPI subnetwork                          | 0.62            |
| KEGG_OLFACTORY_TRANSDUCTION                   | KEGG_OLFACTORY_TRANSDUCTION                   | 0.62            |
| ENSG00000112983                               | BRD8 PPI subnetwork                           | 0.62            |
| GO:0010883                                    | regulation of lipid storage                   | 0.62            |
| ENSG00000175334                               | BANF1 PPI subnetwork                          | 0.62            |
| ENSG00000171560                               | FGA PPI subnetwork                            | 0.62            |
| MP:0002989                                    | small kidney                                  | 0.62            |
| ENSG00000138757                               | G3BP2 PPI subnetwork                          | 0.62            |
| MP:0008024                                    | absent lymph nodes                            | 0.62            |
| MP:0002446                                    | abnormal macrophage morphology                | 0.62            |
| ENSG00000130725                               | UBE2M PPI subnetwork                          | 0.62            |
| REACTOME_NUCLEAR_IMPORT_OF_REV_PROTEIN        | REACTOME_NUCLEAR_IMPORT_OF_REV_PROTEIN        | 0.62            |
| MP:0001386                                    | abnormal maternal nurturing                   | 0.62            |
| ENSG00000162594                               | IL23R PPI subnetwork                          | 0.62            |
| GO:0032272                                    | negative regulation of protein polymerization | 0.62            |
| ENSG00000206281                               | TAPBP PPI subnetwork                          | 0.62            |
| ENSG00000112493                               | TAPBP PPI subnetwork                          | 0.62            |
| ENSG00000206208                               | TAPBP PPI subnetwork                          | 0.62            |
| ENSG00000186298                               | PPP1CC PPI subnetwork                         | 0.62            |
| MP:0000968                                    | abnormal sensory neuron innervation pattern   | 0.62            |
| REACTOME_AXON_GUIDANCE                        | REACTOME_AXON_GUIDANCE                        | 0.62            |
| GO:0048407                                    | platelet-derived growth factor binding        | 0.62            |
| REACTOME_PROLACTIN_RECEPTOR_SIGNALING         | REACTOME_PROLACTIN_RECEPTOR_SIGNALING         | 0.62            |
| MP:0004190                                    | abnormal direction of embryo turning          | 0.62            |
| ENSG00000023734                               | STRAP PPI subnetwork                          | 0.62            |
| GO:0031225                                    | anchored to membrane                          | 0.62            |
| GO:0046906                                    | tetrapyrrole binding                          | 0.62            |
| GO:0031272                                    | regulation of pseudopodium assembly           | 0.62            |
| MP:0001680                                    | abnormal mesoderm development                 | 0.62            |
| MP:0000522                                    | kidney cortex cysts                           | 0.62            |
| REACTOME_SPHINGOLIPID_DE_NOVO_BIOSYNTHESIS    | REACTOME_SPHINGOLIPID_DE_NOVO_BIOSYNTHESIS    | 0.62            |
| GO:0035567                                    | non-canonical Wnt receptor signaling pathway  | 0.62            |
| GO:0031513                                    | nonmotile primary cilium                      | 0.62            |
| GO:0070603                                    | SWI/SNF-type complex                          | 0.62            |
| ENSG00000140307                               | GTF2A2 PPI subnetwork                         | 0.62            |
| GO:0042462                                    | eye photoreceptor cell development            | 0.62            |
| REACTOME_POST_NMDA_RECEPTOR_ACTIVATION_EVENTS | REACTOME_POST_NMDA_RECEPTOR_ACTIVATION_EVENTS | 0.62            |
| GO:0000018                                    | regulation of DNA recombination               | 0.62            |
| GO:0072507                                    | divalent inorganic cation homeostasis         | 0.62            |
| MP:0000832                                    | abnormal thalamus morphology                  | 0.62            |
| GO:0046782                                    | regulation of viral transcription             | 0.62            |
| MP:0008058                                    | abnormal DNA repair                           | 0.62            |
| ENSG00000167414                               | GNG8 PPI subnetwork                           | 0.62            |
| ENSG00000092841                               | MYL6 PPI subnetwork                           | 0.62            |
| GO:0030425                                    | dendrite                                      | 0.62            |
| GO:0002063                                    | chondrocyte development                       | 0.62            |
| GO:0048741                                    | skeletal muscle fiber development             | 0.62            |

| Original gene set ID                                                              | Original gene set description                                                                                      | Nominal P value |
|-----------------------------------------------------------------------------------|--------------------------------------------------------------------------------------------------------------------|-----------------|
| REACTOME_TRANSPORT_OF_GLUCCOSE_AND_OTHER_SUGARS_BILE_SALTS_ANI<br>MP:0008533      | REACTOME_TRANSPORT_OF_GLUCCOSE_AND_OTHER_SUGARS_BILE_SALTS_AND_O<br>abnormal anterior visceral endoderm morphology | 0.62            |
| ENSG000000177542<br>MP:0003111                                                    | SLC25A22 PPI subnetwork<br>abnormal cell nucleus morphology                                                        | 0.62            |
| MP:0004672                                                                        | short ribs                                                                                                         | 0.62            |
| ENSG000000116830<br>MP:0005545                                                    | TTF2 PPI subnetwork<br>abnormal lens development                                                                   | 0.62            |
| GO:0045622<br>MP:0000031                                                          | regulation of T-helper cell differentiatior<br>abnormal cochlea morphology                                         | 0.62            |
| GO:0032814                                                                        | regulation of natural killer cell activation                                                                       | 0.62            |
| MP:0004620                                                                        | cervical vertebral fusion                                                                                          | 0.62            |
| GO:0044448                                                                        | cell cortex part                                                                                                   | 0.62            |
| GO:0030513                                                                        | positive regulation of BMP signaling pathway                                                                       | 0.62            |
| ENSG000000171453                                                                  | POLR1C PPI subnetwork                                                                                              | 0.62            |
| REACTOME_RNA_POLYMERASE_III_TRANSCRIPTION_INITIATION_FROM_TYPE_3_Pf<br>MP:0009814 | REACTOME_RNA_POLYMERASE_III_TRANSCRIPTION_INITIATION_FROM_TYPE_3_Pf<br>increased prostaglandin level               | 0.62            |
| GO:0000084                                                                        | S phase of mitotic cell cycle                                                                                      | 0.62            |
| GO:0047555                                                                        | 3',5'-cyclic-GMP phosphodiesterase activity                                                                        | 0.62            |
| REACTOME_FACTORS_INVOLVED_IN_MEGAKARYOCYTE_DEVELOPMENT_AND_PLA<br>GO:0002027      | REACTOME_FACTORS_INVOLVED_IN_MEGAKARYOCYTE_DEVELOPMENT_AND_PLA<br>regulation of heart rate                         | 0.62            |
| MP:0000430                                                                        | absent maxillary shelf                                                                                             | 0.62            |
| GO:0006809                                                                        | nitric oxide biosynthetic process                                                                                  | 0.62            |
| ENSG000000144908                                                                  | ALDH1L1 PPI subnetwork                                                                                             | 0.62            |
| GO:0035136                                                                        | forelimb morphogenesis                                                                                             | 0.62            |
| ENSG000000159023                                                                  | EPB41 PPI subnetwork                                                                                               | 0.62            |
| ENSG000000169062                                                                  | UPF3A PPI subnetwork                                                                                               | 0.62            |
| REACTOME_AUTODEGRADATION_OF_THE_E3_UBIQUITIN_LIGASE_COP1<br>ENSG000000083093      | REACTOME_AUTODEGRADATION_OF_THE_E3_UBIQUITIN_LIGASE_COP1<br>PALB2 PPI subnetwork                                   | 0.63            |
| ENSG000000120500                                                                  | ARR3 PPI subnetwork                                                                                                | 0.63            |
| ENSG000000134001                                                                  | EIF2S1 PPI subnetwork                                                                                              | 0.63            |
| REACTOME_DESTABILIZATION_OF_MRNA_BY_AUF1_HNRNP_D0<br>GO:0014032                   | REACTOME_DESTABILIZATION_OF_MRNA_BY_AUF1_HNRNP_D0<br>neural crest cell development                                 | 0.63            |
| GO:0016591                                                                        | DNA-directed RNA polymerase II, holoenzyme                                                                         | 0.63            |
| GO:0071346                                                                        | cellular response to interferon-gamma                                                                              | 0.63            |
| GO:0014033                                                                        | neural crest cell differentiation                                                                                  | 0.63            |
| MP:0004814                                                                        | reduced linear vestibular evoked potentia                                                                          | 0.63            |
| GO:0032722                                                                        | positive regulation of chemokine production                                                                        | 0.63            |
| ENSG000000139719                                                                  | VPS33A PPI subnetwork                                                                                              | 0.63            |
| ENSG000000124334                                                                  | IL9R PPI subnetwork                                                                                                | 0.63            |
| GO:0030330                                                                        | DNA damage response, signal transduction by p53 class mediator                                                     | 0.63            |
| ENSG000000103152                                                                  | MPG PPI subnetwork                                                                                                 | 0.63            |
| ENSG000000126785                                                                  | RHOJ PPI subnetwork                                                                                                | 0.63            |
| ENSG000000107263                                                                  | RAPGEF1 PPI subnetwork                                                                                             | 0.63            |
| GO:0007091                                                                        | mitotic metaphase/anaphase transition                                                                              | 0.63            |
| GO:0003203                                                                        | endocardial cushion morphogenesis                                                                                  | 0.63            |
| ENSG000000166900                                                                  | STX3 PPI subnetwork                                                                                                | 0.63            |
| ENSG000000123562                                                                  | MORF4L2 PPI subnetwork                                                                                             | 0.63            |
| MP:0001963                                                                        | abnormal hearing physiology                                                                                        | 0.63            |
| MP:0004100                                                                        | abnormal spinal cord interneuron morphology                                                                        | 0.63            |

**Original gene set ID****Original gene set description****Nominal P value**

|                                                                  |                                                                  |      |
|------------------------------------------------------------------|------------------------------------------------------------------|------|
| ENSG00000158169                                                  | FANCC PPI subnetwork                                             | 0.63 |
| MP:0004189                                                       | abnormal alveolar process morphology                             | 0.63 |
| KEGG_PENTOSE_AND_GLUCURONATE_INTERCONVERSIONS                    | KEGG_PENTOSE_AND_GLUCURONATE_INTERCONVERSIONS                    | 0.63 |
| ENSG00000005249                                                  | PRKAR2B PPI subnetwork                                           | 0.63 |
| ENSG00000078369                                                  | GNB1 PPI subnetwork                                              | 0.63 |
| ENSG00000088305                                                  | DNMT3B PPI subnetwork                                            | 0.63 |
| ENSG00000176884                                                  | GRIN1 PPI subnetwork                                             | 0.63 |
| GO:0006893                                                       | Golgi to plasma membrane transport                               | 0.63 |
| ENSG00000122966                                                  | CIT PPI subnetwork                                               | 0.63 |
| ENSG00000137486                                                  | ARRB1 PPI subnetwork                                             | 0.63 |
| REACTOME_REGULATION_OF_ACTIVATED_PAK:2P34_BY_PROTEASOME_MEDIATED | REACTOME_REGULATION_OF_ACTIVATED_PAK:2P34_BY_PROTEASOME_MEDIATED | 0.63 |
| GO:0031069                                                       | hair follicle morphogenesis                                      | 0.63 |
| ENSG00000204390                                                  | HSPA1L PPI subnetwork                                            | 0.63 |
| ENSG00000034713                                                  | GABARAPL2 PPI subnetwork                                         | 0.63 |
| ENSG00000126351                                                  | THRA PPI subnetwork                                              | 0.63 |
| GO:0051320                                                       | S phase                                                          | 0.63 |
| GO:0046849                                                       | bone remodeling                                                  | 0.63 |
| GO:0006376                                                       | mRNA splice site selection                                       | 0.63 |
| GO:0016840                                                       | carbon-nitrogen lyase activity                                   | 0.63 |
| ENSG00000106400                                                  | ZNHIT1 PPI subnetwork                                            | 0.63 |
| ENSG00000167880                                                  | EVPL PPI subnetwork                                              | 0.63 |
| GO:0015669                                                       | gas transport                                                    | 0.63 |
| GO:0044306                                                       | neuron projection terminus                                       | 0.63 |
| GO:0060330                                                       | regulation of response to interferon-gamma                       | 0.63 |
| GO:0060334                                                       | regulation of interferon-gamma-mediated signaling pathway        | 0.63 |
| GO:0070838                                                       | divalent metal ion transport                                     | 0.63 |
| GO:0006302                                                       | double-strand break repair                                       | 0.63 |
| ENSG00000113812                                                  | ACTR8 PPI subnetwork                                             | 0.63 |
| REACTOME_REGULATION_OF_APCC_ACTIVATORS_BETWEEN_G1S_AND_EARLY     | REACTOME_REGULATION_OF_APCC_ACTIVATORS_BETWEEN_G1S_AND_EARLY     | 0.63 |
| MP:0008965                                                       | increased basal metabolism                                       | 0.63 |
| MP:0001663                                                       | abnormal digestive system physiology                             | 0.63 |
| GO:0001539                                                       | ciliary or flagellar motility                                    | 0.63 |
| ENSG00000025293                                                  | PHF20 PPI subnetwork                                             | 0.63 |
| ENSG00000067900                                                  | ROCK1 PPI subnetwork                                             | 0.63 |
| REACTOME_APC:CDC20_MEDIATED_DEGRADATION_OF_NEK2A                 | REACTOME_APC:CDC20_MEDIATED_DEGRADATION_OF_NEK2A                 | 0.63 |
| ENSG00000142684                                                  | ZNF593 PPI subnetwork                                            | 0.63 |
| GO:0030336                                                       | negative regulation of cell migration                            | 0.63 |
| GO:0001947                                                       | heart looping                                                    | 0.63 |
| GO:0061371                                                       | determination of heart left/right asymmetry                      | 0.63 |
| MP:0002906                                                       | increased susceptibility to pharmacologically induced seizure    | 0.63 |
| GO:0070979                                                       | protein K11-linked ubiquitination                                | 0.63 |
| ENSG00000103043                                                  | VAC14 PPI subnetwork                                             | 0.63 |
| ENSG00000132002                                                  | DNAJB1 PPI subnetwork                                            | 0.63 |
| GO:0048814                                                       | regulation of dendrite morphogenesis                             | 0.63 |
| ENSG00000172020                                                  | GAP43 PPI subnetwork                                             | 0.63 |
| GO:0016209                                                       | antioxidant activity                                             | 0.63 |
| ENSG00000113194                                                  | FAF2 PPI subnetwork                                              | 0.63 |
| GO:0090103                                                       | cochlea morphogenesis                                            | 0.63 |
| GO:0030101                                                       | natural killer cell activation                                   | 0.63 |



## Original gene set ID

REACTOME\_P53:DEPENDENT\_G1S\_DNA\_DAMAGE\_CHECKPOINT  
 REACTOME\_P53:DEPENDENT\_G1\_DNA\_DAMAGE\_RESPONSE  
 REACTOME\_PKB:MEDIATED\_EVENTS  
 ENSG00000077348  
 ENSG00000152270  
 GO:0034765  
 MP:0002494  
 ENSG00000100504  
 ENSG00000130787  
 REACTOME\_SCF:BETA:TRCP\_MEDIATED\_DEGRADATION\_OF\_EMI1  
 ENSG00000110448  
 GO:0043623  
 GO:0030137  
 ENSG00000143771  
 ENSG00000136108  
 ENSG00000196084  
 MP:0005269  
 REACTOME\_INTERLEUKIN:1\_SIGNALING  
 ENSG00000163918  
 ENSG00000087258  
 GO:0034220  
 ENSG00000135945  
 GO:0010950  
 GO:0042267  
 GO:0002228  
 GO:0030125  
 ENSG00000133706  
 ENSG00000157916  
 GO:0048754  
 ENSG00000167085  
 MP:0000885  
 ENSG00000056558  
 GO:0016861  
 ENSG00000166851  
 GO:0042734  
 ENSG00000169139  
 GO:0006575  
 GO:0031970  
 GO:0072503  
 ENSG00000140694  
 ENSG00000196510  
 GO:0000049  
 GO:0019751  
 GO:0048871  
 GO:0032660  
 GO:0032620  
 MP:0008027  
 REACTOME\_REGULATION\_OF\_GLUKOKINASE\_BY\_GLUKOKINASE\_REGULATORY  
 GO:0002699

## Original gene set description

REACTOME\_P53:DEPENDENT\_G1S\_DNA\_DAMAGE\_CHECKPOINT  
 REACTOME\_P53:DEPENDENT\_G1\_DNA\_DAMAGE\_RESPONSE  
 REACTOME\_PKB:MEDIATED\_EVENTS  
 EXOSC5 PPI subnetwork  
 PDE3B PPI subnetwork  
 regulation of ion transmembrane transport  
 increased IgM level  
 PYGL PPI subnetwork  
 HIP1R PPI subnetwork  
 REACTOME\_SCF:BETA:TRCP\_MEDIATED\_DEGRADATION\_OF\_EMI1  
 CD5 PPI subnetwork  
 cellular protein complex assembly  
 COPI-coated vesicle  
 CNIH4 PPI subnetwork  
 CKAP2 PPI subnetwork  
 ENSG00000196084 PPI subnetwork  
 abnormal occipital bone morphology  
 REACTOME\_INTERLEUKIN:1\_SIGNALING  
 RFC4 PPI subnetwork  
 GNAO1 PPI subnetwork  
 ion transmembrane transport  
 REV1 PPI subnetwork  
 positive regulation of endopeptidase activity  
 natural killer cell mediated cytotoxicity  
 natural killer cell mediated immunity  
 clathrin vesicle coat  
 LARS PPI subnetwork  
 RER1 PPI subnetwork  
 branching morphogenesis of a tube  
 PHB PPI subnetwork  
 ectopic Purkinje cell  
 TRAF1 PPI subnetwork  
 intramolecular oxidoreductase activity, interconverting aldoses and ketose:  
 PLK1 PPI subnetwork  
 presynaptic membrane  
 UBE2V2 PPI subnetwork  
 cellular modified amino acid metabolic process  
 organelle envelope lumen  
 cellular divalent inorganic cation homeostasis  
 PARN PPI subnetwork  
 ANAPC7 PPI subnetwork  
 tRNA binding  
 polyol metabolic process  
 multicellular organismal homeostasis  
 regulation of interleukin-17 production  
 interleukin-17 production  
 abnormal spinal cord white matter morphology  
 REACTOME\_REGULATION\_OF\_GLUKOKINASE\_BY\_GLUKOKINASE\_REGULATORY\_P  
 positive regulation of immune effector process

## Nominal P value

0.63  
 0.63  
 0.63  
 0.63  
 0.63  
 0.63  
 0.63  
 0.63  
 0.63  
 0.63  
 0.63  
 0.63  
 0.63  
 0.63  
 0.63  
 0.63  
 0.63  
 0.63  
 0.63  
 0.63  
 0.63  
 0.63  
 0.63  
 0.63  
 0.63  
 0.63  
 0.63  
 0.63  
 0.63  
 0.63  
 0.63  
 0.63  
 0.63  
 0.63  
 0.63  
 0.63  
 0.63  
 0.63  
 0.63  
 0.63  
 0.63  
 0.63  
 0.64  
 0.64  
 0.64  
 0.64  
 0.64  
 0.64  
 0.64  
 0.64  
 0.64  
 0.64  
 0.64  
 0.64  
 0.64  
 0.64  
 0.64  
 0.64  
 0.64  
 0.64  
 0.64  
 0.64  
 0.64  
 0.64

| Original gene set ID | Original gene set description                                     | Nominal P value |
|----------------------|-------------------------------------------------------------------|-----------------|
| ENSG00000070501      | POLB PPI subnetwork                                               | 0.64            |
| ENSG00000129675      | ARHGEF6 PPI subnetwork                                            | 0.64            |
| MP:0009642           | abnormal blood homeostasis                                        | 0.64            |
| ENSG00000073756      | PTGS2 PPI subnetwork                                              | 0.64            |
| ENSG00000117650      | NEK2 PPI subnetwork                                               | 0.64            |
| ENSG00000131153      | GINS2 PPI subnetwork                                              | 0.64            |
| GO:0001727           | lipid kinase activity                                             | 0.64            |
| MP:0000159           | abnormal xiphoid process morphology                               | 0.64            |
| ENSG00000135390      | ATP5G2 PPI subnetwork                                             | 0.64            |
| ENSG00000198626      | RYR2 PPI subnetwork                                               | 0.64            |
| GO:0015932           | nucleobase-containing compound transmembrane transporter activity | 0.64            |
| GO:0071013           | catalytic step 2 spliceosome                                      | 0.64            |
| ENSG00000125166      | GOT2 PPI subnetwork                                               | 0.64            |
| GO:0045429           | positive regulation of nitric oxide biosynthetic process          | 0.64            |
| GO:0042472           | inner ear morphogenesis                                           | 0.64            |
| GO:0042491           | auditory receptor cell differentiation                            | 0.64            |
| GO:0045995           | regulation of embryonic development                               | 0.64            |
| GO:0051085           | chaperone mediated protein folding requiring cofactor             | 0.64            |
| GO:0007015           | actin filament organization                                       | 0.64            |
| ENSG00000139269      | INHBE PPI subnetwork                                              | 0.64            |
| ENSG00000181222      | POLR2A PPI subnetwork                                             | 0.64            |
| ENSG00000126583      | PRKCG PPI subnetwork                                              | 0.64            |
| ENSG00000185721      | DRG1 PPI subnetwork                                               | 0.64            |
| ENSG00000211456      | SACM1L PPI subnetwork                                             | 0.64            |
| ENSG00000168490      | PHYHIP PPI subnetwork                                             | 0.64            |
| GO:0050729           | positive regulation of inflammatory response                      | 0.64            |
| GO:0030032           | lamellipodium assembly                                            | 0.64            |
| GO:0034702           | ion channel complex                                               | 0.64            |
| ENSG00000135624      | CCT7 PPI subnetwork                                               | 0.64            |
| GO:0001619           | lysosphingolipid and lysophosphatidic acid receptor activity      | 0.64            |
| GO:0004402           | histone acetyltransferase activity                                | 0.64            |
| MP:0002423           | abnormal mast cell physiology                                     | 0.64            |
| ENSG00000089289      | IGBP1 PPI subnetwork                                              | 0.64            |
| ENSG00000182578      | CSF1R PPI subnetwork                                              | 0.64            |
| MP:0004395           | increased cochlear inner hair cell number                         | 0.64            |
| MP:0005565           | increased blood urea nitrogen level                               | 0.64            |
| GO:0045841           | negative regulation of mitotic metaphase/anaphase transition      | 0.64            |
| ENSG00000134597      | RBMX2 PPI subnetwork                                              | 0.64            |
| ENSG00000206466      | GABBR1 PPI subnetwork                                             | 0.64            |
| ENSG00000204681      | GABBR1 PPI subnetwork                                             | 0.64            |
| ENSG00000206511      | GABBR1 PPI subnetwork                                             | 0.64            |
| GO:0048592           | eye morphogenesis                                                 | 0.64            |
| ENSG00000134470      | IL15RA PPI subnetwork                                             | 0.64            |
| ENSG00000125630      | POLR1B PPI subnetwork                                             | 0.64            |
| MP:0009750           | impaired behavioral response to addictive substance               | 0.64            |
| GO:0048384           | retinoic acid receptor signaling pathway                          | 0.64            |
| GO:0043240           | Fanconi anaemia nuclear complex                                   | 0.64            |
| MP:0003451           | absent olfactory bulb                                             | 0.64            |
| ENSG00000133216      | EPHB2 PPI subnetwork                                              | 0.64            |

| Original gene set ID                                           | Original gene set description                                                        | Nominal P value |
|----------------------------------------------------------------|--------------------------------------------------------------------------------------|-----------------|
| GO:0016712                                                     | oxidoreductase activity, acting on paired donors, with incorporation or reduction of | 0.64            |
| ENSG00000214528                                                | ENSG00000214528 PPI subnetwork                                                       | 0.64            |
| GO:0005758                                                     | mitochondrial intermembrane space                                                    | 0.64            |
| GO:0006900                                                     | membrane budding                                                                     | 0.64            |
| GO:0010878                                                     | cholesterol storage                                                                  | 0.64            |
| ENSG00000109103                                                | UNC119 PPI subnetwork                                                                | 0.64            |
| GO:0019933                                                     | cAMP-mediated signaling                                                              | 0.64            |
| GO:0004889                                                     | acetylcholine-activated cation-selective channel activity                            | 0.64            |
| MP:0000371                                                     | diluted coat color                                                                   | 0.64            |
| REACTOME_INTEGRATION_OF_ENERGY_METABOLISM                      | REACTOME_INTEGRATION_OF_ENERGY_METABOLISM                                            | 0.64            |
| ENSG00000145623                                                | OSMR PPI subnetwork                                                                  | 0.64            |
| ENSG00000137070                                                | IL11RA PPI subnetwork                                                                | 0.64            |
| GO:0016874                                                     | ligase activity                                                                      | 0.64            |
| MP:0002102                                                     | abnormal ear morphology                                                              | 0.64            |
| GO:0090092                                                     | regulation of transmembrane receptor protein serine/threonine kinase signaling pat   | 0.64            |
| KEGG_CHEMOKINE_SIGNALING_PATHWAY                               | KEGG_CHEMOKINE_SIGNALING_PATHWAY                                                     | 0.64            |
| GO:0042094                                                     | interleukin-2 biosynthetic process                                                   | 0.64            |
| GO:0009164                                                     | nucleoside catabolic process                                                         | 0.64            |
| GO:0021795                                                     | cerebral cortex cell migration                                                       | 0.64            |
| GO:0000780                                                     | condensed nuclear chromosome, centromeric region                                     | 0.64            |
| GO:0045666                                                     | positive regulation of neuron differentiation                                        | 0.64            |
| ENSG00000092853                                                | CLSPN PPI subnetwork                                                                 | 0.64            |
| ENSG00000129354                                                | AP1M2 PPI subnetwork                                                                 | 0.64            |
| ENSG00000141380                                                | SS18 PPI subnetwork                                                                  | 0.64            |
| GO:0002089                                                     | lens morphogenesis in camera-type eye                                                | 0.64            |
| REACTOME_RNA_POLYMERASE_I_PROMOTER_ESCAPE                      | REACTOME_RNA_POLYMERASE_I_PROMOTER_ESCAPE                                            | 0.64            |
| REACTOME_REGULATORY_RNA_PATHWAYS                               | REACTOME_REGULATORY_RNA_PATHWAYS                                                     | 0.64            |
| REACTOME_MICRORNA_MIRNA_BIOGENESIS                             | REACTOME_MICRORNA_MIRNA_BIOGENESIS                                                   | 0.64            |
| MP:0004765                                                     | decreased brainstem auditory evoked potentia                                         | 0.64            |
| REACTOME_FORMATION_OF_TUBULIN_FOLDING_INTERMEDIATES_BY_CCTTRIC | REACTOME_FORMATION_OF_TUBULIN_FOLDING_INTERMEDIATES_BY_CCTTRIC                       | 0.64            |
| GO:0022890                                                     | inorganic cation transmembrane transporter activity                                  | 0.64            |
| MP:0001297                                                     | microphthalmia                                                                       | 0.65            |
| MP:0001183                                                     | overexpanded pulmonary alveoli                                                       | 0.65            |
| MP:0004046                                                     | abnormal mitosis                                                                     | 0.65            |
| GO:0043204                                                     | perikaryon                                                                           | 0.65            |
| ENSG00000143093                                                | FAM40A PPI subnetwork                                                                | 0.65            |
| GO:0045667                                                     | regulation of osteoblast differentiation                                             | 0.65            |
| GO:0001708                                                     | cell fate specification                                                              | 0.65            |
| GO:0007616                                                     | long-term memory                                                                     | 0.65            |
| ENSG00000129465                                                | RIPK3 PPI subnetwork                                                                 | 0.65            |
| MP:0005558                                                     | decreased creatinine clearance                                                       | 0.65            |
| GO:0007501                                                     | mesodermal cell fate specification                                                   | 0.65            |
| ENSG00000007171                                                | NOS2 PPI subnetwork                                                                  | 0.65            |
| KEGG_VASCULAR_SMOOTH_MUSCLE_CONTRACTION                        | KEGG_VASCULAR_SMOOTH_MUSCLE_CONTRACTION                                              | 0.65            |
| MP:0004324                                                     | vestibular hair cell degeneration                                                    | 0.65            |
| KEGG_ALLOGRAFT_REJECTION                                       | KEGG_ALLOGRAFT_REJECTION                                                             | 0.65            |
| MP:0002023                                                     | B cell derived lymphoma                                                              | 0.65            |
| ENSG00000166592                                                | RRAD PPI subnetwork                                                                  | 0.65            |
| MP:0001783                                                     | decreased white adipose tissue amount                                                | 0.65            |



| Original gene set ID                               | Original gene set description                                                | Nominal P value |
|----------------------------------------------------|------------------------------------------------------------------------------|-----------------|
| ENSG00000182492                                    | BGN PPI subnetwork                                                           | 0.65            |
| GO:0019843                                         | rRNA binding                                                                 | 0.65            |
| GO:0000301                                         | retrograde transport, vesicle recycling within Golg                          | 0.65            |
| GO:0060395                                         | SMAD protein signal transduction                                             | 0.65            |
| GO:0071804                                         | cellular potassium ion transport                                             | 0.65            |
| GO:0071805                                         | potassium ion transmembrane transport                                        | 0.65            |
| GO:0048562                                         | embryonic organ morphogenesis                                                | 0.65            |
| GO:0048661                                         | positive regulation of smooth muscle cell proliferati                        | 0.65            |
| MP:0002971                                         | abnormal brown adipose tissue morphology                                     | 0.65            |
| GO:0061025                                         | membrane fusion                                                              | 0.65            |
| ENSG00000119772                                    | DNMT3A PPI subnetwork                                                        | 0.65            |
| ENSG00000130255                                    | RPL36 PPI subnetwork                                                         | 0.65            |
| REACTOME_REMOVAL_OF_LICENSING_FACTORS_FROM_ORIGINS | REACTOME_REMOVAL_OF_LICENSING_FACTORS_FROM_ORIGINS                           | 0.65            |
| MP:0002810                                         | microcytic anemia                                                            | 0.65            |
| GO:0019866                                         | organelle inner membrane                                                     | 0.65            |
| ENSG00000092010                                    | PSME1 PPI subnetwork                                                         | 0.65            |
| GO:0045786                                         | negative regulation of cell cycle                                            | 0.65            |
| ENSG00000008952                                    | SEC62 PPI subnetwork                                                         | 0.65            |
| ENSG00000185436                                    | IL28RA PPI subnetwork                                                        | 0.65            |
| GO:0043028                                         | cysteine-type endopeptidase regulator activity involved in apoptotic proces: | 0.65            |
| GO:0004114                                         | 3',5'-cyclic-nucleotide phosphodiesterase activity                           | 0.65            |
| GO:0008083                                         | growth factor activity                                                       | 0.65            |
| ENSG00000116678                                    | LEPR PPI subnetwork                                                          | 0.65            |
| ENSG00000100813                                    | ACIN1 PPI subnetwork                                                         | 0.65            |
| GO:0015026                                         | coreceptor activity                                                          | 0.65            |
| KEGG_ARACHIDONIC_ACID_METABOLISM                   | KEGG_ARACHIDONIC_ACID_METABOLISM                                             | 0.65            |
| MP:0003503                                         | decreased activity of thyroid                                                | 0.65            |
| ENSG00000110321                                    | EIF4G2 PPI subnetwork                                                        | 0.65            |
| ENSG00000133818                                    | RRAS2 PPI subnetwork                                                         | 0.65            |
| ENSG00000143995                                    | MEIS1 PPI subnetwork                                                         | 0.65            |
| MP:0008497                                         | decreased IgG2b level                                                        | 0.65            |
| GO:0000315                                         | organellar large ribosomal subunit                                           | 0.65            |
| GO:0005762                                         | mitochondrial large ribosomal subunit                                        | 0.65            |
| GO:0060389                                         | pathway-restricted SMAD protein phosphorylation                              | 0.65            |
| GO:0002011                                         | morphogenesis of an epithelial sheet                                         | 0.65            |
| ENSG00000169282                                    | KCNAB1 PPI subnetwork                                                        | 0.65            |
| GO:0034341                                         | response to interferon-gamma                                                 | 0.65            |
| ENSG00000132467                                    | UTP3 PPI subnetwork                                                          | 0.65            |
| ENSG00000100941                                    | PNN PPI subnetwork                                                           | 0.65            |
| GO:0048593                                         | camera-type eye morphogenesis                                                | 0.65            |
| ENSG00000174371                                    | EXO1 PPI subnetwork                                                          | 0.65            |
| GO:0010885                                         | regulation of cholesterol storage                                            | 0.65            |
| ENSG00000093217                                    | XYLB PPI subnetwork                                                          | 0.65            |
| ENSG00000163904                                    | SEN2 PPI subnetwork                                                          | 0.65            |
| ENSG00000100568                                    | VTI1B PPI subnetwork                                                         | 0.65            |
| GO:0009267                                         | cellular response to starvation                                              | 0.65            |
| GO:0035587                                         | purinergic receptor signaling pathway                                        | 0.65            |
| MP:0008587                                         | short photoreceptor outer segment                                            | 0.65            |
| ENSG00000171549                                    | ENSG00000171549 PPI subnetwork                                               | 0.65            |

| Original gene set ID                                        | Original gene set description                                  | Nominal P value |
|-------------------------------------------------------------|----------------------------------------------------------------|-----------------|
| ENSG00000182520                                             | ENSG00000182520 PPI subnetwork                                 | 0.65            |
| MP:0000967                                                  | abnormal sensory neuron projections                            | 0.66            |
| GO:0051186                                                  | cofactor metabolic process                                     | 0.66            |
| ENSG00000058668                                             | ATP2B4 PPI subnetwork                                          | 0.66            |
| ENSG00000161547                                             | SRSF2 PPI subnetwork                                           | 0.66            |
| MP:0004784                                                  | abnormal anterior cardinal vein morphology                     | 0.66            |
| ENSG00000096401                                             | CDC5L PPI subnetwork                                           | 0.66            |
| GO:0042026                                                  | protein refolding                                              | 0.66            |
| ENSG00000163191                                             | S100A11 PPI subnetwork                                         | 0.66            |
| ENSG00000159113                                             | ENSG00000159113 PPI subnetwork                                 | 0.66            |
| REACTOME_APCCCDH1_MEDIATED_DEGRADATION_OF_CDC20_AND_OTHER_A | REACTOME_APCCCDH1_MEDIATED_DEGRADATION_OF_CDC20_AND_OTHER_APCC | 0.66            |
| ENSG00000139343                                             | SNRPF PPI subnetwork                                           | 0.66            |
| GO:0090102                                                  | cochlea development                                            | 0.66            |
| GO:0008565                                                  | protein transporter activity                                   | 0.66            |
| GO:0001664                                                  | G-protein coupled receptor binding                             | 0.66            |
| ENSG00000183691                                             | NOG PPI subnetwork                                             | 0.66            |
| GO:0019005                                                  | SCF ubiquitin ligase complex                                   | 0.66            |
| GO:0042474                                                  | middle ear morphogenesis                                       | 0.66            |
| ENSG000000004700                                            | RECQL PPI subnetwork                                           | 0.66            |
| REACTOME_PYRIMIDINE_METABOLISM                              | REACTOME_PYRIMIDINE_METABOLISM                                 | 0.66            |
| MP:0003084                                                  | abnormal skeletal muscle fiber morphology                      | 0.66            |
| GO:0009952                                                  | anterior/posterior pattern specification                       | 0.66            |
| GO:0016072                                                  | rRNA metabolic process                                         | 0.66            |
| GO:0031331                                                  | positive regulation of cellular catabolic process              | 0.66            |
| ENSG00000127314                                             | RAP1B PPI subnetwork                                           | 0.66            |
| GO:0048839                                                  | inner ear development                                          | 0.66            |
| GO:0050767                                                  | regulation of neurogenesis                                     | 0.66            |
| ENSG00000125730                                             | C3 PPI subnetwork                                              | 0.66            |
| GO:0010035                                                  | response to inorganic substance                                | 0.66            |
| GO:0009615                                                  | response to virus                                              | 0.66            |
| ENSG00000108883                                             | EFTUD2 PPI subnetwork                                          | 0.66            |
| GO:0018345                                                  | protein palmitoylation                                         | 0.66            |
| MP:0002664                                                  | decreased circulating adrenocorticotropin leve                 | 0.66            |
| ENSG00000112186                                             | CAP2 PPI subnetwork                                            | 0.66            |
| ENSG00000159459                                             | UBR1 PPI subnetwork                                            | 0.66            |
| ENSG00000131652                                             | THOC6 PPI subnetwork                                           | 0.66            |
| ENSG00000065548                                             | ZC3H15 PPI subnetwork                                          | 0.66            |
| GO:0009798                                                  | axis specification                                             | 0.66            |
| ENSG00000027697                                             | IFNGR1 PPI subnetwork                                          | 0.66            |
| GO:0009314                                                  | response to radiation                                          | 0.66            |
| GO:0000777                                                  | condensed chromosome kinetochore                               | 0.66            |
| MP:0002835                                                  | abnormal cranial suture morphology                             | 0.66            |
| MP:0005205                                                  | abnormal eye anterior chamber morphology                       | 0.66            |
| ENSG00000179950                                             | PUF60 PPI subnetwork                                           | 0.66            |
| GO:0071779                                                  | G1/S transition checkpoint                                     | 0.66            |
| GO:0043087                                                  | regulation of GTPase activity                                  | 0.66            |
| GO:0072372                                                  | primary cilium                                                 | 0.66            |
| GO:0001841                                                  | neural tube formation                                          | 0.66            |
| ENSG00000169306                                             | IL1RAPL1 PPI subnetwork                                        | 0.66            |



| Original gene set ID                                        | Original gene set description                                                         | Nominal P value |
|-------------------------------------------------------------|---------------------------------------------------------------------------------------|-----------------|
| MP:0002703                                                  | abnormal renal tubule morphology                                                      | 0.66            |
| GO:0002062                                                  | chondrocyte differentiation                                                           | 0.67            |
| ENSG000000100644                                            | HIF1A PPI subnetwork                                                                  | 0.67            |
| GO:0051258                                                  | protein polymerization                                                                | 0.67            |
| ENSG000000114745                                            | GORASP1 PPI subnetwork                                                                | 0.67            |
| ENSG000000144381                                            | HSPD1 PPI subnetwork                                                                  | 0.67            |
| GO:0009124                                                  | nucleoside monophosphate biosynthetic process                                         | 0.67            |
| ENSG000000159128                                            | IFNGR2 PPI subnetwork                                                                 | 0.67            |
| GO:0000216                                                  | M/G1 transition of mitotic cell cycle                                                 | 0.67            |
| ENSG000000154277                                            | UCHL1 PPI subnetwork                                                                  | 0.67            |
| ENSG000000170624                                            | SGCD PPI subnetwork                                                                   | 0.67            |
| GO:0033151                                                  | V(D)J recombination                                                                   | 0.67            |
| GO:0016254                                                  | preassembly of GPI anchor in ER membrane                                              | 0.67            |
| ENSG000000151693                                            | ASAP2 PPI subnetwork                                                                  | 0.67            |
| GO:0030216                                                  | keratinocyte differentiation                                                          | 0.67            |
| MP:0002823                                                  | abnormal rib development                                                              | 0.67            |
| ENSG000000095261                                            | PSMD5 PPI subnetwork                                                                  | 0.67            |
| GO:0030041                                                  | actin filament polymerization                                                         | 0.67            |
| GO:0021903                                                  | rostrocaudal neural tube patterning                                                   | 0.67            |
| ENSG000000070831                                            | CDC42 PPI subnetwork                                                                  | 0.67            |
| ENSG000000165912                                            | PACSN3 PPI subnetwork                                                                 | 0.67            |
| ENSG000000187741                                            | FANCA PPI subnetwork                                                                  | 0.67            |
| GO:0006766                                                  | vitamin metabolic process                                                             | 0.67            |
| GO:0070167                                                  | regulation of biomineral tissue development                                           | 0.67            |
| GO:0051597                                                  | response to methylmercury                                                             | 0.67            |
| KEGG_TASTE_TRANSDUCTION                                     | KEGG_TASTE_TRANSDUCTION                                                               | 0.67            |
| ENSG000000175582                                            | RAB6A PPI subnetwork                                                                  | 0.67            |
| KEGG_TYROSINE_METABOLISM                                    | KEGG_TYROSINE_METABOLISM                                                              | 0.67            |
| GO:0048736                                                  | appendage development                                                                 | 0.67            |
| GO:0060173                                                  | limb development                                                                      | 0.67            |
| ENSG000000100380                                            | ST13 PPI subnetwork                                                                   | 0.67            |
| GO:0030663                                                  | COPI coated vesicle membrane                                                          | 0.67            |
| REACTOME_CDC20PHOSPHO:APCC_MEDIATED_DEGRADATION_OF_CYCLIN_A | REACTOME_CDC20PHOSPHO:APCC_MEDIATED_DEGRADATION_OF_CYCLIN_A                           | 0.67            |
| GO:0055074                                                  | calcium ion homeostasis                                                               | 0.67            |
| GO:0042471                                                  | ear morphogenesis                                                                     | 0.67            |
| GO:0007067                                                  | mitosis                                                                               | 0.67            |
| GO:0000280                                                  | nuclear division                                                                      | 0.67            |
| ENSG000000186051                                            | TAL2 PPI subnetwork                                                                   | 0.67            |
| GO:0009066                                                  | aspartate family amino acid metabolic process                                         | 0.67            |
| GO:0009950                                                  | dorsal/ventral axis specification                                                     | 0.67            |
| ENSG000000074800                                            | ENO1 PPI subnetwork                                                                   | 0.67            |
| GO:0016811                                                  | hydrolase activity, acting on carbon-nitrogen (but not peptide) bonds, in linear amid | 0.67            |
| MP:0000733                                                  | abnormal muscle development                                                           | 0.67            |
| GO:0007595                                                  | lactation                                                                             | 0.67            |
| KEGG_AMINO_SUGAR_AND_NUCLEOTIDE_SUGAR_METABOLISM            | KEGG_AMINO_SUGAR_AND_NUCLEOTIDE_SUGAR_METABOLISM                                      | 0.67            |
| ENSG000000074211                                            | PPP2R2C PPI subnetwork                                                                | 0.67            |
| ENSG000000147889                                            | CDKN2A PPI subnetwork                                                                 | 0.67            |
| MP:0001944                                                  | abnormal pancreas morphology                                                          | 0.67            |
| ENSG000000147684                                            | NDUFB9 PPI subnetwork                                                                 | 0.67            |



| Original gene set ID                    | Original gene set description                                    | Nominal P value |
|-----------------------------------------|------------------------------------------------------------------|-----------------|
| ENSG00000068654                         | POLR1A PPI subnetwork                                            | 0.67            |
| REACTOME_METABOLISM_OF_POLYAMINES       | REACTOME_METABOLISM_OF_POLYAMINES                                | 0.67            |
| GO:0000087                              | M phase of mitotic cell cycle                                    | 0.67            |
| GO:0007158                              | neuron cell-cell adhesion                                        | 0.67            |
| GO:0032452                              | histone demethylase activity                                     | 0.67            |
| GO:0046519                              | sphingoid metabolic process                                      | 0.67            |
| MP:0002591                              | decreased mean corpuscular volume                                | 0.67            |
| ENSG000000120149                        | MSX2 PPI subnetwork                                              | 0.67            |
| MP:0004772                              | abnormal bile secretion                                          | 0.67            |
| GO:0032844                              | regulation of homeostatic process                                | 0.67            |
| MP:0002916                              | increased synaptic depression                                    | 0.67            |
| MP:0004321                              | short sternum                                                    | 0.67            |
| ENSG000000172137                        | CALB2 PPI subnetwork                                             | 0.67            |
| ENSG000000101400                        | SNTA1 PPI subnetwork                                             | 0.67            |
| GO:0016597                              | amino acid binding                                               | 0.67            |
| ENSG00000069248                         | NUP133 PPI subnetwork                                            | 0.67            |
| REACTOME_G:PROTEIN_BETAGAMMA_SIGNALLING | REACTOME_G:PROTEIN_BETAGAMMA_SIGNALLING                          | 0.67            |
| GO:0005778                              | peroxisomal membrane                                             | 0.67            |
| GO:0031903                              | microbody membrane                                               | 0.67            |
| GO:0004950                              | chemokine receptor activity                                      | 0.67            |
| GO:0001637                              | G-protein coupled chemoattractant receptor activity              | 0.67            |
| ENSG000000137936                        | BCAR3 PPI subnetwork                                             | 0.67            |
| GO:0051890                              | regulation of cardioblast differentiation                        | 0.67            |
| ENSG000000057608                        | GDI2 PPI subnetwork                                              | 0.67            |
| GO:0035326                              | enhancer binding                                                 | 0.67            |
| GO:0060627                              | regulation of vesicle-mediated transport                         | 0.67            |
| MP:0003604                              | single kidney                                                    | 0.67            |
| REACTOME_SIGNALING_BY_EGFR_IN_CANCER    | REACTOME_SIGNALING_BY_EGFR_IN_CANCER                             | 0.67            |
| GO:0001659                              | temperature homeostasis                                          | 0.67            |
| ENSG00000076924                         | XAB2 PPI subnetwork                                              | 0.67            |
| MP:0005344                              | increased circulating bilirubin level                            | 0.67            |
| ENSG000000082458                        | DLG3 PPI subnetwork                                              | 0.67            |
| ENSG000000169016                        | E2F6 PPI subnetwork                                              | 0.67            |
| GO:0005164                              | tumor necrosis factor receptor binding                           | 0.67            |
| GO:0000407                              | pre-autophagosomal structure                                     | 0.67            |
| MP:0001176                              | abnormal lung development                                        | 0.67            |
| GO:0000041                              | transition metal ion transport                                   | 0.67            |
| GO:0007194                              | negative regulation of adenylate cyclase activity                | 0.67            |
| GO:0031280                              | negative regulation of cyclase activity                          | 0.67            |
| ENSG000000055163                        | CYFIP2 PPI subnetwork                                            | 0.67            |
| GO:0001707                              | mesoderm formation                                               | 0.67            |
| GO:0030832                              | regulation of actin filament length                              | 0.67            |
| ENSG000000114942                        | EEF1B2 PPI subnetwork                                            | 0.67            |
| ENSG000000094914                        | AAAS PPI subnetwork                                              | 0.67            |
| GO:0002717                              | positive regulation of natural killer cell mediated immunity     | 0.67            |
| GO:0045954                              | positive regulation of natural killer cell mediated cytotoxicity | 0.67            |
| ENSG000000123496                        | IL13RA2 PPI subnetwork                                           | 0.67            |
| ENSG000000164485                        | IL22RA2 PPI subnetwork                                           | 0.67            |
| ENSG000000103522                        | IL21R PPI subnetwork                                             | 0.67            |

| <b>Original gene set ID</b>                                    | <b>Original gene set description</b>                               | <b>Nominal P value</b> |
|----------------------------------------------------------------|--------------------------------------------------------------------|------------------------|
| ENSG00000076944                                                | STXBP2 PPI subnetwork                                              | 0.67                   |
| MP:0008392                                                     | decreased primordial germ cell number                              | 0.67                   |
| MP:0003921                                                     | abnormal heart left ventricle morphology                           | 0.67                   |
| MP:0003446                                                     | renal hypoplasia                                                   | 0.67                   |
| ENSG00000136603                                                | SKIL PPI subnetwork                                                | 0.67                   |
| ENSG00000147162                                                | OGT PPI subnetwork                                                 | 0.67                   |
| GO:0048286                                                     | lung alveolus development                                          | 0.67                   |
| GO:0033003                                                     | regulation of mast cell activation                                 | 0.67                   |
| GO:0055007                                                     | cardiac muscle cell differentiation                                | 0.67                   |
| REACTOME_STABILIZATION_OF_P53                                  | REACTOME_STABILIZATION_OF_P53                                      | 0.67                   |
| MP:0003797                                                     | abnormal compact bone morphology                                   | 0.67                   |
| ENSG00000105204                                                | DYRK1B PPI subnetwork                                              | 0.67                   |
| GO:0071214                                                     | cellular response to abiotic stimulus                              | 0.67                   |
| REACTOME_NITRIC_OXIDE_STIMULATES_GUANYLATE_CYCLASE             | REACTOME_NITRIC_OXIDE_STIMULATES_GUANYLATE_CYCLASE                 | 0.67                   |
| REACTOME_POSTSYNAPTIC_NICOTINIC_ACETYLCHOLINE_RECEPTORS        | REACTOME_POSTSYNAPTIC_NICOTINIC_ACETYLCHOLINE_RECEPTORS            | 0.67                   |
| REACTOME_ACETYLCHOLINE_BINDING_AND_DOWNSTREAM_EVENTS           | REACTOME_ACETYLCHOLINE_BINDING_AND_DOWNSTREAM_EVENTS               | 0.67                   |
| REACTOME_ACTIVATION_OF_NICOTINIC_ACETYLCHOLINE_RECEPTORS       | REACTOME_ACTIVATION_OF_NICOTINIC_ACETYLCHOLINE_RECEPTORS           | 0.67                   |
| GO:0003170                                                     | heart valve development                                            | 0.67                   |
| GO:0010817                                                     | regulation of hormone levels                                       | 0.67                   |
| REACTOME_REGULATION_OF_MRNA_STABILITY_BY_PROTEINS_THAT_BIND_AU | REACTOME_REGULATION_OF_MRNA_STABILITY_BY_PROTEINS_THAT_BIND_AU:RIB | 0.67                   |
| ENSG00000104325                                                | DECR1 PPI subnetwork                                               | 0.67                   |
| GO:0033124                                                     | regulation of GTP catabolic process                                | 0.67                   |
| GO:0051350                                                     | negative regulation of lyase activity                              | 0.67                   |
| KEGG_RENIN_ANGIOTENSIN_SYSTEM                                  | KEGG_RENIN_ANGIOTENSIN_SYSTEM                                      | 0.67                   |
| GO:0010038                                                     | response to metal ion                                              | 0.67                   |
| ENSG00000163631                                                | ALB PPI subnetwork                                                 | 0.67                   |
| ENSG00000104897                                                | SF3A2 PPI subnetwork                                               | 0.67                   |
| ENSG00000163806                                                | SPDYA PPI subnetwork                                               | 0.67                   |
| MP:0004404                                                     | cochlear outer hair cell degeneration                              | 0.67                   |
| REACTOME_PLATELET_ADHESION_TO_EXPOSED_COLLAGEN                 | REACTOME_PLATELET_ADHESION_TO_EXPOSED_COLLAGEN                     | 0.67                   |
| GO:0030530                                                     | heterogeneous nuclear ribonucleoprotein complex                    | 0.67                   |
| ENSG00000066117                                                | SMARCD1 PPI subnetwork                                             | 0.67                   |
| GO:0008094                                                     | DNA-dependent ATPase activity                                      | 0.67                   |
| GO:0006013                                                     | mannose metabolic process                                          | 0.67                   |
| GO:0043200                                                     | response to amino acid stimulus                                    | 0.67                   |
| MP:0005553                                                     | increased circulating creatinine level                             | 0.67                   |
| ENSG00000011052                                                | NME2 PPI subnetwork                                                | 0.67                   |
| ENSG00000179051                                                | RCC2 PPI subnetwork                                                | 0.68                   |
| MP:0001077                                                     | abnormal spinal nerve morphology                                   | 0.68                   |
| GO:0035107                                                     | appendage morphogenesis                                            | 0.68                   |
| GO:0035108                                                     | limb morphogenesis                                                 | 0.68                   |
| GO:0005942                                                     | phosphatidylinositol 3-kinase complex                              | 0.68                   |
| GO:0072384                                                     | organelle transport along microtubule                              | 0.68                   |
| GO:0006520                                                     | cellular amino acid metabolic process                              | 0.68                   |
| GO:0090068                                                     | positive regulation of cell cycle process                          | 0.68                   |
| MP:0008498                                                     | decreased IgG3 level                                               | 0.68                   |
| ENSG00000182979                                                | MTA1 PPI subnetwork                                                | 0.68                   |
| GO:0048285                                                     | organelle fission                                                  | 0.68                   |
| ENSG00000101161                                                | PRPF6 PPI subnetwork                                               | 0.68                   |



| Original gene set ID              | Original gene set description                                                     | Nominal P value |
|-----------------------------------|-----------------------------------------------------------------------------------|-----------------|
| GO:0043648                        | dicarboxylic acid metabolic process                                               | 0.68            |
| ENSG00000140795                   | MYLK3 PPI subnetwork                                                              | 0.68            |
| GO:0030512                        | negative regulation of transforming growth factor beta receptor signaling pathway | 0.68            |
| ENSG00000133243                   | BTBD2 PPI subnetwork                                                              | 0.68            |
| GO:0015077                        | monovalent inorganic cation transmembrane transporter activity                    | 0.68            |
| GO:0003151                        | outflow tract morphogenesis                                                       | 0.68            |
| ENSG000000085840                  | ORC1 PPI subnetwork                                                               | 0.68            |
| GO:0009123                        | nucleoside monophosphate metabolic process                                        | 0.68            |
| ENSG00000130204                   | TOMM40 PPI subnetwork                                                             | 0.68            |
| ENSG00000120708                   | TGFBI PPI subnetwork                                                              | 0.68            |
| ENSG00000165392                   | WRN PPI subnetwork                                                                | 0.68            |
| ENSG00000081985                   | IL12RB2 PPI subnetwork                                                            | 0.68            |
| ENSG00000175029                   | CTBP2 PPI subnetwork                                                              | 0.68            |
| MP:0002813                        | microcytosis                                                                      | 0.68            |
| GO:0019898                        | extrinsic to membrane                                                             | 0.68            |
| ENSG00000206267                   | ENSG00000206267 PPI subnetwork                                                    | 0.68            |
| ENSG00000204351                   | SKIV2L PPI subnetwork                                                             | 0.68            |
| ENSG00000076242                   | MLH1 PPI subnetwork                                                               | 0.68            |
| ENSG00000076554                   | TPD52 PPI subnetwork                                                              | 0.68            |
| ENSG00000006451                   | RALA PPI subnetwork                                                               | 0.68            |
| GO:0007076                        | mitotic chromosome condensation                                                   | 0.68            |
| GO:0033762                        | response to glucagon stimulus                                                     | 0.68            |
| ENSG00000173805                   | HAP1 PPI subnetwork                                                               | 0.68            |
| ENSG00000206495                   | TRIM39 PPI subnetwork                                                             | 0.68            |
| ENSG00000206419                   | ENSG00000206419 PPI subnetwork                                                    | 0.68            |
| ENSG00000204599                   | TRIM39 PPI subnetwork                                                             | 0.68            |
| GO:0019905                        | syntaxin binding                                                                  | 0.68            |
| GO:0061351                        | neural precursor cell proliferation                                               | 0.68            |
| ENSG00000079950                   | STX7 PPI subnetwork                                                               | 0.68            |
| MP:0000242                        | impaired fertilization                                                            | 0.68            |
| REACTOME_GABA_RECEPTOR_ACTIVATION | REACTOME_GABA_RECEPTOR_ACTIVATION                                                 | 0.68            |
| ENSG00000206407                   | ENSG00000206407 PPI subnetwork                                                    | 0.68            |
| ENSG00000204569                   | PPP1R10 PPI subnetwork                                                            | 0.68            |
| ENSG00000206489                   | PPP1R10 PPI subnetwork                                                            | 0.68            |
| GO:0006266                        | DNA ligation                                                                      | 0.68            |
| GO:2000179                        | positive regulation of neural precursor cell proliferation                        | 0.68            |
| GO:0044439                        | peroxisomal part                                                                  | 0.69            |
| GO:0044438                        | microbody part                                                                    | 0.69            |
| MP:0002626                        | increased heart rate                                                              | 0.69            |
| ENSG00000007392                   | LUC7L PPI subnetwork                                                              | 0.69            |
| GO:0060562                        | epithelial tube morphogenesis                                                     | 0.69            |
| ENSG00000101811                   | CSTF2 PPI subnetwork                                                              | 0.69            |
| ENSG00000121741                   | ZMYM2 PPI subnetwork                                                              | 0.69            |
| GO:0009896                        | positive regulation of catabolic process                                          | 0.69            |
| GO:0031341                        | regulation of cell killing                                                        | 0.69            |
| GO:0005759                        | mitochondrial matrix                                                              | 0.69            |
| GO:0030659                        | cytoplasmic vesicle membrane                                                      | 0.69            |
| ENSG00000131724                   | IL13RA1 PPI subnetwork                                                            | 0.69            |
| KEGG_GLYCEROL_METABOLISM          | KEGG_GLYCEROL_METABOLISM                                                          | 0.69            |

| Original gene set ID                         | Original gene set description                                  | Nominal P value |
|----------------------------------------------|----------------------------------------------------------------|-----------------|
| MP:0008663                                   | increased interleukin-12 secretion                             | 0.69            |
| ENSG00000173418                              | NAA20 PPI subnetwork                                           | 0.69            |
| GO:0010573                                   | vascular endothelial growth factor production                  | 0.69            |
| GO:0010574                                   | regulation of vascular endothelial growth factor productior    | 0.69            |
| ENSG00000206353                              | SKIV2L PPI subnetwork                                          | 0.69            |
| ENSG00000138814                              | PPP3CA PPI subnetwork                                          | 0.69            |
| MP:0004096                                   | abnormal midbrain-hindbrain boundary development               | 0.69            |
| GO:0009880                                   | embryonic pattern specification                                | 0.69            |
| ENSG00000127616                              | SMARCA4 PPI subnetwork                                         | 0.69            |
| ENSG00000153046                              | CDYL PPI subnetwork                                            | 0.69            |
| MP:0006036                                   | abnormal mitochondrial physiology                              | 0.69            |
| GO:0007214                                   | gamma-aminobutyric acid signaling pathway                      | 0.69            |
| GO:0021987                                   | cerebral cortex development                                    | 0.69            |
| MP:0005608                                   | cardiac interstitial fibrosis                                  | 0.69            |
| MP:0004532                                   | abnormal inner hair cell stereociliary bundle morphology       | 0.69            |
| ENSG00000079102                              | RUNX1T1 PPI subnetwork                                         | 0.69            |
| GO:0042490                                   | mechanoreceptor differentiation                                | 0.69            |
| GO:0016045                                   | detection of bacterium                                         | 0.69            |
| GO:0015985                                   | energy coupled proton transport, down electrochemical gradient | 0.69            |
| GO:0015986                                   | ATP synthesis coupled proton transport                         | 0.69            |
| MP:0002797                                   | increased thigmotaxis                                          | 0.69            |
| GO:0055003                                   | cardiac myofibril assembly                                     | 0.69            |
| KEGG_O_GLYCAN_BIOSYNTHESIS                   | KEGG_O_GLYCAN_BIOSYNTHESIS                                     | 0.69            |
| ENSG00000011304                              | PTBP1 PPI subnetwork                                           | 0.69            |
| ENSG00000130177                              | CDC16 PPI subnetwork                                           | 0.69            |
| GO:0051247                                   | positive regulation of protein metabolic proces                | 0.69            |
| GO:0048596                                   | embryonic camera-type eye morphogenesis                        | 0.69            |
| MP:0005318                                   | decreased triglyceride level                                   | 0.69            |
| ENSG000000091129                             | NRCAM PPI subnetwork                                           | 0.69            |
| ENSG00000112062                              | MAPK14 PPI subnetwork                                          | 0.69            |
| ENSG00000156374                              | PCGF6 PPI subnetwork                                           | 0.69            |
| ENSG00000142192                              | APP PPI subnetwork                                             | 0.69            |
| ENSG00000116754                              | SRSF11 PPI subnetwork                                          | 0.69            |
| ENSG00000173598                              | NUDT4 PPI subnetwork                                           | 0.69            |
| GO:0030833                                   | regulation of actin filament polymerization                    | 0.69            |
| GO:0060560                                   | developmental growth involved in morphogenesis                 | 0.69            |
| ENSG000000005156                             | LIG3 PPI subnetwork                                            | 0.69            |
| ENSG00000124422                              | USP22 PPI subnetwork                                           | 0.69            |
| MP:0005403                                   | abnormal nerve conduction                                      | 0.69            |
| ENSG00000178896                              | EXOSC4 PPI subnetwork                                          | 0.69            |
| ENSG00000132535                              | DLG4 PPI subnetwork                                            | 0.69            |
| GO:0045649                                   | regulation of macrophage differentiation                       | 0.69            |
| GO:0090307                                   | spindle assembly involved in mitosis                           | 0.69            |
| GO:0043279                                   | response to alkaloid                                           | 0.69            |
| MP:0000432                                   | abnormal head morphology                                       | 0.69            |
| REACTOME_AUTODEGRADATION_OF_CDH1_BY_CDH1APCC | REACTOME_AUTODEGRADATION_OF_CDH1_BY_CDH1APCC                   | 0.69            |
| ENSG00000172943                              | PHF8 PPI subnetwork                                            | 0.69            |
| GO:0031674                                   | I band                                                         | 0.69            |
| ENSG00000139436                              | GIT2 PPI subnetwork                                            | 0.69            |

| Original gene set ID                                          | Original gene set description                                               | Nominal P value |
|---------------------------------------------------------------|-----------------------------------------------------------------------------|-----------------|
| ENSG00000029363                                               | BCLAF1 PPI subnetwork                                                       | 0.69            |
| GO:0010575                                                    | positive regulation vascular endothelial growth factor productior           | 0.69            |
| ENSG000000130382                                              | MLLT1 PPI subnetwork                                                        | 0.69            |
| ENSG000000177733                                              | HNRNPA0 PPI subnetwork                                                      | 0.69            |
| ENSG000000111802                                              | TDP2 PPI subnetwork                                                         | 0.69            |
| ENSG000000157601                                              | MX1 PPI subnetwork                                                          | 0.69            |
| ENSG000000141959                                              | PFKL PPI subnetwork                                                         | 0.69            |
| GO:0030018                                                    | Z disc                                                                      | 0.69            |
| MP:0006264                                                    | decreased systemic arterial systolic blood pressure                         | 0.69            |
| GO:0021885                                                    | forebrain cell migration                                                    | 0.69            |
| ENSG000000139842                                              | CUL4A PPI subnetwork                                                        | 0.69            |
| GO:0006898                                                    | receptor-mediated endocytosis                                               | 0.69            |
| MP:0005026                                                    | decreased susceptibility to parasitic infectior                             | 0.69            |
| ENSG000000164418                                              | GRIK2 PPI subnetwork                                                        | 0.69            |
| ENSG000000094631                                              | HDAC6 PPI subnetwork                                                        | 0.69            |
| GO:0005892                                                    | acetylcholine-gated channel complex                                         | 0.69            |
| GO:0044440                                                    | endosomal part                                                              | 0.69            |
| ENSG000000117748                                              | RPA2 PPI subnetwork                                                         | 0.69            |
| ENSG000000164611                                              | PTTG1 PPI subnetwork                                                        | 0.69            |
| GO:0035064                                                    | methylated histone residue binding                                          | 0.69            |
| MP:0002914                                                    | abnormal endplate potential                                                 | 0.69            |
| ENSG000000138795                                              | LEF1 PPI subnetwork                                                         | 0.69            |
| GO:0010810                                                    | regulation of cell-substrate adhesion                                       | 0.69            |
| MP:0000748                                                    | progressive muscle weakness                                                 | 0.69            |
| MP:0002929                                                    | abnormal bile duct development                                              | 0.69            |
| GO:0048485                                                    | sympathetic nervous system development                                      | 0.69            |
| GO:0034703                                                    | cation channel complex                                                      | 0.69            |
| ENSG000000067225                                              | PKM2 PPI subnetwork                                                         | 0.69            |
| ENSG000000142453                                              | CARM1 PPI subnetwork                                                        | 0.69            |
| REACTOME_PIP3_ACTIVATES_AKT_SIGNALING                         | REACTOME_PIP3_ACTIVATES_AKT_SIGNALING                                       | 0.69            |
| GO:0045921                                                    | positive regulation of exocytosis                                           | 0.69            |
| GO:0016747                                                    | transferase activity, transferring acyl groups other than amino-acyl group: | 0.69            |
| MP:0000279                                                    | ventricular hypoplasia                                                      | 0.69            |
| MP:0005298                                                    | abnormal clavicle morphology                                                | 0.69            |
| ENSG000000108344                                              | PSMD3 PPI subnetwork                                                        | 0.69            |
| GO:0061041                                                    | regulation of wound healing                                                 | 0.69            |
| MP:0004355                                                    | short radius                                                                | 0.69            |
| MP:0005166                                                    | decreased susceptibility to injury                                          | 0.69            |
| GO:0046320                                                    | regulation of fatty acid oxidation                                          | 0.69            |
| MP:0008687                                                    | increased interleukin-2 secretion                                           | 0.69            |
| MP:0003632                                                    | abnormal nervous system morphology                                          | 0.69            |
| GO:0051480                                                    | cytosolic calcium ion homeostasis                                           | 0.69            |
| KEGG_MISMATCH_REPAIR                                          | KEGG_MISMATCH_REPAIR                                                        | 0.69            |
| ENSG000000185345                                              | PARK2 PPI subnetwork                                                        | 0.69            |
| GO:0045686                                                    | negative regulation of glial cell differentiator                            | 0.69            |
| REACTOME_TRANSPORT_OF_RIBONUCLEOPROTEINS_INTO_THE_HOST_NUCLEI | REACTOME_TRANSPORT_OF_RIBONUCLEOPROTEINS_INTO_THE_HOST_NUCLEUS              | 0.69            |
| ENSG000000117318                                              | ID3 PPI subnetwork                                                          | 0.69            |
| GO:0046651                                                    | lymphocyte proliferation                                                    | 0.69            |
| ENSG000000166206                                              | GABRB3 PPI subnetwork                                                       | 0.7             |

**Original gene set ID****Original gene set description****Nominal P value**

|                                       |                                                                                  |     |
|---------------------------------------|----------------------------------------------------------------------------------|-----|
| GO:0006919                            | activation of cysteine-type endopeptidase activity involved in apoptotic proces: | 0.7 |
| GO:0002052                            | positive regulation of neuroblast proliferator                                   | 0.7 |
| GO:0046635                            | positive regulation of alpha-beta T cell activation                              | 0.7 |
| GO:0030278                            | regulation of ossification                                                       | 0.7 |
| ENSG00000080503                       | SMARCA2 PPI subnetwork                                                           | 0.7 |
| ENSG00000175203                       | DCTN2 PPI subnetwork                                                             | 0.7 |
| ENSG00000118495                       | PLAGL1 PPI subnetwork                                                            | 0.7 |
| GO:0050830                            | defense response to Gram-positive bacterium                                      | 0.7 |
| GO:0032570                            | response to progesterone stimulus                                                | 0.7 |
| GO:0042451                            | purine nucleoside biosynthetic process                                           | 0.7 |
| GO:0042455                            | ribonucleoside biosynthetic process                                              | 0.7 |
| GO:0046129                            | purine ribonucleoside biosynthetic process                                       | 0.7 |
| ENSG00000173465                       | SSSCA1 PPI subnetwork                                                            | 0.7 |
| GO:0022836                            | gated channel activity                                                           | 0.7 |
| ENSG00000168005                       | C11orf84 PPI subnetwork                                                          | 0.7 |
| GO:0015459                            | potassium channel regulator activity                                             | 0.7 |
| ENSG00000039068                       | CDH1 PPI subnetwork                                                              | 0.7 |
| GO:0002495                            | antigen processing and presentation of peptide antigen via MHC class I           | 0.7 |
| REACTOME_DAG_AND_IP3_SIGNALING        | REACTOME_DAG_AND_IP3_SIGNALING                                                   | 0.7 |
| ENSG00000136026                       | CKAP4 PPI subnetwork                                                             | 0.7 |
| ENSG00000112640                       | PPP2R5D PPI subnetwork                                                           | 0.7 |
| ENSG00000145332                       | KLHL8 PPI subnetwork                                                             | 0.7 |
| GO:0051146                            | striated muscle cell differentiation                                             | 0.7 |
| ENSG00000142945                       | KIF2C PPI subnetwork                                                             | 0.7 |
| ENSG00000148180                       | GSN PPI subnetwork                                                               | 0.7 |
| ENSG00000107295                       | SH3GL2 PPI subnetwork                                                            | 0.7 |
| ENSG00000059378                       | PARP12 PPI subnetwork                                                            | 0.7 |
| GO:0048488                            | synaptic vesicle endocytosis                                                     | 0.7 |
| ENSG00000163440                       | PDCL2 PPI subnetwork                                                             | 0.7 |
| MP:0005542                            | corneal vascularization                                                          | 0.7 |
| ENSG00000173702                       | MUC13 PPI subnetwork                                                             | 0.7 |
| ENSG00000186879                       | ENSG00000186879 PPI subnetwork                                                   | 0.7 |
| GO:0050829                            | defense response to Gram-negative bacterium                                      | 0.7 |
| GO:2000736                            | regulation of stem cell differentiation                                          | 0.7 |
| GO:0030516                            | regulation of axon extension                                                     | 0.7 |
| GO:0051301                            | cell division                                                                    | 0.7 |
| GO:0006942                            | regulation of striated muscle contraction                                        | 0.7 |
| GO:0004112                            | cyclic-nucleotide phosphodiesterase activity                                     | 0.7 |
| MP:0005333                            | decreased heart rate                                                             | 0.7 |
| GO:0022029                            | telencephalon cell migration                                                     | 0.7 |
| MP:0001924                            | infertility                                                                      | 0.7 |
| MP:0011228                            | abnormal vitamin D level                                                         | 0.7 |
| ENSG00000147130                       | ZMYM3 PPI subnetwork                                                             | 0.7 |
| ENSG00000082258                       | CCNT2 PPI subnetwork                                                             | 0.7 |
| GO:0009416                            | response to light stimulus                                                       | 0.7 |
| REACTOME_AQUAPORIN:MEDIATED_TRANSPORT | REACTOME_AQUAPORIN:MEDIATED_TRANSPORT                                            | 0.7 |
| MP:0004113                            | abnormal aortic arch morphology                                                  | 0.7 |
| MP:0004398                            | cochlear inner hair cell degeneration                                            | 0.7 |
| MP:0004505                            | decreased renal glomerulus number                                                | 0.7 |

| Original gene set ID                                            | Original gene set description                                                       | Nominal P value |
|-----------------------------------------------------------------|-------------------------------------------------------------------------------------|-----------------|
| GO:0007187                                                      | G-protein coupled receptor signaling pathway, coupled to cyclic nucleotide second r | 0.7             |
| GO:0032039                                                      | integrator complex                                                                  | 0.7             |
| ENSG000000128340                                                | RAC2 PPI subnetwork                                                                 | 0.7             |
| GO:0003001                                                      | generation of a signal involved in cell-cell signaling                              | 0.7             |
| GO:0023061                                                      | signal release                                                                      | 0.7             |
| MP:0008502                                                      | increased IgG3 level                                                                | 0.7             |
| GO:0000421                                                      | autophagic vacuole membrane                                                         | 0.7             |
| GO:0014014                                                      | negative regulation of gliogenesis                                                  | 0.7             |
| MP:0002492                                                      | decreased IgE level                                                                 | 0.7             |
| ENSG000000132182                                                | NUP210 PPI subnetwork                                                               | 0.7             |
| MP:0002663                                                      | failure to form blastocele                                                          | 0.7             |
| GO:0031575                                                      | mitotic cell cycle G1/S transition checkpoint                                       | 0.7             |
| GO:0046488                                                      | phosphatidylinositol metabolic process                                              | 0.7             |
| ENSG000000196911                                                | KPNA5 PPI subnetwork                                                                | 0.7             |
| MP:0001426                                                      | polydipsia                                                                          | 0.7             |
| ENSG000000148229                                                | POLE3 PPI subnetwork                                                                | 0.7             |
| ENSG000000183684                                                | ALYREF PPI subnetwork                                                               | 0.7             |
| KEGG_BASE_EXCISION_REPAIR                                       | KEGG_BASE_EXCISION_REPAIR                                                           | 0.7             |
| GO:0051960                                                      | regulation of nervous system development                                            | 0.7             |
| REACTOME_ASSOCIATION_OF_LICENSING_FACTORS_WITH_THE_PRE:REPLICAT | REACTOME_ASSOCIATION_OF_LICENSING_FACTORS_WITH_THE_PRE:REPLICATIVE_                 | 0.7             |
| MP:0006030                                                      | abnormal otic vesicle development                                                   | 0.7             |
| ENSG000000166971                                                | AKTIP PPI subnetwork                                                                | 0.7             |
| REACTOME_SIGNALING_BY_PDGF                                      | REACTOME_SIGNALING_BY_PDGF                                                          | 0.7             |
| MP:0008181                                                      | increased marginal zone B cell number                                               | 0.7             |
| GO:0010874                                                      | regulation of cholesterol efflux                                                    | 0.7             |
| ENSG000000085063                                                | CD59 PPI subnetwork                                                                 | 0.7             |
| GO:0008076                                                      | voltage-gated potassium channel complex                                             | 0.7             |
| GO:0034705                                                      | potassium channel complex                                                           | 0.7             |
| GO:0035137                                                      | hindlimb morphogenesis                                                              | 0.7             |
| GO:0014048                                                      | regulation of glutamate secretion                                                   | 0.7             |
| ENSG000000163875                                                | MEAF6 PPI subnetwork                                                                | 0.7             |
| ENSG000000156299                                                | TIAM1 PPI subnetwork                                                                | 0.7             |
| ENSG000000188229                                                | TUBB4B PPI subnetwork                                                               | 0.7             |
| GO:0060415                                                      | muscle tissue morphogenesis                                                         | 0.7             |
| ENSG000000100368                                                | CSF2RB PPI subnetwork                                                               | 0.7             |
| ENSG000000134717                                                | BTF3L4 PPI subnetwork                                                               | 0.7             |
| KEGG_DILATED_CARDIOMYOPATHY                                     | KEGG_DILATED_CARDIOMYOPATHY                                                         | 0.7             |
| GO:0008234                                                      | cysteine-type peptidase activity                                                    | 0.7             |
| GO:0045216                                                      | cell-cell junction organization                                                     | 0.7             |
| MP:0008734                                                      | decreased susceptibility to endotoxin shock                                         | 0.7             |
| ENSG000000103343                                                | ZNF174 PPI subnetwork                                                               | 0.7             |
| ENSG000000120875                                                | DUSP4 PPI subnetwork                                                                | 0.7             |
| MP:0002941                                                      | increased circulating alanine transaminase leve                                     | 0.7             |
| GO:0009791                                                      | post-embryonic development                                                          | 0.7             |
| GO:0050804                                                      | regulation of synaptic transmission                                                 | 0.7             |
| GO:0030136                                                      | clathrin-coated vesicle                                                             | 0.7             |
| GO:0050994                                                      | regulation of lipid catabolic process                                               | 0.7             |
| ENSG000000013561                                                | RNF14 PPI subnetwork                                                                | 0.7             |
| GO:0030808                                                      | regulation of nucleotide biosynthetic process                                       | 0.7             |



| Original gene set ID                                             | Original gene set description                                    | Nominal P value |
|------------------------------------------------------------------|------------------------------------------------------------------|-----------------|
| GO:0030802                                                       | regulation of cyclic nucleotide biosynthetic process             | 0.7             |
| MP:0000480                                                       | increased rib number                                             | 0.7             |
| ENSG000000127588                                                 | GNG13 PPI subnetwork                                             | 0.7             |
| GO:0033116                                                       | endoplasmic reticulum-Golgi intermediate compartment membrane    | 0.7             |
| ENSG000000126226                                                 | PCID2 PPI subnetwork                                             | 0.7             |
| GO:0032642                                                       | regulation of chemokine production                               | 0.7             |
| REACTOME_SIGNALING_BY_EGFR                                       | REACTOME_SIGNALING_BY_EGFR                                       | 0.7             |
| GO:0032943                                                       | mononuclear cell proliferation                                   | 0.7             |
| GO:0030162                                                       | regulation of proteolysis                                        | 0.7             |
| GO:0008154                                                       | actin polymerization or depolymerization                         | 0.7             |
| REACTOME_DCC_MEDIATED_ATTRACTIVE_SIGNALING                       | REACTOME_DCC_MEDIATED_ATTRACTIVE_SIGNALING                       | 0.71            |
| REACTOME_RNA_POLYMERASE_I_TRANSCRIPTION                          | REACTOME_RNA_POLYMERASE_I_TRANSCRIPTION                          | 0.71            |
| MP:0000520                                                       | absent kidney                                                    | 0.71            |
| REACTOME_POTASSIUM_CHANNELS                                      | REACTOME_POTASSIUM_CHANNELS                                      | 0.71            |
| GO:0048486                                                       | parasympathetic nervous system development                       | 0.71            |
| GO:0005884                                                       | actin filament                                                   | 0.71            |
| ENSG000000173120                                                 | KDM2A PPI subnetwork                                             | 0.71            |
| REACTOME_G1S_TRANSITION                                          | REACTOME_G1S_TRANSITION                                          | 0.71            |
| GO:0006007                                                       | glucose catabolic process                                        | 0.71            |
| MP:0002608                                                       | increased hematocrit                                             | 0.71            |
| GO:0010720                                                       | positive regulation of cell development                          | 0.71            |
| GO:0030521                                                       | androgen receptor signaling pathway                              | 0.71            |
| GO:0072531                                                       | pyrimidine-containing compound transmembrane transport           | 0.71            |
| KEGG_B_CELL_RECEPTOR_SIGNALING_PATHWAY                           | KEGG_B_CELL_RECEPTOR_SIGNALING_PATHWAY                           | 0.71            |
| MP:0000823                                                       | abnormal lateral ventricle morphology                            | 0.71            |
| MP:0002910                                                       | abnormal excitatory postsynaptic currents                        | 0.71            |
| REACTOME_GAP:FILLING_DNA_REPAIR_SYNTHESIS_AND_LIGATION_IN_TC:NER | REACTOME_GAP:FILLING_DNA_REPAIR_SYNTHESIS_AND_LIGATION_IN_TC:NER | 0.71            |
| REACTOME_GAP:FILLING_DNA_REPAIR_SYNTHESIS_AND_LIGATION_IN_GG:NEF | REACTOME_GAP:FILLING_DNA_REPAIR_SYNTHESIS_AND_LIGATION_IN_GG:NER | 0.71            |
| ENSG000000104164                                                 | PLDN PPI subnetwork                                              | 0.71            |
| ENSG000000102312                                                 | PORCN PPI subnetwork                                             | 0.71            |
| MP:0005176                                                       | eyelids fail to open                                             | 0.71            |
| ENSG000000122585                                                 | NPY PPI subnetwork                                               | 0.71            |
| REACTOME_TAT:MEDIATED_HIV:1_ELONGATION_ARREST_AND_RECOVERY       | REACTOME_TAT:MEDIATED_HIV:1_ELONGATION_ARREST_AND_RECOVERY       | 0.71            |
| REACTOME_PAUSING_AND_RECOVERY_OF_TAT:MEDIATED_HIV:1_ELONGATIO    | REACTOME_PAUSING_AND_RECOVERY_OF_TAT:MEDIATED_HIV:1_ELONGATION   | 0.71            |
| GO:0000776                                                       | kinetochore                                                      | 0.71            |
| ENSG000000111664                                                 | GNB3 PPI subnetwork                                              | 0.71            |
| MP:0008034                                                       | enhanced lipolysis                                               | 0.71            |
| GO:0002237                                                       | response to molecule of bacterial origin                         | 0.71            |
| GO:0004536                                                       | deoxyribonuclease activity                                       | 0.71            |
| ENSG000000163017                                                 | ACTG2 PPI subnetwork                                             | 0.71            |
| GO:0060048                                                       | cardiac muscle contraction                                       | 0.71            |
| GO:0009410                                                       | response to xenobiotic stimulus                                  | 0.71            |
| GO:0071466                                                       | cellular response to xenobiotic stimulus                         | 0.71            |
| ENSG000000164105                                                 | SAP30 PPI subnetwork                                             | 0.71            |
| GO:0016042                                                       | lipid catabolic process                                          | 0.71            |
| GO:0032496                                                       | response to lipopolysaccharide                                   | 0.71            |
| GO:0012506                                                       | vesicle membrane                                                 | 0.71            |
| ENSG000000152413                                                 | HOMER1 PPI subnetwork                                            | 0.71            |
| REACTOME_G_ALPHA_Q_SIGNALLING_EVENTS                             | REACTOME_G_ALPHA_Q_SIGNALLING_EVENTS                             | 0.71            |



| Original gene set ID                              | Original gene set description                                                           | Nominal P value |
|---------------------------------------------------|-----------------------------------------------------------------------------------------|-----------------|
| GO:0048489                                        | synaptic vesicle transport                                                              | 0.71            |
| MP:0005617                                        | increased susceptibility to type IV hypersensitivity reactivator                        | 0.71            |
| MP:0005459                                        | decreased percent body fat                                                              | 0.71            |
| ENSG00000168439                                   | STIP1 PPI subnetwork                                                                    | 0.71            |
| GO:0002793                                        | positive regulation of peptide secretion                                                | 0.71            |
| GO:0006378                                        | mRNA polyadenylation                                                                    | 0.71            |
| MP:0000298                                        | absent atrioventricular cushions                                                        | 0.71            |
| GO:0010008                                        | endosome membrane                                                                       | 0.71            |
| MP:0004204                                        | absent stapes                                                                           | 0.71            |
| ENSG00000185008                                   | ROBO2 PPI subnetwork                                                                    | 0.71            |
| GO:0044427                                        | chromosomal part                                                                        | 0.71            |
| REACTOME_HIV:1_ELONGATION_ARREST_AND_RECOVERY     | REACTOME_HIV:1_ELONGATION_ARREST_AND_RECOVERY                                           | 0.71            |
| REACTOME_PAUSING_AND_RECOVERY_OF_HIV:1_ELONGATION | REACTOME_PAUSING_AND_RECOVERY_OF_HIV:1_ELONGATION                                       | 0.71            |
| REACTOME_PAUSING_AND_RECOVERY_OF_ELONGATION       | REACTOME_PAUSING_AND_RECOVERY_OF_ELONGATION                                             | 0.71            |
| REACTOME_ELONGATION_ARREST_AND_RECOVERY           | REACTOME_ELONGATION_ARREST_AND_RECOVERY                                                 | 0.71            |
| MP:0010551                                        | abnormal coronary vessel morphology                                                     | 0.71            |
| GO:0070330                                        | aromatase activity                                                                      | 0.71            |
| ENSG00000138709                                   | LARP1B PPI subnetwork                                                                   | 0.71            |
| ENSG00000033122                                   | LRRC7 PPI subnetwork                                                                    | 0.71            |
| MP:0008536                                        | enlarged third ventricle                                                                | 0.71            |
| GO:0002562                                        | somatic diversification of immune receptors via germline recombination within a species | 0.71            |
| GO:0016444                                        | somatic cell DNA recombination                                                          | 0.71            |
| MP:0011353                                        | expanded mesangial matrix                                                               | 0.71            |
| ENSG00000158769                                   | F11R PPI subnetwork                                                                     | 0.71            |
| GO:0046058                                        | cAMP metabolic process                                                                  | 0.71            |
| ENSG00000017797                                   | RALBP1 PPI subnetwork                                                                   | 0.71            |
| GO:0006354                                        | transcription elongation, DNA-dependent                                                 | 0.71            |
| REACTOME_GABA_B_RECEPTOR_ACTIVATION               | REACTOME_GABA_B_RECEPTOR_ACTIVATION                                                     | 0.71            |
| REACTOME_ACTIVATION_OF_GABAB_RECEPTORS            | REACTOME_ACTIVATION_OF_GABAB_RECEPTORS                                                  | 0.71            |
| GO:0035116                                        | embryonic hindlimb morphogenesis                                                        | 0.71            |
| GO:0000784                                        | nuclear chromosome, telomeric region                                                    | 0.71            |
| ENSG00000129562                                   | DAD1 PPI subnetwork                                                                     | 0.71            |
| MP:0000536                                        | hydroureter                                                                             | 0.71            |
| ENSG00000122756                                   | CNTFR PPI subnetwork                                                                    | 0.72            |
| ENSG00000124642                                   | ENSG00000124642 PPI subnetwork                                                          | 0.72            |
| ENSG00000184825                                   | HIST1H2AH PPI subnetwork                                                                | 0.72            |
| GO:0005487                                        | nucleocytoplasmic transporter activity                                                  | 0.72            |
| ENSG00000162231                                   | NXF1 PPI subnetwork                                                                     | 0.72            |
| GO:0051241                                        | negative regulation of multicellular organismal process                                 | 0.72            |
| ENSG00000133119                                   | RFC3 PPI subnetwork                                                                     | 0.72            |
| MP:0003728                                        | abnormal retinal photoreceptor layer morphology                                         | 0.72            |
| GO:0031683                                        | G-protein beta/gamma-subunit complex binding                                            | 0.72            |
| ENSG00000180573                                   | HIST1H2AC PPI subnetwork                                                                | 0.72            |
| GO:0051262                                        | protein tetramerization                                                                 | 0.72            |
| GO:0010927                                        | cellular component assembly involved in morphogenesis                                   | 0.72            |
| ENSG00000118515                                   | SGK1 PPI subnetwork                                                                     | 0.72            |
| ENSG00000101306                                   | MYLK2 PPI subnetwork                                                                    | 0.72            |
| ENSG00000174720                                   | LARP7 PPI subnetwork                                                                    | 0.72            |
| GO:0019935                                        | cyclic-nucleotide-mediated signaling                                                    | 0.72            |

| Original gene set ID                                                        | Original gene set description                                               | Nominal P value |
|-----------------------------------------------------------------------------|-----------------------------------------------------------------------------|-----------------|
| GO:0045777                                                                  | positive regulation of blood pressure                                       | 0.72            |
| REACTOME_PRESYNAPTIC_NICOTINIC_ACETYLCHOLINE_RECEPTORS                      | REACTOME_PRESYNAPTIC_NICOTINIC_ACETYLCHOLINE_RECEPTORS                      | 0.72            |
| ENSG000000137403                                                            | HLA-F PPI subnetwork                                                        | 0.72            |
| ENSG000000213066                                                            | FGFR1OP PPI subnetwork                                                      | 0.72            |
| ENSG000000157766                                                            | ACAN PPI subnetwork                                                         | 0.72            |
| GO:0032451                                                                  | demethylase activity                                                        | 0.72            |
| REACTOME_CROSS:PRESENTATION_OF_SOLUBLE_EXOGENOUS_ANTIGENS_ENDOSOMAL_PATHWAY | REACTOME_CROSS:PRESENTATION_OF_SOLUBLE_EXOGENOUS_ANTIGENS_ENDOSOMAL_PATHWAY | 0.72            |
| ENSG000000120837                                                            | NFYB PPI subnetwork                                                         | 0.72            |
| GO:0000226                                                                  | microtubule cytoskeleton organization                                       | 0.72            |
| GO:0051145                                                                  | smooth muscle cell differentiation                                          | 0.72            |
| ENSG000000111052                                                            | LIN7A PPI subnetwork                                                        | 0.72            |
| ENSG000000151247                                                            | EIF4E PPI subnetwork                                                        | 0.72            |
| ENSG000000130640                                                            | TUBGCP2 PPI subnetwork                                                      | 0.72            |
| GO:0010001                                                                  | glial cell differentiation                                                  | 0.72            |
| MP:0005587                                                                  | abnormal Meckel's cartilage morphology                                      | 0.72            |
| GO:0015074                                                                  | DNA integration                                                             | 0.72            |
| GO:0048715                                                                  | negative regulation of oligodendrocyte differentiation                      | 0.72            |
| ENSG000000164975                                                            | SNAPC3 PPI subnetwork                                                       | 0.72            |
| ENSG000000158290                                                            | CUL4B PPI subnetwork                                                        | 0.72            |
| ENSG000000125743                                                            | SNRPD2 PPI subnetwork                                                       | 0.72            |
| ENSG000000138685                                                            | FGF2 PPI subnetwork                                                         | 0.72            |
| GO:0006364                                                                  | rRNA processing                                                             | 0.72            |
| GO:0042092                                                                  | type 2 immune response                                                      | 0.72            |
| REACTOME_RNA_POLYMERASE_I_PROMOTER_OPENING                                  | REACTOME_RNA_POLYMERASE_I_PROMOTER_OPENING                                  | 0.72            |
| GO:0033180                                                                  | proton-transporting V-type ATPase, V1 domain                                | 0.72            |
| GO:0030509                                                                  | BMP signaling pathway                                                       | 0.72            |
| GO:0035115                                                                  | embryonic forelimb morphogenesis                                            | 0.72            |
| ENSG000000115594                                                            | IL1R1 PPI subnetwork                                                        | 0.72            |
| GO:0048747                                                                  | muscle fiber development                                                    | 0.72            |
| GO:0010744                                                                  | positive regulation of macrophage derived foam cell differentiation         | 0.72            |
| MP:0002196                                                                  | absent corpus callosum                                                      | 0.72            |
| REACTOME_SYNTHESIS_SECRETION_AND_INACTIVATION_OF_GLUCAGON:LIKE_PEP_TIDES    | REACTOME_SYNTHESIS_SECRETION_AND_INACTIVATION_OF_GLUCAGON:LIKE_PEP_TIDES    | 0.72            |
| REACTOME_INCRETIN_SYNTHESIS_SECRETION_AND_INACTIVATION                      | REACTOME_INCRETIN_SYNTHESIS_SECRETION_AND_INACTIVATION                      | 0.72            |
| GO:0006643                                                                  | membrane lipid metabolic process                                            | 0.72            |
| MP:0001921                                                                  | reduced fertility                                                           | 0.72            |
| GO:0010463                                                                  | mesenchymal cell proliferation                                              | 0.72            |
| MP:0001685                                                                  | abnormal endoderm development                                               | 0.72            |
| ENSG000000104388                                                            | RAB2A PPI subnetwork                                                        | 0.72            |
| MP:0001065                                                                  | abnormal trigeminal nerve morphology                                        | 0.72            |
| ENSG000000104320                                                            | NBN PPI subnetwork                                                          | 0.72            |
| MP:0005656                                                                  | decreased aggression                                                        | 0.72            |
| ENSG000000215902                                                            | ENSG000000215902 PPI subnetwork                                             | 0.72            |
| REACTOME_G:PROTEIN_MEDIATED_EVENTS                                          | REACTOME_G:PROTEIN_MEDIATED_EVENTS                                          | 0.72            |
| ENSG000000137672                                                            | TRPC6 PPI subnetwork                                                        | 0.72            |
| GO:0009190                                                                  | cyclic nucleotide biosynthetic process                                      | 0.72            |
| GO:0010833                                                                  | telomere maintenance via telomere lengthening                               | 0.72            |
| MP:0001701                                                                  | incomplete embryo turning                                                   | 0.72            |
| GO:0046365                                                                  | monosaccharide catabolic process                                            | 0.72            |
| ENSG000000149782                                                            | PLCB3 PPI subnetwork                                                        | 0.72            |

| Original gene set ID                                          | Original gene set description                                  | Nominal P value |
|---------------------------------------------------------------|----------------------------------------------------------------|-----------------|
| GO:0008080                                                    | N-acetyltransferase activity                                   | 0.72            |
| MP:0003354                                                    | astrocytosis                                                   | 0.72            |
| GO:0007041                                                    | lysosomal transport                                            | 0.72            |
| ENSG00000082898                                               | XPO1 PPI subnetwork                                            | 0.72            |
| GO:0030119                                                    | AP-type membrane coat adaptor complex                          | 0.72            |
| GO:0090277                                                    | positive regulation of peptide hormone secretior               | 0.72            |
| ENSG00000106399                                               | RPA3 PPI subnetwork                                            | 0.72            |
| ENSG00000164867                                               | NOS3 PPI subnetwork                                            | 0.72            |
| ENSG00000177700                                               | POLR2L PPI subnetwork                                          | 0.72            |
| ENSG00000079805                                               | DNM2 PPI subnetwork                                            | 0.72            |
| ENSG00000113196                                               | HAND1 PPI subnetwork                                           | 0.72            |
| ENSG00000104879                                               | CKM PPI subnetwork                                             | 0.72            |
| GO:0007492                                                    | endoderm development                                           | 0.72            |
| ENSG00000110148                                               | CCKBR PPI subnetwork                                           | 0.72            |
| ENSG00000033050                                               | ABCF2 PPI subnetwork                                           | 0.72            |
| GO:0072132                                                    | mesenchyme morphogenesis                                       | 0.72            |
| MP:0002020                                                    | increased tumor incidence                                      | 0.72            |
| REACTOME_PROCESSIVE_SYNTHESIS_ON_THE_C:STRAND_OF_THE_TELOMERE | REACTOME_PROCESSIVE_SYNTHESIS_ON_THE_C:STRAND_OF_THE_TELOMERE  | 0.72            |
| GO:0031406                                                    | carboxylic acid binding                                        | 0.72            |
| GO:0031901                                                    | early endosome membrane                                        | 0.72            |
| ENSG00000153767                                               | GTF2E1 PPI subnetwork                                          | 0.72            |
| ENSG00000118491                                               | C6orf94 PPI subnetwork                                         | 0.72            |
| ENSG00000181789                                               | COPG PPI subnetwork                                            | 0.72            |
| GO:0004549                                                    | tRNA-specific ribonuclease activity                            | 0.72            |
| ENSG00000024048                                               | UBR2 PPI subnetwork                                            | 0.72            |
| GO:0021532                                                    | neural tube patterning                                         | 0.72            |
| MP:0003070                                                    | increased vascular permeability                                | 0.72            |
| GO:0008589                                                    | regulation of smoothened signaling pathway                     | 0.72            |
| ENSG00000100836                                               | PABPN1 PPI subnetwork                                          | 0.72            |
| GO:0030199                                                    | collagen fibril organization                                   | 0.72            |
| REACTOME_RNA_POLYMERASE_I_PROMOTER_CLEARANCE                  | REACTOME_RNA_POLYMERASE_I_PROMOTER_CLEARANCE                   | 0.72            |
| GO:0032602                                                    | chemokine production                                           | 0.72            |
| MP:0005165                                                    | increased susceptibility to injury                             | 0.72            |
| ENSG00000104626                                               | ERI1 PPI subnetwork                                            | 0.72            |
| MP:0001566                                                    | hyperphosphatemia                                              | 0.73            |
| GO:0043679                                                    | axon terminus                                                  | 0.73            |
| GO:2000677                                                    | regulation of transcription regulatory region DNA binding      | 0.73            |
| GO:0032319                                                    | regulation of Rho GTPase activity                              | 0.73            |
| ENSG00000204086                                               | RPA4 PPI subnetwork                                            | 0.73            |
| ENSG00000113318                                               | MSH3 PPI subnetwork                                            | 0.73            |
| ENSG00000103994                                               | ZFP106 PPI subnetwork                                          | 0.73            |
| GO:0006805                                                    | xenobiotic metabolic process                                   | 0.73            |
| MP:0010769                                                    | abnormal survival                                              | 0.73            |
| ENSG00000215727                                               | ENSG00000215727 PPI subnetwork                                 | 0.73            |
| ENSG00000065518                                               | NDUFB4 PPI subnetwork                                          | 0.73            |
| MP:0004543                                                    | abnormal sperm physiology                                      | 0.73            |
| GO:0004693                                                    | cyclin-dependent protein kinase activity                       | 0.73            |
| ENSG00000186184                                               | POLR1D PPI subnetwork                                          | 0.73            |
| REACTOME_ACTIVATION_OF_NMDA_RECEPTOR_UPON_Glutamate_BINDING   | REACTOME_ACTIVATION_OF_NMDA_RECEPTOR_UPON_Glutamate_BINDING_AN | 0.73            |

| Original gene set ID                      | Original gene set description                                             | Nominal P value |
|-------------------------------------------|---------------------------------------------------------------------------|-----------------|
| GO:0048291                                | isotype switching to IgG isotypes                                         | 0.73            |
| ENSG00000088367                           | EPB41L1 PPI subnetwork                                                    | 0.73            |
| GO:0030917                                | midbrain-hindbrain boundary development                                   | 0.73            |
| GO:2001252                                | positive regulation of chromosome organization                            | 0.73            |
| REACTOME_TRANSCRIPTION                    | REACTOME_TRANSCRIPTION                                                    | 0.73            |
| GO:0006541                                | glutamine metabolic process                                               | 0.73            |
| GO:0051051                                | negative regulation of transport                                          | 0.73            |
| GO:0060429                                | epithelium development                                                    | 0.73            |
| MP:0002757                                | decreased vertical activity                                               | 0.73            |
| ENSG00000153774                           | CFDP1 PPI subnetwork                                                      | 0.73            |
| GO:0010464                                | regulation of mesenchymal cell proliferation                              | 0.73            |
| ENSG00000023318                           | ERP44 PPI subnetwork                                                      | 0.73            |
| GO:0060322                                | head development                                                          | 0.73            |
| GO:0031954                                | positive regulation of protein autophosphorylation                        | 0.73            |
| MP:0004965                                | inner cell mass degeneration                                              | 0.73            |
| GO:0044460                                | flagellum part                                                            | 0.73            |
| GO:0044442                                | microtubule-based flagellum part                                          | 0.73            |
| ENSG00000167986                           | DDB1 PPI subnetwork                                                       | 0.73            |
| GO:0007193                                | adenylate cyclase-inhibiting G-protein coupled receptor signaling pathway | 0.73            |
| GO:0048302                                | regulation of isotype switching to IgG isotypes                           | 0.73            |
| KEGG_SYSTEMIC_LUPUS_ERYTHEMATOSUS         | KEGG_SYSTEMIC_LUPUS_ERYTHEMATOSUS                                         | 0.73            |
| GO:0004930                                | G-protein coupled receptor activity                                       | 0.73            |
| ENSG00000168539                           | CHRM1 PPI subnetwork                                                      | 0.73            |
| ENSG00000125977                           | EIF2S2 PPI subnetwork                                                     | 0.73            |
| GO:0072511                                | divalent inorganic cation transport                                       | 0.73            |
| ENSG00000104637                           | ENSG00000104637 PPI subnetwork                                            | 0.73            |
| GO:0048663                                | neuron fate commitment                                                    | 0.73            |
| GO:0042165                                | neurotransmitter binding                                                  | 0.73            |
| ENSG00000154917                           | RAB6B PPI subnetwork                                                      | 0.73            |
| ENSG00000154016                           | GRAP PPI subnetwork                                                       | 0.73            |
| ENSG00000185518                           | SV2B PPI subnetwork                                                       | 0.73            |
| REACTOME_HOST_INTERACTIONS_OF_HIV_FACTORS | REACTOME_HOST_INTERACTIONS_OF_HIV_FACTORS                                 | 0.73            |
| ENSG00000214133                           | ENSG00000214133 PPI subnetwork                                            | 0.73            |
| ENSG00000158623                           | COPG2 PPI subnetwork                                                      | 0.73            |
| MP:0003656                                | abnormal erythrocyte physiology                                           | 0.73            |
| ENSG00000152234                           | ATP5A1 PPI subnetwork                                                     | 0.73            |
| GO:0048675                                | axon extension                                                            | 0.73            |
| ENSG00000163539                           | CLASP2 PPI subnetwork                                                     | 0.73            |
| ENSG00000111653                           | ING4 PPI subnetwork                                                       | 0.73            |
| ENSG00000084463                           | WBP11 PPI subnetwork                                                      | 0.73            |
| GO:0048551                                | metalloenzyme inhibitor activity                                          | 0.73            |
| GO:0008191                                | metalloendopeptidase inhibitor activity                                   | 0.73            |
| MP:0001008                                | abnormal sympathetic ganglion morphology                                  | 0.73            |
| MP:0003047                                | abnormal thoracic vertebrae morphology                                    | 0.73            |
| MP:0005153                                | abnormal B cell proliferation                                             | 0.73            |
| MP:0005225                                | abnormal vertebrae development                                            | 0.73            |
| ENSG00000147202                           | DIAPH2 PPI subnetwork                                                     | 0.73            |
| ENSG00000049541                           | RFC2 PPI subnetwork                                                       | 0.73            |
| ENSG00000101608                           | MYL12A PPI subnetwork                                                     | 0.73            |

| Original gene set ID                                         | Original gene set description                                | Nominal P value |
|--------------------------------------------------------------|--------------------------------------------------------------|-----------------|
| GO:0061136                                                   | regulation of proteasomal protein catabolic process          | 0.73            |
| MP:0003658                                                   | abnormal capillary morphology                                | 0.73            |
| ENSG00000177963                                              | RIC8A PPI subnetwork                                         | 0.73            |
| ENSG00000129991                                              | TNNI3 PPI subnetwork                                         | 0.73            |
| ENSG00000111581                                              | NUP107 PPI subnetwork                                        | 0.73            |
| MP:0009243                                                   | hairpin sperm flagellum                                      | 0.73            |
| ENSG00000205542                                              | TMSB4X PPI subnetwork                                        | 0.73            |
| MP:0004811                                                   | abnormal neuron physiology                                   | 0.73            |
| GO:0030888                                                   | regulation of B cell proliferation                           | 0.73            |
| ENSG00000099817                                              | POLR2E PPI subnetwork                                        | 0.73            |
| MP:0008566                                                   | increased interferon-gamma secretion                         | 0.73            |
| REACTOME_EGFR_INTERACTS_WITH_PHOSPHOLIPASE_C:GAMMA           | REACTOME_EGFR_INTERACTS_WITH_PHOSPHOLIPASE_C:GAMMA           | 0.73            |
| GO:0006779                                                   | porphyrin-containing compound biosynthetic process           | 0.73            |
| GO:0033014                                                   | tetrapyrrole biosynthetic process                            | 0.73            |
| ENSG00000162188                                              | GNG3 PPI subnetwork                                          | 0.73            |
| REACTOME_ACTIVATION_OF_ATR_IN_RESPONSE_TO_REPLICATION_STRESS | REACTOME_ACTIVATION_OF_ATR_IN_RESPONSE_TO_REPLICATION_STRESS | 0.73            |
| MP:0005578                                                   | teratozoospermia                                             | 0.73            |
| MP:0003043                                                   | hypoalgesia                                                  | 0.73            |
| ENSG00000174437                                              | ATP2A2 PPI subnetwork                                        | 0.73            |
| GO:0016859                                                   | cis-trans isomerase activity                                 | 0.73            |
| GO:0051260                                                   | protein homooligomerization                                  | 0.73            |
| ENSG00000103035                                              | PSMD7 PPI subnetwork                                         | 0.73            |
| GO:2000826                                                   | regulation of heart morphogenesis                            | 0.73            |
| MP:0008044                                                   | increased NK cell number                                     | 0.73            |
| ENSG00000177380                                              | PPFIA3 PPI subnetwork                                        | 0.73            |
| MP:0001625                                                   | cardiac hypertrophy                                          | 0.73            |
| MP:0011110                                                   | partial preweaning lethality                                 | 0.73            |
| GO:0048515                                                   | spermatid differentiation                                    | 0.73            |
| MP:0002128                                                   | abnormal blood circulation                                   | 0.73            |
| GO:0000387                                                   | spliceosomal snRNP assembly                                  | 0.73            |
| MP:0001900                                                   | impaired synaptic plasticity                                 | 0.73            |
| GO:0032154                                                   | cleavage furrow                                              | 0.73            |
| ENSG00000055732                                              | MCOLN3 PPI subnetwork                                        | 0.73            |
| GO:0007603                                                   | phototransduction, visible light                             | 0.73            |
| MP:0002163                                                   | abnormal gland morphology                                    | 0.73            |
| ENSG00000160224                                              | AIRE PPI subnetwork                                          | 0.73            |
| GO:0044455                                                   | mitochondrial membrane part                                  | 0.73            |
| REACTOME_BOTULINUM_NEUROTOXICITY                             | REACTOME_BOTULINUM_NEUROTOXICITY                             | 0.73            |
| ENSG00000143256                                              | PFDN2 PPI subnetwork                                         | 0.73            |
| GO:0030131                                                   | clathrin adaptor complex                                     | 0.73            |
| GO:0007029                                                   | endoplasmic reticulum organization                           | 0.73            |
| ENSG00000067182                                              | TNFRSF1A PPI subnetwork                                      | 0.74            |
| GO:0051918                                                   | negative regulation of fibrinolysis                          | 0.74            |
| REACTOME_MRNA_DECAY_BY_5_TO_3_EXORIBONUCLEASE                | REACTOME_MRNA_DECAY_BY_5_TO_3_EXORIBONUCLEASE                | 0.74            |
| MP:0009548                                                   | abnormal platelet aggregation                                | 0.74            |
| GO:0007034                                                   | vacuolar transport                                           | 0.74            |
| GO:0001505                                                   | regulation of neurotransmitter levels                        | 0.74            |
| MP:0005012                                                   | decreased eosinophil cell number                             | 0.74            |
| MP:0011049                                                   | impaired adaptive thermogenesis                              | 0.74            |

| <b>Original gene set ID</b>                | <b>Original gene set description</b>                                      | <b>Nominal P value</b> |
|--------------------------------------------|---------------------------------------------------------------------------|------------------------|
| GO:0055117                                 | regulation of cardiac muscle contraction                                  | 0.74                   |
| GO:0010543                                 | regulation of platelet activation                                         | 0.74                   |
| MP:0000519                                 | hydronephrosis                                                            | 0.74                   |
| ENSG000000096996                           | IL12RB1 PPI subnetwork                                                    | 0.74                   |
| ENSG000000196792                           | STRN3 PPI subnetwork                                                      | 0.74                   |
| GO:0031343                                 | positive regulation of cell killing                                       | 0.74                   |
| GO:0003755                                 | peptidyl-prolyl cis-trans isomerase activity                              | 0.74                   |
| GO:0009187                                 | cyclic nucleotide metabolic process                                       | 0.74                   |
| MP:0003312                                 | abnormal locomotor coordination                                           | 0.74                   |
| ENSG000000136937                           | NCBP1 PPI subnetwork                                                      | 0.74                   |
| MP:0003014                                 | abnormal kidney medulla morphology                                        | 0.74                   |
| GO:0000184                                 | nuclear-transcribed mRNA catabolic process, nonsense-mediated decay       | 0.74                   |
| KEGG_HEMATOPOIETIC_CELL_LINEAGE            | KEGG_HEMATOPOIETIC_CELL_LINEAGE                                           | 0.74                   |
| ENSG000000105248                           | CCDC94 PPI subnetwork                                                     | 0.74                   |
| GO:0031571                                 | mitotic cell cycle G1/S transition DNA damage checkpoint                  | 0.74                   |
| ENSG000000164162                           | ANAPC10 PPI subnetwork                                                    | 0.74                   |
| GO:0022843                                 | voltage-gated cation channel activity                                     | 0.74                   |
| ENSG000000104863                           | LIN7B PPI subnetwork                                                      | 0.74                   |
| ENSG000000115306                           | SPTBN1 PPI subnetwork                                                     | 0.74                   |
| GO:0007338                                 | single fertilization                                                      | 0.74                   |
| ENSG000000101144                           | BMP7 PPI subnetwork                                                       | 0.74                   |
| KEGG_ETHER_LIPID_METABOLISM                | KEGG_ETHER_LIPID_METABOLISM                                               | 0.74                   |
| ENSG000000196367                           | TRRAP PPI subnetwork                                                      | 0.74                   |
| ENSG000000075151                           | EIF4G3 PPI subnetwork                                                     | 0.74                   |
| MP:0003056                                 | abnormal hyoid bone morphology                                            | 0.74                   |
| ENSG000000114450                           | GNB4 PPI subnetwork                                                       | 0.74                   |
| GO:0016614                                 | oxidoreductase activity, acting on CH-OH group of donors                  | 0.74                   |
| GO:0008301                                 | DNA binding, bending                                                      | 0.74                   |
| GO:0004520                                 | endodeoxyribonuclease activity                                            | 0.74                   |
| REACTOME_PLC:GAMMA1_SIGNALLING             | REACTOME_PLC:GAMMA1_SIGNALLING                                            | 0.74                   |
| ENSG000000101745                           | ANKRD12 PPI subnetwork                                                    | 0.74                   |
| GO:0042063                                 | gliogenesis                                                               | 0.74                   |
| ENSG000000136146                           | MED4 PPI subnetwork                                                       | 0.74                   |
| ENSG000000143384                           | MCL1 PPI subnetwork                                                       | 0.74                   |
| GO:0042645                                 | mitochondrial nucleoid                                                    | 0.74                   |
| MP:0002885                                 | abnormal AMPA-mediated synaptic currents                                  | 0.74                   |
| GO:0031570                                 | DNA integrity checkpoint                                                  | 0.74                   |
| ENSG000000102554                           | KLF5 PPI subnetwork                                                       | 0.74                   |
| REACTOME_RNA_POLYMERASE_I_CHAIN_ELONGATION | REACTOME_RNA_POLYMERASE_I_CHAIN_ELONGATION                                | 0.74                   |
| ENSG000000172850                           | LSM2 PPI subnetwork                                                       | 0.74                   |
| ENSG000000204392                           | LSM2 PPI subnetwork                                                       | 0.74                   |
| ENSG000000111987                           | ENSG000000111987 PPI subnetwork                                           | 0.74                   |
| ENSG000000106367                           | AP1S1 PPI subnetwork                                                      | 0.74                   |
| ENSG000000198223                           | CSF2RA PPI subnetwork                                                     | 0.74                   |
| GO:0007600                                 | sensory perception                                                        | 0.74                   |
| GO:0000288                                 | nuclear-transcribed mRNA catabolic process, deadenylation-dependent decay | 0.74                   |
| GO:0009206                                 | purine ribonucleoside triphosphate biosynthetic process                   | 0.74                   |
| GO:0005740                                 | mitochondrial envelope                                                    | 0.74                   |
| GO:0030282                                 | bone mineralization                                                       | 0.74                   |





| Original gene set ID                                            | Original gene set description                                       | Nominal P value |
|-----------------------------------------------------------------|---------------------------------------------------------------------|-----------------|
| MP:0001807                                                      | decreased IgA level                                                 | 0.74            |
| GO:0009145                                                      | purine nucleoside triphosphate biosynthetic process                 | 0.74            |
| ENSG000000134480                                                | CCNH PPI subnetwork                                                 | 0.74            |
| REACTOME_DNA_REPLICATION                                        | REACTOME_DNA_REPLICATION                                            | 0.74            |
| ENSG000000151067                                                | CACNA1C PPI subnetwork                                              | 0.74            |
| ENSG000000169429                                                | IL8 PPI subnetwork                                                  | 0.74            |
| GO:0007286                                                      | spermatid development                                               | 0.74            |
| MP:0001402                                                      | hypoactivity                                                        | 0.74            |
| GO:0050808                                                      | synapse organization                                                | 0.74            |
| ENSG000000166930                                                | MS4A5 PPI subnetwork                                                | 0.74            |
| ENSG000000077312                                                | SNRPA PPI subnetwork                                                | 0.75            |
| GO:0019002                                                      | GMP binding                                                         | 0.75            |
| ENSG000000065526                                                | SPEN PPI subnetwork                                                 | 0.75            |
| ENSG000000184672                                                | RALYL PPI subnetwork                                                | 0.75            |
| ENSG000000136560                                                | TANK PPI subnetwork                                                 | 0.75            |
| MP:0004947                                                      | skin inflammation                                                   | 0.75            |
| GO:0004690                                                      | cyclic nucleotide-dependent protein kinase activity                 | 0.75            |
| ENSG000000198569                                                | SLC34A3 PPI subnetwork                                              | 0.75            |
| ENSG000000123268                                                | ATF1 PPI subnetwork                                                 | 0.75            |
| GO:0006184                                                      | GTP catabolic process                                               | 0.75            |
| GO:0051385                                                      | response to mineralocorticoid stimulus                              | 0.75            |
| ENSG000000106628                                                | POLD2 PPI subnetwork                                                | 0.75            |
| GO:0055065                                                      | metal ion homeostasis                                               | 0.75            |
| MP:0000538                                                      | abnormal urinary bladder morphology                                 | 0.75            |
| REACTOME_BIOSYNTHESIS_OF_THE_N:GLYCAN_PRECURSOR_DOLICHOL_LIPID: | REACTOME_BIOSYNTHESIS_OF_THE_N:GLYCAN_PRECURSOR_DOLICHOL_LIPID:LINK | 0.75            |
| GO:0050714                                                      | positive regulation of protein secretion                            | 0.75            |
| ENSG000000215320                                                | ENSG000000215320 PPI subnetwork                                     | 0.75            |
| ENSG000000143977                                                | SNRPG PPI subnetwork                                                | 0.75            |
| MP:0004986                                                      | abnormal osteoblast morphology                                      | 0.75            |
| ENSG000000163453                                                | IGFBP7 PPI subnetwork                                               | 0.75            |
| MP:0011290                                                      | decreased nephron number                                            | 0.75            |
| ENSG000000141552                                                | ANAPC11 PPI subnetwork                                              | 0.75            |
| GO:0006672                                                      | ceramide metabolic process                                          | 0.75            |
| GO:0004386                                                      | helicase activity                                                   | 0.75            |
| ENSG00000014641                                                 | MDH1 PPI subnetwork                                                 | 0.75            |
| MP:0000150                                                      | abnormal rib morphology                                             | 0.75            |
| ENSG000000102001                                                | CACNA1F PPI subnetwork                                              | 0.75            |
| ENSG000000162290                                                | ENSG000000162290 PPI subnetwork                                     | 0.75            |
| GO:0043547                                                      | positive regulation of GTPase activity                              | 0.75            |
| MP:0002972                                                      | abnormal cardiac muscle contractility                               | 0.75            |
| GO:0006040                                                      | amino sugar metabolic process                                       | 0.75            |
| ENSG000000116062                                                | MSH6 PPI subnetwork                                                 | 0.75            |
| ENSG000000126821                                                | SGPP1 PPI subnetwork                                                | 0.75            |
| MP:0000230                                                      | abnormal systemic arterial blood pressure                           | 0.75            |
| ENSG000000048052                                                | HDAC9 PPI subnetwork                                                | 0.75            |
| GO:0051588                                                      | regulation of neurotransmitter transport                            | 0.75            |
| GO:0001676                                                      | long-chain fatty acid metabolic process                             | 0.75            |
| ENSG000000187514                                                | PTMA PPI subnetwork                                                 | 0.75            |
| ENSG000000030066                                                | NUP160 PPI subnetwork                                               | 0.75            |

| Original gene set ID | Original gene set description                                                        | Nominal P value |
|----------------------|--------------------------------------------------------------------------------------|-----------------|
| GO:0040013           | negative regulation of locomotion                                                    | 0.75            |
| ENSG00000099800      | TIMM13 PPI subnetwork                                                                | 0.75            |
| ENSG00000155897      | ADCY8 PPI subnetwork                                                                 | 0.75            |
| ENSG00000111716      | LDHB PPI subnetwork                                                                  | 0.75            |
| GO:0046883           | regulation of hormone secretion                                                      | 0.75            |
| ENSG00000106305      | AIMP2 PPI subnetwork                                                                 | 0.75            |
| ENSG00000108518      | PFN1 PPI subnetwork                                                                  | 0.75            |
| ENSG00000087586      | AURKA PPI subnetwork                                                                 | 0.75            |
| GO:0040036           | regulation of fibroblast growth factor receptor signaling pathway                    | 0.75            |
| MP:0000005           | increased brown adipose tissue amount                                                | 0.75            |
| GO:0030072           | peptide hormone secretion                                                            | 0.75            |
| ENSG00000178999      | AURKB PPI subnetwork                                                                 | 0.75            |
| GO:0042176           | regulation of protein catabolic process                                              | 0.75            |
| GO:0003230           | cardiac atrium development                                                           | 0.75            |
| MP:0003235           | abnormal alisphenoid bone morphology                                                 | 0.75            |
| ENSG00000172613      | RAD9A PPI subnetwork                                                                 | 0.75            |
| ENSG00000165629      | ATP5C1 PPI subnetwork                                                                | 0.75            |
| MP:0000455           | abnormal maxilla morphology                                                          | 0.75            |
| MP:0005297           | spina bifida occulta                                                                 | 0.75            |
| MP:0001410           | head bobbing                                                                         | 0.75            |
| ENSG00000160789      | LMNA PPI subnetwork                                                                  | 0.75            |
| ENSG00000126602      | TRAP1 PPI subnetwork                                                                 | 0.75            |
| GO:0019439           | aromatic compound catabolic process                                                  | 0.75            |
| GO:0002312           | B cell activation involved in immune response                                        | 0.75            |
| ENSG00000079819      | EPB41L2 PPI subnetwork                                                               | 0.75            |
| GO:0007050           | cell cycle arrest                                                                    | 0.75            |
| GO:0044349           | DNA excision                                                                         | 0.75            |
| GO:0000718           | nucleotide-excision repair, DNA damage removal                                       | 0.75            |
| ENSG00000141404      | GNAL PPI subnetwork                                                                  | 0.75            |
| GO:0030799           | regulation of cyclic nucleotide metabolic process                                    | 0.75            |
| GO:0010742           | macrophage derived foam cell differentiation                                         | 0.75            |
| GO:0090077           | foam cell differentiation                                                            | 0.75            |
| ENSG00000100142      | POLR2F PPI subnetwork                                                                | 0.75            |
| GO:0008237           | metallopeptidase activity                                                            | 0.75            |
| ENSG00000127337      | YEATS4 PPI subnetwork                                                                | 0.75            |
| GO:0032543           | mitochondrial translation                                                            | 0.75            |
| GO:0016624           | oxidoreductase activity, acting on the aldehyde or oxo group of donors, disulfide as | 0.75            |
| MP:0002878           | abnormal corticospinal tract morphology                                              | 0.75            |
| ENSG00000145649      | GZMA PPI subnetwork                                                                  | 0.75            |
| GO:0033293           | monocarboxylic acid binding                                                          | 0.75            |
| ENSG00000125970      | RALY PPI subnetwork                                                                  | 0.75            |
| ENSG00000168412      | MTNR1A PPI subnetwork                                                                | 0.75            |
| ENSG00000070061      | IKBKAP PPI subnetwork                                                                | 0.75            |
| MP:0005461           | abnormal dendritic cell morphology                                                   | 0.75            |
| GO:0046209           | nitric oxide metabolic process                                                       | 0.75            |
| MP:0002639           | micrognathia                                                                         | 0.75            |
| GO:0071496           | cellular response to external stimulus                                               | 0.75            |
| ENSG00000169031      | COL4A3 PPI subnetwork                                                                | 0.75            |
| GO:0006283           | transcription-coupled nucleotide-excision repair                                     | 0.75            |

**Original gene set ID****Original gene set description****Nominal P value**

|                                                              |                                                                     |      |
|--------------------------------------------------------------|---------------------------------------------------------------------|------|
| ENSG00000171403                                              | KRT9 PPI subnetwork                                                 | 0.75 |
| GO:0055002                                                   | striated muscle cell development                                    | 0.75 |
| GO:0001158                                                   | enhancer sequence-specific DNA binding                              | 0.75 |
| ENSG00000128266                                              | GNAZ PPI subnetwork                                                 | 0.75 |
| GO:0006725                                                   | cellular aromatic compound metabolic process                        | 0.75 |
| REACTOME_PLCG1_EVENTS_IN_ERBB2_SIGNALING                     | REACTOME_PLCG1_EVENTS_IN_ERBB2_SIGNALING                            | 0.75 |
| REACTOME_THROMBOXANE_SIGNALLING_THROUGH_TP_RECEPTOR          | REACTOME_THROMBOXANE_SIGNALLING_THROUGH_TP_RECEPTOR                 | 0.75 |
| ENSG00000101150                                              | TPD52L2 PPI subnetwork                                              | 0.75 |
| KEGG_HYPERTROPHIC_CARDIOMYOPATHY_HCM                         | KEGG_HYPERTROPHIC_CARDIOMYOPATHY_HCM                                | 0.75 |
| ENSG00000147669                                              | POLR2K PPI subnetwork                                               | 0.75 |
| MP:0008023                                                   | abnormal styloid process morphology                                 | 0.75 |
| GO:0014069                                                   | postsynaptic density                                                | 0.75 |
| GO:0044327                                                   | dendritic spine head                                                | 0.75 |
| GO:0006310                                                   | DNA recombination                                                   | 0.75 |
| REACTOME_P53:INDEPENDENT_G1S_DNA_DAMAGE_CHECKPOINT           | REACTOME_P53:INDEPENDENT_G1S_DNA_DAMAGE_CHECKPOINT                  | 0.75 |
| REACTOME_P53:INDEPENDENT_DNA_DAMAGE_RESPONSE                 | REACTOME_P53:INDEPENDENT_DNA_DAMAGE_RESPONSE                        | 0.75 |
| REACTOME_UBIQUITIN_MEDIATED_DEGRADATION_OF_PHOSPHORYLATED_CD | REACTOME_UBIQUITIN_MEDIATED_DEGRADATION_OF_PHOSPHORYLATED_CDC25     | 0.75 |
| ENSG00000149016                                              | TUT1 PPI subnetwork                                                 | 0.75 |
| ENSG00000126767                                              | ELK1 PPI subnetwork                                                 | 0.75 |
| ENSG00000108854                                              | SMURF2 PPI subnetwork                                               | 0.75 |
| ENSG00000126267                                              | COX6B1 PPI subnetwork                                               | 0.75 |
| ENSG00000092054                                              | MYH7 PPI subnetwork                                                 | 0.75 |
| MP:0004131                                                   | abnormal embryonic cilium morphology                                | 0.75 |
| GO:0030071                                                   | regulation of mitotic metaphase/anaphase transition                 | 0.75 |
| GO:0004437                                                   | inositol or phosphatidylinositol phosphatase activity               | 0.75 |
| MP:0003345                                                   | decreased rib number                                                | 0.75 |
| GO:0051340                                                   | regulation of ligase activity                                       | 0.75 |
| ENSG00000146535                                              | GNA12 PPI subnetwork                                                | 0.75 |
| ENSG00000105373                                              | GLTSCR2 PPI subnetwork                                              | 0.75 |
| REACTOME_EICOSANOID_LIGAND:BINDING_RECEPTORS                 | REACTOME_EICOSANOID_LIGAND:BINDING_RECEPTORS                        | 0.76 |
| ENSG00000170348                                              | TMED10 PPI subnetwork                                               | 0.76 |
| ENSG00000187953                                              | ENSG00000187953 PPI subnetwork                                      | 0.76 |
| ENSG00000122512                                              | PMS2 PPI subnetwork                                                 | 0.76 |
| ENSG00000169249                                              | ZRSR2 PPI subnetwork                                                | 0.76 |
| ENSG00000136824                                              | SMC2 PPI subnetwork                                                 | 0.76 |
| GO:0043567                                                   | regulation of insulin-like growth factor receptor signaling pathway | 0.76 |
| ENSG00000145736                                              | GTF2H2 PPI subnetwork                                               | 0.76 |
| GO:0032271                                                   | regulation of protein polymerization                                | 0.76 |
| ENSG00000116584                                              | ARHGEF2 PPI subnetwork                                              | 0.76 |
| ENSG00000168438                                              | CDC40 PPI subnetwork                                                | 0.76 |
| ENSG00000130024                                              | PHF10 PPI subnetwork                                                | 0.76 |
| GO:0060393                                                   | regulation of pathway-restricted SMAD protein phosphorylation       | 0.76 |
| GO:0016866                                                   | intramolecular transferase activity                                 | 0.76 |
| GO:0003002                                                   | regionalization                                                     | 0.76 |
| ENSG00000100028                                              | SNRPD3 PPI subnetwork                                               | 0.76 |
| ENSG00000169057                                              | MECP2 PPI subnetwork                                                | 0.76 |
| ENSG00000119335                                              | SET PPI subnetwork                                                  | 0.76 |
| MP:0001052                                                   | abnormal muscle innervation                                         | 0.76 |
| MP:0002206                                                   | abnormal CNS synaptic transmission                                  | 0.76 |

| <b>Original gene set ID</b>           | <b>Original gene set description</b>                                                  | <b>Nominal P value</b> |
|---------------------------------------|---------------------------------------------------------------------------------------|------------------------|
| MP:0004021                            | abnormal rod electrophysiology                                                        | 0.76                   |
| ENSG00000075711                       | DLG1 PPI subnetwork                                                                   | 0.76                   |
| ENSG00000197170                       | PSMD12 PPI subnetwork                                                                 | 0.76                   |
| GO:0030553                            | cGMP binding                                                                          | 0.76                   |
| ENSG00000119138                       | KLF9 PPI subnetwork                                                                   | 0.76                   |
| REACTOME_NETRIN:1_SIGNALING           | REACTOME_NETRIN:1_SIGNALING                                                           | 0.76                   |
| ENSG00000154429                       | C1orf96 PPI subnetwork                                                                | 0.76                   |
| ENSG00000131149                       | KIAA0182 PPI subnetwork                                                               | 0.76                   |
| MP:0008898                            | abnormal acrosome morphology                                                          | 0.76                   |
| ENSG00000175895                       | PLEKHF2 PPI subnetwork                                                                | 0.76                   |
| MP:0002752                            | abnormal somatic nervous system morphology                                            | 0.76                   |
| ENSG00000151065                       | DGP1B PPI subnetwork                                                                  | 0.76                   |
| GO:0005791                            | rough endoplasmic reticulum                                                           | 0.76                   |
| ENSG00000112081                       | SRSF3 PPI subnetwork                                                                  | 0.76                   |
| GO:0045263                            | proton-transporting ATP synthase complex, coupling factor F(o)                        | 0.76                   |
| GO:0006939                            | smooth muscle contraction                                                             | 0.76                   |
| ENSG00000134574                       | DDB2 PPI subnetwork                                                                   | 0.76                   |
| ENSG00000125676                       | THOC2 PPI subnetwork                                                                  | 0.76                   |
| ENSG00000197780                       | TAF13 PPI subnetwork                                                                  | 0.76                   |
| GO:0010827                            | regulation of glucose transport                                                       | 0.76                   |
| GO:0004385                            | guanylate kinase activity                                                             | 0.76                   |
| MP:0010386                            | abnormal urinary bladder physiology                                                   | 0.76                   |
| GO:0000076                            | DNA replication checkpoint                                                            | 0.76                   |
| GO:0060441                            | epithelial tube branching involved in lung morphogenesis                              | 0.76                   |
| ENSG00000113555                       | PCDH12 PPI subnetwork                                                                 | 0.76                   |
| ENSG00000111087                       | GLI1 PPI subnetwork                                                                   | 0.76                   |
| GO:0030814                            | regulation of cAMP metabolic process                                                  | 0.76                   |
| ENSG00000137054                       | POLR1E PPI subnetwork                                                                 | 0.76                   |
| ENSG00000159461                       | AMFR PPI subnetwork                                                                   | 0.76                   |
| GO:0030817                            | regulation of cAMP biosynthetic process                                               | 0.76                   |
| ENSG00000177951                       | BET1L PPI subnetwork                                                                  | 0.76                   |
| ENSG00000198846                       | TOX PPI subnetwork                                                                    | 0.76                   |
| ENSG00000124097                       | ENSG00000124097 PPI subnetwork                                                        | 0.76                   |
| ENSG00000103460                       | TOX3 PPI subnetwork                                                                   | 0.76                   |
| MP:0002882                            | abnormal neuron morphology                                                            | 0.76                   |
| ENSG00000007168                       | PAFAH1B1 PPI subnetwork                                                               | 0.76                   |
| GO:0050686                            | negative regulation of mRNA processing                                                | 0.76                   |
| GO:0006875                            | cellular metal ion homeostasis                                                        | 0.76                   |
| ENSG00000168477                       | TNXB PPI subnetwork                                                                   | 0.76                   |
| GO:0042787                            | protein ubiquitination involved in ubiquitin-dependent protein catabolic process      | 0.76                   |
| MP:0001688                            | abnormal somite development                                                           | 0.76                   |
| GO:0072528                            | pyrimidine-containing compound biosynthetic process                                   | 0.76                   |
| MP:0003233                            | prolonged QT interval                                                                 | 0.76                   |
| REACTOME_SULFUR_AMINO_ACID_METABOLISM | REACTOME_SULFUR_AMINO_ACID_METABOLISM                                                 | 0.76                   |
| GO:0002377                            | immunoglobulin production                                                             | 0.76                   |
| GO:0006665                            | sphingolipid metabolic process                                                        | 0.76                   |
| ENSG00000115241                       | PPM1G PPI subnetwork                                                                  | 0.76                   |
| ENSG000000064961                      | HMG20B PPI subnetwork                                                                 | 0.76                   |
| GO:0016616                            | oxidoreductase activity, acting on the CH-OH group of donors, NAD or NADP as acceptor | 0.76                   |

| Original gene set ID                     | Original gene set description                                   | Nominal P value |
|------------------------------------------|-----------------------------------------------------------------|-----------------|
| ENSG00000041357                          | PSMA4 PPI subnetwork                                            | 0.76            |
| ENSG00000198910                          | L1CAM PPI subnetwork                                            | 0.76            |
| GO:0015833                               | peptide transport                                               | 0.76            |
| ENSG00000103671                          | TRIP4 PPI subnetwork                                            | 0.76            |
| KEGG_NOD_LIKE_RECEPTOR_SIGNALING_PATHWAY | KEGG_NOD_LIKE_RECEPTOR_SIGNALING_PATHWAY                        | 0.76            |
| GO:0051384                               | response to glucocorticoid stimulus                             | 0.76            |
| ENSG00000153044                          | CENPH PPI subnetwork                                            | 0.76            |
| ENSG00000160916                          | ENSG00000160916 PPI subnetwork                                  | 0.76            |
| GO:0005743                               | mitochondrial inner membrane                                    | 0.76            |
| GO:0005770                               | late endosome                                                   | 0.76            |
| GO:0051428                               | peptide hormone receptor binding                                | 0.76            |
| GO:0002790                               | peptide secretion                                               | 0.76            |
| GO:0043161                               | proteasomal ubiquitin-dependent protein catabolic process       | 0.76            |
| ENSG00000072682                          | P4HA2 PPI subnetwork                                            | 0.76            |
| GO:0030279                               | negative regulation of ossification                             | 0.76            |
| GO:0002792                               | negative regulation of peptide secretion                        | 0.76            |
| ENSG00000110436                          | SLC1A2 PPI subnetwork                                           | 0.76            |
| MP:0005517                               | decreased liver regeneration                                    | 0.76            |
| ENSG00000121931                          | LRIF1 PPI subnetwork                                            | 0.76            |
| ENSG00000198576                          | ARC PPI subnetwork                                              | 0.76            |
| ENSG00000174231                          | PRPF8 PPI subnetwork                                            | 0.76            |
| MP:0010404                               | ostium primum atrial septal defect                              | 0.76            |
| GO:0007204                               | elevation of cytosolic calcium ion concentration                | 0.76            |
| ENSG00000128708                          | HAT1 PPI subnetwork                                             | 0.76            |
| MP:0002135                               | abnormal kidney morphology                                      | 0.76            |
| GO:0010576                               | metalloenzyme regulator activity                                | 0.76            |
| GO:0001510                               | RNA methylation                                                 | 0.76            |
| ENSG00000076053                          | RBM7 PPI subnetwork                                             | 0.76            |
| GO:0031329                               | regulation of cellular catabolic process                        | 0.76            |
| ENSG00000106541                          | AGR2 PPI subnetwork                                             | 0.76            |
| ENSG00000136875                          | PRPF4 PPI subnetwork                                            | 0.76            |
| GO:0021782                               | glial cell development                                          | 0.76            |
| GO:0051047                               | positive regulation of secretion                                | 0.76            |
| GO:0008144                               | drug binding                                                    | 0.76            |
| GO:0008227                               | G-protein coupled amine receptor activity                       | 0.76            |
| GO:0043392                               | negative regulation of DNA binding                              | 0.76            |
| GO:0021602                               | cranial nerve morphogenesis                                     | 0.76            |
| GO:0090090                               | negative regulation of canonical Wnt receptor signaling pathway | 0.77            |
| GO:0006298                               | mismatch repair                                                 | 0.77            |
| ENSG00000133083                          | DCLK1 PPI subnetwork                                            | 0.77            |
| GO:0010332                               | response to gamma radiation                                     | 0.77            |
| GO:0009142                               | nucleoside triphosphate biosynthetic process                    | 0.77            |
| ENSG00000135486                          | HNRNPA1 PPI subnetwork                                          | 0.77            |
| GO:0007369                               | gastrulation                                                    | 0.77            |
| REACTOME_M_PHASE                         | REACTOME_M_PHASE                                                | 0.77            |
| ENSG00000174021                          | GNG5 PPI subnetwork                                             | 0.77            |
| ENSG00000063244                          | U2AF2 PPI subnetwork                                            | 0.77            |
| ENSG00000103194                          | USP10 PPI subnetwork                                            | 0.77            |
| GO:0032412                               | regulation of ion transmembrane transporter activity            | 0.77            |

| <b>Original gene set ID</b>             | <b>Original gene set description</b>                                  | <b>Nominal P value</b> |
|-----------------------------------------|-----------------------------------------------------------------------|------------------------|
| ENSG00000149554                         | CHEK1 PPI subnetwork                                                  | 0.77                   |
| REACTOME_GPCR_LIGAND_BINDING            | REACTOME_GPCR_LIGAND_BINDING                                          | 0.77                   |
| MP:0002812                              | spherocytosis                                                         | 0.77                   |
| GO:0045191                              | regulation of isotype switching                                       | 0.77                   |
| MP:0003148                              | decreased cochlear coiling                                            | 0.77                   |
| MP:0010903                              | abnormal pulmonary alveolus wall morphology                           | 0.77                   |
| ENSG00000115694                         | STK25 PPI subnetwork                                                  | 0.77                   |
| ENSG00000164244                         | PRRC1 PPI subnetwork                                                  | 0.77                   |
| ENSG00000146731                         | CCT6A PPI subnetwork                                                  | 0.77                   |
| ENSG00000135336                         | ORC3 PPI subnetwork                                                   | 0.77                   |
| ENSG00000122122                         | SASH3 PPI subnetwork                                                  | 0.77                   |
| ENSG00000174718                         | C12orf35 PPI subnetwork                                               | 0.77                   |
| GO:0044309                              | neuron spine                                                          | 0.77                   |
| GO:0043197                              | dendritic spine                                                       | 0.77                   |
| MP:0008482                              | decreased spleen germinal center number                               | 0.77                   |
| ENSG00000114315                         | HES1 PPI subnetwork                                                   | 0.77                   |
| GO:0060216                              | definitive hemopoiesis                                                | 0.77                   |
| MP:0005202                              | lethargy                                                              | 0.77                   |
| GO:0046933                              | hydrogen ion transporting ATP synthase activity, rotational mechanism | 0.77                   |
| GO:0044456                              | synapse part                                                          | 0.77                   |
| ENSG00000140350                         | ANP32A PPI subnetwork                                                 | 0.77                   |
| GO:0050661                              | NADP binding                                                          | 0.77                   |
| GO:0005109                              | frizzled binding                                                      | 0.77                   |
| ENSG00000101843                         | PSMD10 PPI subnetwork                                                 | 0.77                   |
| GO:0021761                              | limbic system development                                             | 0.77                   |
| ENSG00000109332                         | UBE2D3 PPI subnetwork                                                 | 0.77                   |
| REACTOME_NEURONAL_SYSTEM                | REACTOME_NEURONAL_SYSTEM                                              | 0.77                   |
| ENSG00000183763                         | TRAIIP PPI subnetwork                                                 | 0.77                   |
| REACTOME_PI3K_EVENTS_IN_ERBB4_SIGNALING | REACTOME_PI3K_EVENTS_IN_ERBB4_SIGNALING                               | 0.77                   |
| GO:0006171                              | cAMP biosynthetic process                                             | 0.77                   |
| GO:0046879                              | hormone secretion                                                     | 0.77                   |
| GO:0016471                              | vacuolar proton-transporting V-type ATPase complex                    | 0.77                   |
| MP:0002919                              | enhanced paired-pulse facilitation                                    | 0.77                   |
| GO:0045335                              | phagocytic vesicle                                                    | 0.77                   |
| MP:0000521                              | abnormal kidney cortex morphology                                     | 0.77                   |
| ENSG00000147439                         | BIN3 PPI subnetwork                                                   | 0.77                   |
| MP:0001890                              | anencephaly                                                           | 0.77                   |
| GO:0009894                              | regulation of catabolic process                                       | 0.77                   |
| REACTOME_TELOMERE_MAINTENANCE           | REACTOME_TELOMERE_MAINTENANCE                                         | 0.77                   |
| ENSG00000143379                         | SETDB1 PPI subnetwork                                                 | 0.77                   |
| GO:0007368                              | determination of left/right symmetry                                  | 0.77                   |
| GO:0060992                              | response to fungicide                                                 | 0.77                   |
| ENSG00000163960                         | UBXN7 PPI subnetwork                                                  | 0.77                   |
| REACTOME_FANCONI_ANEMIA_PATHWAY         | REACTOME_FANCONI_ANEMIA_PATHWAY                                       | 0.77                   |
| MP:0000644                              | dextrocardia                                                          | 0.77                   |
| MP:0001044                              | abnormal enteric nervous system morphology                            | 0.77                   |
| GO:0032589                              | neuron projection membrane                                            | 0.77                   |
| ENSG00000180209                         | MYLPF PPI subnetwork                                                  | 0.77                   |
| ENSG00000087274                         | ADD1 PPI subnetwork                                                   | 0.77                   |

| Original gene set ID                                            | Original gene set description                                   | Nominal P value |
|-----------------------------------------------------------------|-----------------------------------------------------------------|-----------------|
| MP:0003702                                                      | abnormal chromosome morphology                                  | 0.77            |
| REACTOME_CLASS_A1_RHODOPSIN:LIKE_RECEPTORS                      | REACTOME_CLASS_A1_RHODOPSIN:LIKE_RECEPTORS                      | 0.77            |
| ENSG000000116459                                                | ATP5F1 PPI subnetwork                                           | 0.77            |
| GO:0001533                                                      | cornified envelope                                              | 0.77            |
| MP:0002998                                                      | abnormal bone remodeling                                        | 0.77            |
| MP:0002682                                                      | decreased mature ovarian follicle number                        | 0.77            |
| ENSG00000205937                                                 | RNPS1 PPI subnetwork                                            | 0.77            |
| ENSG000000101444                                                | AHCY PPI subnetwork                                             | 0.77            |
| GO:0030017                                                      | sarcomere                                                       | 0.77            |
| ENSG00000164109                                                 | MAD2L1 PPI subnetwork                                           | 0.77            |
| GO:0010389                                                      | regulation of G2/M transition of mitotic cell cycle             | 0.77            |
| ENSG00000108528                                                 | SLC25A11 PPI subnetwork                                         | 0.77            |
| ENSG00000196284                                                 | SUPT3H PPI subnetwork                                           | 0.77            |
| REACTOME_TANDEM_PORE_DOMAIN_POTASSIUM_CHANNELS                  | REACTOME_TANDEM_PORE_DOMAIN_POTASSIUM_CHANNELS                  | 0.77            |
| GO:0017091                                                      | AU-rich element binding                                         | 0.77            |
| ENSG00000127928                                                 | GNGT1 PPI subnetwork                                            | 0.77            |
| ENSG00000011007                                                 | TCEB3 PPI subnetwork                                            | 0.77            |
| ENSG00000128609                                                 | NDUFA5 PPI subnetwork                                           | 0.77            |
| ENSG00000182180                                                 | MRPS16 PPI subnetwork                                           | 0.77            |
| GO:0006699                                                      | bile acid biosynthetic process                                  | 0.77            |
| GO:0009954                                                      | proximal/distal pattern formation                               | 0.77            |
| REACTOME_PI3K_EVENTS_IN_ERBB2_SIGNALING                         | REACTOME_PI3K_EVENTS_IN_ERBB2_SIGNALING                         | 0.77            |
| ENSG00000136273                                                 | HUS1 PPI subnetwork                                             | 0.77            |
| ENSG00000042832                                                 | TG PPI subnetwork                                               | 0.77            |
| REACTOME_POLYMERASE_SWITCHING_ON_THE_C:STRAND_OF_THE_TELOMER    | REACTOME_POLYMERASE_SWITCHING_ON_THE_C:STRAND_OF_THE_TELOMERE   | 0.77            |
| REACTOME_LEADING_STRAND_SYNTHESIS                               | REACTOME_LEADING_STRAND_SYNTHESIS                               | 0.77            |
| REACTOME_POLYMERASE_SWITCHING                                   | REACTOME_POLYMERASE_SWITCHING                                   | 0.77            |
| MP:0010856                                                      | dilated respiratory conducting tubes                            | 0.77            |
| KEGG_EPITHELIAL_CELL_SIGNALING_IN_HELICOBACTER_PYLORI_INFECTION | KEGG_EPITHELIAL_CELL_SIGNALING_IN_HELICOBACTER_PYLORI_INFECTION | 0.77            |
| GO:0008278                                                      | cohesin complex                                                 | 0.77            |
| ENSG00000213611                                                 | ENSG00000213611 PPI subnetwork                                  | 0.77            |
| ENSG00000177889                                                 | UBE2N PPI subnetwork                                            | 0.77            |
| REACTOME_PLC_BETA_MEDIATED_EVENTS                               | REACTOME_PLC_BETA_MEDIATED_EVENTS                               | 0.77            |
| MP:0002016                                                      | ovary cysts                                                     | 0.77            |
| ENSG00000147869                                                 | CER1 PPI subnetwork                                             | 0.77            |
| ENSG00000108294                                                 | PSMB3 PPI subnetwork                                            | 0.77            |
| GO:0042742                                                      | defense response to bacterium                                   | 0.77            |
| GO:0008093                                                      | cytoskeletal adaptor activity                                   | 0.77            |
| REACTOME_DUAL_INCISION_REACTION_IN_GG:NER                       | REACTOME_DUAL_INCISION_REACTION_IN_GG:NER                       | 0.77            |
| REACTOME_FORMATION_OF_INCISION_COMPLEX_IN_GG:NER                | REACTOME_FORMATION_OF_INCISION_COMPLEX_IN_GG:NER                | 0.77            |
| MP:0000757                                                      | herniated abdominal wall                                        | 0.77            |
| ENSG000000164270                                                | HTR4 PPI subnetwork                                             | 0.77            |
| GO:0002293                                                      | alpha-beta T cell differentiation involved in immune response   | 0.77            |
| GO:0002287                                                      | alpha-beta T cell activation involved in immune response        | 0.77            |
| ENSG000000170558                                                | CDH2 PPI subnetwork                                             | 0.77            |
| ENSG00000117592                                                 | PRDX6 PPI subnetwork                                            | 0.77            |
| ENSG000000197818                                                | SLC9A8 PPI subnetwork                                           | 0.77            |
| MP:0001636                                                      | irregular heartbeat                                             | 0.78            |
| ENSG000000163082                                                | SGPP2 PPI subnetwork                                            | 0.78            |



| <b>Original gene set ID</b>                                  | <b>Original gene set description</b>                           | <b>Nominal P value</b> |
|--------------------------------------------------------------|----------------------------------------------------------------|------------------------|
| MP:0001071                                                   | abnormal facial nerve morphology                               | 0.78                   |
| ENSG00000002016                                              | RAD52 PPI subnetwork                                           | 0.78                   |
| ENSG000000120253                                             | NUP43 PPI subnetwork                                           | 0.78                   |
| GO:0051899                                                   | membrane depolarization                                        | 0.78                   |
| GO:0021766                                                   | hippocampus development                                        | 0.78                   |
| GO:0006836                                                   | neurotransmitter transport                                     | 0.78                   |
| GO:0042384                                                   | cilium assembly                                                | 0.78                   |
| ENSG000000179915                                             | NRXN1 PPI subnetwork                                           | 0.78                   |
| GO:0010743                                                   | regulation of macrophage derived foam cell differentiatior     | 0.78                   |
| MP:0005431                                                   | decreased oocyte number                                        | 0.78                   |
| ENSG000000115233                                             | PSMD14 PPI subnetwork                                          | 0.78                   |
| ENSG000000108272                                             | DHRS11 PPI subnetwork                                          | 0.78                   |
| MP:0003896                                                   | prolonged PR interval                                          | 0.78                   |
| ENSG000000104852                                             | SNRNP70 PPI subnetwork                                         | 0.78                   |
| ENSG00000067334                                              | DNTTIP2 PPI subnetwork                                         | 0.78                   |
| MP:0000534                                                   | abnormal ureter morphology                                     | 0.78                   |
| MP:0008146                                                   | asymmetric rib-sternum attachment                              | 0.78                   |
| MP:0000729                                                   | abnormal myogenesis                                            | 0.78                   |
| GO:0048167                                                   | regulation of synaptic plasticity                              | 0.78                   |
| ENSG000000183023                                             | SLC8A1 PPI subnetwork                                          | 0.78                   |
| ENSG000000153162                                             | BMP6 PPI subnetwork                                            | 0.78                   |
| GO:0046039                                                   | GTP metabolic process                                          | 0.78                   |
| GO:0005504                                                   | fatty acid binding                                             | 0.78                   |
| ENSG000000156970                                             | BUB1B PPI subnetwork                                           | 0.78                   |
| GO:0031966                                                   | mitochondrial membrane                                         | 0.78                   |
| ENSG000000111358                                             | GTF2H3 PPI subnetwork                                          | 0.78                   |
| GO:0003207                                                   | cardiac chamber formation                                      | 0.78                   |
| GO:0000077                                                   | DNA damage checkpoint                                          | 0.78                   |
| ENSG000000114026                                             | OGG1 PPI subnetwork                                            | 0.78                   |
| REACTOME_INHIBITION_OF_VOLTAGE_GATED_CA2_CHANNELS_VIA_GBETAG | REACTOME_INHIBITION_OF_VOLTAGE_GATED_CA2_CHANNELS_VIA_GBETAGAM | 0.78                   |
| REACTOME_ACTIVATION_OF_G_PROTEIN_GATED_POTASSIUM_CHANNELS    | REACTOME_ACTIVATION_OF_G_PROTEIN_GATED_POTASSIUM_CHANNELS      | 0.78                   |
| REACTOME_G_PROTEIN_GATED_POTASSIUM_CHANNELS                  | REACTOME_G_PROTEIN_GATED_POTASSIUM_CHANNELS                    | 0.78                   |
| ENSG000000186852                                             | ENSG000000186852 PPI subnetwork                                | 0.78                   |
| GO:0007409                                                   | axonogenesis                                                   | 0.78                   |
| GO:0019003                                                   | GDP binding                                                    | 0.78                   |
| REACTOME_SEROTONIN_RECEPTORS                                 | REACTOME_SEROTONIN_RECEPTORS                                   | 0.78                   |
| MP:0001093                                                   | small trigeminal ganglion                                      | 0.78                   |
| ENSG000000131876                                             | SNRPA1 PPI subnetwork                                          | 0.78                   |
| MP:0008267                                                   | abnormal hippocampus CA3 region morphology                     | 0.78                   |
| GO:0006595                                                   | polyamine metabolic process                                    | 0.78                   |
| GO:0007173                                                   | epidermal growth factor receptor signaling pathway             | 0.78                   |
| ENSG000000112559                                             | MDF1 PPI subnetwork                                            | 0.78                   |
| MP:0003657                                                   | abnormal erythrocyte osmotic lysis                             | 0.78                   |
| GO:0090278                                                   | negative regulation of peptide hormone secretior               | 0.78                   |
| ENSG00000067369                                              | TP53BP1 PPI subnetwork                                         | 0.78                   |
| MP:0002286                                                   | cryptorchism                                                   | 0.78                   |
| ENSG000000181218                                             | HIST3H2A PPI subnetwork                                        | 0.78                   |
| ENSG000000212868                                             | ENSG000000212868 PPI subnetwork                                | 0.78                   |
| ENSG000000198727                                             | MT-CYB PPI subnetwork                                          | 0.78                   |

| Original gene set ID                                               | Original gene set description                                      | Nominal P value |
|--------------------------------------------------------------------|--------------------------------------------------------------------|-----------------|
| ENSG00000166508                                                    | MCM7 PPI subnetwork                                                | 0.78            |
| ENSG00000100412                                                    | ACO2 PPI subnetwork                                                | 0.78            |
| GO:0045202                                                         | synapse                                                            | 0.78            |
| REACTOME_JNK_C:JUN_KINASES_PHOSPHORYLATION_AND_ACTIVATION_MEDIATED | REACTOME_JNK_C:JUN_KINASES_PHOSPHORYLATION_AND_ACTIVATION_MEDIATED | 0.78            |
| KEGG_NICOTINATE_AND_NICOTINAMIDE_METABOLISM                        | KEGG_NICOTINATE_AND_NICOTINAMIDE_METABOLISM                        | 0.78            |
| ENSG00000075651                                                    | PLD1 PPI subnetwork                                                | 0.78            |
| ENSG00000171848                                                    | RRM2 PPI subnetwork                                                | 0.78            |
| GO:0030501                                                         | positive regulation of bone mineralization                         | 0.78            |
| MP:0006301                                                         | abnormal mesenchyme morphology                                     | 0.78            |
| GO:0006684                                                         | sphingomyelin metabolic process                                    | 0.78            |
| ENSG00000135823                                                    | STX6 PPI subnetwork                                                | 0.78            |
| GO:0022898                                                         | regulation of transmembrane transporter activity                   | 0.78            |
| GO:0006397                                                         | mRNA processing                                                    | 0.78            |
| MP:0001096                                                         | abnormal glossopharyngeal ganglion morphology                      | 0.78            |
| ENSG00000168243                                                    | GNG4 PPI subnetwork                                                | 0.78            |
| REACTOME_G2M_CHECKPOINTS                                           | REACTOME_G2M_CHECKPOINTS                                           | 0.78            |
| MP:0005637                                                         | abnormal iron homeostasis                                          | 0.78            |
| ENSG00000141446                                                    | ESCO1 PPI subnetwork                                               | 0.78            |
| ENSG00000183454                                                    | GRIN2A PPI subnetwork                                              | 0.78            |
| GO:0019228                                                         | regulation of action potential in neuron                           | 0.78            |
| ENSG00000059769                                                    | DNAJC25 PPI subnetwork                                             | 0.78            |
| ENSG00000162419                                                    | GMEB1 PPI subnetwork                                               | 0.78            |
| GO:0009295                                                         | nucleoid                                                           | 0.78            |
| MP:0002229                                                         | neurodegeneration                                                  | 0.78            |
| ENSG00000132872                                                    | SYT4 PPI subnetwork                                                | 0.78            |
| MP:0001525                                                         | impaired balance                                                   | 0.78            |
| REACTOME_PROTEOLYTIC_CLEAVAGE_OF_SNARE_COMPLEX_PROTEINS            | REACTOME_PROTEOLYTIC_CLEAVAGE_OF_SNARE_COMPLEX_PROTEINS            | 0.78            |
| REACTOME_REGULATION_OF_INSULIN_SECRETION_BY_ACETYLCHOLINE          | REACTOME_REGULATION_OF_INSULIN_SECRETION_BY_ACETYLCHOLINE          | 0.78            |
| REACTOME_SIGNALING_BY_ERBB2                                        | REACTOME_SIGNALING_BY_ERBB2                                        | 0.78            |
| ENSG00000213639                                                    | PPP1CB PPI subnetwork                                              | 0.78            |
| ENSG00000117399                                                    | CDC20 PPI subnetwork                                               | 0.78            |
| ENSG00000047315                                                    | POLR2B PPI subnetwork                                              | 0.78            |
| KEGG_TYPE_I_DIABETES_MELLITUS                                      | KEGG_TYPE_I_DIABETES_MELLITUS                                      | 0.78            |
| ENSG00000005194                                                    | CIAPIN1 PPI subnetwork                                             | 0.78            |
| MP:0004158                                                         | right aortic arch                                                  | 0.78            |
| MP:0003635                                                         | abnormal synaptic transmission                                     | 0.78            |
| ENSG00000198788                                                    | MUC2 PPI subnetwork                                                | 0.78            |
| ENSG00000198932                                                    | GPRASP1 PPI subnetwork                                             | 0.78            |
| GO:0002292                                                         | T cell differentiation involved in immune response                 | 0.78            |
| ENSG00000125845                                                    | BMP2 PPI subnetwork                                                | 0.78            |
| ENSG00000136807                                                    | CDK9 PPI subnetwork                                                | 0.78            |
| MP:0006074                                                         | abnormal retinal rod bipolar cell morphology                       | 0.78            |
| REACTOME_ORGANIC_CATIONANIONZWITTERION_TRANSPORT                   | REACTOME_ORGANIC_CATIONANIONZWITTERION_TRANSPORT                   | 0.78            |
| GO:0005326                                                         | neurotransmitter transporter activity                              | 0.78            |
| GO:0010092                                                         | specification of organ identity                                    | 0.79            |
| ENSG00000152822                                                    | GRM1 PPI subnetwork                                                | 0.79            |
| ENSG00000071894                                                    | CPSF1 PPI subnetwork                                               | 0.79            |
| MP:0000269                                                         | abnormal heart looping                                             | 0.79            |
| REACTOME_BETA_DEFENSINS                                            | REACTOME_BETA_DEFENSINS                                            | 0.79            |

**Original gene set ID****Original gene set description****Nominal P value**

|                                                                |                                                                    |      |
|----------------------------------------------------------------|--------------------------------------------------------------------|------|
| GO:0070301                                                     | cellular response to hydrogen peroxide                             | 0.79 |
| ENSG00000213465                                                | ARL2 PPI subnetwork                                                | 0.79 |
| ENSG00000212874                                                | ENSG00000212874 PPI subnetwork                                     | 0.79 |
| ENSG00000198712                                                | MT-CO2 PPI subnetwork                                              | 0.79 |
| MP:0005329                                                     | abnormal myocardium layer morphology                               | 0.79 |
| ENSG00000196092                                                | PAX5 PPI subnetwork                                                | 0.79 |
| MP:0003232                                                     | abnormal forebrain development                                     | 0.79 |
| GO:0019321                                                     | pentose metabolic process                                          | 0.79 |
| MP:0001596                                                     | hypotension                                                        | 0.79 |
| ENSG00000182621                                                | PLCB1 PPI subnetwork                                               | 0.79 |
| GO:0030195                                                     | negative regulation of blood coagulation                           | 0.79 |
| ENSG00000173575                                                | CHD2 PPI subnetwork                                                | 0.79 |
| ENSG00000162704                                                | ARPC5 PPI subnetwork                                               | 0.79 |
| MP:0008788                                                     | abnormal fetal cardiomyocyte morphology                            | 0.79 |
| GO:0055080                                                     | cation homeostasis                                                 | 0.79 |
| ENSG00000164330                                                | EBF1 PPI subnetwork                                                | 0.79 |
| ENSG00000058272                                                | PPP1R12A PPI subnetwork                                            | 0.79 |
| ENSG00000142655                                                | PEX14 PPI subnetwork                                               | 0.79 |
| GO:0031576                                                     | G2/M transition checkpoint                                         | 0.79 |
| GO:0008173                                                     | RNA methyltransferase activity                                     | 0.79 |
| GO:0016849                                                     | phosphorus-oxygen lyase activity                                   | 0.79 |
| GO:0016831                                                     | carboxy-lyase activity                                             | 0.79 |
| ENSG00000100911                                                | PSME2 PPI subnetwork                                               | 0.79 |
| ENSG00000167863                                                | ATP5H PPI subnetwork                                               | 0.79 |
| MP:0001522                                                     | impaired swimming                                                  | 0.79 |
| GO:0001653                                                     | peptide receptor activity                                          | 0.79 |
| MP:0000955                                                     | abnormal spinal cord morphology                                    | 0.79 |
| GO:0031163                                                     | metallo-sulfur cluster assembly                                    | 0.79 |
| GO:0016226                                                     | iron-sulfur cluster assembly                                       | 0.79 |
| MP:0004252                                                     | abnormal direction of heart looping                                | 0.79 |
| ENSG00000181090                                                | EHMT1 PPI subnetwork                                               | 0.79 |
| REACTOME_ASSEMBLY_OF_THE_PRE:REPLICATIVE_COMPLEX               | REACTOME_ASSEMBLY_OF_THE_PRE:REPLICATIVE_COMPLEX                   | 0.79 |
| REACTOME_APCCDC20_MEDIATED_DEGRADATION_OF_MITOTIC_PROTEINS     | REACTOME_APCCDC20_MEDIATED_DEGRADATION_OF_MITOTIC_PROTEINS         | 0.79 |
| GO:0016769                                                     | transferase activity, transferring nitrogenous groups              | 0.79 |
| GO:0001935                                                     | endothelial cell proliferation                                     | 0.79 |
| MP:0002988                                                     | decreased urine osmolality                                         | 0.79 |
| ENSG00000100764                                                | PSMC1 PPI subnetwork                                               | 0.79 |
| ENSG00000165525                                                | NEMF PPI subnetwork                                                | 0.79 |
| MP:0005584                                                     | abnormal enzyme/coenzyme activity                                  | 0.79 |
| MP:0001958                                                     | emphysema                                                          | 0.79 |
| GO:0009060                                                     | aerobic respiration                                                | 0.79 |
| GO:0051707                                                     | response to other organism                                         | 0.79 |
| GO:0051969                                                     | regulation of transmission of nerve impulse                        | 0.79 |
| ENSG00000177189                                                | RPS6KA3 PPI subnetwork                                             | 0.79 |
| MP:0003222                                                     | increased cardiomyocyte apoptosis                                  | 0.79 |
| GO:0004518                                                     | nuclease activity                                                  | 0.79 |
| ENSG00000100567                                                | PSMA3 PPI subnetwork                                               | 0.79 |
| GO:0046164                                                     | alcohol catabolic process                                          | 0.79 |
| REACTOME_DEPOLARIZATION_OF_THE_PRESYNAPTIC_TERMINAL_TRIGGERS_T | REACTOME_DEPOLARIZATION_OF_THE_PRESYNAPTIC_TERMINAL_TRIGGERS_THE_I | 0.79 |

| Original gene set ID                                              | Original gene set description                                                                              | Nominal P value |
|-------------------------------------------------------------------|------------------------------------------------------------------------------------------------------------|-----------------|
| ENSG00000069329                                                   | VPS35 PPI subnetwork                                                                                       | 0.79            |
| MP:0000937                                                        | abnormal motor neuron morphology                                                                           | 0.79            |
| REACTOME_ACTIVATED_AMPK_STIMULATES_FATTY:ACID_OXIDATION_IN_MUSCLE | REACTOME_ACTIVATED_AMPK_STIMULATES_FATTY:ACID_OXIDATION_IN_MUSCLE                                          | 0.79            |
| ENSG00000124535                                                   | WRNIP1 PPI subnetwork                                                                                      | 0.79            |
| ENSG00000134371                                                   | CDC73 PPI subnetwork                                                                                       | 0.79            |
| ENSG00000085872                                                   | CHERP PPI subnetwork                                                                                       | 0.79            |
| GO:0046580                                                        | negative regulation of Ras protein signal transduction                                                     | 0.79            |
| MP:0001380                                                        | reduced male mating frequency                                                                              | 0.79            |
| ENSG00000124333                                                   | VAMP7 PPI subnetwork                                                                                       | 0.79            |
| MP:0003313                                                        | abnormal locomotor activation                                                                              | 0.79            |
| MP:0002183                                                        | gliosis                                                                                                    | 0.79            |
| ENSG00000168522                                                   | FNTA PPI subnetwork                                                                                        | 0.79            |
| GO:0045669                                                        | positive regulation of osteoblast differentiation                                                          | 0.79            |
| GO:0010498                                                        | proteasomal protein catabolic process                                                                      | 0.79            |
| KEGG_FATTY_ACID_METABOLISM                                        | KEGG_FATTY_ACID_METABOLISM                                                                                 | 0.79            |
| REACTOME_LYSOSOME_VESICLE_BIOGENESIS                              | REACTOME_LYSOSOME_VESICLE_BIOGENESIS                                                                       | 0.79            |
| GO:0009084                                                        | glutamine family amino acid biosynthetic process                                                           | 0.79            |
| ENSG00000117758                                                   | STX12 PPI subnetwork                                                                                       | 0.79            |
| GO:0021510                                                        | spinal cord development                                                                                    | 0.79            |
| ENSG00000178950                                                   | GAK PPI subnetwork                                                                                         | 0.79            |
| ENSG00000104835                                                   | FBXO17 PPI subnetwork                                                                                      | 0.79            |
| GO:0004745                                                        | retinol dehydrogenase activity                                                                             | 0.79            |
| GO:0051537                                                        | 2 iron, 2 sulfur cluster binding                                                                           | 0.79            |
| ENSG00000125450                                                   | NUP85 PPI subnetwork                                                                                       | 0.79            |
| GO:0009201                                                        | ribonucleoside triphosphate biosynthetic process                                                           | 0.79            |
| ENSG00000104884                                                   | ERCC2 PPI subnetwork                                                                                       | 0.79            |
| ENSG00000003756                                                   | RBM5 PPI subnetwork                                                                                        | 0.79            |
| ENSG00000127922                                                   | SHFM1 PPI subnetwork                                                                                       | 0.79            |
| ENSG00000134899                                                   | ERCC5 PPI subnetwork                                                                                       | 0.79            |
| MP:0000297                                                        | abnormal atrioventricular cushion morphology                                                               | 0.79            |
| GO:0016607                                                        | nuclear speck                                                                                              | 0.79            |
| MP:0008221                                                        | abnormal hippocampal commissure morphology                                                                 | 0.79            |
| ENSG00000173163                                                   | COMMD1 PPI subnetwork                                                                                      | 0.79            |
| ENSG00000139970                                                   | RTN1 PPI subnetwork                                                                                        | 0.79            |
| ENSG00000189283                                                   | FHIT PPI subnetwork                                                                                        | 0.79            |
| GO:0010578                                                        | regulation of adenylate cyclase activity involved in G-protein coupled receptor signaling pathway          | 0.79            |
| GO:0007189                                                        | adenylate cyclase-activating G-protein coupled receptor signaling pathway                                  | 0.79            |
| GO:0010579                                                        | positive regulation of adenylate cyclase activity involved in G-protein coupled receptor signaling pathway | 0.79            |
| GO:0007156                                                        | homophilic cell adhesion                                                                                   | 0.79            |
| ENSG00000101158                                                   | TH1L PPI subnetwork                                                                                        | 0.79            |
| GO:0030003                                                        | cellular cation homeostasis                                                                                | 0.79            |
| ENSG00000143870                                                   | PDIAG PPI subnetwork                                                                                       | 0.79            |
| REACTOME_SIGNALING_BY_BMP                                         | REACTOME_SIGNALING_BY_BMP                                                                                  | 0.79            |
| GO:0090087                                                        | regulation of peptide transport                                                                            | 0.79            |
| GO:0002791                                                        | regulation of peptide secretion                                                                            | 0.79            |
| ENSG00000035862                                                   | TIMP2 PPI subnetwork                                                                                       | 0.79            |
| GO:0007224                                                        | smoothed signaling pathway                                                                                 | 0.79            |
| GO:0042133                                                        | neurotransmitter metabolic process                                                                         | 0.79            |
| GO:0000460                                                        | maturation of 5.8S rRNA                                                                                    | 0.79            |

| Original gene set ID                                                    | Original gene set description                                                                 | Nominal P value |
|-------------------------------------------------------------------------|-----------------------------------------------------------------------------------------------|-----------------|
| ENSG00000183207                                                         | RUVBL2 PPI subnetwork                                                                         | 0.79            |
| MP:0005404                                                              | abnormal axon morphology                                                                      | 0.79            |
| ENSG00000068323                                                         | TFE3 PPI subnetwork                                                                           | 0.79            |
| GO:0051438                                                              | regulation of ubiquitin-protein ligase activity                                               | 0.79            |
| ENSG00000117533                                                         | VAMP4 PPI subnetwork                                                                          | 0.79            |
| GO:0005681                                                              | spliceosomal complex                                                                          | 0.79            |
| ENSG00000140829                                                         | DHX38 PPI subnetwork                                                                          | 0.79            |
| GO:0051052                                                              | regulation of DNA metabolic process                                                           | 0.8             |
| GO:0008277                                                              | regulation of G-protein coupled receptor protein signaling pathway                            | 0.8             |
| MP:0004966                                                              | abnormal inner cell mass proliferation                                                        | 0.8             |
| MP:0003008                                                              | enhanced long term potentiation                                                               | 0.8             |
| ENSG00000175054                                                         | ATR PPI subnetwork                                                                            | 0.8             |
| ENSG00000114107                                                         | CEP70 PPI subnetwork                                                                          | 0.8             |
| GO:0008430                                                              | selenium binding                                                                              | 0.8             |
| ENSG00000113522                                                         | RAD50 PPI subnetwork                                                                          | 0.8             |
| ENSG00000168061                                                         | SAC3D1 PPI subnetwork                                                                         | 0.8             |
| ENSG00000128534                                                         | NAA38 PPI subnetwork                                                                          | 0.8             |
| ENSG00000168067                                                         | MAP4K2 PPI subnetwork                                                                         | 0.8             |
| GO:0031649                                                              | heat generation                                                                               | 0.8             |
| ENSG00000075188                                                         | NUP37 PPI subnetwork                                                                          | 0.8             |
| GO:0005865                                                              | striated muscle thin filament                                                                 | 0.8             |
| ENSG00000111788                                                         | ENSG00000111788 PPI subnetwork                                                                | 0.8             |
| ENSG00000214826                                                         | ENSG00000214826 PPI subnetwork                                                                | 0.8             |
| ENSG00000137834                                                         | SMAD6 PPI subnetwork                                                                          | 0.8             |
| ENSG00000172175                                                         | MALT1 PPI subnetwork                                                                          | 0.8             |
| MP:0002675                                                              | asthenozoospermia                                                                             | 0.8             |
| REACTOME_MITOTIC_M:MG1_PHASES                                           | REACTOME_MITOTIC_M:MG1_PHASES                                                                 | 0.8             |
| REACTOME_ACTIVATION_OF_APCC_AND_APCCDC20_MEDIATED_DEGRADATION_OF_P53    | REACTOME_ACTIVATION_OF_APCC_AND_APCCDC20_MEDIATED_DEGRADATION_OF_P53                          | 0.8             |
| ENSG00000159720                                                         | ATP6V0D1 PPI subnetwork                                                                       | 0.8             |
| REACTOME_NEF:MEDIATES_DOWN_MODULATION_OF_CELL_SURFACE_RECEPTOR_FUNCTION | REACTOME_NEF:MEDIATES_DOWN_MODULATION_OF_CELL_SURFACE_RECEPTOR_FUNCTION                       | 0.8             |
| GO:0000956                                                              | nuclear-transcribed mRNA catabolic process                                                    | 0.8             |
| MP:0006316                                                              | increased urine sodium level                                                                  | 0.8             |
| ENSG00000140262                                                         | TCF12 PPI subnetwork                                                                          | 0.8             |
| GO:0004691                                                              | cAMP-dependent protein kinase activity                                                        | 0.8             |
| GO:0031396                                                              | regulation of protein ubiquitination                                                          | 0.8             |
| ENSG00000189091                                                         | SF3B3 PPI subnetwork                                                                          | 0.8             |
| REACTOME_GRB2_EVENTS_IN_ERBB2_SIGNALING                                 | REACTOME_GRB2_EVENTS_IN_ERBB2_SIGNALING                                                       | 0.8             |
| MP:0000029                                                              | abnormal malleus morphology                                                                   | 0.8             |
| GO:0044106                                                              | cellular amine metabolic process                                                              | 0.8             |
| ENSG00000151461                                                         | UPF2 PPI subnetwork                                                                           | 0.8             |
| GO:0032561                                                              | guanyl ribonucleotide binding                                                                 | 0.8             |
| GO:0019001                                                              | guanyl nucleotide binding                                                                     | 0.8             |
| GO:0006977                                                              | DNA damage response, signal transduction by p53 class mediator resulting in cell cycle arrest | 0.8             |
| GO:0072401                                                              | signal transduction involved in DNA integrity checkpoint                                      | 0.8             |
| GO:0072431                                                              | signal transduction involved in mitotic cell cycle G1/S transition DNA damage checkpoint      | 0.8             |
| GO:0072413                                                              | signal transduction involved in mitotic cell cycle checkpoint                                 | 0.8             |
| GO:0072422                                                              | signal transduction involved in DNA damage checkpoint                                         | 0.8             |
| GO:0072474                                                              | signal transduction involved in mitotic cell cycle G1/S checkpoint                            | 0.8             |
| ENSG00000183558                                                         | HIST2H2AA3 PPI subnetwork                                                                     | 0.8             |

| Original gene set ID                      | Original gene set description                                        | Nominal P value |
|-------------------------------------------|----------------------------------------------------------------------|-----------------|
| ENSG00000203812                           | HIST2H2AA4 PPI subnetwork                                            | 0.8             |
| ENSG00000128692                           | ENSG00000128692 PPI subnetwork                                       | 0.8             |
| GO:0007411                                | axon guidance                                                        | 0.8             |
| ENSG00000072415                           | MPP5 PPI subnetwork                                                  | 0.8             |
| MP:0000936                                | small telencephalic vesicles                                         | 0.8             |
| MP:0000611                                | jaundice                                                             | 0.8             |
| GO:0043254                                | regulation of protein complex assembly                               | 0.8             |
| ENSG00000213246                           | SUPT4H1 PPI subnetwork                                               | 0.8             |
| ENSG00000100056                           | DGCR14 PPI subnetwork                                                | 0.8             |
| GO:0031672                                | A band                                                               | 0.8             |
| MP:0000286                                | abnormal mitral valve morphology                                     | 0.8             |
| GO:0002700                                | regulation of production of molecular mediator of immune response    | 0.8             |
| GO:0007274                                | neuromuscular synaptic transmission                                  | 0.8             |
| KEGG_SPLICEOSOME                          | KEGG_SPLICEOSOME                                                     | 0.8             |
| GO:0016667                                | oxidoreductase activity, acting on a sulfur group of donors          | 0.8             |
| MP:0006380                                | abnormal spermatid morphology                                        | 0.8             |
| MP:0003141                                | cardiac fibrosis                                                     | 0.8             |
| GO:0048846                                | axon extension involved in axon guidance                             | 0.8             |
| ENSG00000136813                           | KIAA0368 PPI subnetwork                                              | 0.8             |
| MP:0002777                                | absent ovarian follicles                                             | 0.8             |
| GO:0030510                                | regulation of BMP signaling pathway                                  | 0.8             |
| GO:0008536                                | Ran GTPase binding                                                   | 0.8             |
| ENSG00000130779                           | CLIP1 PPI subnetwork                                                 | 0.8             |
| GO:0071377                                | cellular response to glucagon stimulus                               | 0.8             |
| ENSG00000135916                           | ITM2C PPI subnetwork                                                 | 0.8             |
| ENSG00000215476                           | ENSG00000215476 PPI subnetwork                                       | 0.8             |
| ENSG00000206476                           | ENSG00000206476 PPI subnetwork                                       | 0.8             |
| ENSG00000213780                           | GTF2H4 PPI subnetwork                                                | 0.8             |
| ENSG00000122218                           | COPA PPI subnetwork                                                  | 0.8             |
| MP:0001932                                | abnormal spermiogenesis                                              | 0.8             |
| MP:0009757                                | impaired behavioral response to morphine                             | 0.8             |
| ENSG00000157483                           | MYO1E PPI subnetwork                                                 | 0.8             |
| GO:0070169                                | positive regulation of biomineral tissue development                 | 0.8             |
| GO:0007623                                | circadian rhythm                                                     | 0.8             |
| GO:0032331                                | negative regulation of chondrocyte differentiation                   | 0.8             |
| MP:0000278                                | abnormal myocardial fiber morphology                                 | 0.8             |
| ENSG00000137992                           | DBT PPI subnetwork                                                   | 0.8             |
| GO:0044062                                | regulation of excretion                                              | 0.8             |
| GO:0050664                                | oxidoreductase activity, acting on NADH or NADPH, oxygen as acceptor | 0.8             |
| GO:0060324                                | face development                                                     | 0.8             |
| ENSG00000172315                           | TP53RK PPI subnetwork                                                | 0.8             |
| GO:0033178                                | proton-transporting two-sector ATPase complex, catalytic domain      | 0.8             |
| ENSG00000109107                           | ALDOC PPI subnetwork                                                 | 0.8             |
| GO:0006353                                | transcription termination, DNA-dependent                             | 0.8             |
| GO:0060479                                | lung cell differentiation                                            | 0.8             |
| MP:0010090                                | increased circulating creatine kinase leve                           | 0.8             |
| GO:0015036                                | disulfide oxidoreductase activity                                    | 0.8             |
| GO:0060795                                | cell fate commitment involved in formation of primary germ layer     | 0.8             |
| REACTOME_PEPTIDE_LIGAND:BINDING_RECEPTORS | REACTOME_PEPTIDE_LIGAND:BINDING_RECEPTORS                            | 0.8             |

| Original gene set ID                           | Original gene set description                         | Nominal P value |
|------------------------------------------------|-------------------------------------------------------|-----------------|
| GO:0046633                                     | alpha-beta T cell proliferation                       | 0.8             |
| GO:0008556                                     | potassium-transporting ATPase activity                | 0.8             |
| GO:0070663                                     | regulation of leukocyte proliferation                 | 0.8             |
| ENSG00000152208                                | GRID2 PPI subnetwork                                  | 0.8             |
| GO:0002053                                     | positive regulation of mesenchymal cell proliferation | 0.8             |
| ENSG00000065609                                | SNAP91 PPI subnetwork                                 | 0.8             |
| GO:0046676                                     | negative regulation of insulin secretion              | 0.8             |
| ENSG00000143228                                | NUF2 PPI subnetwork                                   | 0.8             |
| ENSG00000170606                                | HSPA4 PPI subnetwork                                  | 0.8             |
| ENSG00000108175                                | ZMIZ1 PPI subnetwork                                  | 0.8             |
| ENSG00000172201                                | ID4 PPI subnetwork                                    | 0.8             |
| GO:0051953                                     | negative regulation of amine transport                | 0.8             |
| GO:0042147                                     | retrograde transport, endosome to Golgi               | 0.81            |
| ENSG00000172572                                | PDE3A PPI subnetwork                                  | 0.81            |
| ENSG00000198478                                | SH3BGRL2 PPI subnetwork                               | 0.81            |
| GO:0050819                                     | negative regulation of coagulation                    | 0.81            |
| MP:0003862                                     | decreased aggression towards males                    | 0.81            |
| ENSG00000102981                                | PARD6A PPI subnetwork                                 | 0.81            |
| MP:0010264                                     | increased hepatoma incidence                          | 0.81            |
| GO:0003211                                     | cardiac ventricle formation                           | 0.81            |
| ENSG00000095002                                | MSH2 PPI subnetwork                                   | 0.81            |
| REACTOME_TRANSMISSION_ACROSS_CHEMICAL_SYNAPSES | REACTOME_TRANSMISSION_ACROSS_CHEMICAL_SYNAPSES        | 0.81            |
| ENSG00000170296                                | GABARAP PPI subnetwork                                | 0.81            |
| GO:0008528                                     | G-protein coupled peptide receptor activity           | 0.81            |
| GO:0006913                                     | nucleocytoplasmic transport                           | 0.81            |
| GO:0031644                                     | regulation of neurological system process             | 0.81            |
| ENSG00000174243                                | DDX23 PPI subnetwork                                  | 0.81            |
| GO:0032467                                     | positive regulation of cytokinesis                    | 0.81            |
| ENSG00000169621                                | APLF PPI subnetwork                                   | 0.81            |
| GO:0030816                                     | positive regulation of cAMP metabolic process         | 0.81            |
| GO:0030819                                     | positive regulation of cAMP biosynthetic process      | 0.81            |
| ENSG00000166579                                | NDEL1 PPI subnetwork                                  | 0.81            |
| REACTOME_NCAM1_INTERACTIONS                    | REACTOME_NCAM1_INTERACTIONS                           | 0.81            |
| GO:0051046                                     | regulation of secretion                               | 0.81            |
| ENSG00000106299                                | WASL PPI subnetwork                                   | 0.81            |
| ENSG00000206505                                | HLA-A PPI subnetwork                                  | 0.81            |
| GO:0097061                                     | dendritic spine organization                          | 0.81            |
| GO:0060997                                     | dendritic spine morphogenesis                         | 0.81            |
| ENSG00000129514                                | FOXA1 PPI subnetwork                                  | 0.81            |
| ENSG00000211895                                | ENSG00000211895 PPI subnetwork                        | 0.81            |
| ENSG00000180353                                | HCLS1 PPI subnetwork                                  | 0.81            |
| ENSG00000144231                                | POLR2D PPI subnetwork                                 | 0.81            |
| MP:0001433                                     | polyphagia                                            | 0.81            |
| MP:0002106                                     | abnormal muscle physiology                            | 0.81            |
| GO:0070717                                     | poly-purine tract binding                             | 0.81            |
| ENSG00000099995                                | SF3A1 PPI subnetwork                                  | 0.81            |
| ENSG00000163132                                | MSX1 PPI subnetwork                                   | 0.81            |
| ENSG00000060069                                | CTDP1 PPI subnetwork                                  | 0.81            |
| GO:0044243                                     | multicellular organismal catabolic process            | 0.81            |

| Original gene set ID                | Original gene set description                       | Nominal P value |
|-------------------------------------|-----------------------------------------------------|-----------------|
| MP:0001544                          | abnormal cardiovascular system physiology           | 0.81            |
| ENSG00000163041                     | H3F3A PPI subnetwork                                | 0.81            |
| ENSG00000132475                     | H3F3B PPI subnetwork                                | 0.81            |
| ENSG00000196285                     | ENSG00000196285 PPI subnetwork                      | 0.81            |
| ENSG00000079739                     | PGM1 PPI subnetwork                                 | 0.81            |
| GO:0018209                          | peptidyl-serine modification                        | 0.81            |
| MP:0005642                          | decreased mean corpuscular hemoglobin concentration | 0.81            |
| MP:0001473                          | reduced long term potentiation                      | 0.81            |
| ENSG00000154582                     | TCEB1 PPI subnetwork                                | 0.81            |
| ENSG00000186318                     | BACE1 PPI subnetwork                                | 0.81            |
| GO:0009309                          | amine biosynthetic process                          | 0.81            |
| REACTOME_GABA_A_RECEPTOR_ACTIVATION | REACTOME_GABA_A_RECEPTOR_ACTIVATION                 | 0.81            |
| ENSG00000108840                     | HDAC5 PPI subnetwork                                | 0.81            |
| GO:0060968                          | regulation of gene silencing                        | 0.81            |
| GO:0051351                          | positive regulation of ligase activity              | 0.81            |
| GO:0046640                          | regulation of alpha-beta T cell proliferation       | 0.81            |
| ENSG00000064995                     | TAF11 PPI subnetwork                                | 0.81            |
| ENSG00000185049                     | WHSC2 PPI subnetwork                                | 0.81            |
| GO:0003012                          | muscle system process                               | 0.81            |
| GO:0005776                          | autophagic vacuole                                  | 0.81            |
| GO:0070507                          | regulation of microtubule cytoskeleton organizior   | 0.81            |
| MP:0003130                          | anal atresia                                        | 0.81            |
| ENSG00000070950                     | RAD18 PPI subnetwork                                | 0.81            |
| GO:0050662                          | coenzyme binding                                    | 0.81            |
| GO:0030514                          | negative regulation of BMP signaling pathway        | 0.81            |
| ENSG00000175166                     | PSMD2 PPI subnetwork                                | 0.81            |
| GO:0072207                          | metanephric epithelium development                  | 0.81            |
| GO:0045494                          | photoreceptor cell maintenance                      | 0.81            |
| ENSG00000105894                     | PTN PPI subnetwork                                  | 0.81            |
| MP:0000690                          | absent spleen                                       | 0.81            |
| ENSG00000141570                     | CBX8 PPI subnetwork                                 | 0.81            |
| GO:0051606                          | detection of stimulus                               | 0.81            |
| GO:0050769                          | positive regulation of neurogenesis                 | 0.81            |
| GO:0019825                          | oxygen binding                                      | 0.81            |
| ENSG00000130713                     | EXOSC2 PPI subnetwork                               | 0.81            |
| ENSG00000072501                     | SMC1A PPI subnetwork                                | 0.81            |
| REACTOME_CA:DEPENDENT_EVENTS        | REACTOME_CA:DEPENDENT_EVENTS                        | 0.81            |
| MP:0004145                          | abnormal muscle electrophysiology                   | 0.81            |
| ENSG00000174622                     | ENSG00000174622 PPI subnetwork                      | 0.81            |
| GO:0043954                          | cellular component maintenance                      | 0.81            |
| GO:0009065                          | glutamine family amino acid catabolic process       | 0.81            |
| ENSG00000100084                     | HIRA PPI subnetwork                                 | 0.81            |
| ENSG00000153201                     | RANBP2 PPI subnetwork                               | 0.81            |
| MP:0008484                          | decreased spleen germinal center size               | 0.81            |
| GO:0060740                          | prostate gland epithelium morphogenesis             | 0.81            |
| ENSG00000134640                     | MTNR1B PPI subnetwork                               | 0.81            |
| MP:0005264                          | glomerulosclerosis                                  | 0.81            |
| GO:0090276                          | regulation of peptide hormone secretion             | 0.81            |
| GO:0005876                          | spindle microtubule                                 | 0.81            |





| Original gene set ID                                         | Original gene set description                                   | Nominal P value |
|--------------------------------------------------------------|-----------------------------------------------------------------|-----------------|
| ENSG00000129170                                              | CSRP3 PPI subnetwork                                            | 0.82            |
| GO:0042776                                                   | mitochondrial ATP synthesis coupled proton transport            | 0.82            |
| MP:0001968                                                   | abnormal touch/ nociception                                     | 0.82            |
| KEGG_GAP_JUNCTION                                            | KEGG_GAP_JUNCTION                                               | 0.82            |
| REACTOME_FORMATION_OF_RNA_POL_II_ELONGATION_COMPLEX          | REACTOME_FORMATION_OF_RNA_POL_II_ELONGATION_COMPLEX             | 0.82            |
| REACTOME_RNA_POLYMERASE_II_TRANSCRIPTION_ELONGATION          | REACTOME_RNA_POLYMERASE_II_TRANSCRIPTION_ELONGATION             | 0.82            |
| REACTOME_FORMATION_OF_HIV:1_ELONGATION_COMPLEX_IN_THE_ABSENC | REACTOME_FORMATION_OF_HIV:1_ELONGATION_COMPLEX_IN_THE_ABSENCE_O | 0.82            |
| MP:0008661                                                   | decreased interleukin-10 secretion                              | 0.82            |
| ENSG00000143702                                              | CEP170 PPI subnetwork                                           | 0.82            |
| GO:0046961                                                   | proton-transporting ATPase activity, rotational mechanism       | 0.82            |
| MP:0005449                                                   | abnormal food intake                                            | 0.82            |
| ENSG00000090273                                              | NUDC PPI subnetwork                                             | 0.82            |
| GO:0045259                                                   | proton-transporting ATP synthase complex                        | 0.82            |
| GO:0021511                                                   | spinal cord patterning                                          | 0.82            |
| ENSG00000111361                                              | EIF2B1 PPI subnetwork                                           | 0.82            |
| GO:0051932                                                   | synaptic transmission, GABAergic                                | 0.82            |
| GO:0009306                                                   | protein secretion                                               | 0.82            |
| GO:0042744                                                   | hydrogen peroxide catabolic process                             | 0.82            |
| ENSG00000136152                                              | COG3 PPI subnetwork                                             | 0.82            |
| ENSG00000196961                                              | AP2A1 PPI subnetwork                                            | 0.82            |
| ENSG00000102096                                              | PIM2 PPI subnetwork                                             | 0.82            |
| ENSG00000169439                                              | SDC2 PPI subnetwork                                             | 0.82            |
| GO:0048645                                                   | organ formation                                                 | 0.82            |
| ENSG00000185624                                              | P4HB PPI subnetwork                                             | 0.82            |
| ENSG00000080986                                              | NDC80 PPI subnetwork                                            | 0.82            |
| GO:0097060                                                   | synaptic membrane                                               | 0.82            |
| GO:0007632                                                   | visual behavior                                                 | 0.82            |
| MP:0004462                                                   | small basisphenoid bone                                         | 0.82            |
| GO:0003785                                                   | actin monomer binding                                           | 0.82            |
| REACTOME_GLUCAGON_SIGNALING_IN_METABOLIC_REGULATION          | REACTOME_GLUCAGON_SIGNALING_IN_METABOLIC_REGULATION             | 0.82            |
| GO:0050432                                                   | catecholamine secretion                                         | 0.82            |
| GO:0031267                                                   | small GTPase binding                                            | 0.82            |
| MP:0005352                                                   | small cranium                                                   | 0.82            |
| MP:0009712                                                   | impaired conditioned place preference behavior                  | 0.82            |
| ENSG00000175115                                              | PACS1 PPI subnetwork                                            | 0.82            |
| ENSG00000091651                                              | ORC6 PPI subnetwork                                             | 0.82            |
| GO:0005525                                                   | GTP binding                                                     | 0.82            |
| ENSG00000089280                                              | FUS PPI subnetwork                                              | 0.82            |
| GO:0034704                                                   | calcium channel complex                                         | 0.82            |
| ENSG00000214122                                              | ENSG00000214122 PPI subnetwork                                  | 0.82            |
| ENSG00000145241                                              | CENPC1 PPI subnetwork                                           | 0.82            |
| ENSG00000117713                                              | ARID1A PPI subnetwork                                           | 0.82            |
| ENSG00000139546                                              | TARBP2 PPI subnetwork                                           | 0.82            |
| ENSG00000213672                                              | NCKIPSD PPI subnetwork                                          | 0.82            |
| ENSG00000170927                                              | PKHD1 PPI subnetwork                                            | 0.82            |
| ENSG00000080345                                              | RIF1 PPI subnetwork                                             | 0.82            |
| GO:0001660                                                   | fever generation                                                | 0.82            |
| ENSG00000131795                                              | RBM8A PPI subnetwork                                            | 0.82            |
| ENSG00000015285                                              | WAS PPI subnetwork                                              | 0.82            |

| Original gene set ID                                            | Original gene set description                                                     | Nominal P value |
|-----------------------------------------------------------------|-----------------------------------------------------------------------------------|-----------------|
| GO:0006103                                                      | 2-oxoglutarate metabolic process                                                  | 0.82            |
| ENSG00000116350                                                 | SRSF4 PPI subnetwork                                                              | 0.83            |
| GO:0030073                                                      | insulin secretion                                                                 | 0.83            |
| GO:0007602                                                      | phototransduction                                                                 | 0.83            |
| GO:0032281                                                      | alpha-amino-3-hydroxy-5-methyl-4-isoxazolepropionic acid selective glutamate rece | 0.83            |
| GO:0032153                                                      | cell division site                                                                | 0.83            |
| GO:0032155                                                      | cell division site part                                                           | 0.83            |
| MP:0005027                                                      | increased susceptibility to parasitic infectior                                   | 0.83            |
| ENSG00000125651                                                 | GTF2F1 PPI subnetwork                                                             | 0.83            |
| REACTOME_TAT:MEDIATED_ELONGATION_OF_THE_HIV:1_TRANSCRIPT        | REACTOME_TAT:MEDIATED_ELONGATION_OF_THE_HIV:1_TRANSCRIPT                          | 0.83            |
| REACTOME_HIV:1_TRANSCRIPTION_ELONGATION                         | REACTOME_HIV:1_TRANSCRIPTION_ELONGATION                                           | 0.83            |
| REACTOME_FORMATION_OF_HIV:1_ELONGATION_COMPLEX_CONTAINING_HI    | REACTOME_FORMATION_OF_HIV:1_ELONGATION_COMPLEX_CONTAINING_HIV:1_                  | 0.83            |
| ENSG00000163541                                                 | SUCLG1 PPI subnetwork                                                             | 0.83            |
| MP:0010053                                                      | decreased grip strength                                                           | 0.83            |
| ENSG00000077420                                                 | APBB1P PPI subnetwork                                                             | 0.83            |
| GO:0051168                                                      | nuclear export                                                                    | 0.83            |
| GO:0006997                                                      | nucleus organization                                                              | 0.83            |
| ENSG00000167110                                                 | GOLGA2 PPI subnetwork                                                             | 0.83            |
| GO:0009581                                                      | detection of external stimulus                                                    | 0.83            |
| ENSG00000159131                                                 | GART PPI subnetwork                                                               | 0.83            |
| ENSG00000168148                                                 | HIST3H3 PPI subnetwork                                                            | 0.83            |
| ENSG00000165916                                                 | PSMC3 PPI subnetwork                                                              | 0.83            |
| ENSG00000073792                                                 | IGF2BP2 PPI subnetwork                                                            | 0.83            |
| ENSG00000072315                                                 | TRPC5 PPI subnetwork                                                              | 0.83            |
| GO:0030574                                                      | collagen catabolic process                                                        | 0.83            |
| ENSG00000158869                                                 | FCER1G PPI subnetwork                                                             | 0.83            |
| MP:0003861                                                      | abnormal nervous system development                                               | 0.83            |
| ENSG00000013573                                                 | DDX11 PPI subnetwork                                                              | 0.83            |
| GO:0001508                                                      | regulation of action potential                                                    | 0.83            |
| MP:0003924                                                      | herniated diaphragm                                                               | 0.83            |
| GO:0031076                                                      | embryonic camera-type eye development                                             | 0.83            |
| ENSG00000122126                                                 | OCRL PPI subnetwork                                                               | 0.83            |
| ENSG00000168291                                                 | PDHB PPI subnetwork                                                               | 0.83            |
| ENSG00000183395                                                 | PMCH PPI subnetwork                                                               | 0.83            |
| ENSG00000182054                                                 | IDH2 PPI subnetwork                                                               | 0.83            |
| REACTOME_GLOBAL_GENOMIC_NER_GG:NER                              | REACTOME_GLOBAL_GENOMIC_NER_GG:NER                                                | 0.83            |
| MP:0005107                                                      | abnormal stapes morphology                                                        | 0.83            |
| GO:0005484                                                      | SNAP receptor activity                                                            | 0.83            |
| MP:0003992                                                      | increased mortality induced by ionizing radiatior                                 | 0.83            |
| GO:0019829                                                      | cation-transporting ATPase activity                                               | 0.83            |
| ENSG00000167283                                                 | ATP5L PPI subnetwork                                                              | 0.83            |
| GO:0042730                                                      | fibrinolysis                                                                      | 0.83            |
| GO:0034654                                                      | nucleobase-containing compound biosynthetic process                               | 0.83            |
| REACTOME_HIV:1_TRANSCRIPTION_INITIATION                         | REACTOME_HIV:1_TRANSCRIPTION_INITIATION                                           | 0.83            |
| REACTOME_RNA_POLYMERASE_II_TRANSCRIPTION_PRE:INITIATION_AND_PRO | REACTOME_RNA_POLYMERASE_II_TRANSCRIPTION_PRE:INITIATION_AND_PROMO                 | 0.83            |
| REACTOME_RNA_POLYMERASE_II_TRANSCRIPTION_INITIATION             | REACTOME_RNA_POLYMERASE_II_TRANSCRIPTION_INITIATION                               | 0.83            |
| REACTOME_RNA_POLYMERASE_II_HIV:1_PROMOTER_ESCAPE                | REACTOME_RNA_POLYMERASE_II_HIV:1_PROMOTER_ESCAPE                                  | 0.83            |
| REACTOME_RNA_POLYMERASE_II_TRANSCRIPTION_INITIATION_AND_PROMOT  | REACTOME_RNA_POLYMERASE_II_TRANSCRIPTION_INITIATION_AND_PROMOTER_                 | 0.83            |
| REACTOME_RNA_POLYMERASE_II_PROMOTER_ESCAPE                      | REACTOME_RNA_POLYMERASE_II_PROMOTER_ESCAPE                                        | 0.83            |

| Original gene set ID                                            | Original gene set description                                                           | Nominal P value |
|-----------------------------------------------------------------|-----------------------------------------------------------------------------------------|-----------------|
| GO:0051437                                                      | positive regulation of ubiquitin-protein ligase activity involved in mitotic cell cycle | 0.83            |
| ENSG00000185532                                                 | PRKG1 PPI subnetwork                                                                    | 0.83            |
| ENSG00000089169                                                 | RPH3A PPI subnetwork                                                                    | 0.83            |
| GO:0015980                                                      | energy derivation by oxidation of organic compounds                                     | 0.83            |
| ENSG00000160062                                                 | ZBTB8A PPI subnetwork                                                                   | 0.83            |
| MP:0000933                                                      | abnormal rhombomere morphology                                                          | 0.83            |
| ENSG00000178952                                                 | TUFM PPI subnetwork                                                                     | 0.83            |
| GO:0033044                                                      | regulation of chromosome organization                                                   | 0.83            |
| GO:0016701                                                      | oxidoreductase activity, acting on single donors with incorporation of molecular oxy    | 0.83            |
| ENSG00000160803                                                 | UBQLN4 PPI subnetwork                                                                   | 0.83            |
| ENSG00000100519                                                 | PSMC6 PPI subnetwork                                                                    | 0.83            |
| ENSG00000073050                                                 | XRCC1 PPI subnetwork                                                                    | 0.83            |
| GO:0018130                                                      | heterocycle biosynthetic process                                                        | 0.83            |
| ENSG00000078140                                                 | UBE2K PPI subnetwork                                                                    | 0.83            |
| ENSG00000171475                                                 | WIPF2 PPI subnetwork                                                                    | 0.83            |
| MP:0001666                                                      | abnormal intestinal absorption                                                          | 0.83            |
| ENSG00000146047                                                 | HIST1H2BA PPI subnetwork                                                                | 0.83            |
| GO:0016445                                                      | somatic diversification of immunoglobulins                                              | 0.83            |
| ENSG00000150753                                                 | CCT5 PPI subnetwork                                                                     | 0.83            |
| GO:0009074                                                      | aromatic amino acid family catabolic process                                            | 0.83            |
| ENSG00000171195                                                 | MUC7 PPI subnetwork                                                                     | 0.83            |
| GO:0006901                                                      | vesicle coating                                                                         | 0.83            |
| KEGG_RETINOL_METABOLISM                                         | KEGG_RETINOL_METABOLISM                                                                 | 0.83            |
| GO:0007271                                                      | synaptic transmission, cholinergic                                                      | 0.83            |
| GO:0006278                                                      | RNA-dependent DNA replication                                                           | 0.83            |
| MP:0004756                                                      | abnormal proximal convoluted tubule morphology                                          | 0.83            |
| REACTOME_THE_ROLE_OF_NEF_IN_HIV:1_REPLICATION_AND_DISEASE_PATHC | REACTOME_THE_ROLE_OF_NEF_IN_HIV:1_REPLICATION_AND_DISEASE_PATHOGEN                      | 0.83            |
| ENSG00000129152                                                 | MYOD1 PPI subnetwork                                                                    | 0.83            |
| MP:0001693                                                      | failure of primitive streak formation                                                   | 0.83            |
| GO:0000209                                                      | protein polyubiquitination                                                              | 0.83            |
| ENSG00000198211                                                 | TUBB3 PPI subnetwork                                                                    | 0.83            |
| ENSG00000176788                                                 | BASP1 PPI subnetwork                                                                    | 0.83            |
| ENSG00000094804                                                 | CDC6 PPI subnetwork                                                                     | 0.83            |
| ENSG00000068796                                                 | KIF2A PPI subnetwork                                                                    | 0.83            |
| MP:0010868                                                      | increased bone trabecula number                                                         | 0.83            |
| GO:0016675                                                      | oxidoreductase activity, acting on a heme group of donors                               | 0.83            |
| GO:0051339                                                      | regulation of lyase activity                                                            | 0.83            |
| ENSG00000176248                                                 | ANAPC2 PPI subnetwork                                                                   | 0.83            |
| ENSG00000156467                                                 | UQCRB PPI subnetwork                                                                    | 0.83            |
| GO:0005813                                                      | centrosome                                                                              | 0.83            |
| ENSG00000135213                                                 | POM121C PPI subnetwork                                                                  | 0.83            |
| ENSG00000119383                                                 | PPP2R4 PPI subnetwork                                                                   | 0.83            |
| ENSG00000184381                                                 | PLA2G6 PPI subnetwork                                                                   | 0.83            |
| ENSG00000138778                                                 | CENPE PPI subnetwork                                                                    | 0.83            |
| ENSG00000167549                                                 | CORO6 PPI subnetwork                                                                    | 0.83            |
| GO:0005126                                                      | cytokine receptor binding                                                               | 0.83            |
| ENSG00000188170                                                 | ENSG00000188170 PPI subnetwork                                                          | 0.83            |
| REACTOME_FORMATION_OF_ATP_BY_CHEMIOSMOTIC_COUPLING              | REACTOME_FORMATION_OF_ATP_BY_CHEMIOSMOTIC_COUPLING                                      | 0.83            |
| REACTOME_EGFR_DOWNREGULATION                                    | REACTOME_EGFR_DOWNREGULATION                                                            | 0.83            |

| Original gene set ID                                     | Original gene set description                                                           | Nominal P value |
|----------------------------------------------------------|-----------------------------------------------------------------------------------------|-----------------|
| ENSG00000130340                                          | SNX9 PPI subnetwork                                                                     | 0.83            |
| GO:0005849                                               | mRNA cleavage factor complex                                                            | 0.83            |
| GO:0048305                                               | immunoglobulin secretion                                                                | 0.83            |
| REACTOME_PKA_ACTIVATION                                  | REACTOME_PKA_ACTIVATION                                                                 | 0.83            |
| REACTOME_PROCESSING_OF_CAPPED_INTRON:CONTAINING_PRE:MRNA | REACTOME_PROCESSING_OF_CAPPED_INTRON:CONTAINING_PRE:MRNA                                | 0.83            |
| ENSG00000177084                                          | POLE PPI subnetwork                                                                     | 0.83            |
| ENSG00000163161                                          | ERCC3 PPI subnetwork                                                                    | 0.83            |
| ENSG00000133116                                          | KL PPI subnetwork                                                                       | 0.83            |
| ENSG00000141034                                          | C17orf39 PPI subnetwork                                                                 | 0.83            |
| ENSG00000110801                                          | PSMD9 PPI subnetwork                                                                    | 0.83            |
| ENSG00000150086                                          | GRIN2B PPI subnetwork                                                                   | 0.83            |
| ENSG00000159164                                          | SV2A PPI subnetwork                                                                     | 0.83            |
| GO:0050670                                               | regulation of lymphocyte proliferation                                                  | 0.83            |
| GO:0051169                                               | nuclear transport                                                                       | 0.84            |
| ENSG00000091181                                          | IL5RA PPI subnetwork                                                                    | 0.84            |
| GO:0009070                                               | serine family amino acid biosynthetic process                                           | 0.84            |
| MP:0003311                                               | aminoaciduria                                                                           | 0.84            |
| REACTOME_MRNA_SPLICING_:_MINOR_PATHWAY                   | REACTOME_MRNA_SPLICING_:_MINOR_PATHWAY                                                  | 0.84            |
| ENSG00000112379                                          | KIAA1244 PPI subnetwork                                                                 | 0.84            |
| MP:0001415                                               | increased exploration in new environment                                                | 0.84            |
| GO:0006260                                               | DNA replication                                                                         | 0.84            |
| GO:0009584                                               | detection of visible light                                                              | 0.84            |
| ENSG00000100292                                          | HMOX1 PPI subnetwork                                                                    | 0.84            |
| ENSG00000178741                                          | COX5A PPI subnetwork                                                                    | 0.84            |
| GO:0090101                                               | negative regulation of transmembrane receptor protein serine/threonine kinase signaling | 0.84            |
| GO:0031279                                               | regulation of cyclase activity                                                          | 0.84            |
| MP:0006108                                               | abnormal hindbrain development                                                          | 0.84            |
| GO:0031401                                               | positive regulation of protein modification process                                     | 0.84            |
| MP:0002753                                               | dilated heart left ventricle                                                            | 0.84            |
| GO:0008188                                               | neuropeptide receptor activity                                                          | 0.84            |
| ENSG00000132464                                          | ENAM PPI subnetwork                                                                     | 0.84            |
| ENSG00000075785                                          | RAB7A PPI subnetwork                                                                    | 0.84            |
| GO:0006206                                               | pyrimidine base metabolic process                                                       | 0.84            |
| GO:0016879                                               | ligase activity, forming carbon-nitrogen bonds                                          | 0.84            |
| ENSG00000133226                                          | SRRM1 PPI subnetwork                                                                    | 0.84            |
| GO:0016918                                               | retinal binding                                                                         | 0.84            |
| ENSG00000111786                                          | SRSF9 PPI subnetwork                                                                    | 0.84            |
| GO:0004222                                               | metalloendopeptidase activity                                                           | 0.84            |
| GO:0048037                                               | cofactor binding                                                                        | 0.84            |
| REACTOME_DEADENYLATION:DEPENDENT_MRNA_DECAY              | REACTOME_DEADENYLATION:DEPENDENT_MRNA_DECAY                                             | 0.84            |
| GO:0006091                                               | generation of precursor metabolites and energy                                          | 0.84            |
| GO:0009607                                               | response to biotic stimulus                                                             | 0.84            |
| ENSG00000204356                                          | RDBP PPI subnetwork                                                                     | 0.84            |
| ENSG00000206268                                          | RDBP PPI subnetwork                                                                     | 0.84            |
| ENSG00000206357                                          | RDBP PPI subnetwork                                                                     | 0.84            |
| ENSG00000183625                                          | CCR3 PPI subnetwork                                                                     | 0.84            |
| ENSG00000160201                                          | U2AF1 PPI subnetwork                                                                    | 0.84            |
| ENSG00000100650                                          | SRSF5 PPI subnetwork                                                                    | 0.84            |
| ENSG00000156261                                          | CCT8 PPI subnetwork                                                                     | 0.84            |



## Original gene set ID

ENSG00000122180  
 ENSG00000144642  
 GO:0005125  
 ENSG00000180190  
 ENSG00000151224  
 GO:0032633  
 ENSG00000164815  
 ENSG00000101413  
 ENSG00000156049  
 ENSG00000125351  
 GO:0051054  
 MP:0000877  
 MP:0003730  
 GO:0032784  
 GO:0002474  
 ENSG00000149311  
 GO:0060512  
 MP:0000929  
 GO:0042613  
 GO:0000375  
 REACTOME\_E2F\_MEDIATED\_REGULATION\_OF\_DNA\_REPLICATION  
 ENSG00000134602  
 ENSG00000085662  
 GO:0009635  
 GO:0008353  
 REACTOME\_MUSCLE\_CONTRACTION  
 GO:0006220  
 GO:0043395  
 GO:0007033  
 MP:0004073  
 REACTOME\_PROCESSING\_OF\_INTRONLESS\_PRE:MRNAS  
 REACTOME\_MRNA\_PROCESSING  
 GO:0006511  
 GO:0000152  
 GO:0004993  
 ENSG00000138385  
 ENSG00000172409  
 GO:0009165  
 ENSG00000163737  
 REACTOME\_DNA\_REPAIR  
 ENSG00000169020  
 GO:0006813  
 REACTOME\_TRANSCRIPTION\_OF\_THE\_HIV\_GENOME  
 GO:0030312  
 GO:0006140  
 ENSG00000100804  
 MP:0005650  
 MP:0002718  
 REACTOME\_MYOGENESIS

## Original gene set description

MYOG PPI subnetwork  
 RBMS3 PPI subnetwork  
 cytokine activity  
 C8orf42 PPI subnetwork  
 MAT1A PPI subnetwork  
 interleukin-4 production  
 ORC5 PPI subnetwork  
 RPRD1B PPI subnetwork  
 GNA14 PPI subnetwork  
 UPF3B PPI subnetwork  
 positive regulation of DNA metabolic process  
 abnormal Purkinje cell morphology  
 abnormal photoreceptor inner segment morphology  
 regulation of transcription elongation, DNA-dependent  
 antigen processing and presentation of peptide antigen via MHC class  
 ATM PPI subnetwork  
 prostate gland morphogenesis  
 open neural tube  
 MHC class II protein complex  
 RNA splicing, via transesterification reactions  
 REACTOME\_E2F\_MEDIATED\_REGULATION\_OF\_DNA\_REPLICATION  
 ENSG00000134602 PPI subnetwork  
 AKR1B1 PPI subnetwork  
 response to herbicide  
 RNA polymerase II carboxy-terminal domain kinase activity  
 REACTOME\_MUSCLE\_CONTRACTION  
 pyrimidine nucleotide metabolic process  
 heparan sulfate proteoglycan binding  
 vacuole organization  
 caudal body truncation  
 REACTOME\_PROCESSING\_OF\_INTRONLESS\_PRE:MRNAS  
 REACTOME\_MRNA\_PROCESSING  
 ubiquitin-dependent protein catabolic process  
 nuclear ubiquitin ligase complex  
 serotonin receptor activity  
 SSB PPI subnetwork  
 CLP1 PPI subnetwork  
 nucleotide biosynthetic process  
 PF4 PPI subnetwork  
 REACTOME\_DNA\_REPAIR  
 ATP5I PPI subnetwork  
 potassium ion transport  
 REACTOME\_TRANSCRIPTION\_OF\_THE\_HIV\_GENOME  
 external encapsulating structure  
 regulation of nucleotide metabolic process  
 PSMB5 PPI subnetwork  
 abnormal limb bud morphology  
 abnormal inner cell mass morphology  
 REACTOME\_MYOGENESIS

## Nominal P value

0.84  
 0.84  
 0.84  
 0.84  
 0.84  
 0.84  
 0.84  
 0.84  
 0.84  
 0.84  
 0.84  
 0.84  
 0.84  
 0.84  
 0.84  
 0.84  
 0.84  
 0.84  
 0.84  
 0.84  
 0.84  
 0.84  
 0.84  
 0.84  
 0.84  
 0.84  
 0.84  
 0.84  
 0.84  
 0.84  
 0.84  
 0.84  
 0.84  
 0.84  
 0.84  
 0.84  
 0.85  
 0.85  
 0.85  
 0.85  
 0.85  
 0.85  
 0.85  
 0.85  
 0.85  
 0.85  
 0.85  
 0.85  
 0.85  
 0.85  
 0.85  
 0.85  
 0.85  
 0.85

| Original gene set ID                                                    | Original gene set description                                           | Nominal P value |
|-------------------------------------------------------------------------|-------------------------------------------------------------------------|-----------------|
| REACTOME_CDO_IN_MYOGENESIS                                              | REACTOME_CDO_IN_MYOGENESIS                                              | 0.85            |
| GO:0048813                                                              | dendrite morphogenesis                                                  | 0.85            |
| MP:0009336                                                              | increased splenocyte proliferation                                      | 0.85            |
| ENSG00000060339                                                         | CCAR1 PPI subnetwork                                                    | 0.85            |
| GO:0030838                                                              | positive regulation of actin filament polymerization                    | 0.85            |
| GO:0050807                                                              | regulation of synapse organization                                      | 0.85            |
| MP:0003290                                                              | intestinal hypoperistalsis                                              | 0.85            |
| REACTOME_TRANSPORT_OF_MATURE_MRNA_DERIVED_FROM_AN_INTRONLESS_TRANSCRIPT | REACTOME_TRANSPORT_OF_MATURE_MRNA_DERIVED_FROM_AN_INTRONLESS_TRANSCRIPT | 0.85            |
| GO:0009799                                                              | specification of symmetry                                               | 0.85            |
| ENSG00000115145                                                         | STAM2 PPI subnetwork                                                    | 0.85            |
| GO:0032944                                                              | regulation of mononuclear cell proliferation                            | 0.85            |
| MP:0000272                                                              | abnormal aorta morphology                                               | 0.85            |
| GO:0015812                                                              | gamma-aminobutyric acid transport                                       | 0.85            |
| ENSG00000115875                                                         | SRSF7 PPI subnetwork                                                    | 0.85            |
| GO:0042220                                                              | response to cocaine                                                     | 0.85            |
| GO:0014073                                                              | response to tropane                                                     | 0.85            |
| ENSG00000171724                                                         | VAT1L PPI subnetwork                                                    | 0.85            |
| MP:0002575                                                              | increased circulating ketone body level                                 | 0.85            |
| GO:0004842                                                              | ubiquitin-protein ligase activity                                       | 0.85            |
| ENSG00000109111                                                         | SUPT6H PPI subnetwork                                                   | 0.85            |
| ENSG00000144028                                                         | SNRNP200 PPI subnetwork                                                 | 0.85            |
| MP:0000266                                                              | abnormal heart morphology                                               | 0.85            |
| ENSG00000142039                                                         | CCDC97 PPI subnetwork                                                   | 0.85            |
| GO:0005815                                                              | microtubule organizing center                                           | 0.85            |
| GO:0048701                                                              | embryonic cranial skeleton morphogenesis                                | 0.85            |
| ENSG00000198523                                                         | PLN PPI subnetwork                                                      | 0.85            |
| GO:0051443                                                              | positive regulation of ubiquitin-protein ligase activity                | 0.85            |
| ENSG00000136450                                                         | SRSF1 PPI subnetwork                                                    | 0.85            |
| GO:0042743                                                              | hydrogen peroxide metabolic process                                     | 0.85            |
| REACTOME_SIGNALLING_TO_P38_VIA_RIT_AND_RIN                              | REACTOME_SIGNALLING_TO_P38_VIA_RIT_AND_RIN                              | 0.85            |
| ENSG00000205531                                                         | NAP1L4 PPI subnetwork                                                   | 0.85            |
| ENSG00000088256                                                         | GNA11 PPI subnetwork                                                    | 0.85            |
| ENSG00000157020                                                         | SEC13 PPI subnetwork                                                    | 0.85            |
| REACTOME_PKA_ACTIVATION_IN_GLUCAGON_SIGNALLING                          | REACTOME_PKA_ACTIVATION_IN_GLUCAGON_SIGNALLING                          | 0.85            |
| REACTOME_CALCITONIN-LIKE_LIGAND_RECEPTORS                               | REACTOME_CALCITONIN-LIKE_LIGAND_RECEPTORS                               | 0.85            |
| ENSG00000110717                                                         | NDUFS8 PPI subnetwork                                                   | 0.85            |
| ENSG00000102387                                                         | TAF7L PPI subnetwork                                                    | 0.85            |
| ENSG00000129084                                                         | PSMA1 PPI subnetwork                                                    | 0.85            |
| ENSG00000100280                                                         | AP1B1 PPI subnetwork                                                    | 0.85            |
| GO:0006360                                                              | transcription from RNA polymerase I promoter                            | 0.85            |
| GO:0051536                                                              | iron-sulfur cluster binding                                             | 0.85            |
| GO:0051540                                                              | metal cluster binding                                                   | 0.85            |
| ENSG00000134444                                                         | KIAA1468 PPI subnetwork                                                 | 0.85            |
| GO:0016032                                                              | viral reproduction                                                      | 0.85            |
| ENSG00000141232                                                         | TOB1 PPI subnetwork                                                     | 0.85            |
| GO:0030239                                                              | myofibril assembly                                                      | 0.85            |
| MP:0006089                                                              | abnormal vestibular sacculle morphology                                 | 0.85            |
| ENSG00000105705                                                         | SUGP1 PPI subnetwork                                                    | 0.85            |
| MP:0003149                                                              | abnormal tectorial membrane morphology                                  | 0.85            |



**Original gene set ID**

ENSG00000142949

GO:0019882

REACTOME\_REGULATION\_OF\_WATER\_BALANCE\_BY\_RENAL\_AQUAPORINS

GO:0015035

GO:0016627

GO:0016836

GO:0001906

ENSG00000159186

ENSG00000122565

ENSG00000182004

REACTOME\_TRANSPORT\_OF\_THE\_SLBP\_INDEPENDENT\_MATURE\_MRNA

GO:0006986

GO:0051865

GO:0061326

ENSG00000101138

GO:0015850

KEGG\_BETA\_ALANINE\_METABOLISM

ENSG00000141200

GO:0046034

ENSG00000039123

GO:0021516

ENSG00000154839

GO:0006941

MP:0002894

GO:0016410

ENSG00000147274

ENSG00000165659

GO:0019400

ENSG00000137177

ENSG00000121542

KEGG\_ALANINE\_ASPARTATE\_AND\_GLUTAMATE\_METABOLISM

GO:0043394

GO:0046135

KEGG\_VIRAL\_MYOCARDITIS

ENSG00000198961

ENSG00000167005

GO:0000398

GO:0000377

ENSG00000123360

ENSG00000198730

ENSG00000115524

GO:0006402

GO:0007004

GO:0018105

GO:0051444

GO:0051352

GO:0021545

GO:0072498

GO:0031400

**Original gene set description**

PTPRF PPI subnetwork

antigen processing and presentation

REACTOME\_REGULATION\_OF\_WATER\_BALANCE\_BY\_RENAL\_AQUAPORINS

protein disulfide oxidoreductase activity

oxidoreductase activity, acting on the CH-CH group of donors

hydro-lyase activity

cell killing

ENSG00000159186 PPI subnetwork

CBX3 PPI subnetwork

SNRPE PPI subnetwork

REACTOME\_TRANSPORT\_OF\_THE\_SLBP\_INDEPENDENT\_MATURE\_MRNA

response to unfolded protein

protein autoubiquitination

renal tubule development

CSTF1 PPI subnetwork

organic alcohol transport

KEGG\_BETA\_ALANINE\_METABOLISM

KIF2B PPI subnetwork

ATP metabolic process

SKIV2L2 PPI subnetwork

dorsal spinal cord development

SKA1 PPI subnetwork

striated muscle contraction

abnormal otolith morphology

N-acyltransferase activity

RBMX PPI subnetwork

DACH1 PPI subnetwork

alditol metabolic process

KIF13A PPI subnetwork

SEC22A PPI subnetwork

KEGG\_ALANINE\_ASPARTATE\_AND\_GLUTAMATE\_METABOLISM

proteoglycan binding

pyrimidine nucleoside catabolic process

KEGG\_VIRAL\_MYOCARDITIS

PJA2 PPI subnetwork

NUDT21 PPI subnetwork

nuclear mRNA splicing, via spliceosome

RNA splicing, via transesterification reactions with bulged adenosine as nucleophile

PDE1B PPI subnetwork

CTR9 PPI subnetwork

SF3B1 PPI subnetwork

mRNA catabolic process

telomere maintenance via telomerase

peptidyl-serine phosphorylation

negative regulation of ubiquitin-protein ligase activity

negative regulation of ligase activity

cranial nerve development

embryonic skeletal joint development

negative regulation of protein modification process

**Nominal P value**

0.85

0.85

0.85

0.85

0.85

0.85

0.85

0.85

0.85

0.85

0.85

0.85

0.85

0.85

0.85

0.85

0.85

0.85

0.85

0.85

0.85

0.85

0.85

0.85

0.85

0.85

0.85

0.85

0.85

0.85

0.85

0.85

0.85

0.85

0.85

0.85

0.85

0.85

0.85

0.85

0.85

0.85

0.85

0.85

0.86

0.86

0.86

0.86

0.86

| Original gene set ID                                           | Original gene set description                                                        | Nominal P value |
|----------------------------------------------------------------|--------------------------------------------------------------------------------------|-----------------|
| GO:0003382                                                     | epithelial cell morphogenesis                                                        | 0.86            |
| GO:0008608                                                     | attachment of spindle microtubules to kinetochore                                    | 0.86            |
| GO:0042354                                                     | L-fucose metabolic process                                                           | 0.86            |
| ENSG00000133812                                                | SBF2 PPI subnetwork                                                                  | 0.86            |
| ENSG00000124507                                                | PACSIN1 PPI subnetwork                                                               | 0.86            |
| MP:0004738                                                     | abnormal brainstem auditory evoked potentia                                          | 0.86            |
| REACTOME_PROSTACYCLIN_SIGNALLING_THROUGH_PROSTACYCLIN_RECEPTOR | REACTOME_PROSTACYCLIN_SIGNALLING_THROUGH_PROSTACYCLIN_RECEPTOR                       | 0.86            |
| ENSG00000143079                                                | CTTNBP2NL PPI subnetwork                                                             | 0.86            |
| GO:0006887                                                     | exocytosis                                                                           | 0.86            |
| ENSG00000152056                                                | AP1S3 PPI subnetwork                                                                 | 0.86            |
| REACTOME_CAM_PATHWAY                                           | REACTOME_CAM_PATHWAY                                                                 | 0.86            |
| REACTOME_CALMODULIN_INDUCED_EVENTS                             | REACTOME_CALMODULIN_INDUCED_EVENTS                                                   | 0.86            |
| GO:0000781                                                     | chromosome, telomeric region                                                         | 0.86            |
| REACTOME_AMINE_LIGAND_BINDING_RECEPTORS                        | REACTOME_AMINE_LIGAND_BINDING_RECEPTORS                                              | 0.86            |
| ENSG00000107371                                                | EXOSC3 PPI subnetwork                                                                | 0.86            |
| REACTOME_SIGNALING_BY_ROBO_RECEPTOR                            | REACTOME_SIGNALING_BY_ROBO_RECEPTOR                                                  | 0.86            |
| ENSG00000188986                                                | COBRA1 PPI subnetwork                                                                | 0.86            |
| REACTOME_ADHERENS_JUNCTIONS_INTERACTIONS                       | REACTOME_ADHERENS_JUNCTIONS_INTERACTIONS                                             | 0.86            |
| ENSG00000122566                                                | HNRNPA2B1 PPI subnetwork                                                             | 0.86            |
| MP:0000359                                                     | abnormal mast cell morphology                                                        | 0.86            |
| MP:0004722                                                     | abnormal platelet dense granule number                                               | 0.86            |
| ENSG00000188342                                                | GTF2F2 PPI subnetwork                                                                | 0.86            |
| GO:0001774                                                     | microglial cell activation                                                           | 0.86            |
| ENSG00000127920                                                | GNG11 PPI subnetwork                                                                 | 0.86            |
| ENSG00000112079                                                | STK38 PPI subnetwork                                                                 | 0.86            |
| GO:0009953                                                     | dorsal/ventral pattern formation                                                     | 0.86            |
| GO:0031032                                                     | actomyosin structure organization                                                    | 0.86            |
| GO:0050912                                                     | detection of chemical stimulus involved in sensory perception of taste               | 0.86            |
| ENSG00000132383                                                | RPA1 PPI subnetwork                                                                  | 0.86            |
| ENSG00000086102                                                | NFX1 PPI subnetwork                                                                  | 0.86            |
| ENSG00000182185                                                | RAD51B PPI subnetwork                                                                | 0.86            |
| ENSG00000183856                                                | IQGAP3 PPI subnetwork                                                                | 0.86            |
| GO:0048483                                                     | autonomic nervous system development                                                 | 0.86            |
| GO:0023021                                                     | termination of signal transduction                                                   | 0.86            |
| ENSG00000169813                                                | HNRNPF PPI subnetwork                                                                | 0.86            |
| ENSG00000100503                                                | NIN PPI subnetwork                                                                   | 0.86            |
| ENSG00000159377                                                | PSMB4 PPI subnetwork                                                                 | 0.86            |
| GO:0016702                                                     | oxidoreductase activity, acting on single donors with incorporation of molecular oxy | 0.86            |
| GO:0009582                                                     | detection of abiotic stimulus                                                        | 0.86            |
| MP:0009760                                                     | abnormal mitotic spindle morphology                                                  | 0.86            |
| MP:0004568                                                     | fusion of glossopharyngeal and vagus nerve                                           | 0.86            |
| MP:0008148                                                     | abnormal rib-sternum attachment                                                      | 0.86            |
| ENSG00000160199                                                | PKNOX1 PPI subnetwork                                                                | 0.86            |
| MP:0004970                                                     | kidney atrophy                                                                       | 0.86            |
| ENSG00000077063                                                | CTTNBP2 PPI subnetwork                                                               | 0.86            |
| ENSG00000124193                                                | SRSF6 PPI subnetwork                                                                 | 0.86            |
| MP:0004163                                                     | abnormal adenohypophysis morphology                                                  | 0.86            |
| GO:0034622                                                     | cellular macromolecular complex assembly                                             | 0.86            |
| ENSG00000145321                                                | GC PPI subnetwork                                                                    | 0.86            |

| Original gene set ID                                             | Original gene set description                                       | Nominal P value |
|------------------------------------------------------------------|---------------------------------------------------------------------|-----------------|
| REACTOME_G_ALPHA_I_SIGNALLING_EVENTS                             | REACTOME_G_ALPHA_I_SIGNALLING_EVENTS                                | 0.86            |
| ENSG00000175550                                                  | DRAP1 PPI subnetwork                                                | 0.86            |
| MP:0002115                                                       | abnormal limb bone morphology                                       | 0.86            |
| GO:0044242                                                       | cellular lipid catabolic process                                    | 0.86            |
| ENSG00000176102                                                  | CSTF3 PPI subnetwork                                                | 0.86            |
| GO:0016073                                                       | snRNA metabolic process                                             | 0.86            |
| GO:0004065                                                       | arylsulfatase activity                                              | 0.86            |
| REACTOME_MRNA_SPLICING                                           | REACTOME_MRNA_SPLICING                                              | 0.86            |
| REACTOME_MRNA_SPLICING_: _MAJOR_PATHWAY                          | REACTOME_MRNA_SPLICING_: _MAJOR_PATHWAY                             | 0.86            |
| ENSG00000185291                                                  | IL3RA PPI subnetwork                                                | 0.86            |
| GO:0050908                                                       | detection of light stimulus involved in visual perceptior           | 0.86            |
| GO:0050962                                                       | detection of light stimulus involved in sensory perceptior          | 0.86            |
| GO:0006200                                                       | ATP catabolic process                                               | 0.86            |
| MP:0001906                                                       | increased dopamine level                                            | 0.86            |
| GO:0032228                                                       | regulation of synaptic transmission, GABAergic                      | 0.86            |
| ENSG00000156304                                                  | SCAF4 PPI subnetwork                                                | 0.86            |
| ENSG00000114554                                                  | PLXNA1 PPI subnetwork                                               | 0.86            |
| ENSG00000132561                                                  | MATN2 PPI subnetwork                                                | 0.86            |
| ENSG00000100632                                                  | ERH PPI subnetwork                                                  | 0.86            |
| GO:0050660                                                       | flavin adenine dinucleotide binding                                 | 0.86            |
| GO:0009855                                                       | determination of bilateral symmetry                                 | 0.86            |
| GO:0045211                                                       | postsynaptic membrane                                               | 0.86            |
| GO:0019941                                                       | modification-dependent protein catabolic process                    | 0.86            |
| ENSG00000137767                                                  | SQRDL PPI subnetwork                                                | 0.86            |
| GO:0048706                                                       | embryonic skeletal system development                               | 0.86            |
| GO:0031201                                                       | SNARE complex                                                       | 0.86            |
| GO:0030258                                                       | lipid modification                                                  | 0.86            |
| GO:0030170                                                       | pyridoxal phosphate binding                                         | 0.86            |
| GO:0070279                                                       | vitamin B6 binding                                                  | 0.86            |
| ENSG00000139433                                                  | GLTP PPI subnetwork                                                 | 0.86            |
| ENSG00000063601                                                  | MTMR1 PPI subnetwork                                                | 0.86            |
| ENSG00000148773                                                  | MKI67 PPI subnetwork                                                | 0.86            |
| REACTOME_SYNTHESIS_OF_BILE_ACIDS_AND_BILE_SALTS_VIA_7ALPHA:HYDRO | REACTOME_SYNTHESIS_OF_BILE_ACIDS_AND_BILE_SALTS_VIA_7ALPHA:HYDROXYC | 0.86            |
| MP:0001883                                                       | mammary adenocarcinoma                                              | 0.86            |
| ENSG00000135744                                                  | AGT PPI subnetwork                                                  | 0.86            |
| MP:0004936                                                       | impaired branching involved in ureteric bud morphogenesis           | 0.86            |
| ENSG00000162385                                                  | MAGOH PPI subnetwork                                                | 0.86            |
| MP:0004835                                                       | abnormal miniature endplate potential                               | 0.86            |
| GO:0031398                                                       | positive regulation of protein ubiquitinatio                        | 0.86            |
| ENSG00000127527                                                  | EPS15L1 PPI subnetwork                                              | 0.86            |
| ENSG00000103507                                                  | BCKDK PPI subnetwork                                                | 0.86            |
| GO:0006071                                                       | glycerol metabolic process                                          | 0.86            |
| KEGG_LONG_TERM_POTENTIATION                                      | KEGG_LONG_TERM_POTENTIATION                                         | 0.86            |
| MP:0001970                                                       | abnormal pain threshold                                             | 0.86            |
| GO:0007420                                                       | brain development                                                   | 0.86            |
| ENSG00000116852                                                  | KIF21B PPI subnetwork                                               | 0.86            |
| GO:0017016                                                       | Ras GTPase binding                                                  | 0.87            |
| GO:0042594                                                       | response to starvation                                              | 0.87            |
| ENSG00000071794                                                  | HLTF PPI subnetwork                                                 | 0.87            |

| Original gene set ID                                                   | Original gene set description                                          | Nominal P value |
|------------------------------------------------------------------------|------------------------------------------------------------------------|-----------------|
| MP:0002920                                                             | decreased paired-pulse facilitation                                    | 0.87            |
| MP:0008272                                                             | abnormal endochondral bone ossification                                | 0.87            |
| MP:0002066                                                             | abnormal motor capabilities/coordination/movement                      | 0.87            |
| MP:0009133                                                             | decreased white fat cell size                                          | 0.87            |
| ENSG00000120254                                                        | MTHFD1L PPI subnetwork                                                 | 0.87            |
| GO:0005328                                                             | neurotransmitter:sodium symporter activity                             | 0.87            |
| GO:0033108                                                             | mitochondrial respiratory chain complex assembly                       | 0.87            |
| ENSG00000206503                                                        | HLA-A PPI subnetwork                                                   | 0.87            |
| ENSG00000013583                                                        | HEBP1 PPI subnetwork                                                   | 0.87            |
| MP:0005171                                                             | absent coat pigmentation                                               | 0.87            |
| ENSG00000170310                                                        | STX8 PPI subnetwork                                                    | 0.87            |
| REACTOME_CLATHRIN_DERIVED_VESICLE_BUDDING                              | REACTOME_CLATHRIN_DERIVED_VESICLE_BUDDING                              | 0.87            |
| REACTOME_TRANS:GOLGI_NETWORK_VESICLE_BUDDING                           | REACTOME_TRANS:GOLGI_NETWORK_VESICLE_BUDDING                           | 0.87            |
| GO:0016790                                                             | thiolester hydrolase activity                                          | 0.87            |
| ENSG00000151923                                                        | TIAL1 PPI subnetwork                                                   | 0.87            |
| MP:0005193                                                             | abnormal anterior eye segment morphology                               | 0.87            |
| ENSG00000137259                                                        | HIST1H2AB PPI subnetwork                                               | 0.87            |
| ENSG00000168274                                                        | HIST1H2AE PPI subnetwork                                               | 0.87            |
| REACTOME_NEUROTRANSMITTER_RECEPTOR_BINDING_AND_DOWNSTREAM_TRANSDUCTION | REACTOME_NEUROTRANSMITTER_RECEPTOR_BINDING_AND_DOWNSTREAM_TRANSDUCTION | 0.87            |
| GO:0050803                                                             | regulation of synapse structure and activity                           | 0.87            |
| ENSG00000163159                                                        | VPS72 PPI subnetwork                                                   | 0.87            |
| ENSG00000111245                                                        | MYL2 PPI subnetwork                                                    | 0.87            |
| ENSG00000155130                                                        | MARCKS PPI subnetwork                                                  | 0.87            |
| GO:0021953                                                             | central nervous system neuron differentiation                          | 0.87            |
| GO:0006213                                                             | pyrimidine nucleoside metabolic process                                | 0.87            |
| ENSG00000125354                                                        | SEPT6 PPI subnetwork                                                   | 0.87            |
| GO:0043632                                                             | modification-dependent macromolecule catabolic process                 | 0.87            |
| ENSG00000090060                                                        | PAPOLA PPI subnetwork                                                  | 0.87            |
| REACTOME_ADP_SIGNALLING_THROUGH_P2Y_PURINOCEPTOR_12                    | REACTOME_ADP_SIGNALLING_THROUGH_P2Y_PURINOCEPTOR_12                    | 0.87            |
| MP:0002633                                                             | persistent truncus arteriosus                                          | 0.87            |
| ENSG00000134690                                                        | CDCA8 PPI subnetwork                                                   | 0.87            |
| ENSG00000116329                                                        | OPRD1 PPI subnetwork                                                   | 0.87            |
| GO:0051028                                                             | mRNA transport                                                         | 0.87            |
| MP:0002332                                                             | abnormal exercise endurance                                            | 0.87            |
| GO:0019787                                                             | small conjugating protein ligase activity                              | 0.87            |
| GO:0051966                                                             | regulation of synaptic transmission, glutamatergic                     | 0.87            |
| ENSG00000167977                                                        | KCTD5 PPI subnetwork                                                   | 0.87            |
| ENSG00000168298                                                        | HIST1H1E PPI subnetwork                                                | 0.87            |
| ENSG00000173636                                                        | ENSG00000173636 PPI subnetwork                                         | 0.87            |
| ENSG00000166477                                                        | LEO1 PPI subnetwork                                                    | 0.87            |
| ENSG00000069424                                                        | KCNAB2 PPI subnetwork                                                  | 0.87            |
| ENSG00000085365                                                        | ENSG00000085365 PPI subnetwork                                         | 0.87            |
| MP:0010107                                                             | abnormal renal reabsorption                                            | 0.87            |
| ENSG00000089053                                                        | ANAPC5 PPI subnetwork                                                  | 0.87            |
| MP:0005445                                                             | abnormal neurotransmitter secretion                                    | 0.87            |
| GO:0019363                                                             | pyridine nucleotide biosynthetic process                               | 0.87            |
| GO:0072525                                                             | pyridine-containing compound biosynthetic process                      | 0.87            |
| GO:0009064                                                             | glutamine family amino acid metabolic process                          | 0.87            |
| GO:0007190                                                             | activation of adenylate cyclase activity                               | 0.87            |



| Original gene set ID                            | Original gene set description                                                  | Nominal P value |
|-------------------------------------------------|--------------------------------------------------------------------------------|-----------------|
| ENSG00000165494                                 | PCF11 PPI subnetwork                                                           | 0.87            |
| ENSG00000083857                                 | FAT1 PPI subnetwork                                                            | 0.87            |
| ENSG00000070961                                 | ATP2B1 PPI subnetwork                                                          | 0.87            |
| ENSG00000138668                                 | HNRNPD PPI subnetwork                                                          | 0.87            |
| ENSG00000068878                                 | PSME4 PPI subnetwork                                                           | 0.87            |
| MP:0003864                                      | abnormal midbrain development                                                  | 0.87            |
| MP:0005191                                      | head tilt                                                                      | 0.87            |
| MP:0000189                                      | hypoglycemia                                                                   | 0.87            |
| ENSG00000171497                                 | PPID PPI subnetwork                                                            | 0.87            |
| ENSG00000125266                                 | EFNB2 PPI subnetwork                                                           | 0.87            |
| GO:0070403                                      | NAD+ binding                                                                   | 0.87            |
| ENSG00000149532                                 | CPSF7 PPI subnetwork                                                           | 0.87            |
| GO:0021527                                      | spinal cord association neuron differentiator                                  | 0.87            |
| GO:0032813                                      | tumor necrosis factor receptor superfamily binding                             | 0.88            |
| ENSG00000174851                                 | YIF1A PPI subnetwork                                                           | 0.88            |
| GO:0060487                                      | lung epithelial cell differentiation                                           | 0.88            |
| ENSG00000141503                                 | MINK1 PPI subnetwork                                                           | 0.88            |
| ENSG00000080603                                 | SRCAP PPI subnetwork                                                           | 0.88            |
| ENSG00000099622                                 | CIRBP PPI subnetwork                                                           | 0.88            |
| GO:0051213                                      | dioxygenase activity                                                           | 0.88            |
| REACTOME_REGULATION_OF_INSULIN_SECRETION_BY_GLU | REACTOME_REGULATION_OF_INSULIN_SECRETION_BY_GLU                                | 0.88            |
| ENSG00000105011                                 | ASF1B PPI subnetwork                                                           | 0.88            |
| MP:0004819                                      | decreased skeletal muscle mass                                                 | 0.88            |
| REACTOME_AMYLOIDS                               | REACTOME_AMYLOIDS                                                              | 0.88            |
| MP:0005075                                      | abnormal melanosome morphology                                                 | 0.88            |
| KEGG_TRYPTOPHAN_METABOLISM                      | KEGG_TRYPTOPHAN_METABOLISM                                                     | 0.88            |
| ENSG00000031691                                 | CENPQ PPI subnetwork                                                           | 0.88            |
| GO:2000516                                      | positive regulation of CD4-positive, alpha-beta T cell activator               | 0.88            |
| GO:0043372                                      | positive regulation of CD4-positive, alpha-beta T cell differentiator          | 0.88            |
| ENSG00000120334                                 | CENPL PPI subnetwork                                                           | 0.88            |
| ENSG00000116095                                 | PLEKHA3 PPI subnetwork                                                         | 0.88            |
| GO:0045762                                      | positive regulation of adenylate cyclase activity                              | 0.88            |
| GO:0031281                                      | positive regulation of cyclase activity                                        | 0.88            |
| ENSG00000089685                                 | BIRC5 PPI subnetwork                                                           | 0.88            |
| GO:0021781                                      | glial cell fate commitment                                                     | 0.88            |
| ENSG00000120699                                 | EXOSC8 PPI subnetwork                                                          | 0.88            |
| ENSG00000103363                                 | TCEB2 PPI subnetwork                                                           | 0.88            |
| MP:0010984                                      | abnormal metanephric mesenchyme morphology                                     | 0.88            |
| ENSG00000169213                                 | RAB3B PPI subnetwork                                                           | 0.88            |
| ENSG00000179899                                 | ENSG00000179899 PPI subnetwork                                                 | 0.88            |
| ENSG00000196531                                 | NACA PPI subnetwork                                                            | 0.88            |
| GO:0072080                                      | nephron tubule development                                                     | 0.88            |
| MP:0004066                                      | abnormal primitive node morphology                                             | 0.88            |
| GO:0051439                                      | regulation of ubiquitin-protein ligase activity involved in mitotic cell cycle | 0.88            |
| ENSG00000148835                                 | TAF5 PPI subnetwork                                                            | 0.88            |
| ENSG00000095585                                 | BLNK PPI subnetwork                                                            | 0.88            |
| GO:0001838                                      | embryonic epithelial tube formation                                            | 0.88            |
| ENSG00000184408                                 | KCND2 PPI subnetwork                                                           | 0.88            |
| ENSG00000171793                                 | CTPS PPI subnetwork                                                            | 0.88            |

| Original gene set ID                                             | Original gene set description                                                | Nominal P value |
|------------------------------------------------------------------|------------------------------------------------------------------------------|-----------------|
| ENSG00000197905                                                  | TEAD4 PPI subnetwork                                                         | 0.88            |
| ENSG00000140379                                                  | BCL2A1 PPI subnetwork                                                        | 0.88            |
| MP:0002058                                                       | neonatal lethality                                                           | 0.88            |
| GO:0032934                                                       | sterol binding                                                               | 0.88            |
| MP:0005157                                                       | holoprosencephaly                                                            | 0.88            |
| GO:0048002                                                       | antigen processing and presentation of peptide antigen                       | 0.88            |
| GO:0051058                                                       | negative regulation of small GTPase mediated signal transduction             | 0.88            |
| MP:0004599                                                       | abnormal vertebral arch morphology                                           | 0.88            |
| GO:0051349                                                       | positive regulation of lyase activity                                        | 0.88            |
| GO:0031145                                                       | anaphase-promoting complex-dependent proteasomal ubiquitin-dependent protein | 0.88            |
| GO:0007223                                                       | Wnt receptor signaling pathway, calcium modulating pathway                   | 0.88            |
| GO:0007218                                                       | neuropeptide signaling pathway                                               | 0.88            |
| GO:0032835                                                       | glomerulus development                                                       | 0.88            |
| GO:0000236                                                       | mitotic prometaphase                                                         | 0.88            |
| REACTOME_AMINO_ACID_SYNTHESIS_AND_INTERCONVERSION_TRANSAMINATION | REACTOME_AMINO_ACID_SYNTHESIS_AND_INTERCONVERSION_TRANSAMINATION             | 0.88            |
| GO:0035249                                                       | synaptic transmission, glutamatergic                                         | 0.88            |
| GO:0005753                                                       | mitochondrial proton-transporting ATP synthase complex                       | 0.88            |
| ENSG00000184575                                                  | XPOT PPI subnetwork                                                          | 0.88            |
| ENSG00000137947                                                  | GTF2B PPI subnetwork                                                         | 0.88            |
| GO:0010972                                                       | negative regulation of G2/M transition of mitotic cell cycle                 | 0.88            |
| ENSG00000110768                                                  | GTF2H1 PPI subnetwork                                                        | 0.88            |
| ENSG00000117153                                                  | KLHL12 PPI subnetwork                                                        | 0.88            |
| ENSG00000168002                                                  | POLR2G PPI subnetwork                                                        | 0.88            |
| ENSG00000138663                                                  | COPS4 PPI subnetwork                                                         | 0.88            |
| MP:0003120                                                       | abnormal tracheal cartilage morphology                                       | 0.88            |
| ENSG00000172660                                                  | TAF15 PPI subnetwork                                                         | 0.88            |
| ENSG00000119203                                                  | CPSF3 PPI subnetwork                                                         | 0.88            |
| ENSG00000164076                                                  | CAMKV PPI subnetwork                                                         | 0.88            |
| MP:0000783                                                       | abnormal forebrain morphology                                                | 0.88            |
| ENSG00000132334                                                  | PTPRE PPI subnetwork                                                         | 0.88            |
| MP:0002841                                                       | impaired skeletal muscle contractility                                       | 0.88            |
| ENSG00000132692                                                  | BCAN PPI subnetwork                                                          | 0.88            |
| ENSG00000095380                                                  | NANS PPI subnetwork                                                          | 0.88            |
| MP:0000270                                                       | abnormal heart tube morphology                                               | 0.88            |
| GO:0003009                                                       | skeletal muscle contraction                                                  | 0.88            |
| GO:0034614                                                       | cellular response to reactive oxygen species                                 | 0.88            |
| GO:0060590                                                       | ATPase regulator activity                                                    | 0.88            |
| REACTOME_MEMBRANE_TRAFFICKING                                    | REACTOME_MEMBRANE_TRAFFICKING                                                | 0.88            |
| ENSG00000102384                                                  | CENPI PPI subnetwork                                                         | 0.88            |
| GO:0032465                                                       | regulation of cytokinesis                                                    | 0.88            |
| GO:0006284                                                       | base-excision repair                                                         | 0.88            |
| ENSG00000137642                                                  | SORL1 PPI subnetwork                                                         | 0.88            |
| ENSG00000106100                                                  | NOD1 PPI subnetwork                                                          | 0.88            |
| GO:0045981                                                       | positive regulation of nucleotide metabolic process                          | 0.88            |
| ENSG00000197111                                                  | PCBP2 PPI subnetwork                                                         | 0.88            |
| ENSG00000177302                                                  | TOP3A PPI subnetwork                                                         | 0.88            |
| ENSG00000165934                                                  | CPSF2 PPI subnetwork                                                         | 0.88            |
| GO:0042088                                                       | T-helper 1 type immune response                                              | 0.88            |
| GO:0047496                                                       | vesicle transport along microtubule                                          | 0.88            |

| Original gene set ID | Original gene set description                                          | Nominal P value |
|----------------------|------------------------------------------------------------------------|-----------------|
| ENSG00000100554      | ATP6V1D PPI subnetwork                                                 | 0.88            |
| GO:0051539           | 4 iron, 4 sulfur cluster binding                                       | 0.88            |
| MP:0000966           | decreased sensory neuron number                                        | 0.88            |
| GO:0009409           | response to cold                                                       | 0.88            |
| ENSG00000137055      | PLAA PPI subnetwork                                                    | 0.88            |
| GO:0016567           | protein ubiquitination                                                 | 0.88            |
| GO:0016903           | oxidoreductase activity, acting on the aldehyde or oxo group of donor: | 0.88            |
| GO:0019674           | NAD metabolic process                                                  | 0.88            |
| ENSG00000206258      | TNXB PPI subnetwork                                                    | 0.88            |
| ENSG00000198692      | EIF1AY PPI subnetwork                                                  | 0.88            |
| ENSG00000197558      | ENSG00000197558 PPI subnetwork                                         | 0.88            |
| ENSG00000127388      | ENSG00000127388 PPI subnetwork                                         | 0.88            |
| ENSG00000161888      | SPC24 PPI subnetwork                                                   | 0.88            |
| ENSG00000181790      | BAI1 PPI subnetwork                                                    | 0.88            |
| ENSG00000166451      | CENPN PPI subnetwork                                                   | 0.88            |
| ENSG00000020922      | MRE11A PPI subnetwork                                                  | 0.89            |
| GO:0046641           | positive regulation of alpha-beta T cell proliferation                 | 0.89            |
| GO:0042391           | regulation of membrane potential                                       | 0.89            |
| GO:0017157           | regulation of exocytosis                                               | 0.89            |
| GO:0006405           | RNA export from nucleus                                                | 0.89            |
| ENSG00000100151      | PICK1 PPI subnetwork                                                   | 0.89            |
| GO:0032729           | positive regulation of interferon-gamma production                     | 0.89            |
| ENSG00000114812      | VIPR1 PPI subnetwork                                                   | 0.89            |
| GO:0006403           | RNA localization                                                       | 0.89            |
| GO:0030684           | preribosome                                                            | 0.89            |
| ENSG00000169976      | SF3B5 PPI subnetwork                                                   | 0.89            |
| ENSG00000105323      | HNRNPUL1 PPI subnetwork                                                | 0.89            |
| GO:0045624           | positive regulation of T-helper cell differentiation                   | 0.89            |
| ENSG00000127481      | UBR4 PPI subnetwork                                                    | 0.89            |
| MP:0001793           | altered susceptibility to infection                                    | 0.89            |
| ENSG00000129757      | CDKN1C PPI subnetwork                                                  | 0.89            |
| ENSG00000118194      | TNNT2 PPI subnetwork                                                   | 0.89            |
| GO:0021675           | nerve development                                                      | 0.89            |
| GO:0046356           | acetyl-CoA catabolic process                                           | 0.89            |
| GO:0048193           | Golgi vesicle transport                                                | 0.89            |
| GO:0044449           | contractile fiber part                                                 | 0.89            |
| ENSG00000113456      | RAD1 PPI subnetwork                                                    | 0.89            |
| ENSG00000157404      | KIT PPI subnetwork                                                     | 0.89            |
| GO:0030801           | positive regulation of cyclic nucleotide metabolic process             | 0.89            |
| MP:0000774           | decreased brain size                                                   | 0.89            |
| ENSG00000111275      | ALDH2 PPI subnetwork                                                   | 0.89            |
| ENSG00000146963      | LUC7L2 PPI subnetwork                                                  | 0.89            |
| MP:0000137           | abnormal vertebrae morphology                                          | 0.89            |
| ENSG00000204133      | ENSG00000204133 PPI subnetwork                                         | 0.89            |
| GO:0051313           | attachment of spindle microtubules to chromosome                       | 0.89            |
| MP:0009907           | decreased tongue size                                                  | 0.89            |
| GO:0005003           | ephrin receptor activity                                               | 0.89            |
| ENSG00000163527      | STT3B PPI subnetwork                                                   | 0.89            |
| GO:0051023           | regulation of immunoglobulin secretion                                 | 0.89            |



| Original gene set ID                                           | Original gene set description                                                      | Nominal P value |
|----------------------------------------------------------------|------------------------------------------------------------------------------------|-----------------|
| ENSG00000196747                                                | HIST1H2AI PPI subnetwork                                                           | 0.89            |
| ENSG00000196787                                                | HIST1H2AG PPI subnetwork                                                           | 0.89            |
| ENSG00000196866                                                | HIST1H2AD PPI subnetwork                                                           | 0.89            |
| ENSG00000184348                                                | HIST1H2AK PPI subnetwork                                                           | 0.89            |
| ENSG00000198374                                                | HIST1H2AL PPI subnetwork                                                           | 0.89            |
| ENSG00000198728                                                | LDB1 PPI subnetwork                                                                | 0.89            |
| GO:0000910                                                     | cytokinesis                                                                        | 0.89            |
| ENSG00000103496                                                | STX4 PPI subnetwork                                                                | 0.89            |
| REACTOME_PLATELET_CALCIIUM_HOMEOSTASIS                         | REACTOME_PLATELET_CALCIIUM_HOMEOSTASIS                                             | 0.89            |
| MP:0005478                                                     | decreased circulating thyroxine level                                              | 0.89            |
| MP:0003172                                                     | abnormal lysosome physiology                                                       | 0.89            |
| GO:0016620                                                     | oxidoreductase activity, acting on the aldehyde or oxo group of donors, NAD or NAC | 0.89            |
| ENSG00000184886                                                | PIGW PPI subnetwork                                                                | 0.89            |
| ENSG00000159251                                                | ACTC1 PPI subnetwork                                                               | 0.89            |
| ENSG00000169564                                                | PCBP1 PPI subnetwork                                                               | 0.89            |
| REACTOME_TRANSPORT_OF_MATURE_MRNA_DERIVED_FROM_AN_INTRON:CONT  | REACTOME_TRANSPORT_OF_MATURE_MRNA_DERIVED_FROM_AN_INTRON:CONT                      | 0.89            |
| GO:0050671                                                     | positive regulation of lymphocyte proliferation                                    | 0.89            |
| ENSG00000100162                                                | CENPM PPI subnetwork                                                               | 0.89            |
| ENSG00000198938                                                | MT-CO3 PPI subnetwork                                                              | 0.89            |
| GO:0008374                                                     | O-acyltransferase activity                                                         | 0.89            |
| MP:0000940                                                     | abnormal motor neuron innervation                                                  | 0.89            |
| GO:0046605                                                     | regulation of centrosome cycle                                                     | 0.89            |
| MP:0001422                                                     | abnormal drinking behavior                                                         | 0.89            |
| GO:0021889                                                     | olfactory bulb interneuron differentiator                                          | 0.89            |
| REACTOME_FORMATION_OF_THE_HIV:1_EARLY_ELONGATION_COMPLEX       | REACTOME_FORMATION_OF_THE_HIV:1_EARLY_ELONGATION_COMPLEX                           | 0.89            |
| REACTOME_FORMATION_OF_THE_EARLY_ELONGATION_COMPLEX             | REACTOME_FORMATION_OF_THE_EARLY_ELONGATION_COMPLEX                                 | 0.89            |
| ENSG00000156052                                                | GNAQ PPI subnetwork                                                                | 0.89            |
| GO:0030016                                                     | myofibril                                                                          | 0.89            |
| ENSG00000152253                                                | SPC25 PPI subnetwork                                                               | 0.89            |
| GO:0003156                                                     | regulation of organ formation                                                      | 0.89            |
| ENSG00000087250                                                | MT3 PPI subnetwork                                                                 | 0.89            |
| ENSG00000188312                                                | CENPP PPI subnetwork                                                               | 0.89            |
| GO:0060428                                                     | lung epithelium development                                                        | 0.89            |
| MP:0002231                                                     | abnormal primitive streak morphology                                               | 0.89            |
| ENSG00000165119                                                | HNRNPK PPI subnetwork                                                              | 0.89            |
| REACTOME_ENDOSOMAL_SORTING_COMPLEX_REQUIRED_FOR_TRANSPORT_ESCR | REACTOME_ENDOSOMAL_SORTING_COMPLEX_REQUIRED_FOR_TRANSPORT_ESCR                     | 0.89            |
| GO:0008542                                                     | visual learning                                                                    | 0.89            |
| ENSG00000114503                                                | NCBP2 PPI subnetwork                                                               | 0.89            |
| ENSG00000115163                                                | CENPA PPI subnetwork                                                               | 0.89            |
| MP:0003324                                                     | increased liver adenoma incidence                                                  | 0.89            |
| GO:0000149                                                     | SNARE binding                                                                      | 0.89            |
| REACTOME_CDC6_ASSOCIATION_WITH_THE_ORCORIGIN_COMPLEX           | REACTOME_CDC6_ASSOCIATION_WITH_THE_ORCORIGIN_COMPLEX                               | 0.89            |
| ENSG00000110955                                                | ATP5B PPI subnetwork                                                               | 0.89            |
| GO:0005891                                                     | voltage-gated calcium channel complex                                              | 0.89            |
| ENSG00000105669                                                | COPE PPI subnetwork                                                                | 0.89            |
| GO:0001936                                                     | regulation of endothelial cell proliferati                                         | 0.89            |
| KEGG_PEROXISOME                                                | KEGG_PEROXISOME                                                                    | 0.89            |
| ENSG00000013455                                                | ENSG00000013455 PPI subnetwork                                                     | 0.89            |
| GO:0050997                                                     | quaternary ammonium group binding                                                  | 0.89            |

| Original gene set ID                                           | Original gene set description                                             | Nominal P value |
|----------------------------------------------------------------|---------------------------------------------------------------------------|-----------------|
| MP:0004084                                                     | abnormal cardiac muscle relaxation                                        | 0.89            |
| ENSG00000155974                                                | GRIP1 PPI subnetwork                                                      | 0.89            |
| GO:0016331                                                     | morphogenesis of embryonic epithelium                                     | 0.89            |
| ENSG00000115953                                                | ENSG00000115953 PPI subnetwork                                            | 0.89            |
| MP:0005192                                                     | increased motor neuron number                                             | 0.89            |
| MP:0001286                                                     | abnormal eye development                                                  | 0.89            |
| MP:0005106                                                     | abnormal incus morphology                                                 | 0.89            |
| ENSG00000115252                                                | PDE1A PPI subnetwork                                                      | 0.89            |
| GO:0005834                                                     | heterotrimeric G-protein complex                                          | 0.89            |
| GO:0006000                                                     | fructose metabolic process                                                | 0.89            |
| MP:0003271                                                     | abnormal duodenum morphology                                              | 0.89            |
| GO:0045333                                                     | cellular respiration                                                      | 0.89            |
| ENSG00000136709                                                | WDR33 PPI subnetwork                                                      | 0.89            |
| KEGG_SNARE_INTERACTIONS_IN_VESICULAR_TRANSPORT                 | KEGG_SNARE_INTERACTIONS_IN_VESICULAR_TRANSPORT                            | 0.89            |
| GO:0006873                                                     | cellular ion homeostasis                                                  | 0.89            |
| GO:0002208                                                     | somatic diversification of immunoglobulins involved in immune response    | 0.89            |
| GO:0045190                                                     | isotype switching                                                         | 0.89            |
| GO:0002204                                                     | somatic recombination of immunoglobulin genes involved in immune response | 0.89            |
| GO:0021513                                                     | spinal cord dorsal/ventral patterning                                     | 0.89            |
| REACTOME_TRANSPORT_OF_MATURE_MRNAS_DERIVED_FROM_INTRONLESS     | REACTOME_TRANSPORT_OF_MATURE_MRNAS_DERIVED_FROM_INTRONLESS_TRA            | 0.89            |
| REACTOME_THROMBIN_SIGNALLING_THROUGH_PROTEINASE_ACTIVATED_RECE | REACTOME_THROMBIN_SIGNALLING_THROUGH_PROTEINASE_ACTIVATED_RECE            | 0.89            |
| KEGG_ARGININE_AND_PROLINE_METABOLISM                           | KEGG_ARGININE_AND_PROLINE_METABOLISM                                      | 0.9             |
| ENSG00000108828                                                | VAT1 PPI subnetwork                                                       | 0.9             |
| GO:0051082                                                     | unfolded protein binding                                                  | 0.9             |
| GO:0007215                                                     | glutamate receptor signaling pathway                                      | 0.9             |
| MP:0002766                                                     | situs inversus                                                            | 0.9             |
| GO:0050806                                                     | positive regulation of synaptic transmission                              | 0.9             |
| GO:0042288                                                     | MHC class I protein binding                                               | 0.9             |
| ENSG00000138674                                                | SEC31A PPI subnetwork                                                     | 0.9             |
| ENSG00000105379                                                | ETFB PPI subnetwork                                                       | 0.9             |
| ENSG00000187735                                                | TCEA1 PPI subnetwork                                                      | 0.9             |
| MP:0002696                                                     | decreased circulating glucagon level                                      | 0.9             |
| MP:0004566                                                     | myocardial fiber degeneration                                             | 0.9             |
| GO:0007200                                                     | phospholipase C-activating G-protein coupled receptor signaling pathway   | 0.9             |
| MP:0002279                                                     | abnormal diaphragm morphology                                             | 0.9             |
| GO:0032880                                                     | regulation of protein localization                                        | 0.9             |
| ENSG00000130066                                                | SAT1 PPI subnetwork                                                       | 0.9             |
| MP:0005317                                                     | increased triglyceride level                                              | 0.9             |
| GO:0022904                                                     | respiratory electron transport chain                                      | 0.9             |
| GO:0006308                                                     | DNA catabolic process                                                     | 0.9             |
| ENSG00000112526                                                | ENSG00000112526 PPI subnetwork                                            | 0.9             |
| ENSG00000204256                                                | BRD2 PPI subnetwork                                                       | 0.9             |
| ENSG00000215077                                                | BRD2 PPI subnetwork                                                       | 0.9             |
| ENSG00000126698                                                | DNAJC8 PPI subnetwork                                                     | 0.9             |
| ENSG00000002834                                                | LASP1 PPI subnetwork                                                      | 0.9             |
| GO:0045063                                                     | T-helper 1 cell differentiation                                           | 0.9             |
| ENSG00000169371                                                | SNUPN PPI subnetwork                                                      | 0.9             |
| GO:0048710                                                     | regulation of astrocyte differentiation                                   | 0.9             |
| GO:0060191                                                     | regulation of lipase activity                                             | 0.9             |



| <b>Original gene set ID</b>                         | <b>Original gene set description</b>                 | <b>Nominal P value</b> |
|-----------------------------------------------------|------------------------------------------------------|------------------------|
| GO:0010243                                          | response to organic nitrogen                         | 0.9                    |
| GO:0017085                                          | response to insecticide                              | 0.9                    |
| ENSG000000134109                                    | EDEM1 PPI subnetwork                                 | 0.9                    |
| GO:0046467                                          | membrane lipid biosynthetic process                  | 0.9                    |
| ENSG000000114573                                    | ATP6V1A PPI subnetwork                               | 0.9                    |
| GO:0072593                                          | reactive oxygen species metabolic process            | 0.9                    |
| KEGG_SULFUR_METABOLISM                              | KEGG_SULFUR_METABOLISM                               | 0.9                    |
| GO:0050881                                          | musculoskeletal movement                             | 0.9                    |
| GO:0050879                                          | multicellular organismal movement                    | 0.9                    |
| GO:0050953                                          | sensory perception of light stimulus                 | 0.9                    |
| ENSG000000169045                                    | HNRNPH1 PPI subnetwork                               | 0.9                    |
| ENSG000000096717                                    | SIRT1 PPI subnetwork                                 | 0.9                    |
| GO:0007601                                          | visual perception                                    | 0.9                    |
| GO:0005814                                          | centriole                                            | 0.9                    |
| ENSG000000090989                                    | EXOC1 PPI subnetwork                                 | 0.9                    |
| GO:0030163                                          | protein catabolic process                            | 0.9                    |
| ENSG000000181029                                    | TRAPPC5 PPI subnetwork                               | 0.9                    |
| GO:0032993                                          | protein-DNA complex                                  | 0.9                    |
| ENSG000000184983                                    | NDUFA6 PPI subnetwork                                | 0.9                    |
| ENSG000000185658                                    | BRWD1 PPI subnetwork                                 | 0.9                    |
| REACTOME_TRANSCRIPTION:COUPLED_NER_TC:NER           | REACTOME_TRANSCRIPTION:COUPLED_NER_TC:NER            | 0.9                    |
| KEGG_CITRATE_CYCLE_TCA_CYCLE                        | KEGG_CITRATE_CYCLE_TCA_CYCLE                         | 0.9                    |
| ENSG000000057468                                    | MSH4 PPI subnetwork                                  | 0.9                    |
| ENSG000000147443                                    | DOK2 PPI subnetwork                                  | 0.9                    |
| GO:0050690                                          | regulation of defense response to virus by virus     | 0.9                    |
| ENSG000000105656                                    | ELL PPI subnetwork                                   | 0.9                    |
| GO:0051983                                          | regulation of chromosome segregation                 | 0.9                    |
| GO:0034440                                          | lipid oxidation                                      | 0.9                    |
| ENSG000000157344                                    | ENSG000000157344 PPI subnetwork                      | 0.9                    |
| ENSG000000105289                                    | TJP3 PPI subnetwork                                  | 0.9                    |
| ENSG000000198648                                    | STK39 PPI subnetwork                                 | 0.9                    |
| ENSG000000028137                                    | TNFRSF1B PPI subnetwork                              | 0.9                    |
| GO:0015949                                          | nucleobase-containing small molecule interconversion | 0.9                    |
| REACTOME_G:PROTEIN_ACTIVATION                       | REACTOME_G:PROTEIN_ACTIVATION                        | 0.9                    |
| ENSG000000165023                                    | DIRAS2 PPI subnetwork                                | 0.9                    |
| ENSG000000092201                                    | SUPT16H PPI subnetwork                               | 0.9                    |
| GO:0051018                                          | protein kinase A binding                             | 0.9                    |
| MP:0003463                                          | abnormal single cell response                        | 0.9                    |
| ENSG000000128524                                    | ATP6V1F PPI subnetwork                               | 0.9                    |
| MP:0000841                                          | abnormal hindbrain morphology                        | 0.9                    |
| GO:0033013                                          | tetrapyrrole metabolic process                       | 0.9                    |
| GO:0006778                                          | porphyrin-containing compound metabolic process      | 0.9                    |
| KEGG_NUCLEOTIDE_EXCISION_REPAIR                     | KEGG_NUCLEOTIDE_EXCISION_REPAIR                      | 0.9                    |
| ENSG000000213619                                    | NDUFS3 PPI subnetwork                                | 0.91                   |
| KEGG_GLYCOSAMINOGLYCAN_BIOSYNTHESIS KERATAN_SULFATE | KEGG_GLYCOSAMINOGLYCAN_BIOSYNTHESIS KERATAN_SULFATE  | 0.91                   |
| GO:0048713                                          | regulation of oligodendrocyte differentiation        | 0.91                   |
| GO:0060425                                          | lung morphogenesis                                   | 0.91                   |
| GO:0015030                                          | Cajal body                                           | 0.91                   |
| ENSG000000138092                                    | CENPO PPI subnetwork                                 | 0.91                   |





| Original gene set ID                                           | Original gene set description                                                          | Nominal P value |
|----------------------------------------------------------------|----------------------------------------------------------------------------------------|-----------------|
| GO:0006613                                                     | cotranslational protein targeting to membrane                                          | 0.92            |
| ENSG00000126945                                                | HNRNPH2 PPI subnetwork                                                                 | 0.92            |
| ENSG00000171747                                                | LGALS4 PPI subnetwork                                                                  | 0.92            |
| GO:0002828                                                     | regulation of type 2 immune response                                                   | 0.92            |
| ENSG00000004487                                                | KDM1A PPI subnetwork                                                                   | 0.92            |
| ENSG00000158022                                                | TRIM63 PPI subnetwork                                                                  | 0.92            |
| REACTOME_ABORTIVE_ELONGATION_OF_HIV:1_TRANSCRIPT_IN_THE_ABSENC | REACTOME_ABORTIVE_ELONGATION_OF_HIV:1_TRANSCRIPT_IN_THE_ABSENCE_O                      | 0.92            |
| GO:0051436                                                     | negative regulation of ubiquitin-protein ligase activity involved in mitotic cell cycl | 0.92            |
| GO:0030317                                                     | sperm motility                                                                         | 0.92            |
| ENSG00000198824                                                | CHAMP1 PPI subnetwork                                                                  | 0.92            |
| GO:0048013                                                     | ephrin receptor signaling pathway                                                      | 0.92            |
| GO:0001706                                                     | endoderm formation                                                                     | 0.92            |
| ENSG00000100241                                                | SBF1 PPI subnetwork                                                                    | 0.92            |
| GO:0048708                                                     | astrocyte differentiation                                                              | 0.92            |
| ENSG00000184432                                                | COPB2 PPI subnetwork                                                                   | 0.92            |
| GO:0016594                                                     | glycine binding                                                                        | 0.92            |
| ENSG00000070182                                                | SPTB PPI subnetwork                                                                    | 0.92            |
| GO:0050657                                                     | nucleic acid transport                                                                 | 0.92            |
| GO:0051236                                                     | establishment of RNA localization                                                      | 0.92            |
| GO:0050658                                                     | RNA transport                                                                          | 0.92            |
| ENSG00000010818                                                | HIVEP2 PPI subnetwork                                                                  | 0.92            |
| GO:0071158                                                     | positive regulation of cell cycle arrest                                               | 0.92            |
| ENSG00000122705                                                | CLTA PPI subnetwork                                                                    | 0.92            |
| ENSG00000105258                                                | POLR2I PPI subnetwork                                                                  | 0.92            |
| GO:0042588                                                     | zymogen granule                                                                        | 0.92            |
| GO:0070665                                                     | positive regulation of leukocyte proliferation                                         | 0.92            |
| GO:0005932                                                     | microtubule basal body                                                                 | 0.92            |
| GO:0031594                                                     | neuromuscular junction                                                                 | 0.92            |
| GO:0016862                                                     | intramolecular oxidoreductase activity, interconverting keto- and enol-group:          | 0.92            |
| GO:0006370                                                     | mRNA capping                                                                           | 0.92            |
| ENSG00000132639                                                | SNAP25 PPI subnetwork                                                                  | 0.92            |
| GO:0030900                                                     | forebrain development                                                                  | 0.92            |
| GO:0070972                                                     | protein localization in endoplasmic reticulum                                          | 0.92            |
| ENSG00000115128                                                | ENSG00000115128 PPI subnetwork                                                         | 0.92            |
| GO:0060079                                                     | regulation of excitatory postsynaptic membrane potentia                                | 0.92            |
| GO:0070647                                                     | protein modification by small protein conjugation or remova                            | 0.92            |
| KEGG_VIBRIO_CHOLERAЕ_INFECTION                                 | KEGG_VIBRIO_CHOLERAЕ_INFECTION                                                         | 0.92            |
| GO:0016676                                                     | oxidoreductase activity, acting on a heme group of donors, oxygen as accepto           | 0.92            |
| GO:0015002                                                     | heme-copper terminal oxidase activity                                                  | 0.92            |
| GO:0004129                                                     | cytochrome-c oxidase activity                                                          | 0.92            |
| ENSG00000154710                                                | RABGEF1 PPI subnetwork                                                                 | 0.92            |
| GO:0044257                                                     | cellular protein catabolic process                                                     | 0.92            |
| GO:0016917                                                     | GABA receptor activity                                                                 | 0.92            |
| ENSG00000048828                                                | FAM120A PPI subnetwork                                                                 | 0.92            |
| ENSG00000166226                                                | CCT2 PPI subnetwork                                                                    | 0.92            |
| GO:0009264                                                     | deoxyribonucleotide catabolic process                                                  | 0.92            |
| GO:0030313                                                     | cell envelope                                                                          | 0.92            |
| GO:0044462                                                     | external encapsulating structure part                                                  | 0.92            |
| ENSG00000154723                                                | ATP5J PPI subnetwork                                                                   | 0.92            |

| Original gene set ID                                            | Original gene set description                                   | Nominal P value |
|-----------------------------------------------------------------|-----------------------------------------------------------------|-----------------|
| ENSG00000137825                                                 | ITPKA PPI subnetwork                                            | 0.92            |
| MP:0009838                                                      | abnormal sperm axoneme morphology                               | 0.92            |
| ENSG00000164402                                                 | SEPT8 PPI subnetwork                                            | 0.92            |
| GO:0002637                                                      | regulation of immunoglobulin production                         | 0.92            |
| GO:0031334                                                      | positive regulation of protein complex assembly                 | 0.92            |
| REACTOME_ACTIVATION_OF_KAINATE_RECEPTORS_UPON_Glutamate_BINDING | REACTOME_ACTIVATION_OF_KAINATE_RECEPTORS_UPON_Glutamate_BINDING | 0.92            |
| GO:0001759                                                      | organ induction                                                 | 0.92            |
| ENSG00000109519                                                 | GRPEL1 PPI subnetwork                                           | 0.92            |
| ENSG00000147099                                                 | HDAC8 PPI subnetwork                                            | 0.92            |
| ENSG00000100410                                                 | PHF5A PPI subnetwork                                            | 0.92            |
| ENSG00000160783                                                 | PMF1 PPI subnetwork                                             | 0.92            |
| ENSG00000142856                                                 | ITGB3BP PPI subnetwork                                          | 0.92            |
| GO:0072210                                                      | metanephric nephron development                                 | 0.92            |
| GO:0050433                                                      | regulation of catecholamine secretion                           | 0.92            |
| ENSG00000065150                                                 | IPO5 PPI subnetwork                                             | 0.92            |
| GO:0010959                                                      | regulation of metal ion transport                               | 0.92            |
| REACTOME_AMINE_COMPOUND_SLC_TRANSPORTERS                        | REACTOME_AMINE_COMPOUND_SLC_TRANSPORTERS                        | 0.92            |
| ENSG00000102109                                                 | PCSK1N PPI subnetwork                                           | 0.92            |
| ENSG00000122952                                                 | ZWINT PPI subnetwork                                            | 0.92            |
| GO:0043034                                                      | costamere                                                       | 0.92            |
| REACTOME_TRAFFICKING_OF_AMPA_RECEPTORS                          | REACTOME_TRAFFICKING_OF_AMPA_RECEPTORS                          | 0.92            |
| REACTOME_Glutamate_BINDING_ACTIVATION_OF_AMPA_RECEPTORS_AND_SYN | REACTOME_Glutamate_BINDING_ACTIVATION_OF_AMPA_RECEPTORS_AND_SYN | 0.92            |
| GO:0019395                                                      | fatty acid oxidation                                            | 0.92            |
| GO:0042436                                                      | indole-containing compound catabolic process                    | 0.92            |
| GO:0046218                                                      | indolalkylamine catabolic process                               | 0.92            |
| GO:0006569                                                      | tryptophan catabolic process                                    | 0.92            |
| ENSG00000188386                                                 | PPP3R2 PPI subnetwork                                           | 0.92            |
| MP:0004615                                                      | cervical vertebral transformation                               | 0.92            |
| ENSG00000121621                                                 | KIF18A PPI subnetwork                                           | 0.92            |
| ENSG00000119318                                                 | RAD23B PPI subnetwork                                           | 0.92            |
| ENSG00000115254                                                 | ENSG00000115254 PPI subnetwork                                  | 0.92            |
| ENSG00000167136                                                 | ENDOG PPI subnetwork                                            | 0.92            |
| GO:0016197                                                      | endosomal transport                                             | 0.92            |
| GO:0016469                                                      | proton-transporting two-sector ATPase complex                   | 0.92            |
| ENSG00000060558                                                 | GNA15 PPI subnetwork                                            | 0.92            |
| MP:0001905                                                      | abnormal dopamine level                                         | 0.92            |
| ENSG00000129473                                                 | BCL2L2 PPI subnetwork                                           | 0.92            |
| ENSG00000168496                                                 | FEN1 PPI subnetwork                                             | 0.92            |
| ENSG00000167083                                                 | GNGT2 PPI subnetwork                                            | 0.92            |
| REACTOME_Glucagon:TYPE_Ligand_Receptors                         | REACTOME_Glucagon:TYPE_Ligand_Receptors                         | 0.92            |
| ENSG00000118680                                                 | MYL12B PPI subnetwork                                           | 0.92            |
| GO:0046503                                                      | glycerolipid catabolic process                                  | 0.92            |
| ENSG00000124610                                                 | HIST1H1A PPI subnetwork                                         | 0.92            |
| REACTOME_INSULIN_RECEPTOR_RECYCLING                             | REACTOME_INSULIN_RECEPTOR_RECYCLING                             | 0.92            |
| GO:0006281                                                      | DNA repair                                                      | 0.92            |
| REACTOME_STRIATED_MUSCLE_CONTRACTION                            | REACTOME_STRIATED_MUSCLE_CONTRACTION                            | 0.92            |
| GO:0030148                                                      | sphingolipid biosynthetic process                               | 0.92            |
| GO:0016054                                                      | organic acid catabolic process                                  | 0.92            |
| GO:0046395                                                      | carboxylic acid catabolic process                               | 0.92            |



| Original gene set ID                                               | Original gene set description                                      | Nominal P value |
|--------------------------------------------------------------------|--------------------------------------------------------------------|-----------------|
| REACTOME_DARPP:32_EVENTS                                           | REACTOME_DARPP:32_EVENTS                                           | 0.92            |
| GO:0006521                                                         | regulation of cellular amino acid metabolic process                | 0.92            |
| MP:0004101                                                         | abnormal brain interneuron morphology                              | 0.93            |
| ENSG00000129990                                                    | SYT5 PPI subnetwork                                                | 0.93            |
| ENSG00000184702                                                    | SEPT5 PPI subnetwork                                               | 0.93            |
| ENSG00000183474                                                    | GTF2H2C PPI subnetwork                                             | 0.93            |
| ENSG00000124795                                                    | DEK PPI subnetwork                                                 | 0.93            |
| ENSG00000112290                                                    | WASF1 PPI subnetwork                                               | 0.93            |
| GO:0009583                                                         | detection of light stimulus                                        | 0.93            |
| GO:0072073                                                         | kidney epithelium development                                      | 0.93            |
| GO:0016236                                                         | macroautophagy                                                     | 0.93            |
| MP:0003672                                                         | abnormal ureter development                                        | 0.93            |
| ENSG00000159259                                                    | CHAF1B PPI subnetwork                                              | 0.93            |
| ENSG00000143368                                                    | SF3B4 PPI subnetwork                                               | 0.93            |
| GO:0006721                                                         | terpenoid metabolic process                                        | 0.93            |
| REACTOME_IRON_UPTAKE_AND_TRANSPORT                                 | REACTOME_IRON_UPTAKE_AND_TRANSPORT                                 | 0.93            |
| ENSG00000153207                                                    | AHCTF1 PPI subnetwork                                              | 0.93            |
| GO:0032446                                                         | protein modification by small protein conjugation                  | 0.93            |
| GO:0044447                                                         | axoneme part                                                       | 0.93            |
| GO:0007626                                                         | locomotory behavior                                                | 0.93            |
| GO:0042033                                                         | chemokine biosynthetic process                                     | 0.93            |
| GO:0005245                                                         | voltage-gated calcium channel activity                             | 0.93            |
| REACTOME_INHIBITION_OF_INSULIN_SECRETION_BY_ADRENALINENORADRENALIN | REACTOME_INHIBITION_OF_INSULIN_SECRETION_BY_ADRENALINENORADRENALIN | 0.93            |
| ENSG00000124172                                                    | ATP5E PPI subnetwork                                               | 0.93            |
| ENSG00000025800                                                    | KPNA6 PPI subnetwork                                               | 0.93            |
| REACTOME_TRYPTOPHAN_CATABOLISM                                     | REACTOME_TRYPTOPHAN_CATABOLISM                                     | 0.93            |
| ENSG00000184357                                                    | HIST1H1B PPI subnetwork                                            | 0.93            |
| GO:0050905                                                         | neuromuscular process                                              | 0.93            |
| ENSG00000138071                                                    | ACTR2 PPI subnetwork                                               | 0.93            |
| REACTOME_ENERGY_DEPENDENT_REGULATION_OF_MTOR_BY_LKB1:AMPK          | REACTOME_ENERGY_DEPENDENT_REGULATION_OF_MTOR_BY_LKB1:AMPK          | 0.93            |
| MP:0001898                                                         | abnormal long term depression                                      | 0.93            |
| KEGG_GLYOXYLATE_AND_DICARBOXYLATE_METABOLISM                       | KEGG_GLYOXYLATE_AND_DICARBOXYLATE_METABOLISM                       | 0.93            |
| GO:0006289                                                         | nucleotide-excision repair                                         | 0.93            |
| ENSG00000163636                                                    | PSMD6 PPI subnetwork                                               | 0.93            |
| ENSG00000168556                                                    | ING2 PPI subnetwork                                                | 0.93            |
| GO:0030594                                                         | neurotransmitter receptor activity                                 | 0.93            |
| GO:0000775                                                         | chromosome, centromeric region                                     | 0.93            |
| ENSG00000166337                                                    | TAF10 PPI subnetwork                                               | 0.93            |
| REACTOME_SYNTHESIS_AND_INTERCONVERSION_OF_NUCLEOTIDE_DI:_AND_T     | REACTOME_SYNTHESIS_AND_INTERCONVERSION_OF_NUCLEOTIDE_DI:_AND_TRIP  | 0.93            |
| GO:0007413                                                         | axonal fasciculation                                               | 0.93            |
| ENSG00000143850                                                    | PLEKHA6 PPI subnetwork                                             | 0.93            |
| REACTOME_INSULIN_SYNTHESIS_AND_PROCESSING                          | REACTOME_INSULIN_SYNTHESIS_AND_PROCESSING                          | 0.93            |
| GO:0032838                                                         | cell projection cytoplasm                                          | 0.93            |
| ENSG00000106588                                                    | PSMA2 PPI subnetwork                                               | 0.93            |
| MP:0000750                                                         | abnormal muscle regeneration                                       | 0.93            |
| ENSG00000198947                                                    | DMD PPI subnetwork                                                 | 0.93            |
| GO:0034453                                                         | microtubule anchoring                                              | 0.93            |
| GO:0042573                                                         | retinoic acid metabolic process                                    | 0.93            |
| ENSG00000133059                                                    | DSTYK PPI subnetwork                                               | 0.93            |

| <b>Original gene set ID</b>                          | <b>Original gene set description</b>                                                 | <b>Nominal P value</b> |
|------------------------------------------------------|--------------------------------------------------------------------------------------|------------------------|
| GO:0016829                                           | lyase activity                                                                       | 0.93                   |
| GO:0009055                                           | electron carrier activity                                                            | 0.93                   |
| GO:0009620                                           | response to fungus                                                                   | 0.93                   |
| MP:0002239                                           | abnormal nasal septum morphology                                                     | 0.93                   |
| GO:0004221                                           | ubiquitin thiolesterase activity                                                     | 0.93                   |
| GO:0010888                                           | negative regulation of lipid storage                                                 | 0.93                   |
| GO:0051287                                           | NAD binding                                                                          | 0.93                   |
| MP:0004452                                           | abnormal pterygoid process morphology                                                | 0.93                   |
| GO:0006120                                           | mitochondrial electron transport, NADH to ubiquinone                                 | 0.93                   |
| ENSG00000088832                                      | FKBP1A PPI subnetwork                                                                | 0.93                   |
| GO:0051298                                           | centrosome duplication                                                               | 0.93                   |
| REACTOME_ACTIVATION_OF_CA:PERMEABLE_KAINATE_RECEPTOR | REACTOME_ACTIVATION_OF_CA:PERMEABLE_KAINATE_RECEPTOR                                 | 0.93                   |
| REACTOME_IONOTROPIC_ACTIVITY_OF_KAINATE_RECEPTORS    | REACTOME_IONOTROPIC_ACTIVITY_OF_KAINATE_RECEPTORS                                    | 0.93                   |
| ENSG00000087263                                      | OGFOD1 PPI subnetwork                                                                | 0.93                   |
| ENSG00000100985                                      | MMP9 PPI subnetwork                                                                  | 0.93                   |
| REACTOME_METABOLISM_OF_AMINO_ACIDS_AND_DERIVATIVES   | REACTOME_METABOLISM_OF_AMINO_ACIDS_AND_DERIVATIVES                                   | 0.93                   |
| ENSG00000103423                                      | DNAJA3 PPI subnetwork                                                                | 0.93                   |
| ENSG00000172977                                      | KAT5 PPI subnetwork                                                                  | 0.93                   |
| REACTOME_CELL_CYCLE_CHECKPOINTS                      | REACTOME_CELL_CYCLE_CHECKPOINTS                                                      | 0.93                   |
| ENSG00000105726                                      | ATP13A1 PPI subnetwork                                                               | 0.93                   |
| ENSG00000089818                                      | NECAP1 PPI subnetwork                                                                | 0.93                   |
| GO:0006081                                           | cellular aldehyde metabolic process                                                  | 0.94                   |
| ENSG00000165868                                      | HSPA12A PPI subnetwork                                                               | 0.94                   |
| GO:0072283                                           | metanephric renal vesicle morphogenesis                                              | 0.94                   |
| MP:0003054                                           | spina bifida                                                                         | 0.94                   |
| ENSG00000105514                                      | RAB3D PPI subnetwork                                                                 | 0.94                   |
| GO:0072170                                           | metanephric tubule development                                                       | 0.94                   |
| GO:0016706                                           | oxidoreductase activity, acting on paired donors, with incorporation or reduction of | 0.94                   |
| ENSG00000137575                                      | SDCBP PPI subnetwork                                                                 | 0.94                   |
| ENSG00000185973                                      | TMLHE PPI subnetwork                                                                 | 0.94                   |
| GO:0009063                                           | cellular amino acid catabolic process                                                | 0.94                   |
| MP:0003137                                           | abnormal impulse conducting system conduction                                        | 0.94                   |
| ENSG00000173366                                      | ENSG00000173366 PPI subnetwork                                                       | 0.94                   |
| GO:0030878                                           | thyroid gland development                                                            | 0.94                   |
| GO:0010043                                           | response to zinc ion                                                                 | 0.94                   |
| GO:0006568                                           | tryptophan metabolic process                                                         | 0.94                   |
| GO:0016796                                           | exonuclease activity, active with either ribo- or deoxyribonucleic acids and produc  | 0.94                   |
| GO:0007611                                           | learning or memory                                                                   | 0.94                   |
| KEGG_RNA_DEGRADATION                                 | KEGG_RNA_DEGRADATION                                                                 | 0.94                   |
| GO:0000783                                           | nuclear telomere cap complex                                                         | 0.94                   |
| GO:0000782                                           | telomere cap complex                                                                 | 0.94                   |
| ENSG00000100167                                      | SEPT3 PPI subnetwork                                                                 | 0.94                   |
| GO:0016574                                           | histone ubiquitination                                                               | 0.94                   |
| MP:0002090                                           | abnormal vision                                                                      | 0.94                   |
| ENSG00000006740                                      | ARHGAP44 PPI subnetwork                                                              | 0.94                   |
| ENSG00000143106                                      | PSMA5 PPI subnetwork                                                                 | 0.94                   |
| ENSG00000101654                                      | RNMT PPI subnetwork                                                                  | 0.94                   |
| ENSG00000125814                                      | NAPB PPI subnetwork                                                                  | 0.94                   |
| ENSG00000185104                                      | FAF1 PPI subnetwork                                                                  | 0.94                   |

| Original gene set ID                          | Original gene set description                      | Nominal P value |
|-----------------------------------------------|----------------------------------------------------|-----------------|
| GO:0031023                                    | microtubule organizing center organization         | 0.94            |
| GO:0030968                                    | endoplasmic reticulum unfolded protein response    | 0.94            |
| GO:0034620                                    | cellular response to unfolded protein              | 0.94            |
| ENSG00000120265                               | PCMT1 PPI subnetwork                               | 0.94            |
| ENSG00000169217                               | CD2BP2 PPI subnetwork                              | 0.94            |
| GO:0055093                                    | response to hyperoxia                              | 0.94            |
| ENSG00000197299                               | BLM PPI subnetwork                                 | 0.94            |
| REACTOME_METABOLISM_OF_PORPHYRINS             | REACTOME_METABOLISM_OF_PORPHYRINS                  | 0.94            |
| GO:0001655                                    | urogenital system development                      | 0.94            |
| ENSG00000107554                               | DNMBP PPI subnetwork                               | 0.94            |
| GO:0021954                                    | central nervous system neuron development          | 0.94            |
| ENSG00000125870                               | SNRPB2 PPI subnetwork                              | 0.94            |
| ENSG00000105509                               | HAS1 PPI subnetwork                                | 0.94            |
| REACTOME_HIV_INFECTION                        | REACTOME_HIV_INFECTION                             | 0.94            |
| REACTOME_REGULATION_OF_AMPK_ACTIVITY_VIA_LKB1 | REACTOME_REGULATION_OF_AMPK_ACTIVITY_VIA_LKB1      | 0.94            |
| REACTOME_ACTIVATION_OF_GENES_BY_ATF4          | REACTOME_ACTIVATION_OF_GENES_BY_ATF4               | 0.94            |
| MP:0000830                                    | abnormal diencephalon morphology                   | 0.94            |
| ENSG00000181555                               | SETD2 PPI subnetwork                               | 0.94            |
| GO:0048168                                    | regulation of neuronal synaptic plasticity         | 0.94            |
| ENSG00000066248                               | NGEF PPI subnetwork                                | 0.94            |
| GO:0048557                                    | embryonic digestive tract morphogenesis            | 0.94            |
| ENSG00000172732                               | MUS81 PPI subnetwork                               | 0.94            |
| ENSG00000072864                               | NDE1 PPI subnetwork                                | 0.94            |
| GO:0031646                                    | positive regulation of neurological system proces: | 0.94            |
| ENSG00000188486                               | H2AFX PPI subnetwork                               | 0.94            |
| GO:0009310                                    | amine catabolic process                            | 0.94            |
| GO:0008066                                    | glutamate receptor activity                        | 0.94            |
| GO:0001822                                    | kidney development                                 | 0.94            |
| ENSG00000065833                               | ME1 PPI subnetwork                                 | 0.94            |
| ENSG00000164687                               | FABP5 PPI subnetwork                               | 0.94            |
| GO:0051297                                    | centrosome organization                            | 0.94            |
| MP:0005533                                    | increased body temperature                         | 0.94            |
| ENSG00000161057                               | PSMC2 PPI subnetwork                               | 0.94            |
| ENSG00000115808                               | STRN PPI subnetwork                                | 0.94            |
| GO:0060193                                    | positive regulation of lipase activity             | 0.94            |
| ENSG00000205726                               | ITSN1 PPI subnetwork                               | 0.94            |
| KEGG_NEUROACTIVE_LIGAND_RECEPTOR_INTERACTION  | KEGG_NEUROACTIVE_LIGAND_RECEPTOR_INTERACTION       | 0.94            |
| GO:0045295                                    | gamma-catenin binding                              | 0.94            |
| ENSG00000115760                               | BIRC6 PPI subnetwork                               | 0.94            |
| MP:0003384                                    | abnormal ventral body wall morphology              | 0.94            |
| REACTOME_PACKAGING_OF_TELOMERE_ENDS           | REACTOME_PACKAGING_OF_TELOMERE_ENDS                | 0.94            |
| ENSG00000183091                               | NEB PPI subnetwork                                 | 0.94            |
| GO:0072001                                    | renal system development                           | 0.94            |
| ENSG00000107611                               | CUBN PPI subnetwork                                | 0.94            |
| MP:0008789                                    | abnormal olfactory epithelium morphology           | 0.94            |
| GO:0055072                                    | iron ion homeostasis                               | 0.94            |
| MP:0001787                                    | pericardial edema                                  | 0.94            |
| MP:0001777                                    | abnormal body temperature homeostasis              | 0.94            |
| MP:0003063                                    | increased coping response                          | 0.94            |



| Original gene set ID                                           | Original gene set description                                    | Nominal P value |
|----------------------------------------------------------------|------------------------------------------------------------------|-----------------|
| ENSG00000189043                                                | NDUFA4 PPI subnetwork                                            | 0.95            |
| ENSG00000180817                                                | PPA1 PPI subnetwork                                              | 0.95            |
| GO:0003678                                                     | DNA helicase activity                                            | 0.95            |
| GO:0006775                                                     | fat-soluble vitamin metabolic process                            | 0.95            |
| ENSG00000088320                                                | REM1 PPI subnetwork                                              | 0.95            |
| ENSG00000022355                                                | GABRA1 PPI subnetwork                                            | 0.95            |
| ENSG00000167491                                                | GATAD2A PPI subnetwork                                           | 0.95            |
| GO:0014075                                                     | response to amine stimulus                                       | 0.95            |
| ENSG00000183765                                                | CHEK2 PPI subnetwork                                             | 0.95            |
| ENSG00000169189                                                | NSMCE1 PPI subnetwork                                            | 0.95            |
| MP:0004736                                                     | abnormal distortion product otoacoustic emission                 | 0.95            |
| GO:0010518                                                     | positive regulation of phospholipase activity                    | 0.95            |
| ENSG00000149136                                                | SSRP1 PPI subnetwork                                             | 0.95            |
| ENSG00000169925                                                | BRD3 PPI subnetwork                                              | 0.95            |
| GO:0072087                                                     | renal vesicle development                                        | 0.95            |
| REACTOME_SYNTHESIS_SECRETION_AND_INACTIVATION_OF_GLU           | REACTOME_SYNTHESIS_SECRETION_AND_INACTIVATION_OF_GLU             | 0.95            |
| GO:0031234                                                     | extrinsic to internal side of plasma membrane                    | 0.95            |
| GO:0032982                                                     | myosin filament                                                  | 0.95            |
| GO:0060249                                                     | anatomical structure homeostasis                                 | 0.95            |
| ENSG00000182473                                                | EXOC7 PPI subnetwork                                             | 0.95            |
| ENSG00000179091                                                | CYC1 PPI subnetwork                                              | 0.95            |
| GO:0031123                                                     | RNA 3'-end processing                                            | 0.95            |
| GO:0021772                                                     | olfactory bulb development                                       | 0.95            |
| GO:0021988                                                     | olfactory lobe development                                       | 0.95            |
| GO:0006099                                                     | tricarboxylic acid cycle                                         | 0.95            |
| ENSG00000173660                                                | UQCRH PPI subnetwork                                             | 0.95            |
| GO:0048024                                                     | regulation of nuclear mRNA splicing, via spliceosome             | 0.95            |
| ENSG00000172757                                                | CFL1 PPI subnetwork                                              | 0.95            |
| GO:0050890                                                     | cognition                                                        | 0.95            |
| GO:0070997                                                     | neuron death                                                     | 0.95            |
| GO:0014013                                                     | regulation of gliogenesis                                        | 0.95            |
| GO:0016411                                                     | acylglycerol O-acyltransferase activity                          | 0.95            |
| MP:0006007                                                     | abnormal basal ganglion morphology                               | 0.95            |
| ENSG00000090372                                                | STRN4 PPI subnetwork                                             | 0.95            |
| GO:0017137                                                     | Rab GTPase binding                                               | 0.95            |
| REACTOME_POST:ELONGATION_PROCESSING_OF_INTRON:CONTAINING_PRE:M | REACTOME_POST:ELONGATION_PROCESSING_OF_INTRON:CONTAINING_PRE:MRN | 0.95            |
| REACTOME_MRNA_3:END_PROCESSING                                 | REACTOME_MRNA_3:END_PROCESSING                                   | 0.95            |
| GO:0072088                                                     | nephron epithelium morphogenesis                                 | 0.95            |
| REACTOME_G_ALPHA_Z_SIGNALLING_EVENTS                           | REACTOME_G_ALPHA_Z_SIGNALLING_EVENTS                             | 0.95            |
| REACTOME_DUAL_INCISION_REACTION_IN_TC:NER                      | REACTOME_DUAL_INCISION_REACTION_IN_TC:NER                        | 0.95            |
| REACTOME_FORMATION_OF_TRANSCRIPTION:COUPLED_NER_TC:NER_REPAIR  | REACTOME_FORMATION_OF_TRANSCRIPTION:COUPLED_NER_TC:NER_REPAIR_CO | 0.95            |
| ENSG00000087302                                                | C14orf166 PPI subnetwork                                         | 0.95            |
| GO:0001975                                                     | response to amphetamine                                          | 0.95            |
| GO:0045454                                                     | cell redox homeostasis                                           | 0.95            |
| GO:0072329                                                     | monocarboxylic acid catabolic process                            | 0.95            |
| ENSG00000130479                                                | MAP1S PPI subnetwork                                             | 0.95            |
| MP:0002938                                                     | white spotting                                                   | 0.95            |
| ENSG00000049245                                                | VAMP3 PPI subnetwork                                             | 0.96            |
| GO:0042168                                                     | heme metabolic process                                           | 0.96            |

| Original gene set ID                                          | Original gene set description                                   | Nominal P value |
|---------------------------------------------------------------|-----------------------------------------------------------------|-----------------|
| REACTOME_TRANSFERRIN_ENDOCYTOSIS_AND_RECYCLING                | REACTOME_TRANSFERRIN_ENDOCYTOSIS_AND_RECYCLING                  | 0.96            |
| MP:0004624                                                    | abnormal thoracic cage morphology                               | 0.96            |
| ENSG000000101182                                              | PSMA7 PPI subnetwork                                            | 0.96            |
| GO:0007270                                                    | neuron-neuron synaptic transmission                             | 0.96            |
| MP:0006054                                                    | spinal hemorrhage                                               | 0.96            |
| GO:0051937                                                    | catecholamine transport                                         | 0.96            |
| ENSG000000141543                                              | EIF4A3 PPI subnetwork                                           | 0.96            |
| ENSG000000134057                                              | CCNB1 PPI subnetwork                                            | 0.96            |
| GO:0019861                                                    | flagellum                                                       | 0.96            |
| REACTOME_RNA_POL_II_CTD_PHOSPHORYLATION_AND_INTERACTION_WITH_ | REACTOME_RNA_POL_II_CTD_PHOSPHORYLATION_AND_INTERACTION_WITH_CE | 0.96            |
| GO:0030288                                                    | outer membrane-bounded periplasmic space                        | 0.96            |
| GO:0042597                                                    | periplasmic space                                               | 0.96            |
| GO:0072077                                                    | renal vesicle morphogenesis                                     | 0.96            |
| REACTOME_NEF_MEDIATED_DOWNREGULATION_OF_MHC_CLASS_I_COMPLEX   | REACTOME_NEF_MEDIATED_DOWNREGULATION_OF_MHC_CLASS_I_COMPLEX_CE  | 0.96            |
| ENSG000000163464                                              | CXCR1 PPI subnetwork                                            | 0.96            |
| GO:0042379                                                    | chemokine receptor binding                                      | 0.96            |
| ENSG000000065057                                              | NTHL1 PPI subnetwork                                            | 0.96            |
| ENSG000000169021                                              | UQCRFS1 PPI subnetwork                                          | 0.96            |
| KEGG_VALINE_LEUCINE_AND_ISOLEUCINE_DEGRADATION                | KEGG_VALINE_LEUCINE_AND_ISOLEUCINE_DEGRADATION                  | 0.96            |
| GO:0022900                                                    | electron transport chain                                        | 0.96            |
| GO:0016358                                                    | dendrite development                                            | 0.96            |
| GO:0072006                                                    | nephron development                                             | 0.96            |
| ENSG000000166411                                              | IDH3A PPI subnetwork                                            | 0.96            |
| ENSG000000125356                                              | NDUFA1 PPI subnetwork                                           | 0.96            |
| GO:0072028                                                    | nephron morphogenesis                                           | 0.96            |
| MP:0002804                                                    | abnormal motor learning                                         | 0.96            |
| ENSG000000144848                                              | ATG3 PPI subnetwork                                             | 0.96            |
| ENSG000000125944                                              | HNRNPR PPI subnetwork                                           | 0.96            |
| KEGG_PARKINSONS_DISEASE                                       | KEGG_PARKINSONS_DISEASE                                         | 0.96            |
| GO:0014003                                                    | oligodendrocyte development                                     | 0.96            |
| GO:0043269                                                    | regulation of ion transport                                     | 0.96            |
| ENSG000000111445                                              | RFC5 PPI subnetwork                                             | 0.96            |
| GO:0031907                                                    | microbody lumen                                                 | 0.96            |
| GO:0005782                                                    | peroxisomal matrix                                              | 0.96            |
| ENSG000000147133                                              | TAF1 PPI subnetwork                                             | 0.96            |
| GO:0031625                                                    | ubiquitin protein ligase binding                                | 0.96            |
| ENSG000000164683                                              | HEY1 PPI subnetwork                                             | 0.96            |
| GO:0042572                                                    | retinol metabolic process                                       | 0.96            |
| ENSG000000145864                                              | GABRB2 PPI subnetwork                                           | 0.96            |
| ENSG000000170906                                              | NDUFA3 PPI subnetwork                                           | 0.96            |
| MP:0003964                                                    | abnormal noradrenaline level                                    | 0.96            |
| GO:0048475                                                    | coated membrane                                                 | 0.96            |
| GO:0030117                                                    | membrane coat                                                   | 0.96            |
| MP:0000061                                                    | fragile skeleton                                                | 0.96            |
| REACTOME_PROCESSING_OF_CAPPED_INTRONLESS_PRE:MRNA             | REACTOME_PROCESSING_OF_CAPPED_INTRONLESS_PRE:MRNA               | 0.96            |
| REACTOME_POST:ELONGATION_PROCESSING_OF_INTRONLESS_PRE:MRNA    | REACTOME_POST:ELONGATION_PROCESSING_OF_INTRONLESS_PRE:MRNA      | 0.96            |
| ENSG000000184270                                              | HIST2H2AB PPI subnetwork                                        | 0.96            |
| ENSG000000071564                                              | TCF3 PPI subnetwork                                             | 0.96            |
| GO:0045685                                                    | regulation of glial cell differentiation                        | 0.96            |



| Original gene set ID                    | Original gene set description                                                      | Nominal P value |
|-----------------------------------------|------------------------------------------------------------------------------------|-----------------|
| GO:0021984                              | adenohypophysis development                                                        | 0.96            |
| GO:0009713                              | catechol-containing compound biosynthetic process                                  | 0.97            |
| GO:0042423                              | catecholamine biosynthetic process                                                 | 0.97            |
| GO:0034312                              | diol biosynthetic process                                                          | 0.97            |
| GO:0007202                              | activation of phospholipase C activity                                             | 0.97            |
| GO:0010039                              | response to iron ion                                                               | 0.97            |
| ENSG00000036257                         | CUL3 PPI subnetwork                                                                | 0.97            |
| GO:0035967                              | cellular response to topologically incorrect proteir                               | 0.97            |
| MP:0001961                              | abnormal reflex                                                                    | 0.97            |
| MP:0004859                              | abnormal synaptic plasticity                                                       | 0.97            |
| GO:0030261                              | chromosome condensation                                                            | 0.97            |
| ENSG00000063245                         | EPN1 PPI subnetwork                                                                | 0.97            |
| GO:0005227                              | calcium activated cation channel activity                                          | 0.97            |
| MP:0000149                              | abnormal scapula morphology                                                        | 0.97            |
| GO:0009452                              | RNA capping                                                                        | 0.97            |
| GO:0043928                              | exonucleolytic nuclear-transcribed mRNA catabolic process involved in deadenylatic | 0.97            |
| GO:0000291                              | nuclear-transcribed mRNA catabolic process, exonucleolytic                         | 0.97            |
| ENSG00000023228                         | NDUFS1 PPI subnetwork                                                              | 0.97            |
| ENSG00000009413                         | REV3L PPI subnetwork                                                               | 0.97            |
| GO:0006004                              | fucoase metabolic process                                                          | 0.97            |
| GO:0048169                              | regulation of long-term neuronal synaptic plasticity                               | 0.97            |
| MP:0001299                              | abnormal eye distance/ position                                                    | 0.97            |
| ENSG00000135940                         | COX5B PPI subnetwork                                                               | 0.97            |
| GO:0030219                              | megakaryocyte differentiation                                                      | 0.97            |
| ENSG00000151729                         | SLC25A4 PPI subnetwork                                                             | 0.97            |
| ENSG00000120656                         | TAF12 PPI subnetwork                                                               | 0.97            |
| MP:0002741                              | small olfactory bulb                                                               | 0.97            |
| GO:0045168                              | cell-cell signaling involved in cell fate commitment                               | 0.97            |
| ENSG00000124575                         | HIST1H1D PPI subnetwork                                                            | 0.97            |
| GO:0030145                              | manganese ion binding                                                              | 0.97            |
| GO:0030308                              | negative regulation of cell growth                                                 | 0.97            |
| GO:0005721                              | centromeric heterochromatin                                                        | 0.97            |
| GO:0007030                              | Golgi organization                                                                 | 0.97            |
| REACTOME_PERK_REGULATED_GENE_EXPRESSION | REACTOME_PERK_REGULATED_GENE_EXPRESSION                                            | 0.97            |
| MP:0004632                              | abnormal cochlear OHC efferent innervation pattern                                 | 0.97            |
| GO:0051149                              | positive regulation of muscle cell differentiator                                  | 0.97            |
| MP:0003031                              | acidosis                                                                           | 0.97            |
| ENSG00000160075                         | SSU72 PPI subnetwork                                                               | 0.97            |
| MP:0000759                              | abnormal skeletal muscle morphology                                                | 0.97            |
| MP:0000897                              | abnormal midbrain morphology                                                       | 0.97            |
| ENSG00000145216                         | FIP1L1 PPI subnetwork                                                              | 0.97            |
| GO:0035282                              | segmentation                                                                       | 0.97            |
| ENSG00000175305                         | CCNE2 PPI subnetwork                                                               | 0.97            |
| ENSG00000163939                         | PBRM1 PPI subnetwork                                                               | 0.97            |
| GO:0048278                              | vesicle docking                                                                    | 0.97            |
| MP:0001629                              | abnormal heart rate                                                                | 0.97            |
| ENSG00000120008                         | WDR11 PPI subnetwork                                                               | 0.97            |
| KEGG_HISTIDINE_METABOLISM               | KEGG_HISTIDINE_METABOLISM                                                          | 0.97            |
| GO:0007379                              | segment specification                                                              | 0.97            |



**Original gene set ID**

ENSG00000116903  
 MP:0004180  
 GO:0010863  
 GO:0042375  
 GO:0072074  
 GO:0000132  
 GO:0051294  
 ENSG00000130288  
 GO:0033238  
 KEGG\_REGULATION\_OF\_AUTOPHAGY  
 ENSG00000197373  
 ENSG00000168255  
 GO:0060993  
 ENSG00000102977  
 ENSG00000139132  
 GO:0043270  
 GO:0046496  
 GO:0051925  
 ENSG00000100968  
 GO:0031640  
 ENSG00000196628  
 GO:0042659  
 ENSG00000145041  
 ENSG00000125968  
 ENSG00000172288  
 ENSG00000172352  
 GO:0042417  
 GO:0070469  
 GO:0007612  
 GO:0010517  
 GO:0045778  
 GO:0005746  
 GO:0000242  
 GO:0042745  
 ENSG00000067829  
 GO:0006783  
 GO:0016896  
 GO:0050832  
 ENSG00000119888  
 GO:0000940  
 GO:0001656  
 REACTOME\_MRNA\_CAPPING  
 ENSG00000206282  
 ENSG00000206210  
 ENSG00000164032  
 GO:0009566  
 GO:0031128  
 ENSG00000004779  
 GO:0045471

**Original gene set description**

EXOC8 PPI subnetwork  
 failure of initiation of embryo turning  
 positive regulation of phospholipase C activity  
 quinone cofactor metabolic process  
 kidney mesenchyme development  
 establishment of mitotic spindle orientation  
 establishment of spindle orientation  
 ENSG00000130288 PPI subnetwork  
 regulation of cellular amine metabolic process  
 KEGG\_REGULATION\_OF\_AUTOPHAGY  
 ENSG00000197373 PPI subnetwork  
 POLR2J3 PPI subnetwork  
 kidney morphogenesis  
 ACD PPI subnetwork  
 FGD4 PPI subnetwork  
 positive regulation of ion transport  
 nicotinamide nucleotide metabolic process  
 regulation of calcium ion transport via voltage-gated calcium channel activity  
 NFATC4 PPI subnetwork  
 killing of cells of other organism  
 TCF4 PPI subnetwork  
 regulation of cell fate specification  
 VPRBP PPI subnetwork  
 ID1 PPI subnetwork  
 CDY1 PPI subnetwork  
 CDY1B PPI subnetwork  
 dopamine metabolic process  
 respiratory chain  
 learning  
 regulation of phospholipase activity  
 positive regulation of ossification  
 mitochondrial respiratory chain  
 pericentriolar material  
 circadian sleep/wake cycle  
 IDH3G PPI subnetwork  
 heme biosynthetic process  
 exoribonuclease activity, producing 5'-phosphomonoesters  
 defense response to fungus  
 EPCAM PPI subnetwork  
 condensed chromosome outer kinetochore  
 metanephros development  
 REACTOME\_MRNA\_CAPPING  
 RGL2 PPI subnetwork  
 ENSG00000206210 PPI subnetwork  
 H2AFZ PPI subnetwork  
 fertilization  
 developmental induction  
 NDUFAB1 PPI subnetwork  
 response to ethanol

**Nominal P value**

0.97  
 0.97  
 0.97  
 0.97  
 0.97  
 0.97  
 0.97  
 0.97  
 0.97  
 0.97  
 0.97  
 0.97  
 0.97  
 0.97  
 0.97  
 0.97  
 0.97  
 0.97  
 0.97  
 0.97  
 0.97  
 0.97  
 0.97  
 0.97  
 0.97  
 0.97  
 0.97  
 0.97  
 0.97  
 0.97  
 0.97  
 0.97  
 0.97  
 0.97  
 0.97  
 0.97  
 0.97  
 0.97  
 0.97  
 0.97  
 0.97  
 0.97  
 0.97  
 0.97  
 0.97  
 0.97  
 0.97  
 0.97  
 0.97  
 0.97  
 0.97  
 0.97  
 0.97  
 0.97  
 0.97  
 0.97  
 0.97  
 0.97  
 0.98  
 0.98  
 0.98  
 0.98  
 0.98  
 0.98  
 0.98  
 0.98  
 0.98  
 0.98  
 0.98  
 0.98  
 0.98  
 0.98  
 0.98  
 0.98  
 0.98  
 0.98  
 0.98

| Original gene set ID                                          | Original gene set description                                    | Nominal P value |
|---------------------------------------------------------------|------------------------------------------------------------------|-----------------|
| GO:0002825                                                    | regulation of T-helper 1 type immune response                    | 0.98            |
| MP:0002953                                                    | thick ventricular wall                                           | 0.98            |
| ENSG000000204120                                              | GIGYF2 PPI subnetwork                                            | 0.98            |
| ENSG000000167792                                              | NDUFV1 PPI subnetwork                                            | 0.98            |
| REACTOME_DEPOSITION_OF_NEW_CENPA:CONTAINING_NUCLEOSOMES_AT_T  | REACTOME_DEPOSITION_OF_NEW_CENPA:CONTAINING_NUCLEOSOMES_AT_THE_  | 0.98            |
| REACTOME_NUCLEOSOME_ASSEMBLY                                  | REACTOME_NUCLEOSOME_ASSEMBLY                                     | 0.98            |
| ENSG000000164919                                              | COX6C PPI subnetwork                                             | 0.98            |
| GO:0040001                                                    | establishment of mitotic spindle localizati                      | 0.98            |
| GO:0003401                                                    | axis elongation                                                  | 0.98            |
| GO:0043524                                                    | negative regulation of neuron apoptotic process                  | 0.98            |
| GO:0043176                                                    | amine binding                                                    | 0.98            |
| GO:0009062                                                    | fatty acid catabolic process                                     | 0.98            |
| ENSG000000136888                                              | ATP6V1G1 PPI subnetwork                                          | 0.98            |
| ENSG00000010244                                               | ZNF207 PPI subnetwork                                            | 0.98            |
| GO:0016835                                                    | carbon-oxygen lyase activity                                     | 0.98            |
| KEGG_CARDIAC_MUSCLE_CONTRACTION                               | KEGG_CARDIAC_MUSCLE_CONTRACTION                                  | 0.98            |
| ENSG000000140416                                              | TPM1 PPI subnetwork                                              | 0.98            |
| GO:0060572                                                    | morphogenesis of an epithelial bud                               | 0.98            |
| ENSG000000065534                                              | MYLK PPI subnetwork                                              | 0.98            |
| ENSG000000167306                                              | MYO5B PPI subnetwork                                             | 0.98            |
| GO:0031593                                                    | polyubiquitin binding                                            | 0.98            |
| MP:0004725                                                    | decreased platelet serotonin level                               | 0.98            |
| GO:0072527                                                    | pyrimidine-containing compound metabolic process                 | 0.98            |
| MP:0006065                                                    | abnormal heart position or orientation                           | 0.98            |
| ENSG000000164258                                              | NDUFS4 PPI subnetwork                                            | 0.98            |
| MP:0009232                                                    | abnormal sperm nucleus morphology                                | 0.98            |
| GO:0010632                                                    | regulation of epithelial cell migration                          | 0.98            |
| GO:0051924                                                    | regulation of calcium ion transport                              | 0.98            |
| MP:0004215                                                    | abnormal myocardial fiber physiology                             | 0.98            |
| ENSG000000186230                                              | ZNF749 PPI subnetwork                                            | 0.98            |
| GO:0010824                                                    | regulation of centrosome duplication                             | 0.98            |
| ENSG000000187555                                              | USP7 PPI subnetwork                                              | 0.98            |
| ENSG000000215697                                              | ENSG000000215697 PPI subnetwork                                  | 0.98            |
| ENSG000000168397                                              | ATG4B PPI subnetwork                                             | 0.98            |
| GO:0071241                                                    | cellular response to inorganic substance                         | 0.98            |
| GO:0015939                                                    | pantothenate metabolic process                                   | 0.98            |
| MP:0008412                                                    | increased cellular sensitivity to oxidative stress               | 0.98            |
| ENSG000000173894                                              | CBX2 PPI subnetwork                                              | 0.98            |
| GO:0060675                                                    | ureteric bud morphogenesis                                       | 0.98            |
| REACTOME_CLEAVAGE_OF_GROWING_TRANSCRIPT_IN_THE_TERMINATION_RI | REACTOME_CLEAVAGE_OF_GROWING_TRANSCRIPT_IN_THE_TERMINATION_REGIC | 0.98            |
| REACTOME_RNA_POLYMERASE_II_TRANSCRIPTION_TERMINATION          | REACTOME_RNA_POLYMERASE_II_TRANSCRIPTION_TERMINATION             | 0.98            |
| REACTOME_POST:ELONGATION_PROCESSING_OF_THE_TRANSCRIPT         | REACTOME_POST:ELONGATION_PROCESSING_OF_THE_TRANSCRIPT            | 0.98            |
| ENSG000000032514                                              | ENSG000000032514 PPI subnetwork                                  | 0.98            |
| ENSG000000119013                                              | NDUFB3 PPI subnetwork                                            | 0.98            |
| ENSG000000120251                                              | GRIA2 PPI subnetwork                                             | 0.98            |
| GO:0006119                                                    | oxidative phosphorylation                                        | 0.98            |
| ENSG000000099246                                              | RAB18 PPI subnetwork                                             | 0.98            |
| GO:0061053                                                    | somite development                                               | 0.98            |
| GO:0033275                                                    | actin-myosin filament sliding                                    | 0.98            |

| Original gene set ID                                              | Original gene set description                                                    | Nominal P value |
|-------------------------------------------------------------------|----------------------------------------------------------------------------------|-----------------|
| GO:0030049                                                        | muscle filament sliding                                                          | 0.98            |
| MP:0000433                                                        | microcephaly                                                                     | 0.98            |
| ENSG000000167258                                                  | CDK12 PPI subnetwork                                                             | 0.98            |
| GO:0016634                                                        | oxidoreductase activity, acting on the CH-CH group of donors, oxygen as acceptor | 0.98            |
| GO:0021952                                                        | central nervous system projection neuron axonogenesis                            | 0.98            |
| ENSG000000124164                                                  | VAPB PPI subnetwork                                                              | 0.98            |
| GO:0009109                                                        | coenzyme catabolic process                                                       | 0.98            |
| MP:0004087                                                        | abnormal muscle fiber morphology                                                 | 0.98            |
| ENSG000000182117                                                  | NOP10 PPI subnetwork                                                             | 0.98            |
| GO:0051187                                                        | cofactor catabolic process                                                       | 0.98            |
| REACTOME_RESOLUTION_OF_AP_SITES_VIA_THE_MULTIPLE_NUCLEOTIDE_PATCH | REACTOME_RESOLUTION_OF_AP_SITES_VIA_THE_MULTIPLE_NUCLEOTIDE_PATCH                | 0.98            |
| REACTOME_REMOVAL_OF_DNA_PATCH_CONTAINING_ABASIC_RESIDUE           | REACTOME_REMOVAL_OF_DNA_PATCH_CONTAINING_ABASIC_RESIDUE                          | 0.98            |
| GO:0090183                                                        | regulation of kidney development                                                 | 0.98            |
| ENSG000000003096                                                  | KLHL13 PPI subnetwork                                                            | 0.98            |
| ENSG000000170515                                                  | PA2G4 PPI subnetwork                                                             | 0.98            |
| ENSG000000125447                                                  | GGA3 PPI subnetwork                                                              | 0.98            |
| ENSG000000077721                                                  | UBE2A PPI subnetwork                                                             | 0.98            |
| MP:0002674                                                        | abnormal sperm motility                                                          | 0.98            |
| MP:0001706                                                        | abnormal left-right axis patterning                                              | 0.98            |
| MP:0004132                                                        | absent embryonic cilia                                                           | 0.98            |
| GO:0001658                                                        | branching involved in ureteric bud morphogenesis                                 | 0.98            |
| GO:0008009                                                        | chemokine activity                                                               | 0.98            |
| GO:0060134                                                        | prepulse inhibition                                                              | 0.98            |
| ENSG000000163535                                                  | SGOL2 PPI subnetwork                                                             | 0.98            |
| GO:0006369                                                        | termination of RNA polymerase II transcription                                   | 0.98            |
| GO:0009898                                                        | internal side of plasma membrane                                                 | 0.98            |
| ENSG000000105968                                                  | H2AFV PPI subnetwork                                                             | 0.98            |
| GO:0007098                                                        | centrosome cycle                                                                 | 0.98            |
| ENSG000000092531                                                  | SNAP23 PPI subnetwork                                                            | 0.98            |
| GO:0006488                                                        | dolichol-linked oligosaccharide biosynthetic process                             | 0.99            |
| GO:0016101                                                        | diterpenoid metabolic process                                                    | 0.99            |
| ENSG000000171132                                                  | PRKCE PPI subnetwork                                                             | 0.99            |
| GO:0006513                                                        | protein monoubiquitination                                                       | 0.99            |
| GO:0042312                                                        | regulation of vasodilation                                                       | 0.99            |
| ENSG000000160194                                                  | NDUFV3 PPI subnetwork                                                            | 0.99            |
| GO:0009068                                                        | aspartate family amino acid catabolic process                                    | 0.99            |
| GO:0006904                                                        | vesicle docking involved in exocytosis                                           | 0.99            |
| ENSG00000010256                                                   | UQCRC1 PPI subnetwork                                                            | 0.99            |
| GO:0044236                                                        | multicellular organismal metabolic process                                       | 0.99            |
| GO:0008045                                                        | motor axon guidance                                                              | 0.99            |
| REACTOME_TRAFFICKING_OF_GLUR2:CONTAINING_AMPA_RECEPTORS           | REACTOME_TRAFFICKING_OF_GLUR2:CONTAINING_AMPA_RECEPTORS                          | 0.99            |
| ENSG000000139197                                                  | PEX5 PPI subnetwork                                                              | 0.99            |
| GO:0001523                                                        | retinoid metabolic process                                                       | 0.99            |
| MP:0002954                                                        | abnormal aerobic energy metabolism                                               | 0.99            |
| MP:0011386                                                        | increased metanephric mesenchyme apoptosis                                       | 0.99            |
| GO:0072163                                                        | mesonephric epithelium development                                               | 0.99            |
| GO:0072164                                                        | mesonephric tubule development                                                   | 0.99            |
| ENSG000000180104                                                  | EXOC3 PPI subnetwork                                                             | 0.99            |
| ENSG000000212872                                                  | ENSG000000212872 PPI subnetwork                                                  | 0.99            |

| Original gene set ID                            | Original gene set description                                | Nominal P value |
|-------------------------------------------------|--------------------------------------------------------------|-----------------|
| ENSG00000212871                                 | ENSG00000212871 PPI subnetwork                               | 0.99            |
| ENSG00000198868                                 | ENSG00000198868 PPI subnetwork                               | 0.99            |
| ENSG00000198840                                 | MT-ND3 PPI subnetwork                                        | 0.99            |
| GO:0042693                                      | muscle cell fate commitment                                  | 0.99            |
| ENSG00000100883                                 | SRP54 PPI subnetwork                                         | 0.99            |
| ENSG00000136521                                 | NDUFB5 PPI subnetwork                                        | 0.99            |
| ENSG00000164329                                 | PAPD4 PPI subnetwork                                         | 0.99            |
| GO:0006776                                      | vitamin A metabolic process                                  | 0.99            |
| ENSG00000132604                                 | TERF2 PPI subnetwork                                         | 0.99            |
| ENSG00000115286                                 | NDUFS7 PPI subnetwork                                        | 0.99            |
| ENSG00000104313                                 | EYA1 PPI subnetwork                                          | 0.99            |
| ENSG00000139112                                 | GABARAPL1 PPI subnetwork                                     | 0.99            |
| GO:0008527                                      | taste receptor activity                                      | 0.99            |
| MP:0008415                                      | abnormal neurite morphology                                  | 0.99            |
| ENSG00000105829                                 | BET1 PPI subnetwork                                          | 0.99            |
| GO:0043130                                      | ubiquitin binding                                            | 0.99            |
| ENSG00000197969                                 | VPS13A PPI subnetwork                                        | 0.99            |
| GO:0015844                                      | monoamine transport                                          | 0.99            |
| ENSG00000168653                                 | NDUFS5 PPI subnetwork                                        | 0.99            |
| GO:0005665                                      | DNA-directed RNA polymerase II, core complex                 | 0.99            |
| GO:0045687                                      | positive regulation of glial cell differentiation            | 0.99            |
| ENSG00000106636                                 | YKT6 PPI subnetwork                                          | 0.99            |
| REACTOME_SYNTHESIS_OF_BILE_ACIDS_AND_BILE_SALTS | REACTOME_SYNTHESIS_OF_BILE_ACIDS_AND_BILE_SALTS              | 0.99            |
| MP:0005399                                      | increased susceptibility to fungal infection                 | 0.99            |
| ENSG00000198886                                 | MT-ND4 PPI subnetwork                                        | 0.99            |
| ENSG00000212869                                 | ENSG00000212869 PPI subnetwork                               | 0.99            |
| ENSG00000198695                                 | MT-ND6 PPI subnetwork                                        | 0.99            |
| ENSG00000203811                                 | HIST2H3C PPI subnetwork                                      | 0.99            |
| ENSG00000183598                                 | HIST2H3D PPI subnetwork                                      | 0.99            |
| ENSG00000099795                                 | NDUFB7 PPI subnetwork                                        | 0.99            |
| ENSG00000159352                                 | PSMD4 PPI subnetwork                                         | 0.99            |
| ENSG00000204218                                 | ENSG00000204218 PPI subnetwork                               | 0.99            |
| ENSG00000109911                                 | ELP4 PPI subnetwork                                          | 0.99            |
| ENSG00000180871                                 | CXCR2 PPI subnetwork                                         | 0.99            |
| GO:0004527                                      | exonuclease activity                                         | 0.99            |
| GO:0016645                                      | oxidoreductase activity, acting on the CH-NH group of donors | 0.99            |
| GO:0050919                                      | negative chemotaxis                                          | 0.99            |
| GO:0001662                                      | behavioral fear response                                     | 0.99            |
| ENSG00000147601                                 | TERF1 PPI subnetwork                                         | 0.99            |
| GO:0030890                                      | positive regulation of B cell proliferation                  | 0.99            |
| GO:0034311                                      | diol metabolic process                                       | 0.99            |
| GO:0006584                                      | catecholamine metabolic process                              | 0.99            |
| GO:0009712                                      | catechol-containing compound metabolic process               | 0.99            |
| ENSG00000128513                                 | POT1 PPI subnetwork                                          | 0.99            |
| ENSG00000162129                                 | CLPB PPI subnetwork                                          | 0.99            |
| GO:0019783                                      | small conjugating protein-specific protease activity         | 0.99            |
| GO:0032182                                      | small conjugating protein binding                            | 0.99            |
| ENSG00000006712                                 | PAF1 PPI subnetwork                                          | 0.99            |
| ENSG00000134014                                 | ELP3 PPI subnetwork                                          | 0.99            |

| Original gene set ID                             | Original gene set description                      | Nominal P value |
|--------------------------------------------------|----------------------------------------------------|-----------------|
| GO:0042537                                       | benzene-containing compound metabolic process      | 0.99            |
| ENSG00000197579                                  | TOPORS PPI subnetwork                              | 0.99            |
| ENSG00000054116                                  | TRAPPC3 PPI subnetwork                             | 0.99            |
| GO:0071824                                       | protein-DNA complex subunit organization           | 0.99            |
| ENSG00000143614                                  | GATAD2B PPI subnetwork                             | 0.99            |
| GO:0070252                                       | actin-mediated cell contraction                    | 0.99            |
| GO:0021955                                       | central nervous system neuron axonogenesis         | 0.99            |
| GO:0046513                                       | ceramide biosynthetic process                      | 0.99            |
| GO:0004843                                       | ubiquitin-specific protease activity               | 0.99            |
| ENSG00000213496                                  | ENSG00000213496 PPI subnetwork                     | 0.99            |
| ENSG00000197265                                  | GTF2E2 PPI subnetwork                              | 0.99            |
| GO:0005747                                       | mitochondrial respiratory chain complex I          | 0.99            |
| GO:0045271                                       | respiratory chain complex I                        | 0.99            |
| GO:0030964                                       | NADH dehydrogenase complex                         | 0.99            |
| GO:0045652                                       | regulation of megakaryocyte differentiation        | 0.99            |
| GO:0007099                                       | centriole replication                              | 0.99            |
| MP:0001899                                       | absent long term depression                        | 0.99            |
| ENSG00000197548                                  | ATG7 PPI subnetwork                                | 0.99            |
| MP:0000819                                       | abnormal olfactory bulb morphology                 | 0.99            |
| GO:0060174                                       | limb bud formation                                 | 0.99            |
| GO:0031055                                       | chromatin remodeling at centromere                 | 0.99            |
| ENSG00000125798                                  | FOXA2 PPI subnetwork                               | 0.99            |
| ENSG00000188459                                  | ENSG00000188459 PPI subnetwork                     | 0.99            |
| ENSG00000197930                                  | ERO1L PPI subnetwork                               | 0.99            |
| GO:0015872                                       | dopamine transport                                 | 0.99            |
| GO:0032963                                       | collagen metabolic process                         | 0.99            |
| ENSG00000119048                                  | UBE2B PPI subnetwork                               | 0.99            |
| ENSG00000168393                                  | DTYMK PPI subnetwork                               | 0.99            |
| ENSG00000215694                                  | ENSG00000215694 PPI subnetwork                     | 0.99            |
| GO:0043486                                       | histone exchange                                   | 0.99            |
| GO:0034502                                       | protein localization to chromosome                 | 0.99            |
| GO:0005230                                       | extracellular ligand-gated ion channel activity    | 0.99            |
| ENSG00000147853                                  | AK3 PPI subnetwork                                 | 0.99            |
| GO:0009081                                       | branched chain family amino acid metabolic process | 0.99            |
| GO:0007618                                       | mating                                             | 0.99            |
| GO:0030534                                       | adult behavior                                     | 0.99            |
| GO:0008137                                       | NADH dehydrogenase (ubiquinone) activity           | 0.99            |
| GO:0050136                                       | NADH dehydrogenase (quinone) activity              | 0.99            |
| GO:0003954                                       | NADH dehydrogenase activity                        | 0.99            |
| ENSG00000163032                                  | VSNL1 PPI subnetwork                               | 0.99            |
| GO:0004953                                       | icosanoid receptor activity                        | 0.99            |
| GO:0004954                                       | prostanoid receptor activity                       | 0.99            |
| GO:0033572                                       | transferrin transport                              | 0.99            |
| GO:0015682                                       | ferric iron transport                              | 0.99            |
| ENSG00000130176                                  | CNN1 PPI subnetwork                                | 0.99            |
| ENSG00000183648                                  | NDUFB1 PPI subnetwork                              | 0.99            |
| ENSG00000127184                                  | COX7C PPI subnetwork                               | 0.99            |
| GO:0001964                                       | startle response                                   | 0.99            |
| REACTOME_MITOCHONDRIAL_FATTY_ACID_BETA:OXIDATION | REACTOME_MITOCHONDRIAL_FATTY_ACID_BETA:OXIDATION   | 0.99            |

| Original gene set ID | Original gene set description                                                    | Nominal P value |
|----------------------|----------------------------------------------------------------------------------|-----------------|
| GO:0007494           | midgut development                                                               | 0.99            |
| ENSG00000124702      | KLHDC3 PPI subnetwork                                                            | 0.99            |
| ENSG00000178127      | NDUFV2 PPI subnetwork                                                            | 0.99            |
| ENSG00000212870      | ENSG00000212870 PPI subnetwork                                                   | 0.99            |
| ENSG00000198786      | MT-ND5 PPI subnetwork                                                            | 0.99            |
| GO:0042596           | fear response                                                                    | 0.99            |
| MP:0002243           | abnormal vomeronasal organ morphology                                            | 0.99            |
| GO:0072529           | pyrimidine-containing compound catabolic process                                 | 0.99            |
| ENSG00000147123      | NDUFB11 PPI subnetwork                                                           | 0.99            |
| MP:0000747           | muscle weakness                                                                  | 0.99            |
| GO:0071103           | DNA conformation change                                                          | 0.99            |
| ENSG00000185513      | L3MBTL1 PPI subnetwork                                                           | 0.99            |
| GO:0050684           | regulation of mRNA processing                                                    | 1               |
| GO:0006739           | NADP metabolic process                                                           | 1               |
| GO:0044259           | multicellular organismal macromolecule metabolic process                         | 1               |
| ENSG00000138029      | HADHB PPI subnetwork                                                             | 1               |
| GO:0006740           | NADPH regeneration                                                               | 1               |
| ENSG00000108587      | GOSR1 PPI subnetwork                                                             | 1               |
| ENSG00000109390      | NDUFC1 PPI subnetwork                                                            | 1               |
| ENSG00000172301      | C17orf79 PPI subnetwork                                                          | 1               |
| GO:0002209           | behavioral defense response                                                      | 1               |
| KEGG_PROTEIN_EXPORT  | KEGG_PROTEIN_EXPORT                                                              | 1               |
| GO:0046520           | sphingoid biosynthetic process                                                   | 1               |
| GO:0016655           | oxidoreductase activity, acting on NADH or NADPH, quinone or similar compound as | 1               |
| ENSG00000112357      | PEX7 PPI subnetwork                                                              | 1               |
| ENSG00000111875      | ASF1A PPI subnetwork                                                             | 1               |
| ENSG00000185214      | ENSG00000185214 PPI subnetwork                                                   | 1               |
| GO:0009262           | deoxyribonucleotide metabolic process                                            | 1               |
| ENSG00000155511      | GRIA1 PPI subnetwork                                                             | 1               |
| GO:0065004           | protein-DNA complex assembly                                                     | 1               |
| GO:0051952           | regulation of amine transport                                                    | 1               |
| GO:0003924           | GTPase activity                                                                  | 1               |
| ENSG00000151366      | NDUFC2 PPI subnetwork                                                            | 1               |
| ENSG00000147416      | ATP6V1B2 PPI subnetwork                                                          | 1               |
| GO:0004869           | cysteine-type endopeptidase inhibitor activity                                   | 1               |
| MP:0010454           | abnormal truncus arteriosus septation                                            | 1               |
| GO:0034728           | nucleosome organization                                                          | 1               |
| ENSG00000166963      | MAP1A PPI subnetwork                                                             | 1               |
| ENSG00000115738      | ID2 PPI subnetwork                                                               | 1               |
| ENSG00000187837      | HIST1H1C PPI subnetwork                                                          | 1               |
| GO:0034080           | CenH3-containing nucleosome assembly at centromere                               | 1               |
| GO:0006336           | DNA replication-independent nucleosome assembly                                  | 1               |
| GO:0034724           | DNA replication-independent nucleosome organization                              | 1               |
| ENSG00000185621      | LMLN PPI subnetwork                                                              | 1               |
| GO:0003995           | acyl-CoA dehydrogenase activity                                                  | 1               |
| MP:0008531           | increased chemical nociceptive threshold                                         | 1               |
| ENSG00000121390      | PSPC1 PPI subnetwork                                                             | 1               |
| GO:0021871           | forebrain regionalization                                                        | 1               |
| ENSG00000206440      | NFKBIL1 PPI subnetwork                                                           | 1               |

| Original gene set ID                                          | Original gene set description                                       | Nominal P value |
|---------------------------------------------------------------|---------------------------------------------------------------------|-----------------|
| ENSG00000168593                                               | ENSG00000168593 PPI subnetwork                                      | 1               |
| MP:0005480                                                    | increased circulating triiodothyronine leve                         | 1               |
| GO:0006098                                                    | pentose-phosphate shunt                                             | 1               |
| GO:0042401                                                    | cellular biogenic amine biosynthetic process                        | 1               |
| GO:0000178                                                    | exosome (RNase complex)                                             | 1               |
| ENSG00000198888                                               | MT-ND1 PPI subnetwork                                               | 1               |
| GO:0042136                                                    | neurotransmitter biosynthetic process                               | 1               |
| ENSG00000131747                                               | TOP2A PPI subnetwork                                                | 1               |
| ENSG00000131495                                               | NDUFA2 PPI subnetwork                                               | 1               |
| REACTOME_MRNA_DECAY_BY_3_TO_5_EXORIBONUCLEASE                 | REACTOME_MRNA_DECAY_BY_3_TO_5_EXORIBONUCLEASE                       | 1               |
| ENSG00000165264                                               | NDUFB6 PPI subnetwork                                               | 1               |
| MP:0002007                                                    | increased cellular sensitivity to gamma-irradiation                 | 1               |
| ENSG00000092330                                               | TINF2 PPI subnetwork                                                | 1               |
| ENSG00000212876                                               | ENSG00000212876 PPI subnetwork                                      | 1               |
| ENSG00000198763                                               | MT-ND2 PPI subnetwork                                               | 1               |
| GO:0006333                                                    | chromatin assembly or disassembly                                   | 1               |
| GO:0031497                                                    | chromatin assembly                                                  | 1               |
| GO:0007628                                                    | adult walking behavior                                              | 1               |
| GO:0016780                                                    | phosphotransferase activity, for other substituted phosphate group: | 1               |
| GO:0033540                                                    | fatty acid beta-oxidation using acyl-CoA oxidase                    | 1               |
| ENSG00000083896                                               | YTHDC1 PPI subnetwork                                               | 1               |
| GO:0032204                                                    | regulation of telomere maintenance                                  | 1               |
| ENSG00000108671                                               | PSMD11 PPI subnetwork                                               | 1               |
| GO:0001504                                                    | neurotransmitter uptake                                             | 1               |
| ENSG00000108468                                               | CBX1 PPI subnetwork                                                 | 1               |
| ENSG00000079462                                               | PFAFH1B3 PPI subnetwork                                             | 1               |
| GO:0015992                                                    | proton transport                                                    | 1               |
| GO:0009378                                                    | four-way junction helicase activity                                 | 1               |
| ENSG00000116288                                               | PARK7 PPI subnetwork                                                | 1               |
| REACTOME_RESPIRATORY_ELECTRON_TRANSPORT                       | REACTOME_RESPIRATORY_ELECTRON_TRANSPORT                             | 1               |
| GO:0021536                                                    | diencephalon development                                            | 1               |
| REACTOME_RESPIRATORY_ELECTRON_TRANSPORT_ATP_SYNTHESIS_BY_CHEM | REACTOME_RESPIRATORY_ELECTRON_TRANSPORT_ATP_SYNTHESIS_BY_CHEMIOSM   | 1               |
| ENSG00000013275                                               | PSMC4 PPI subnetwork                                                | 1               |
| GO:0006818                                                    | hydrogen transport                                                  | 1               |
| ENSG00000167774                                               | NDUFA7 PPI subnetwork                                               | 1               |
| GO:0006282                                                    | regulation of DNA repair                                            | 1               |
| GO:0006323                                                    | DNA packaging                                                       | 1               |
| GO:0050922                                                    | negative regulation of chemotaxis                                   | 1               |
| GO:0015991                                                    | ATP hydrolysis coupled proton transport                             | 1               |
| GO:0015988                                                    | energy coupled proton transport, against electrochemical gradien    | 1               |
| GO:0015078                                                    | hydrogen ion transmembrane transporter activity                     | 1               |
| ENSG00000111880                                               | RNGTT PPI subnetwork                                                | 1               |
| KEGG_OXIDATIVE_PHOSPHORYLATION                                | KEGG_OXIDATIVE_PHOSPHORYLATION                                      | 1               |
| GO:0008344                                                    | adult locomotory behavior                                           | 1               |
| GO:0031290                                                    | retinal ganglion cell axon guidance                                 | 1               |
| ENSG00000140990                                               | NDUFB10 PPI subnetwork                                              | 1               |
| ENSG00000153140                                               | CETN3 PPI subnetwork                                                | 1               |
| ENSG00000120696                                               | KBTBD7 PPI subnetwork                                               | 1               |
| GO:0006334                                                    | nucleosome assembly                                                 | 1               |

| Original gene set ID                                            | Original gene set description                                      | Nominal P value |
|-----------------------------------------------------------------|--------------------------------------------------------------------|-----------------|
| GO:0006586                                                      | indolalkylamine metabolic process                                  | 1               |
| GO:0042430                                                      | indole-containing compound metabolic process                       | 1               |
| GO:0018958                                                      | phenol-containing compound metabolic process                       | 1               |
| GO:0000381                                                      | regulation of alternative nuclear mRNA splicing, via spliceosome   | 1               |
| ENSG00000108433                                                 | GOSR2 PPI subnetwork                                               | 1               |
| GO:0001963                                                      | synaptic transmission, dopaminergic                                | 1               |
| REACTOME_E2F:ENABLED_INHIBITION_OF_PRE:REPLICATION_COMPLEX_FORM | REACTOME_E2F:ENABLED_INHIBITION_OF_PRE:REPLICATION_COMPLEX_FORMATI | 1               |
| GO:0006635                                                      | fatty acid beta-oxidation                                          | 1               |
| ENSG00000203813                                                 | HIST1H3H PPI subnetwork                                            | 1               |
| ENSG00000203852                                                 | HIST2H3A PPI subnetwork                                            | 1               |
| ENSG00000131143                                                 | COX4I1 PPI subnetwork                                              | 1               |
| ENSG00000166848                                                 | TERF2IP PPI subnetwork                                             | 1               |
| MP:0000761                                                      | thin diaphragm muscle                                              | 1               |
| GO:0021983                                                      | pituitary gland development                                        | 1               |
| ENSG00000115677                                                 | HDLBP PPI subnetwork                                               | 1               |
| ENSG00000113327                                                 | GABRG2 PPI subnetwork                                              | 1               |
| GO:0006879                                                      | cellular iron ion homeostasis                                      | 1               |
| GO:0021756                                                      | striatum development                                               | 1               |
| GO:2001020                                                      | regulation of response to DNA damage stimulus                      | 1               |
| GO:0043044                                                      | ATP-dependent chromatin remodeling                                 | 1               |
| GO:0006576                                                      | cellular biogenic amine metabolic process                          | 1               |
| GO:0009636                                                      | response to toxin                                                  | 1               |
| GO:0032200                                                      | telomere organization                                              | 1               |
| GO:0009083                                                      | branched chain family amino acid catabolic process                 | 1               |
| REACTOME_BRANCHED:CHAIN_AMINO_ACID_CATABOLISM                   | REACTOME_BRANCHED:CHAIN_AMINO_ACID_CATABOLISM                      | 1               |
| REACTOME_PEROXISOMAL_LIPID_METABOLISM                           | REACTOME_PEROXISOMAL_LIPID_METABOLISM                              | 1               |
| ENSG00000179841                                                 | AKAP5 PPI subnetwork                                               | 1               |
| GO:0000723                                                      | telomere maintenance                                               | 1               |
| ENSG00000196532                                                 | HIST1H3C PPI subnetwork                                            | 1               |
| ENSG00000198366                                                 | HIST1H3A PPI subnetwork                                            | 1               |
| ENSG00000197153                                                 | HIST1H3J PPI subnetwork                                            | 1               |
| ENSG00000197409                                                 | HIST1H3D PPI subnetwork                                            | 1               |
| ENSG00000178458                                                 | ENSG00000178458 PPI subnetwork                                     | 1               |
| ENSG00000112727                                                 | ENSG00000112727 PPI subnetwork                                     | 1               |
| ENSG00000124693                                                 | HIST1H3B PPI subnetwork                                            | 1               |
| ENSG00000196966                                                 | HIST1H3E PPI subnetwork                                            | 1               |
| ENSG00000182572                                                 | HIST1H3I PPI subnetwork                                            | 1               |
| ENSG00000180198                                                 | RCC1 PPI subnetwork                                                | 1               |
| KEGG_ALZHEIMERS_DISEASE                                         | KEGG_ALZHEIMERS_DISEASE                                            | 1               |
| GO:0000380                                                      | alternative nuclear mRNA splicing, via spliceosome                 | 1               |
| GO:0017156                                                      | calcium ion-dependent exocytosis                                   | 1               |
